# Supplementary material for: Deaminative coupling of benzylamines and arylboronic acids
Source: Royal Society of Chemistry journal article supplement (doi:10.1039/d2sc06055h), 2023-01-01
Supplement: d2sc06055h1.pdf [file d2sc06055h1.pdf]

## Supporting Information for

# Deaminative coupling of benzylamines and arylboronic acids

Giedre Sirvinskaite, Julia C. Reisenbauer and Bill Morandi\*

\*bill.morandi@org.chem.ethz.ch

### Table of contents

|                                        |      |
|----------------------------------------|------|
| 1. General experimental details        | S2   |
| 2. Optimisation of reaction conditions | S3   |
| 3. Preparation of starting materials   | S9   |
| 4. Benzylamine substrate scope         | S14  |
| 5. Arylboronic acid substrate scope    | S29  |
| 6. Unsuccessful substrates             | S37  |
| 7. Mechanistic experiments             | S38  |
| 8. NMR spectra                         | S44  |
| 9. References                          | S133 |

## 1. General experimental details

**Materials:** Unless otherwise stated, reagents were used as supplied from commercial sources without any further purification. Isoamyl nitrite was purchased from Acros, phenylboronic acid from Fluorochem, benzylamine from Sigma-Aldrich, and sodium carbonate from VWR. Extra-dry chloroform was purchased from Acros and stored over 4 Å molecular sieves under N<sub>2</sub> atmosphere. Commercially available benzylamine hydrochloride salts (4-nitrobenzylamine hydrochloride from Sigma Aldrich, 3-nitrobenzylamine hydrochloride from ABCR, methyl 4-(aminomethyl)benzoate hydrochloride from Fluorochem and methyl 3-(aminomethyl)benzoate hydrochloride from Fluorochem) were dissolved in dichloromethane, washed with 1M NaOH and brine, dried over MgSO<sub>4</sub> and concentrated under reduced pressure to obtain the corresponding salt-free benzylamines. All reactions were carried out in 16 mL oven-dried vials under N<sub>2</sub> atmosphere unless stated otherwise.

**NMR:** <sup>1</sup>H-, <sup>2</sup>H-, <sup>13</sup>C- and <sup>19</sup>F-NMR spectra were recorded on a Bruker AVIII 400 MHz, a Bruker Neo 400 MHz, a Bruker Neo 500 MHz or a Bruker AVIII 600 MHz spectrometer and are reported in parts per million (ppm). <sup>1</sup>H-NMR spectra are calibrated with respect to the corresponding solvent residual peak (CHCl<sub>3</sub>: 7.26 ppm; DMSO: 2.50 ppm, acetone: 2.05 ppm). <sup>13</sup>C-NMR spectra are calibrated with respect to the corresponding solvent residual peak (CHCl<sub>3</sub>: 77.16 ppm; DMSO: 39.52 ppm, acetone: 206.26 ppm). <sup>19</sup>F-<sup>1</sup>H} NMR spectra are calibrated with respect to hexafluorobenzene as an external standard (C<sub>6</sub>F<sub>6</sub>: -161.64 ppm). Multiplet signals are reported as follows: s = singlet, d = doublet, t = triplet, q = quartet, p = pentet, h = heptet, m = multiplet, or combinations thereof. <sup>13</sup>C signals are acquired with proton decoupling and are singlets unless otherwise stated. The isomer ratios using <sup>13</sup>C NMR were determined by integrating the signals for the carbons at the benzylic position in all different isomeric products. The isomer ratios using <sup>19</sup>F NMR were determined using zg ig pulse sequence with relaxation delay (d1) of 30 s and acquisition time of 2.3 s.

**Gas chromatography (GC)** was recorded on a Shimadzu GC-2025 (capillary column: Macherey-Nagel OPTIMA 5, 30.0 m × 0.25 × 0.25 μm; carrier gas: H<sub>2</sub>). Calibration curves using *n*-dodecane as an internal standard were generated to determine GC yields.

**Analytical thin-layer chromatography (TLC)** was performed using silica gel 60 F254 coated aluminum sheets (Merck). Visualization was achieved by ultraviolet fluorescence (λ = 254 nm) and/or staining with phosphomolybdic acid (Note: the diarylmethane products are only weakly fluorescent at λ = 254 nm and staining using phosphomolybdic acid is required to visualize the compounds).

**Flash column chromatography** was performed with silica gel 60 (pore size = 60 Å, mesh: 40-63 μm from Sigma-Aldrich or SiliCycle) using Biotage Isolera One system with Sfär columns (collection wavelength λ = 220 nm).

**High resolution mass spectrometry (HRMS):** HRMS data were obtained by the mass spectrometry service in the Laboratorium für Organische Chemie at ETH Zürich on VG-TRIBRIB for electron impact ionization (EI), a Varian IonSpec Spectrometer for electrospray ionization (ESI) or an IonSpec Ultima. Fourier transform mass spectrometer for matrix-assisted laser desorption/ionization (MALDI) are reported as (m/z).

## 2. Optimisation of reaction conditions

### Initial hit

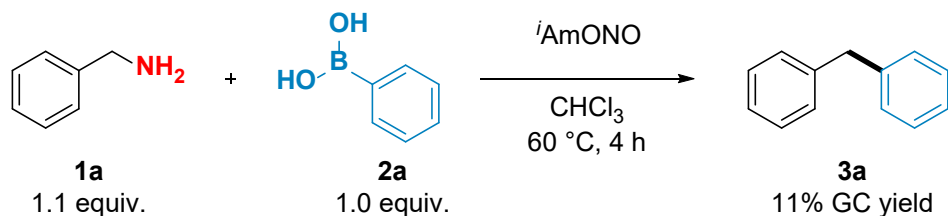

A 4 mL glass vial equipped with a stirring bar was charged with phenylboronic acid (30.5 mg, 0.250 mmol, 1.00 equiv.). Chloroform (1.0 mL) was then added followed by benzylamine (27.3  $\mu$ L, 0.275 mmol, 1.10 equiv.) and isoamyl nitrite (36.9  $\mu$ L, 0.275 mmol, 1.10 equiv.). The vial was sealed under air and the reaction was heated at 60°C for 4 h. The crude reaction mixture was allowed to cool down to room temperature and analysed with GC using *n*-dodecane (25  $\mu$ L) as an internal standard.

### Nitrite donor screen

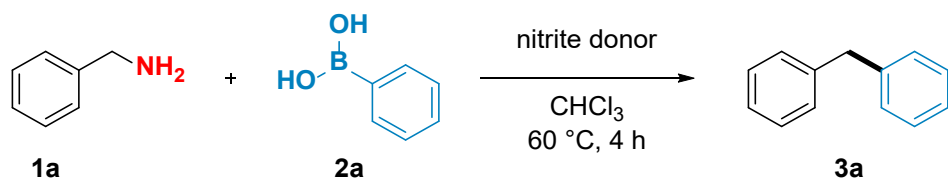

A 4 mL glass vial equipped with a stirring bar was charged with phenylboronic acid (30.5 mg, 0.250 mmol, 1.00 equiv.). Chloroform (1.0 mL) was then added followed by benzylamine (27.3  $\mu$ L, 0.275 mmol, 1.10 equiv.) and nitrite donor (0.275 mmol, 1.10 equiv.). The vial was sealed under air and the reaction was heated at 60°C for 4 h. The crude reaction mixture was allowed to cool down to room temperature and analysed with GC using *n*-dodecane (25  $\mu$ L) as an internal standard.

| Entry | Nitrite donor      | Solvent    | Time, h | GC yield of 3a [%] |
|-------|--------------------|------------|---------|--------------------|
| 1     | Tert-butyl nitrite | Chloroform | 4       | 3                  |
| 2     | NOBF <sub>4</sub>  | Chloroform | 4       | 0                  |
| 3     | Isoamyl nitrite    | Chloroform | 4       | 15                 |

### Time and equivalent screen

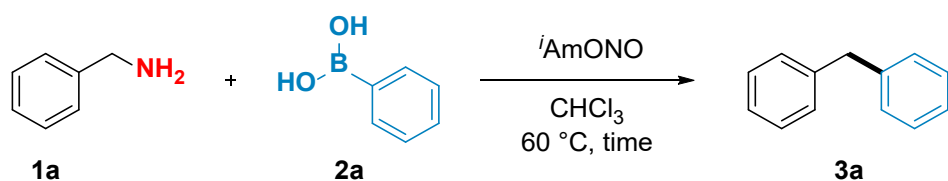

A 4 mL glass vial equipped with a stirring bar was charged with phenylboronic acid (30.5 mg, 0.250 mmol, 1.00 equiv.). Chloroform (1.0 mL) was then added followed by benzylamine (x equiv.) and

isoamyl nitrite (y equiv.). The reaction was sealed under air and heated at 60°C for the indicated time. The crude reaction mixture was allowed to cool down to room temperature and analysed with GC using *n*-dodecane (25 µL) as an internal standard.

| Entry | Benzylamine equiv. | Phenylboronic acid equiv. | <i>i</i> AmONO equiv. | Time, h | GC yield of 3a [%] |
|-------|--------------------|---------------------------|-----------------------|---------|--------------------|
| 1     | 1.1                | 1.0                       | 1.1                   | 4       | 10                 |
| 2     | 1.1                | 1.0                       | 1.1                   | 6       | 12                 |
| 3     | 1.1                | 1.0                       | 1.1                   | 8       | 14                 |
| 4     | 1.1                | 1.0                       | 1.1                   | 24      | 15                 |
| 5     | 1.5                | 1.0                       | 1.5                   | 4       | 15                 |
| 6     | 1.5                | 1.0                       | 1.5                   | 6       | 19                 |
| 7     | 1.5                | 1.0                       | 1.5                   | 8       | 21                 |
| 8     | 1.5                | 1.0                       | 1.5                   | 24      | 23                 |
| 9     | 2.0                | 1.0                       | 2.0                   | 4       | 21                 |
| 10    | 2.0                | 1.0                       | 2.0                   | 6       | 25                 |
| 11    | 2.0                | 1.0                       | 2.0                   | 8       | 26                 |
| 12    | 2.0                | 1.0                       | 2.0                   | 24      | 28                 |
| 13    | 4.0                | 1.0                       | 4.0                   | 4       | 31                 |
| 14    | 4.0                | 1.0                       | 4.0                   | 6       | 40                 |
| 15    | 4.0                | 1.0                       | 4.0                   | 8       | 44                 |
| 16    | 4.0                | 1.0                       | 4.0                   | 24      | 51                 |

#### Solvent and temperature screen

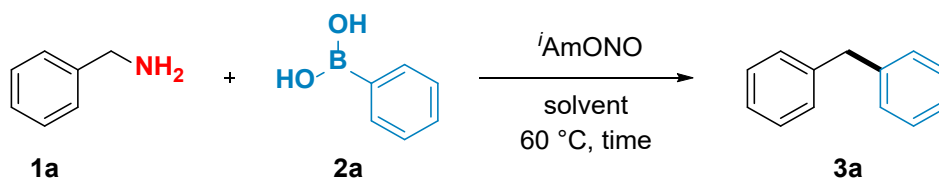

A 4 mL glass vial equipped with a stirring bar was charged with phenylboronic acid (30.5 mg, 0.250 mmol, 1.00 equiv.). The indicated solvent (1.0 mL) was then added followed by benzylamine (109 µL, 1.00 mmol, 4.00 equiv.) and isoamyl nitrite (134 µL, 1.00 mmol, 4.00 equiv.). The reaction was sealed under air and heated at 60°C for 24 h. The crude reaction mixture was allowed to cool down to room temperature and analysed with GC using *n*-dodecane (25 µL) as an internal standard.

| Entry | Solvent            | Temperature | GC yield of 3a [%] |
|-------|--------------------|-------------|--------------------|
| 1     | Chloroform         | 60          | 51                 |
| 2     | MeCN               | 60          | 29                 |
| 3     | PhCl               | 60          | 42                 |
| 4     | DMF                | 60          | 10                 |
| 5     | DMSO               | 60          | 8                  |
| 6     | Dioxane            | 60          | 27                 |
| 7     | EtOAc              | 60          | 33                 |
| 8     | 1,2-Dichloroethane | 60          | 37                 |
| 9     | THF                | 60          | 16                 |
| 10    | Toluene            | 60          | 40                 |

|           |                              |           |           |
|-----------|------------------------------|-----------|-----------|
| 11        | Xylene                       | 60        | 42        |
| 12        | DME                          | 60        | 26        |
| <b>13</b> | <b>Anhydrous chloroform</b>  | <b>60</b> | <b>61</b> |
| 14        | Anhydrous MeCN               | 80        | 40        |
| 15        | Anhydrous PhCl               | 80        | 11        |
| 16        | Anhydrous dioxane            | 80        | 29        |
| 17        | Anhydrous EtOAc              | 80        | 32        |
| 18        | Anhydrous 1,2-dichloroethane | 80        | 37        |
| 19        | Anhydrous toluene            | 80        | 37        |
| 20        | Anhydrous xylene             | 80        | 36        |
| 21        | Anhydrous DME                | 80        | 23        |
| 22        | Anhydrous PhCl               | 100       | 34        |
| 23        | Anhydrous dioxane            | 100       | 31        |
| 24        | Anhydrous toluene            | 100       | 35        |
| 25        | Anhydrous xylene             | 100       | 36        |
| 26        | Anhydrous chloroform         | 40        | 31        |
| 27        | Anhydrous chloroform         | rt        | 11        |

### Concentration screen

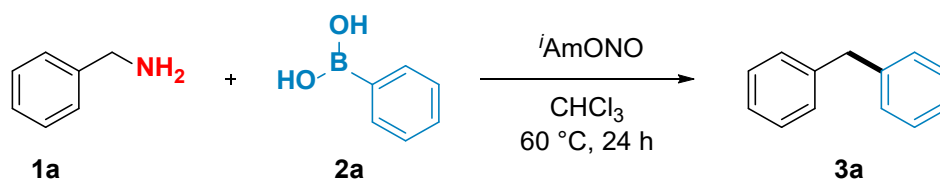

A 4 mL oven-dried glass vial equipped with a stirring bar was charged with phenylboronic acid (30.5 mg, 0.25 mmol, 1.00 equiv.). The vial was sealed with a septum cap and evacuated and refilled with N<sub>2</sub> three times. Anhydrous chloroform (x mL) was then added followed by benzylamine (109 μL, 1.00 mmol, 4.00 equiv.) and isoamyl nitrite (134 μL, 1.00 mmol, 4.00 equiv.). The reaction was heated at 60 °C for 24 h. The crude reaction mixture was allowed to cool down to room temperature and analysed with GC using *n*-dodecane (25 μL) as a standard.

| Entry    | Concentration | GC yield of 3a [%] |
|----------|---------------|--------------------|
| 1        | 1.0 M         | 69                 |
| 2        | 0.8 M         | 71                 |
| 3        | 0.67 M        | 72                 |
| 4        | 0.5 M         | 71                 |
| <b>5</b> | <b>0.4 M</b>  | <b>72</b>          |
| 6        | 0.2 M         | 72                 |
| 7        | 0.1 M         | 61                 |

## Base screening

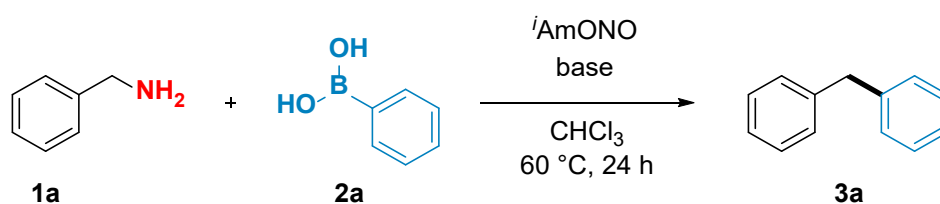

A 4 mL oven-dried glass vial equipped with a stirring bar was charged with phenylboronic acid (30.5 mg, 0.250 mmol, 1.00 equiv.) and a base (0.25 mmol, 1.00 equiv.). The vial was sealed with a septum cap and evacuated and refilled with N<sub>2</sub> three times. Anhydrous chloroform (0.60 mL) was then added followed by benzylamine (109  $\mu$ L, 1.00 mmol, 4.00 equiv.) and isoamyl nitrite (134  $\mu$ L, 1.00 mmol, 4.00 equiv.). The reaction was heated at 60 °C for 24 h. The crude reaction mixture was allowed to cool down to room temperature and analysed with GC using *n*-dodecane (25  $\mu$ L) as a standard.

| Entry | Base                            | GC yield of 3a [%] |
|-------|---------------------------------|--------------------|
| 1     | Na <sub>2</sub> CO <sub>3</sub> | 82                 |
| 2     | Li <sub>2</sub> CO <sub>3</sub> | 66                 |
| 3     | CaCO <sub>3</sub>               | 62                 |
| 4     | CS <sub>2</sub> CO <sub>3</sub> | 8                  |
| 5     | BaCO <sub>3</sub>               | 59                 |
| 6     | K <sub>2</sub> CO <sub>3</sub>  | 67                 |
| 7     | K <sub>3</sub> PO <sub>4</sub>  | 33                 |
| 8     | Na <sub>3</sub> PO <sub>4</sub> | 82                 |
| 9     | CaCl <sub>2</sub>               | 63                 |
| 10    | CaSO <sub>4</sub>               | 68                 |
| 11    | CaO                             | 68                 |
| 12    | BaO                             | 34                 |

## Solvent and temperature screen

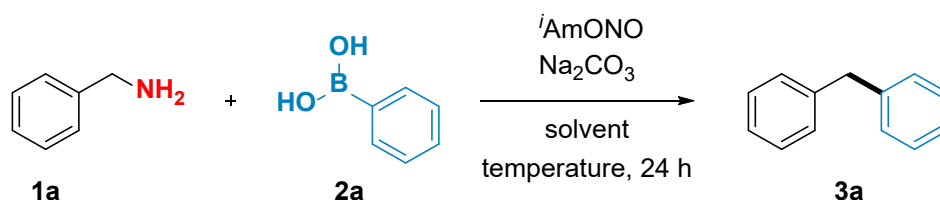

A 4 mL oven-dried glass vial equipped with a stirring bar was charged with phenylboronic acid (30.5 mg, 0.250 mmol, 1.00 equiv.) and sodium carbonate (26.5 mg, 0.500 mmol, 1.00 equiv.). The vial was sealed with a septum cap, then evacuated and refilled with N<sub>2</sub> three times. The indicated anhydrous solvent (0.60 mL) was then added followed by benzylamine (109  $\mu$ L, 1.00 mmol, 4.00 equiv.) and isoamyl nitrite (134  $\mu$ L, 1.00 mmol, 4.00 equiv.). The reaction was heated at the indicated temperature for 24 h. The crude reaction mixture was allowed to cool down to room temperature and analysed with GC using *n*-dodecane (25  $\mu$ L) as an internal standard.

| Entry | Solvent            | Temperature | GC yield of 3a [%] |
|-------|--------------------|-------------|--------------------|
| 1     | Chloroform         | 60          | 72                 |
| 2     | MeCN               | 60          | 41                 |
| 3     | PhCl               | 60          | 64                 |
| 4     | Dioxane            | 60          | 43                 |
| 5     | EtOAc              | 60          | 65                 |
| 6     | 1,2-Dichloroethane | 60          | 61                 |
| 7     | THF                | 60          | 20                 |
| 8     | Toluene            | 60          | 62                 |
| 9     | Xylene             | 60          | 61                 |
| 10    | DME                | 60          | 35                 |
| 11    | MeCN               | 80          | 64                 |
| 12    | PhCl               | 80          | 70                 |
| 13    | Dioxane            | 80          | 59                 |
| 14    | EtOAc              | 80          | 78                 |
| 15    | 1,2-Dichloroethane | 80          | 63                 |
| 16    | Toluene            | 80          | 67                 |
| 17    | Xylene             | 80          | 66                 |
| 18    | DME                | 80          | 49                 |
| 19    | PhCl               | 100         | 52                 |
| 20    | Dioxane            | 100         | 52                 |
| 21    | Toluene            | 100         | 51                 |
| 22    | Xylene             | 100         | 54                 |

### Equivalent screen

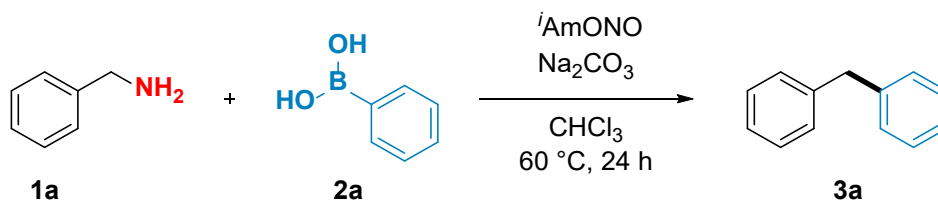

A 4 mL oven-dried glass vial equipped with a stirring bar was charged with phenylboronic acid (30.5 mg, 0.250 mmol, 1.00 equiv.) and base (0.500 mmol, 1.00 equiv.). The vial was sealed with a septum cap, then evacuated and refilled with N<sub>2</sub> three times. Anhydrous chloroform (0.60 mL) was then added followed by benzylamine (x equiv.) and isoamyl nitrite (y equiv.). The reaction was heated at 60°C for 24 h. The crude reaction mixture was allowed to cool down to room temperature and analysed with GC using *n*-dodecane (25 μL) as an internal standard.

| Entry | Benzylamine equiv. | <i>i</i> AmONO equiv. | Base                                | GC yield of 3a [%] |
|-------|--------------------|-----------------------|-------------------------------------|--------------------|
| 1     | 4.0                | 4.0                   | Na <sub>2</sub> CO <sub>3</sub>     | 82                 |
| 2     | <b>4.0</b>         | <b>5.0</b>            | <b>Na<sub>2</sub>CO<sub>3</sub></b> | <b>81</b>          |
| 3     | 4.0                | 6.0                   | Na <sub>2</sub> CO <sub>3</sub>     | 86                 |
| 4     | 3.0                | 3.75                  | Na <sub>2</sub> CO <sub>3</sub>     | 72                 |
| 5     | 3.0                | 4.5                   | Na <sub>2</sub> CO <sub>3</sub>     | 70                 |
| 6     | 4.0                | 5.0                   | Na <sub>3</sub> PO <sub>4</sub>     | 79                 |
| 7     | 4.0                | 6.0                   | Na <sub>3</sub> PO <sub>4</sub>     | 79                 |
| 8     | 3.0                | 3.75                  | Na <sub>3</sub> PO <sub>4</sub>     | 69                 |
| 9     | 3.0                | 4.5                   | Na <sub>3</sub> PO <sub>4</sub>     | 70                 |

### Control experiments

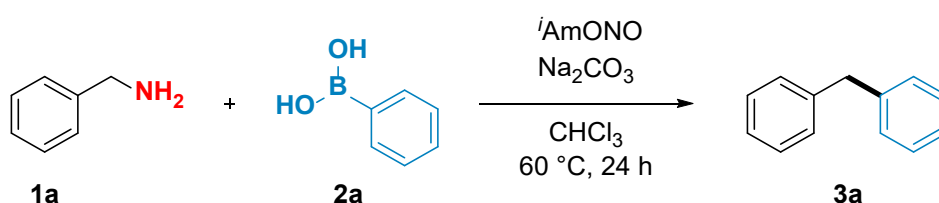

A 16 mL oven-dried glass vial equipped with a stirring bar was charged with phenylboronic acid (61 mg, 0.50 mmol, 1.00 equiv.) and sodium carbonate (53 mg, 0.50 mmol, 1.00 equiv.). The vial was sealed with a septum cap, then evacuated and refilled with N<sub>2</sub> three times. Anhydrous chloroform (1.25 mL) was then added followed by benzylamine (218 μL, 2.00 mmol, 4.00 equiv.) and isoamyl nitrite (335 μL, 2.50 mmol, 5.00 equiv.). The reaction was heated at 60°C for 24 h. The crude reaction mixture was allowed to cool down to room temperature and analysed with GC using *n*-dodecane (50 μL) as an internal standard.

| Entry | Deviation from the standard conditions                                     | GC yield of 3a [%] |
|-------|----------------------------------------------------------------------------|--------------------|
| 1     | No deviation                                                               | 80                 |
| 2     | No <i>i</i> AmONO                                                          | 0                  |
| 3     | No base                                                                    | 72                 |
| 4     | 2 equiv. of benzylamine instead of 4 equiv.                                | 58                 |
| 5     | <i>t</i> BuONO instead of <i>i</i> AmONO                                   | 23                 |
| 6     | Na <sub>3</sub> PO <sub>4</sub> instead of Na <sub>2</sub> CO <sub>3</sub> | 79                 |
| 7     | Addition of 1 equiv. B(OH) <sub>3</sub>                                    | 70                 |
| 8     | Pinacol ester instead of phenylboronic acid                                | 0                  |



### 3. Preparation of starting materials

#### 3-(*Tert*-butyl)benzonitrile

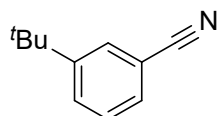

3-(*Tert*-butyl)benzonitrile was synthesised according to the modified procedure<sup>1</sup>. To a mixture of 1-bromo-3-*tert*-butylbenzene (3.41 mL, 20.0 mmol, 1.00 equiv.) and CuCN (3.58 mg, 40.0 mmol, 2.00 equiv.) in a 100 mL Schlenk flask was added *N*-methylpyrrolidone (30 mL). The mixture was heated to reflux under nitrogen atmosphere until full conversion was indicated by TLC analysis. The mixture was cooled to room temperature and aqueous NH<sub>4</sub>OH was added at 0 °C. The reaction mixture was extracted with ethyl acetate (3 x 100 mL). The combined organic phases were washed with brine, dried over anhydrous MgSO<sub>4</sub>, filtered, and evaporated under reduced pressure. The residue was purified by flash column chromatography (0 – 5% ethyl acetate in hexanes) to give 3-(*tert*-butyl)benzonitrile as a colourless oil (2.55 g, 16.0 mmol, 80% yield).

<sup>1</sup>H NMR (400 MHz, CDCl<sub>3</sub>) δ 7.70 – 7.67 (m, 1H), 7.65 (ddd, *J* = 7.9, 2.1, 1.3 Hz, 1H), 7.53 – 7.45 (m, 1H), 7.42 (td, *J* = 7.8, 0.6 Hz, 1H), 1.35 (s, 9H).

<sup>13</sup>C NMR (101 MHz, CDCl<sub>3</sub>) δ 152.60, 130.16, 129.36, 129.31, 129.01, 119.51, 112.22, 35.01, 31.16.

HRMS (ESI) *m/z*: [M]<sup>+</sup> Calculated for C<sub>11</sub>H<sub>13</sub>N<sup>+</sup> 159.1043; Found 159.1041.

#### 3-(*Tert*-butyl)benzylamine

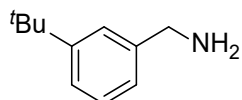

To 3-(*tert*-butyl)benzonitrile (2.55 g, 16.0 mmol, 1.00 equiv.) in anhydrous THF (40 mL) at 0 °C was added lithium aluminum hydride (1.21 g, 32.0 mmol, 2.00 equiv.) in one portion. The reaction mixture was allowed to warm to room temperature and stirred for 2 h at room temperature. The reaction was quenched with an aqueous 10% potassium hydroxide solution (1.2 mL) and water (2.4 mL). The white precipitate was filtered through celite, and the filter cake was washed with diethyl ether (3 x 40 mL). The combined filtrate was concentrated to give a pale yellow oil. The residue was purified by flash column chromatography (ethyl acetate) to give 3-*tert*-butylbenzylamine as a pale yellow oil (1.97 g, 12.0 mmol, 75% yield).

<sup>1</sup>H NMR (400 MHz, CDCl<sub>3</sub>) δ 7.39 – 7.33 (m, 1H), 7.34 – 7.27 (m, 2H), 7.22 – 7.12 (m, 1H), 3.90 (s, 2H), 1.52 (s, 2H), 1.36 (s, 9H).

<sup>13</sup>C NMR (101 MHz, CDCl<sub>3</sub>) δ 151.58, 143.06, 128.40, 124.31, 124.18, 123.94, 46.96, 34.81, 31.51.

HRMS (ESI) *m/z*: [M-H]<sup>+</sup> Calculated for C<sub>11</sub>H<sub>16</sub>N<sup>+</sup> 162.1777; Found 162.1277.

### *p*-Tolylmethan-*d*<sub>2</sub>-amine

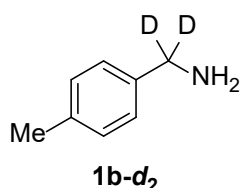

*p*-Tolylmethan-*d*<sub>2</sub>-amine was synthesised according to the modified procedure<sup>2</sup>. A 16 mL oven-dried vial was charged with lithium aluminum deuteride (98 atom % D, 523 mg, 12.5 mmol, 2.50 equiv.) and the vial was evacuated and refilled with N<sub>2</sub> three times. Anhydrous diethyl ether (6 mL) was added and the reaction mixture was cooled in an ice bath to 0 °C. 4-Methylbenzotrile (600 μL, 5.00 mmol, 1.00 equiv.) was added dropwise over 10 min. After vigorous H<sub>2</sub> gas evolution ceased, the mixture was allowed to warm to room temperature and stirred for 48 h at room temperature. The solution was diluted with 5 mL of diethyl ether, cooled to 0 °C, and quenched by the successive dropwise addition of 0.4 mL of 10% NaOH solution and 1.2 mL of water. The colourless precipitate was filtered through celite, and the filter cake was washed with diethyl ether (3 x 20 mL). The combined filtrate was concentrated to give a pale yellow oil. The resulting oil was purified by flash column chromatography (ethyl acetate) to give *p*-tolylmethan-*d*<sub>2</sub>-amine as a pale yellow oil (377 mg, 3.10 mmol, 61% yield, 98.5% deuterium incorporation).

<sup>1</sup>H NMR (600 MHz, CDCl<sub>3</sub>) δ 7.23 – 7.17 (m, 2H), 7.17 – 7.10 (m, 2H), 3.85 – 3.76 (m, 0.025H), 2.34 (s, 3H), 1.47 (s, 2H).

<sup>2</sup>H NMR (92 MHz, CDCl<sub>3</sub>) δ 3.79.

<sup>13</sup>C NMR (151 MHz, CDCl<sub>3</sub>) δ 140.48, 136.49, 129.34, 127.17, 45.71 (p, *J* = 20.4 Hz), 21.18.

HRMS (ESI) *m/z*: [M+H]<sup>+</sup> Calculated for C<sub>8</sub>H<sub>10</sub>D<sub>2</sub>N<sup>+</sup> 124.1090; Found 124.1089.

### (2-Bromo-5-fluorophenyl)(phenyl)methanol

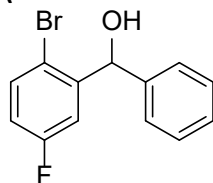

(2-Bromo-5-fluorophenyl)(phenyl)methanol was synthesised according to the modified procedure<sup>3</sup>. A solution of PhMgBr (3.0 M in diethyl ether, 5.5 mL, 16.5 mmol, 1.10 equiv.) was added dropwise to a solution of 2-bromo-5-fluorobenzaldehyde (3.04 g, 15.0 mmol, 1.00 equiv.) in anhydrous THF (37.5 mL) at 0 °C. The reaction mixture was warmed to room temperature and stirred until completion indicated by TLC (10% ethyl acetate in hexanes). The reaction mixture was quenched with saturated aqueous NH<sub>4</sub>Cl solution. The aqueous phase was extracted with diethyl ether three times. The combined organic phases were washed with brine, dried over anhydrous MgSO<sub>4</sub>, filtered and evaporated under reduced pressure. The residue was purified by flash column chromatography (0 – 10% ethyl acetate in hexanes) to give (2-bromo-5-fluorophenyl)(phenyl)methanol as a colourless oil (3.68 g, 13.1 mmol, 87% yield).

<sup>1</sup>H NMR (400 MHz, CDCl<sub>3</sub>) δ 7.50 (dd, *J* = 8.7, 5.2 Hz, 1H), 7.44 – 7.29 (m, 6H), 6.91 (ddd, *J* = 8.8, 7.7, 3.1 Hz, 1H), 6.11 (s, 1H), 2.63 (s, 1H).

**<sup>13</sup>C NMR** (101 MHz, CDCl<sub>3</sub>) δ 162.41 (d, *J* = 247.2 Hz), 144.81 (d, *J* = 6.8 Hz), 141.56, 134.12 (d, *J* = 7.8 Hz), 128.73, 128.22, 127.25, 116.55 (d, *J* = 3.2 Hz), 116.36 (d, *J* = 22.7 Hz), 115.67 (d, *J* = 24.1 Hz), 74.71 (d, *J* = 1.3 Hz).

**<sup>19</sup>F NMR** (377 MHz, CDCl<sub>3</sub>) δ -113.57.

**HRMS** (ESI) *m/z*: [M]<sup>+</sup> Calculated for C<sub>13</sub>H<sub>10</sub>BrFO<sup>+</sup> 279.9894; Found 279.9890.

### 2-Benzyl-1-bromo-4-fluorobenzene

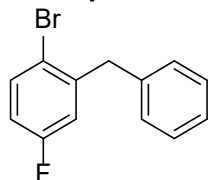

2-Benzyl-1-bromo-4-fluorobenzene was synthesised according to the modified procedure<sup>4</sup>. (2-Bromo-5-fluorophenyl)(phenyl)methanol (3.68 g, 13.1 mmol, 1.00 equiv.) was dissolved in dichloromethane (52 mL) under nitrogen atmosphere. Trifluoroacetic acid (4.00 mL, 52.4 mmol, 4.00 equiv.) was added dropwise to the reaction mixture at 0 °C. The reaction mixture was stirred for 10 min at 0 °C, and then triethylsilane (4.20 mL, 26.2 mmol, 2.00 equiv.) was added. The resulting mixture was stirred at room temperature overnight. The solvent was then removed under reduced pressure and the residue purified by flash column chromatography (hexanes) to yield 2-benzyl-1-bromo-4-fluorobenzene as a colourless oil (2.31 g, 8.73 mmol, 67% yield).

**<sup>1</sup>H NMR** (400 MHz, CDCl<sub>3</sub>) δ 7.59 – 7.49 (m, 1H), 7.38 – 7.32 (m, 2H), 7.32 – 7.23 (m, 1H), 7.25 – 7.19 (m, 2H), 6.90 – 6.78 (m, 2H), 4.11 (s, 2H).

**<sup>13</sup>C NMR** (101 MHz, CDCl<sub>3</sub>) δ 162.15 (d, *J* = 246.6 Hz), 142.78 (d, *J* = 7.3 Hz), 138.76, 133.98 (d, *J* = 8.1 Hz), 129.19, 128.79, 126.73, 118.94 (d, *J* = 3.2 Hz), 118.02 (d, *J* = 23.0 Hz), 115.17 (d, *J* = 22.4 Hz), 41.95 (d, *J* = 1.4 Hz).

**<sup>19</sup>F NMR** (377 MHz, CDCl<sub>3</sub>) δ -114.81.

**HRMS** (ESI) *m/z*: [M]<sup>+</sup> Calculated for C<sub>13</sub>H<sub>10</sub>BrF<sup>+</sup> 263.9944; Found 263.9942.

### (2-Benzyl-4-fluorophenyl)boronic acid

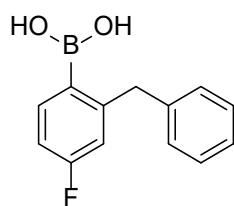

**9**

(2-Benzyl-4-fluorophenyl)boronic acid was synthesised according to the modified procedure<sup>5</sup>. *n*-BuLi (1.6 M in hexanes, 3.50 mL, 5.60 mmol, 1.10 equiv.) was added dropwise to a solution of 2-benzyl-1-bromo-4-fluorobenzene (1.36 g, 5.10 mmol, 1.00 equiv.) in anhydrous THF (128 mL) at -78 °C under nitrogen atmosphere. The reaction mixture was stirred for 45 minutes, while the temperature was allowed to slowly rise to -50 °C. The reaction mixture was then cooled again to -78 °C and trimethyl borate (5.40 mL, 48.6 mmol, 9.50 equiv.) was added. The resulting solution was allowed to warm slowly to room temperature and stirred overnight. Distilled water was added to the reaction mixture and the resulting solution was acidified with 1M HCl solution. The aqueous phase was extracted with

ethyl acetate three times. The combined organic phases were washed with brine, dried over anhydrous  $\text{MgSO}_4$ , filtered, and concentrated under reduced pressure. The residue was purified by recrystallisation from pentane to give (2-benzyl-4-fluorophenyl)boronic acid as a white solid (0.74 g, 3.20 mmol, 63% yield).

$^1\text{H NMR}$  (400 MHz, Acetone)  $\delta$  7.67 (dd,  $J = 8.3, 6.8$  Hz, 1H), 7.28 – 7.18 (m, 4H), 7.18 – 7.08 (m, 1H), 6.87 (td,  $J = 8.6, 2.6$  Hz, 1H), 6.80 (dd,  $J = 10.9, 2.6$  Hz, 1H), 4.29 (s, 2H).

$^{13}\text{C NMR}$  (101 MHz,  $\text{CDCl}_3$ )  $\delta$  164.42 (d,  $J = 245.7$  Hz), 150.28 (d,  $J = 6.9$  Hz), 142.62, 137.39 (d,  $J = 8.0$  Hz), 129.69, 129.05, 126.56, 116.53 (d,  $J = 20.1$  Hz), 112.46 (d,  $J = 19.7$  Hz), 41.18 (d,  $J = 1.8$  Hz).

$^{19}\text{F NMR}$  (377 MHz, Acetone)  $\delta$  -113.74.

HRMS data could not be obtained due to the instability of the compound.

### 1-Bromo-4-(*tert*-butyl)benzene-2,6- $d_2$

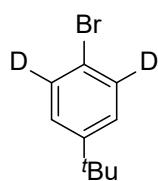

1-Bromo-4-(*tert*-butyl)benzene-2,6- $d_2$  was synthesised according to the previously reported procedure<sup>6</sup>. 1-Bromo-4-(*tert*-butyl)benzene (1.73 mL, 10.00 mmol, 1.00 equiv.) was added to a vigorously stirred solution of silver carbonate (551 mg, 2.00 mmol, 0.20 equiv.), cyclohexyldiphenylphosphine (1.3 g, 5.0 mmol, 0.50 equiv.), potassium carbonate (1.87 g, 10.0 mmol, 1.00 equiv.), and  $\text{D}_2\text{O}$  (3.60 mL, 200 mmol, 20.0 equiv.) in toluene (1 mL) under nitrogen atmosphere. The reaction mixture was stirred at 120 °C for 24 h. After allowing the reaction to cool to room temperature, the reaction was quenched with saturated aqueous  $\text{NH}_4\text{Cl}$  solution and the aqueous phase was extracted with dichloromethane three times. The combined organic phases were washed with brine, dried over anhydrous  $\text{MgSO}_4$ , filtered and concentrated under reduced pressure. The residue was purified by flash column chromatography (hexanes) to give 1-bromo-4-(*tert*-butyl)benzene-2,6- $d_2$  as a colourless oil (1.83 g, 8.50 mmol, 85% yield).

$^1\text{H NMR}$  (600 MHz, DMSO)  $\delta$  7.48 – 7.44 (m, 0.22H, 89% deuterium incorporation), 7.36 – 7.32 (m, 1.66H, 12% deuterium incorporation), 1.25 (s, 9H).

$^2\text{H NMR}$  (92 MHz, DMSO)  $\delta$  7.48, 7.36.

$^{13}\text{C NMR}$  (151 MHz, DMSO)  $\delta$  150.03, 149.96 (minor), 130.79 (minor), 130.73 – 130.27 (m), 127.56 (minor), 127.44, 118.40 (minor), 118.29, 34.28, 30.90.

HRMS (ESI)  $m/z$ :  $[\text{M}]^+$  Calculated for  $\text{C}_{10}\text{H}_{11}\text{D}_2\text{Br}^+$  214.0321; Found 214.0322.

### (4-(*Tert*-butyl)phenyl-2,6- $d_2$ )boronic acid

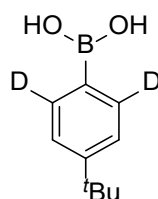

(4-(*Tert*-butyl)phenyl-2,6- $d_2$ )boronic acid was synthesised according to the modified procedure<sup>5</sup>. *n*-BuLi (1.6 M in hexanes, 5.8 mL, 9.4 mmol, 1.1 equiv.) was added dropwise to a solution of 1-bromo-4-(*tert*-butyl)benzene-2,6- $d_2$  (1.83 g, 8.50 mmol, 1.00 equiv.) in dry THF (85 mL) at -78 °C under nitrogen atmosphere. The reaction mixture was stirred for 45 minutes, while the temperature was allowed to slowly rise to -50 °C. Then the reaction mixture was cooled down to -78 °C and trimethyl borate (2.80 mL, 25.5 mmol, 3.00 equiv.) was added. The resulting solution was allowed to warm slowly to room temperature and was stirred at room temperature overnight. Distilled water was added to the reaction mixture and the resulting solution was acidified with 1M HCl solution. The aqueous phase was extracted with ethyl acetate three times. The combined organic phases were washed with brine, dried over anhydrous MgSO<sub>4</sub>, filtered and concentrated under reduced pressure. The residue was purified by recrystallisation from pentane to give (4-(*tert*-butyl)phenyl-2,6- $d_2$ )boronic acid as a white solid (0.89 g, 4.9 mmol, 58% yield).

<sup>1</sup>H NMR (600 MHz, Acetone) δ 7.78 – 7.75 (m, 0.24H, 88% deuterium incorporation), 7.36 – 7.34 (m, 1.78H, 11% deuterium incorporation), 1.26 (s, 9H).

<sup>2</sup>H NMR (92 MHz, Acetone) δ 7.78, 7.36.

<sup>13</sup>C NMR (151 MHz, Acetone) δ 150.54, 150.47 (minor), 131.57 (minor), 131.49 – 130.92 (m), 127.52, 121.73 (minor), 121.61, 31.71, 28.08.

HRMS (ESI) *m/z*: [M+Na]<sup>+</sup> Calculated for C<sub>10</sub>H<sub>13</sub>D<sub>2</sub>BNaO<sub>2</sub><sup>+</sup> 203.1183; Found 203.1185.

## 4. Benzylamine substrate scope

### General procedure A for benzylamine scope

A 16 mL oven-dried glass vial equipped with a stirring bar was charged with phenylboronic acid (61 mg, 0.50 mmol, 1.00 equiv.), sodium carbonate (53 mg, 0.50 mmol, 1.00 equiv.) and the corresponding benzylamine (if solid, 2.00 mmol, 4.00 equiv). The vial was sealed with a septum cap and evacuated and refilled with N<sub>2</sub> three times. Anhydrous chloroform (1.25 mL) was then added followed by the corresponding benzylamine (if liquid, 2.00 mmol, 4.00 equiv.) and isoamyl nitrite (335  $\mu$ L, 2.50 mmol, 5.00 equiv.). The reaction was heated at 60°C for 24 h. The crude reaction mixture was allowed to cool down to room temperature, concentrated and purified by flash column chromatography.

### Diphenylmethane

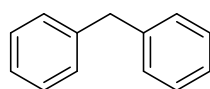

**3a**

Diphenylmethane was prepared according to the general procedure A using benzylamine (219  $\mu$ L, 2.00 mmol). Flash column chromatography (hexanes) of the crude reaction mixture afforded the product as a colourless oil (59 mg, 0.35 mmol, 70% yield).

**<sup>1</sup>H NMR** (400 MHz, CDCl<sub>3</sub>)  $\delta$  7.36 – 7.29 (m, 4H), 7.29 – 7.23 (m, 6H), 4.08 (s, 2H).

**<sup>13</sup>C NMR** (101 MHz, CDCl<sub>3</sub>)  $\delta$  141.26, 129.08, 128.60, 126.21, 42.09.

**HRMS** (ESI) m/z: [M]<sup>+</sup> Calculated for C<sub>13</sub>H<sub>12</sub><sup>+</sup> 168.0934; Found 168.0931.

The spectral data are consistent with those reported in the literature<sup>7</sup>.

### 1-Benzyl-4-methylbenzene

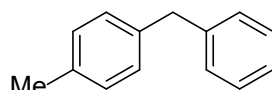

**3b**

1-Benzyl-4-methylbenzene was prepared according to the general procedure A using 4-methylbenzylamine (255  $\mu$ L, 2.00 mmol). Flash column chromatography (hexanes) of the crude reaction mixture afforded the product as a colourless oil (54 mg, 0.30 mmol, 59% yield).

**<sup>1</sup>H NMR** (400 MHz, CDCl<sub>3</sub>)  $\delta$  7.38 – 7.31 (m, 2H), 7.31 – 7.22 (m, 3H), 7.21 – 7.15 (m, 4H), 4.03 (s, 2H), 2.40 (s, 3H).

**<sup>13</sup>C NMR** (101 MHz, CDCl<sub>3</sub>)  $\delta$  141.55, 138.21, 135.66, 129.28, 129.01, 128.95, 128.56, 126.11, 41.65, 21.14.

**HRMS** (ESI) m/z: [M]<sup>+</sup> Calculated for C<sub>14</sub>H<sub>14</sub><sup>+</sup> 182.1090; Found 182.1086.

The spectral data are consistent with those reported in the literature<sup>8</sup>.

### 1-Benzyl-4-(*tert*-butyl)benzene

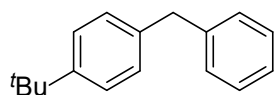

**3c**

1-Benzyl-4-(*tert*-butyl)benzene was prepared according to the general procedure A using 4-*tert*-butylbenzylamine (352  $\mu$ L, 2.00 mmol). Flash column chromatography (hexanes) of the crude reaction mixture afforded the product as a colourless oil (57 mg, 0.25 mmol, 51% yield).

$^1\text{H NMR}$  (400 MHz,  $\text{CDCl}_3$ )  $\delta$  7.41 – 7.32 (m, 4H), 7.31 – 7.24 (m, 3H), 7.22 – 7.17 (m, 2H), 4.02 (s, 2H), 1.37 (s, 9H).

$^{13}\text{C NMR}$  (101 MHz,  $\text{CDCl}_3$ )  $\delta$  148.97, 141.43, 138.22, 129.11, 128.65, 128.57, 126.14, 125.49, 41.58, 34.51, 31.54.

**HRMS** (ESI)  $m/z$ :  $[\text{M}]^+$  Calculated for  $\text{C}_{17}\text{H}_{20}^+$  224.1560; Found 224.1558.

The spectral data are consistent with those reported in the literature<sup>8</sup>.

### 4-Benzyl-1,1'-biphenyl

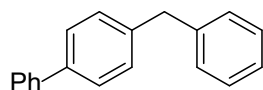

**3d**

4-Benzyl-1,1'-biphenyl was prepared according to the general procedure A using [1,1'-biphenyl]-4-ylmethanamine (367 mg, 2.00 mmol). Flash column chromatography (hexanes) of the crude reaction mixture afforded the product as a white solid (72 mg, 0.30 mmol, 60% yield).

$^1\text{H NMR}$  (400 MHz,  $\text{CDCl}_3$ )  $\delta$  7.67 – 7.60 (m, 2H), 7.59 – 7.53 (m, 2H), 7.52 – 7.21 (m, 10H), 4.07 (s, 2H).

$^{13}\text{C NMR}$  (101 MHz,  $\text{CDCl}_3$ )  $\delta$  141.15, 141.15, 140.39, 139.19, 129.46, 129.11, 128.86, 128.66, 127.35, 127.22, 127.15, 126.29, 41.73.

**HRMS** (ESI)  $m/z$ :  $[\text{M}]^+$  Calculated for  $\text{C}_{19}\text{H}_{16}^+$  244.1247; Found 244.1242.

The spectral data are consistent with those reported in the literature<sup>9</sup>.

### 1-Benzyl-4-fluorobenzene

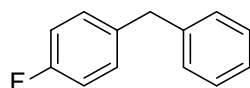

**3e**

1-Benzyl-4-fluorobenzene was prepared according to the general procedure A using 4-fluorobenzylamine (229  $\mu$ L, 2.00 mmol). Flash column chromatography (hexanes) of the crude reaction mixture afforded the product as a colourless oil (47 mg, 0.25 mmol, 51% yield).

$^1\text{H NMR}$  (400 MHz,  $\text{CDCl}_3$ )  $\delta$  7.39 – 7.31 (m, 2H), 7.30 – 7.25 (m, 1H), 7.25 – 7.14 (m, 4H), 7.08 – 6.97 (m, 2H), 4.01 (s, 2H).

**<sup>13</sup>C NMR** (101 MHz, CDCl<sub>3</sub>) δ 161.56 (d, *J* = 244.0 Hz), 141.08 (d, *J* = 0.9 Hz), 136.91 (d, *J* = 3.2 Hz), 130.42 (d, *J* = 7.8 Hz), 128.97, 128.67, 126.34, 115.34 (d, *J* = 21.2 Hz), 41.21.

**<sup>19</sup>F NMR** (377 MHz, CDCl<sub>3</sub>) δ -117.31.

**HRMS** (ESI) *m/z*: [M]<sup>+</sup> Calculated for C<sub>13</sub>H<sub>11</sub>F<sup>+</sup> 186.0839; Found 186.0835.

The spectral data are consistent with those reported in the literature<sup>8</sup>.

### 1-Benzyl-4-chlorobenzene

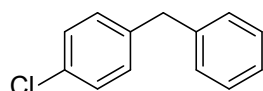

**3f**

1-Benzyl-4-chlorobenzene was prepared according to the general procedure A using 4-chlorobenzylamine (243 μL, 2.00 mmol). Flash column chromatography (hexanes) of the crude reaction mixture afforded the product as a colourless oil (77 mg, 0.38 mmol, 76% yield).

**<sup>1</sup>H NMR** (400 MHz, CDCl<sub>3</sub>) δ 7.39 – 7.34 (m, 2H), 7.34 – 7.26 (m, 3H), 7.26 – 7.22 (m, 2H), 7.21 – 7.15 (m, 2H), 4.02 (s, 2H).

**<sup>13</sup>C NMR** (101 MHz, CDCl<sub>3</sub>) δ 140.68, 139.71, 132.02, 130.38, 128.99, 128.70, 128.69, 126.42, 41.36.

**HRMS** (ESI) *m/z*: [M]<sup>+</sup> Calculated for C<sub>13</sub>H<sub>11</sub>Cl<sup>+</sup> 202.0544; Found 202.0542.

The spectral data are consistent with those reported in the literature<sup>8</sup>.

### 1-Benzyl-4-bromobenzene

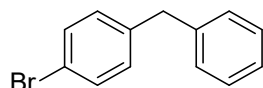

**3g**

1-Benzyl-4-bromobenzene was prepared according to the general procedure A using 4-bromobenzylamine (253 μL, 2.00 mmol). Flash column chromatography (hexanes) of the crude reaction mixture afforded the product as a colourless oil (105 mg, 0.43 mmol, 85% yield).

**<sup>1</sup>H NMR** (400 MHz, CDCl<sub>3</sub>) δ 7.52 – 7.44 (m, 2H), 7.42 – 7.34 (m, 2H), 7.34 – 7.27 (m, 1H), 7.26 – 7.21 (m, 2H), 7.17 – 7.07 (m, 2H), 4.00 (s, 2H).

**<sup>13</sup>C NMR** (101 MHz, CDCl<sub>3</sub>) δ 140.55, 140.21, 131.63, 130.78, 128.98, 128.69, 126.42, 120.06, 41.41.

**HRMS** (ESI) *m/z*: [M]<sup>+</sup> Calculated for C<sub>13</sub>H<sub>11</sub>Br<sup>+</sup> 246.0039; Found 246.0035.

The spectral data are consistent with those reported in the literature<sup>8</sup>.

### 1-Benzyl-4-iodobenzene

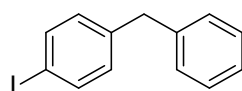

**3h**



1-Benzyl-4-iodobenzene was prepared according to the general procedure A using 4-iodobenzylamine (466 mg, 2.00 mmol). Flash column chromatography (hexanes) of the crude reaction mixture afforded the product as a light-sensitive colourless oil that turns light purple upon light exposure (131 mg, 0.44 mmol, 89% yield).

**<sup>1</sup>H NMR** (400 MHz, CDCl<sub>3</sub>) δ 7.69 – 7.65 (m, 2H), 7.42 – 7.33 (m, 2H), 7.33 – 7.27 (m, 1H), 7.28 – 7.19 (m, 2H), 7.07 – 6.98 (m, 2H), 3.99 (s, 2H).

**<sup>13</sup>C NMR** (101 MHz, CDCl<sub>3</sub>) δ 140.86, 140.47, 137.58, 131.11, 128.96, 128.67, 126.40, 91.45, 41.50.

**HRMS** (ESI) m/z: [M]<sup>+</sup> Calculated for C<sub>13</sub>H<sub>11</sub>I<sup>+</sup> 293.9900; Found 293.9895.

The spectral data are consistent with those reported in the literature<sup>10</sup>.

#### 4-Benzylbenzotrile

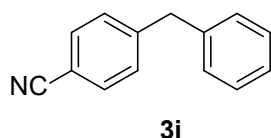

4-Benzylbenzotrile was prepared according to the general procedure A using 4-(aminomethyl)benzotrile (238 μL, 2.00 mmol). Flash column chromatography (0–60% CH<sub>2</sub>Cl<sub>2</sub> in hexanes) of the crude reaction mixture afforded the product as a colourless oil (88 mg, 0.46 mmol, 91% yield).

**<sup>1</sup>H NMR** (400 MHz, CDCl<sub>3</sub>) δ 7.64 – 7.56 (m, 2H), 7.43 – 7.25 (m, 5H), 7.25 – 7.16 (m, 2H), 4.07 (s, 2H).

**<sup>13</sup>C NMR** (101 MHz, CDCl<sub>3</sub>) δ 146.76, 139.37, 132.28, 129.65, 128.98, 128.78, 126.68, 119.01, 110.01, 41.96.

**HRMS** (ESI) m/z: [M]<sup>+</sup> Calculated for C<sub>14</sub>H<sub>11</sub>N<sup>+</sup> 193.0886; Found 193.0882.

The spectral data are consistent with those reported in the literature<sup>11</sup>.

#### 1-Benzyl-4-nitrobenzene

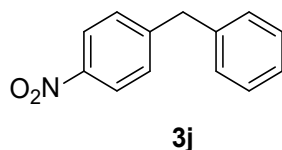

1-Benzyl-4-nitrobenzene was prepared according to the general procedure A using 4-nitrobenzylamine (304 mg, 2.00 mmol). Flash column chromatography (0–40% CH<sub>2</sub>Cl<sub>2</sub> in hexanes) of the crude reaction mixture afforded the product as a colourless oil (61 mg, 0.29 mmol, 57% yield).

**<sup>1</sup>H NMR** (400 MHz, CDCl<sub>3</sub>) δ 8.21 – 8.12 (m, 2H), 7.42 – 7.32 (m, 4H), 7.32 – 7.25 (m, 1H), 7.25 – 7.17 (m, 2H), 4.11 (s, 2H).

**<sup>13</sup>C NMR** (101 MHz, CDCl<sub>3</sub>) δ 148.99, 146.61, 139.30, 129.75, 129.06, 128.92, 126.85, 123.84, 41.82.

**HRMS** (ESI) m/z: [M]<sup>+</sup> Calculated for C<sub>13</sub>H<sub>11</sub>NO<sub>2</sub><sup>+</sup> 213.0784; Found 213.0781.

The spectral data are consistent with those reported in the literature<sup>12</sup>.

### Methyl 4-benzylbenzoate

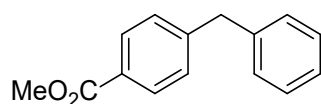

**3k**

Methyl 4-benzylbenzoate was prepared according to the general procedure A using methyl 4-(aminomethyl)benzoate (330 mg, 2.00 mmol). Flash column chromatography (0–50% CH<sub>2</sub>Cl<sub>2</sub> in hexanes) of the crude reaction mixture afforded the product as a colourless oil (99 mg, 0.44 mmol, 88% yield).

**<sup>1</sup>H NMR** (400 MHz, CDCl<sub>3</sub>) δ 8.04 – 7.99 (m, 2H), 7.39 – 7.20 (m, 7H), 4.07 (s, 2H), 3.94 (s, 3H).

**<sup>13</sup>C NMR** (101 MHz, CDCl<sub>3</sub>) δ 167.10, 146.60, 140.19, 129.90, 129.02, 129.02, 128.68, 128.18, 126.45, 52.05, 41.98.

**HRMS** (ESI) m/z: [M]<sup>+</sup> Calculated for C<sub>15</sub>H<sub>14</sub>O<sub>2</sub><sup>+</sup> 226.0988; Found 226.0987.

The spectral data are consistent with those reported in the literature<sup>12</sup>.

### 1-Benzyl-4-(methylsulfonyl)benzene

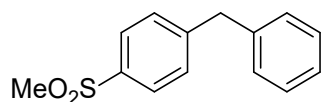

**3l**

1-Benzyl-4-(methylsulfonyl)benzene was prepared according to the general procedure A using methyl 4-(methylsulfonyl)benzylamine (371 mg, 2.00 mmol). Flash column chromatography (0–100% CH<sub>2</sub>Cl<sub>2</sub> in hexanes) of the crude reaction mixture afforded the product as a white solid (115 mg, 0.47 mmol, 93% yield).

**<sup>1</sup>H NMR** (400 MHz, CDCl<sub>3</sub>) δ 7.96 – 7.78 (m, 2H), 7.44 – 7.38 (m, 2H), 7.37 – 7.31 (m, 2H), 7.30 – 7.24 (m, 1H), 7.23 – 7.17 (m, 2H), 4.09 (s, 2H), 3.05 (s, 3H).

**<sup>13</sup>C NMR** (101 MHz, CDCl<sub>3</sub>) δ 147.73, 139.44, 138.40, 129.82, 128.99, 128.79, 127.64, 126.70, 44.59, 41.83.

**HRMS** (ESI) m/z: [M]<sup>+</sup> Calculated for C<sub>14</sub>H<sub>11</sub>O<sub>2</sub>S<sup>+</sup> 246.0709; Found 246.0705.

The spectral data are consistent with those reported in the literature<sup>13</sup>.

### 1-Benzyl-4-(trifluoromethoxy)benzene

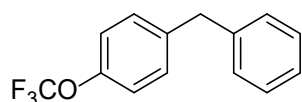

**3m**

1-Benzyl-4-(trifluoromethoxy)benzene was prepared according to the general procedure A using 4-trifluoromethoxybenzylamine (305 μL, 2.00 mmol). Flash column chromatography (hexanes) of the crude reaction mixture afforded the product as a colourless oil (85 mg, 0.34 mmol, 68% yield).

**<sup>1</sup>H NMR** (400 MHz, CDCl<sub>3</sub>) δ 7.40 – 7.34 (m, 2H), 7.33 – 7.23 (m, 5H), 7.22 – 7.17 (m, 2H), 4.05 (s, 2H).  
**<sup>13</sup>C NMR** (101 MHz, CDCl<sub>3</sub>) δ 147.75, 140.58, 140.04, 130.27, 129.05, 128.76, 126.51, 121.16, 120.68 (q, *J* = 256.9 Hz), 41.34.  
**<sup>19</sup>F NMR** (377 MHz, CDCl<sub>3</sub>) δ -57.77.  
**HRMS** (ESI) *m/z*: [M]<sup>+</sup> Calculated for C<sub>14</sub>H<sub>11</sub>F<sub>3</sub>O<sup>+</sup> 252.0757; Found 252.0752.

The spectral data are consistent with those reported in the literature<sup>8</sup>.

### 1-Benzyl-4-(difluoromethoxy)benzene

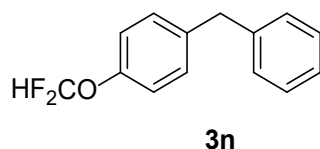

1-Benzyl-4-(difluoromethoxy)benzene was prepared according to the general procedure A using 4-difluoromethoxybenzylamine (281 μL, 2.00 mmol). Flash column chromatography (hexanes) of the crude reaction mixture afforded the product as a colourless oil (66 mg, 0.28 mmol, 56% yield).

**<sup>1</sup>H NMR** (400 MHz, CDCl<sub>3</sub>) δ 7.40 – 7.32 (m, 2H), 7.32 – 7.27 (m, 1H), 7.27 – 7.20 (m, 4H), 7.15 – 7.03 (m, 2H), 6.52 (t, *J* = 74.2 Hz, 1H), 4.03 (s, 2H).  
**<sup>13</sup>C NMR** (101 MHz, CDCl<sub>3</sub>) δ 149.69 (t, *J* = 2.8 Hz), 140.85, 138.57, 130.32, 129.00, 128.71, 126.41, 119.76 (d, *J* = 0.9 Hz), 116.19 (t, *J* = 259.3 Hz), 41.29.  
**<sup>19</sup>F NMR** (377 MHz, CDCl<sub>3</sub>) δ -80.39.  
**HRMS** (ESI) *m/z*: [M]<sup>+</sup> Calculated for C<sub>14</sub>H<sub>12</sub>F<sub>2</sub>O<sup>+</sup> 234.0851; Found 234.0846.

The spectral data are consistent with those reported in the literature<sup>14</sup>.

### (4-Benzylphenyl)(trifluoromethyl)sulfane

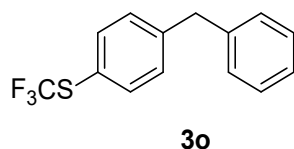

(4-Benzylphenyl)(trifluoromethyl)sulfane was prepared according to the general procedure A using 4-(trifluoromethylthio)benzylamine (316 μL, 2.00 mmol). Flash column chromatography (hexanes) of the crude reaction mixture afforded the product as a colourless oil (114 mg, 0.43 mmol, 85% yield).

**<sup>1</sup>H NMR** (400 MHz, CDCl<sub>3</sub>) δ 7.67 – 7.62 (m, 2H), 7.42 – 7.36 (m, 2H), 7.34 – 7.28 (m, 3H), 7.28 – 7.23 (m, 2H), 4.08 (s, 2H).  
**<sup>13</sup>C NMR** (101 MHz, CDCl<sub>3</sub>) δ 144.62, 140.09, 136.68, 130.17, 129.81 (q, *J* = 308.0 Hz), 129.13, 128.81, 126.62, 121.90 (q, *J* = 2.1 Hz), 41.76.  
**<sup>19</sup>F NMR** (377 MHz, CDCl<sub>3</sub>) δ -42.83.  
**HRMS** (ESI) *m/z*: [M]<sup>+</sup> Calculated for C<sub>14</sub>H<sub>11</sub>F<sub>3</sub>S<sup>+</sup> 268.0528; Found 268.0524.

### 1-Benzyl-4-(trifluoromethyl)benzene

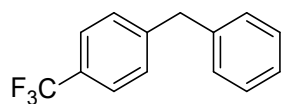

**3p**

1-Benzyl-4-(trifluoromethyl)benzene was prepared according to the general procedure A using 4-trifluoromethylbenzylamine (285  $\mu$ L, 2.00 mmol). Flash column chromatography (hexanes) of the crude reaction mixture afforded the product as a colourless oil (103 mg, 0.44 mmol, 87% yield).

**$^1\text{H}$  NMR** (400 MHz,  $\text{CDCl}_3$ )  $\delta$  7.63 (d,  $J$  = 8.1 Hz, 2H), 7.45 – 7.36 (m, 4H), 7.36 – 7.30 (m, 1H), 7.30 – 7.25 (m, 2H), 4.12 (s, 2H).

**$^{13}\text{C}$  NMR** (101 MHz,  $\text{CDCl}_3$ )  $\delta$  145.73 – 145.09 (m), 140.14, 129.34, 129.09, 128.82, 128.63 (q,  $J$  = 32.3 Hz) 126.63, 125.54 (q,  $J$  = 3.8 Hz), 124.50 (q,  $J$  = 271.9 Hz), 41.85.

**$^{19}\text{F}$  NMR** (377 MHz,  $\text{CDCl}_3$ )  $\delta$  -62.16.

**HRMS** (ESI)  $m/z$ :  $[\text{M}]^+$  Calculated for  $\text{C}_{14}\text{H}_{11}\text{F}_3^+$  236.0807; Found 236.0804.

The spectral data are consistent with those reported in the literature<sup>8</sup>.

### 1-Benzyl-3-methylbenzene

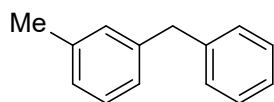

**3q**

1-Benzyl-3-methylbenzene was prepared according to the general procedure A using 3-methylbenzylamine (251  $\mu$ L, 2.00 mmol). Flash column chromatography (hexanes) of the crude reaction mixture afforded the product as a colourless oil (56 mg, 0.31 mmol, 62% yield).

**$^1\text{H}$  NMR** (400 MHz,  $\text{CDCl}_3$ )  $\delta$  7.39 – 7.32 (m, 2H), 7.33 – 7.22 (m, 4H), 7.15 – 7.03 (m, 3H), 4.03 (s, 2H), 2.40 (s, 3H).

**$^{13}\text{C}$  NMR** (101 MHz,  $\text{CDCl}_3$ )  $\delta$  141.39, 141.16, 138.16, 129.85, 129.06, 128.57, 128.48, 126.96, 126.15, 126.12, 42.03, 21.54.

**HRMS** (ESI)  $m/z$ :  $[\text{M}]^+$  Calculated for  $\text{C}_{14}\text{H}_{14}^+$  182.1090; Found 182.1086.

The spectral data are consistent with those reported in the literature<sup>10</sup>.

### 1-Benzyl-3-(*tert*-butyl)benzene

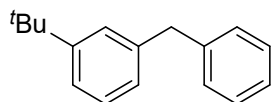

**3r**

1-Benzyl-3-(*tert*-butyl)benzene was prepared according to the general procedure A using 3-(*tert*-butyl)benzylamine (327 mg, 2.00 mmol). Flash column chromatography (hexanes) of the crude reaction mixture afforded the product as a colourless oil (79.4 mg, 0.35 mmol, 71% yield).

**<sup>1</sup>H NMR** (400 MHz, CDCl<sub>3</sub>) δ 7.43 – 7.27 (m, 8H), 7.13 – 7.05 (m, 1H), 4.11 (s, 2H), 1.43 (s, 9H).

**<sup>13</sup>C NMR** (101 MHz, CDCl<sub>3</sub>) δ 151.39, 141.43, 140.75, 129.05, 128.55, 128.28, 126.18, 126.16, 126.11, 123.16, 42.33, 34.75, 31.53.

**HRMS** (ESI) m/z: [M]<sup>+</sup> Calculated for C<sub>17</sub>H<sub>20</sub><sup>+</sup> 224.1560; Found 224.1558.

The spectral data are consistent with those reported in the literature<sup>15</sup>.

### 3-Benzyl-1,1'-biphenyl

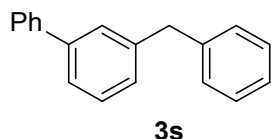

3-Benzyl-1,1'-biphenyl was prepared according to the general procedure A using [1,1'-biphenyl]-3-ylmethanamine (367 mg, 2.00 mmol). Flash column chromatography (hexanes) of the crude reaction mixture afforded the product as a colourless oil (92 mg, 0.38 mmol, 75% yield).

**<sup>1</sup>H NMR** (400 MHz, CDCl<sub>3</sub>) δ 7.58 – 7.52 (m, 2H), 7.45 – 7.36 (m, 4H), 7.35 – 7.24 (m, 4H), 7.24 – 7.10 (m, 4H), 4.02 (s, 2H).

**<sup>13</sup>C NMR** (101 MHz, CDCl<sub>3</sub>) δ 141.71, 141.54, 141.34, 141.10, 129.07, 129.01, 128.83, 128.63, 128.03, 127.95, 127.34, 127.31, 126.26, 125.12, 42.15.

**HRMS** (ESI) m/z: [M]<sup>+</sup> Calculated for C<sub>19</sub>H<sub>16</sub><sup>+</sup> 244.1247; Found 224.1243.

The spectral data are consistent with those reported in the literature<sup>16</sup>.

### 1-Benzyl-3-fluorobenzene

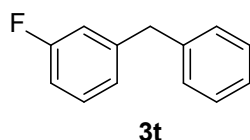

1-Benzyl-3-fluorobenzene was prepared according to the general procedure A using 3-fluorobenzylamine (228 μL, 2.00 mmol). Flash column chromatography (hexanes) of the crude reaction mixture afforded the product as a colourless oil (73 mg, 0.39 mmol, 79% yield).

**<sup>1</sup>H NMR** (400 MHz, CDCl<sub>3</sub>) δ 7.41 – 7.35 (m, 2H), 7.35 – 7.23 (m, 4H), 7.10 – 7.02 (m, 1H), 7.02 – 6.93 (m, 2H), 4.05 (s, 2H).

**<sup>13</sup>C NMR** (101 MHz, CDCl<sub>3</sub>) δ 163.11 (d, *J* = 245.6 Hz), 143.82 (d, *J* = 7.2 Hz), 140.42, 129.96 (d, *J* = 8.3 Hz), 129.06, 128.72, 126.48, 124.67 (d, *J* = 2.8 Hz), 115.91 (d, *J* = 21.2 Hz), 113.11 (d, *J* = 21.1 Hz), 41.76.

**<sup>19</sup>F NMR** (377 MHz, CDCl<sub>3</sub>) δ -113.41.

**HRMS** (ESI) m/z: [M]<sup>+</sup> Calculated for C<sub>13</sub>H<sub>11</sub>F<sup>+</sup> 186.0839; Found 186.0835.

The spectral data are consistent with those reported in the literature<sup>10</sup>.

### 1-Benzyl-3-chlorobenzene

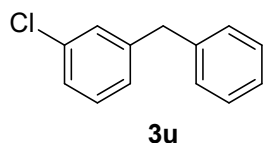

1-Benzyl-3-chlorobenzene was prepared according to the general procedure A using 3-chlorobenzylamine (244  $\mu\text{L}$ , 2.00 mmol). Flash column chromatography (hexanes) of the crude reaction mixture afforded the product as a colourless oil (91 mg, 0.45 mmol, 89% yield).

$^1\text{H NMR}$  (400 MHz,  $\text{CDCl}_3$ )  $\delta$  7.40 – 7.33 (m, 2H), 7.33 – 7.21 (m, 6H), 7.18 – 7.10 (m, 1H), 4.02 (s, 2H).

$^{13}\text{C NMR}$  (101 MHz,  $\text{CDCl}_3$ )  $\delta$  143.28, 140.31, 134.38, 129.81, 129.14, 129.05, 128.73, 127.23, 126.50, 126.43, 41.69.

**HRMS** (ESI)  $m/z$ :  $[\text{M}]^+$  Calculated for  $\text{C}_{13}\text{H}_{11}\text{Cl}^+$  202.0544; Found 202.0544.

The spectral data are consistent with those reported in the literature<sup>10</sup>.

### 1-Benzyl-3-bromobenzene

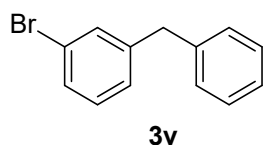

1-Benzyl-3-bromobenzene was prepared according to the general procedure A using 3-bromobenzylamine (251  $\mu\text{L}$ , 2.00 mmol). Flash column chromatography (hexanes) of the crude reaction mixture afforded the product as a colourless oil (99 mg, 0.40 mmol, 80% yield).

$^1\text{H NMR}$  (400 MHz,  $\text{CDCl}_3$ )  $\delta$  7.42 – 7.33 (m, 4H), 7.33 – 7.14 (m, 5H), 4.01 (s, 2H).

$^{13}\text{C NMR}$  (101 MHz,  $\text{CDCl}_3$ )  $\delta$  143.57, 140.28, 132.04, 130.12, 129.35, 129.04, 128.73, 127.69, 126.50, 122.69, 41.65.

**HRMS** (ESI)  $m/z$ :  $[\text{M}]^+$  Calculated for  $\text{C}_{13}\text{H}_{11}\text{Br}^+$  246.0039; Found 246.0035.

The spectral data are consistent with those reported in the literature<sup>10</sup>.

### 1-Benzyl-3-iodobenzene

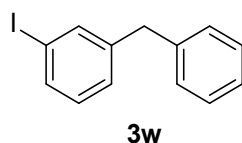

1-Benzyl-3-iodobenzene was prepared according to the general procedure A using 3-iodobenzylamine (266  $\mu\text{L}$ , 2.00 mmol). Flash column chromatography (hexanes) of the crude reaction mixture afforded the product as a colourless oil (127 mg, 0.43 mmol, 87% yield).

$^1\text{H NMR}$  (400 MHz,  $\text{CDCl}_3$ )  $\delta$  7.72 – 7.52 (m, 2H), 7.42 – 7.32 (m, 2H), 7.31 – 7.26 (m, 1H), 7.26 – 7.17 (m, 3H), 7.07 (t,  $J = 7.7$  Hz, 1H), 3.98 (s, 2H).

**<sup>13</sup>C NMR** (101 MHz, CDCl<sub>3</sub>) δ 143.63, 140.29, 137.96, 135.31, 130.30, 129.01, 128.71, 128.33, 126.47, 94.74, 41.54.

**HRMS** (ESI) m/z: [M]<sup>+</sup> Calculated for C<sub>13</sub>H<sub>11</sub><sup>+</sup> 293.9900; Found 293.9894.

The spectral data are consistent with those reported in the literature<sup>17</sup>.

### 3-Benzylbenzonitrile

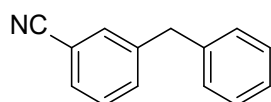

**3x**

3-Benzylbenzonitrile was prepared according to the general procedure A using 3-(aminomethyl)benzonitrile (264 μL, 2.00 mmol). Flash column chromatography (0–45% CH<sub>2</sub>Cl<sub>2</sub> in hexanes) of the crude reaction mixture afforded the product as an orange oil (84 mg, 0.44 mmol, 87% yield).

**<sup>1</sup>H NMR** (400 MHz, CDCl<sub>3</sub>) δ 7.55 – 7.45 (m, 3H), 7.44 – 7.39 (m, 1H), 7.39 – 7.33 (m, 2H), 7.32 – 7.26 (m, 1H), 7.25 – 7.17 (m, 2H), 4.05 (s, 2H).

**<sup>13</sup>C NMR** (101 MHz, CDCl<sub>3</sub>) δ 142.66, 139.47, 133.46, 132.37, 129.94, 129.28, 128.96, 128.82, 126.71, 118.96, 112.52, 41.42.

**HRMS** (ESI) m/z: [M]<sup>+</sup> Calculated for C<sub>14</sub>H<sub>11</sub>N<sup>+</sup> 193.0886; Found 193.0883.

The spectral data are consistent with those reported in the literature<sup>18</sup>.

### 1-Benzyl-3-nitrobenzene

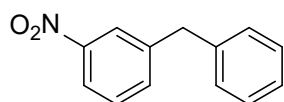

**3y**

1-Benzyl-3-nitrobenzene was prepared according to the general procedure A using 3-nitrobenzylamine (249 μL, 2.00 mmol). Flash column chromatography (0–40% CH<sub>2</sub>Cl<sub>2</sub> in hexanes) of the crude reaction mixture afforded the product as a colourless oil (95 mg, 0.44 mmol, 89% yield).

**<sup>1</sup>H NMR** (400 MHz, CDCl<sub>3</sub>) δ 8.16 – 8.04 (m, 2H), 7.61 – 7.52 (m, 1H), 7.52 – 7.43 (m, 1H), 7.41 – 7.33 (m, 2H), 7.33 – 7.24 (m, 1H), 7.28 – 7.19 (m, 2H), 4.12 (s, 2H).

**<sup>13</sup>C NMR** (101 MHz, CDCl<sub>3</sub>) δ 148.49, 143.29, 139.47, 135.18, 129.43, 128.99, 128.91, 126.82, 123.77, 121.41, 41.58.

**HRMS** (ESI) m/z: [M]<sup>+</sup> Calculated for C<sub>13</sub>H<sub>11</sub>NO<sub>2</sub><sup>+</sup> 213.0784; Found 213.0783.

The spectral data are consistent with those reported in the literature<sup>19</sup>.

### Methyl 3-benzylbenzoate

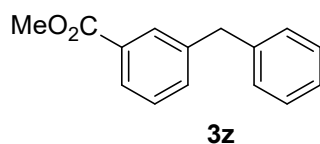

Methyl 3-benzylbenzoate was prepared according to the general procedure A using methyl 4-(aminomethyl)benzoate (330 mg, 2.00 mmol). Flash column chromatography (0–40% CH<sub>2</sub>Cl<sub>2</sub> in hexanes) of the crude reaction mixture afforded the product as a colourless oil (98 mg, 0.43 mmol, 86% yield).

**<sup>1</sup>H NMR** (400 MHz, CDCl<sub>3</sub>) δ 7.99 – 7.89 (m, 2H), 7.46 – 7.30 (m, 4H), 7.30 – 7.21 (m, 3H), 4.07 (s, 2H), 3.94 (s, 3H).

**<sup>13</sup>C NMR** (101 MHz, CDCl<sub>3</sub>) δ 167.21, 141.56, 140.57, 133.62, 130.44, 130.12, 128.96, 128.67, 128.63, 127.53, 126.39, 52.14, 41.80.

**HRMS** (ESI) m/z: [M]<sup>+</sup> Calculated for C<sub>15</sub>H<sub>14</sub>O<sub>2</sub><sup>+</sup> 226.0988; Found 226.0986.

The spectral data are consistent with those reported in the literature<sup>20</sup>.

### 1-Benzyl-3-(trifluoromethoxy)benzene

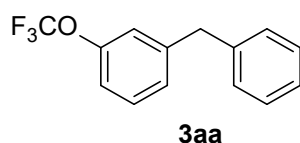

1-Benzyl-3-(trifluoromethoxy)benzene was prepared according to the general procedure A using 3-trifluoromethoxybenzylamine (301 μL, 2.00 mmol). Flash column chromatography (hexanes) of the crude reaction mixture afforded the product as a colourless oil (96 mg, 0.38 mmol, 76% yield).

**<sup>1</sup>H NMR** (400 MHz, CDCl<sub>3</sub>) δ 7.43 – 7.28 (m, 4H), 7.28 – 7.24 (m, 2H), 7.22 – 7.17 (m, 1H), 7.17 – 7.12 (m, 2H), 4.07 (s, 2H).

**<sup>13</sup>C NMR** (101 MHz, CDCl<sub>3</sub>) δ 149.59 (q, *J* = 1.9 Hz), 143.62, 140.19, 129.84, 129.07, 128.79, 127.44, 126.59, 121.59 (q, *J* = 1.0 Hz), 120.67 (q, *J* = 256.8 Hz), 118.62 (q, *J* = 1.1 Hz), 41.72.

**<sup>19</sup>F NMR** (377 MHz, CDCl<sub>3</sub>) δ -57.58.

**HRMS** (ESI) m/z: [M]<sup>+</sup> Calculated for C<sub>14</sub>H<sub>11</sub>F<sub>3</sub>O<sup>+</sup> 252.0757; Found 252.0752.

### 1-Benzyl-3-(trifluoromethyl)benzene

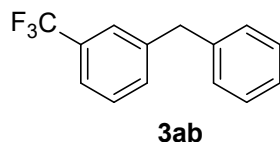

1-Benzyl-3-(trifluoromethyl)benzene was prepared according to the general procedure A using 3-trifluoromethylbenzylamine (287 μL, 2.00 mmol). Flash column chromatography (hexanes) of the crude reaction mixture afforded the product as a colourless oil (92 mg, 0.39 mmol, 78% yield).

**<sup>1</sup>H NMR** (400 MHz, CDCl<sub>3</sub>) δ 7.58 – 7.51 (m, 2H), 7.50 – 7.35 (m, 4H), 7.34 – 7.27 (m, 1H), 7.28 – 7.21 (m, 2H), 4.10 (s, 2H).



**<sup>13</sup>C NMR** (101 MHz, CDCl<sub>3</sub>) δ 142.18, 140.17, 132.62 – 132.32 (m), 130.92 (q, *J* = 32.0 Hz), 129.05, 129.04, 128.82, 126.62, 125.73 (q, *J* = 3.8 Hz), 124.38 (q, *J* = 272.3 Hz), 123.18 (q, *J* = 3.8 Hz), 41.82.

**<sup>19</sup>F NMR** (377 MHz, CDCl<sub>3</sub>) δ -62.39.

**HRMS** (ESI) *m/z*: [M]<sup>+</sup> Calculated for C<sub>14</sub>H<sub>11</sub>F<sub>3</sub><sup>+</sup> 236.0807; Found 236.0803.

The spectral data are consistent with those reported in the literature<sup>19</sup>.

### 1-Benzyl-2-methylbenzene

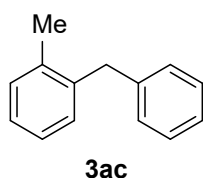

1-Benzyl-2-methylbenzene was prepared according to the general procedure A using 2-methylbenzylamine (248 μL, 2.00 mmol). Flash column chromatography (hexanes) of the crude reaction mixture afforded the product as a colourless oil (39 mg, 0.22 mmol, 43% yield).

**<sup>1</sup>H NMR** (400 MHz, CDCl<sub>3</sub>) δ 7.38 – 7.32 (m, 2H), 7.30 – 7.16 (m, 7H), 4.07 (s, 2H), 2.33 (s, 3H).

**<sup>13</sup>C NMR** (101 MHz, CDCl<sub>3</sub>) δ 140.53, 139.06, 136.77, 130.42, 130.08, 128.88, 128.52, 126.59, 126.12, 126.05, 39.59, 19.81.

**HRMS** (ESI) *m/z*: [M]<sup>+</sup> Calculated for C<sub>14</sub>H<sub>14</sub><sup>+</sup> 182.1090; Found 182.1088.

The spectral data are consistent with those reported in the literature<sup>10</sup>.

### 1-Benzyl-2-fluorobenzene

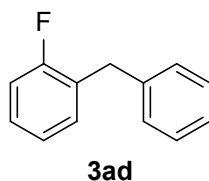

1-Benzyl-2-fluorobenzene was prepared according to the general procedure A using 2-fluorobenzylamine (229 μL, 2.00 mmol). Flash column chromatography (hexanes) of the crude reaction mixture afforded the product as a colourless oil (65 mg, 0.35 mmol, 70% yield).

**<sup>1</sup>H NMR** (400 MHz, CDCl<sub>3</sub>) δ 7.38 – 7.32 (m, 2H), 7.32 – 7.17 (m, 5H), 7.14 – 7.06 (m, 2H), 4.08 (s, 2H).

**<sup>13</sup>C NMR** (101 MHz, CDCl<sub>3</sub>) δ 161.11 (d, *J* = 245.3 Hz), 139.99, 131.16 (d, *J* = 4.6 Hz), 128.94, 128.64, 128.21 (d, *J* = 16.1 Hz), 128.07 (d, *J* = 8.0 Hz), 126.36, 124.19 (d, *J* = 3.6 Hz), 115.45 (d, *J* = 22.1 Hz), 34.94 (d, *J* = 3.0 Hz).

**<sup>19</sup>F NMR** (377 MHz, CDCl<sub>3</sub>) δ -117.77.

**HRMS** (ESI) *m/z*: [M]<sup>+</sup> Calculated for C<sub>13</sub>H<sub>11</sub>F<sup>+</sup> 186.0839; Found 186.0834.

The spectral data are consistent with those reported in the literature<sup>10</sup>.

### 1-Benzyl-2-bromobenzene

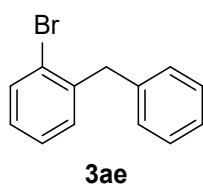

1-Benzyl-2-bromobenzene was prepared according to the general procedure A using 2-bromobenzylamine (250  $\mu$ L, 2.00 mmol). Flash column chromatography (hexanes) of the crude reaction mixture afforded the product as a colourless oil (81 mg, 0.33 mmol, 66% yield).

$^1\text{H NMR}$  (400 MHz,  $\text{CDCl}_3$ )  $\delta$  7.60 (dd,  $J = 8.0, 1.3$  Hz, 1H), 7.36 – 7.30 (m, 2H), 7.29 – 7.20 (m, 4H), 7.18 – 7.15 (m, 1H), 7.11 (ddd,  $J = 7.9, 7.3, 1.8$  Hz, 1H), 4.16 (s, 2H).

$^{13}\text{C NMR}$  (101 MHz,  $\text{CDCl}_3$ )  $\delta$  140.52, 139.63, 133.00, 131.24, 129.14, 128.62, 128.03, 127.61, 126.40, 125.05, 41.87.

**HRMS** (ESI)  $m/z$ :  $[\text{M}]^+$  Calculated for  $\text{C}_{13}\text{H}_{11}\text{Br}^+$  246.0039; Found 246.0037.

The spectral data are consistent with those reported in the literature<sup>10</sup>.

### 1-Benzyl-2-(trifluoromethyl)benzene

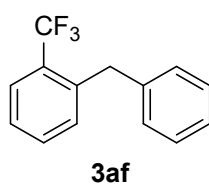

1-Benzyl-2-(trifluoromethyl)benzene was prepared according to the general procedure A using 2-trifluoromethylbenzylamine (281  $\mu$ L, 2.00 mmol). Flash column chromatography (hexanes) of the crude reaction mixture afforded the product as a colourless oil (74 mg, 0.31 mmol, 63% yield).

$^1\text{H NMR}$  (400 MHz,  $\text{CDCl}_3$ )  $\delta$  7.73 (dd,  $J = 7.9, 1.4$  Hz, 1H), 7.48 (td,  $J = 7.6, 1.4$  Hz, 1H), 7.42 – 7.32 (m, 3H), 7.32 – 7.26 (m, 1H), 7.27 – 7.19 (m, 3H), 4.26 (s, 2H).

$^{13}\text{C NMR}$  (101 MHz,  $\text{CDCl}_3$ )  $\delta$  140.02, 139.66 (q,  $J = 2.0$  Hz), 131.91 (q,  $J = 1.0$  Hz), 131.87, 129.29, 128.86 (q,  $J = 30.3$  Hz), 128.66, 126.47, 126.35, 126.01 (q,  $J = 5.8$  Hz), 124.76 (q,  $J = 273.9$  Hz), 37.94.

$^{19}\text{F NMR}$  (377 MHz,  $\text{CDCl}_3$ )  $\delta$  -59.51.

**HRMS** (ESI)  $m/z$ :  $[\text{M}]^+$  Calculated for  $\text{C}_{14}\text{H}_{11}\text{F}_3^+$  236.0807; Found 236.0807.

The spectral data are consistent with those reported in the literature<sup>21</sup>.

### 1-Benzyl-4-chloro-2-fluorobenzene

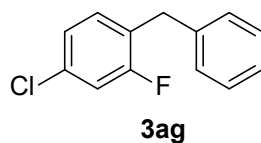

1-Benzyl-4-chloro-2-fluorobenzene was prepared according to the general procedure A using 4-chloro-2-fluorobenzylamine (251  $\mu\text{L}$ , 2.00 mmol). Flash column chromatography (hexanes) of the crude reaction mixture afforded the product as a colourless oil (92 mg, 0.42 mmol, 83% yield).

$^1\text{H NMR}$  (400 MHz,  $\text{CDCl}_3$ )  $\delta$  7.42 – 7.34 (m, 2H), 7.34 – 7.25 (m, 3H), 7.20 – 7.07 (m, 3H), 4.04 (s, 2H).

$^{13}\text{C NMR}$  (101 MHz,  $\text{CDCl}_3$ )  $\delta$  160.78 (d,  $J = 249.0$  Hz), 139.34 – 139.32 (m), 132.83 (d,  $J = 10.2$  Hz), 131.79 (d,  $J = 5.5$  Hz), 128.91 – 128.82 (m), 128.74, 126.94 (d,  $J = 16.1$  Hz), 126.57, 124.55 (d,  $J = 3.7$  Hz), 116.24 (d,  $J = 25.7$  Hz), 34.46.

$^{19}\text{F NMR}$  (377 MHz,  $\text{CDCl}_3$ )  $\delta$  -114.97.

**HRMS** (ESI)  $m/z$ :  $[\text{M}]^+$  Calculated for  $\text{C}_{13}\text{H}_{10}\text{ClF}^+$  220.0450; Found 220.0449.

### 2-Benzyl-1,3-difluorobenzene

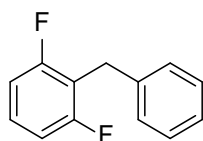

**3ah**

2-Benzyl-1,3-difluorobenzene was prepared according to the general procedure A using 2,6-difluorobenzylamine (239  $\mu\text{L}$ , 2.00 mmol). Flash column chromatography (hexanes) of the crude reaction mixture afforded the product as a colourless oil (87 mg, 0.42 mmol, 85% yield).

$^1\text{H NMR}$  (400 MHz,  $\text{CDCl}_3$ )  $\delta$  7.38 – 7.34 (m, 4H), 7.31 – 7.15 (m, 2H), 6.94 (ddd,  $J = 8.0, 6.5, 1.1$  Hz, 2H), 4.10 (t,  $J = 1.5$  Hz, 2H).

$^{13}\text{C NMR}$  (101 MHz,  $\text{CDCl}_3$ )  $\delta$  161.54 (dd,  $J = 247.1, 8.6$  Hz), 139.32, 128.63, 128.58, 127.99 (t,  $J = 10.2$  Hz), 126.45, 117.01 (t,  $J = 20.3$  Hz), 111.69 – 110.84 (m), 28.30.

$^{19}\text{F NMR}$  (377 MHz,  $\text{CDCl}_3$ )  $\delta$  -114.89.

**HRMS** (ESI)  $m/z$ :  $[\text{M}]^+$  Calculated for  $\text{C}_{13}\text{H}_{10}\text{F}_2^+$  204.0745; Found 204.0746.

The spectral data are consistent with those reported in the literature<sup>22</sup>.

### 1-Benzyl-3,5-dimethylbenzene

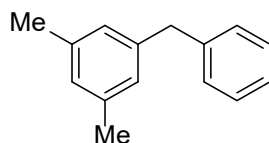

**3ai**

1-Benzyl-3,5-dimethylbenzene was prepared according to the general procedure A using 3,5-dimethylbenzylamine (284  $\mu\text{L}$ , 2.00 mmol). Flash column chromatography (hexanes) of the crude reaction mixture afforded the product as a colourless oil (60 mg, 0.31 mmol, 62% yield).

$^1\text{H NMR}$  (400 MHz,  $\text{CDCl}_3$ )  $\delta$  7.43 – 7.34 (m, 2H), 7.34 – 7.25 (m, 3H), 6.99 – 6.88 (m, 3H), 4.01 (s, 2H), 2.38 (s, 6H).

$^{13}\text{C NMR}$  (101 MHz,  $\text{CDCl}_3$ )  $\delta$  141.49, 141.10, 138.04, 129.04, 128.54, 127.86, 126.91, 126.09, 41.97, 21.40.

**HRMS** (ESI)  $m/z$ :  $[\text{M}]^+$  Calculated for  $\text{C}_{15}\text{H}_{16}^+$  196.1247; Found 196.1244.

The spectral data are consistent with those reported in the literature<sup>23</sup>.

#### 4-Benzylpyridine

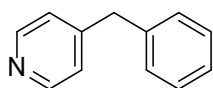

**3aj**

4-Benzylpyridine was prepared according to the general procedure using pyridine-4-ylmethanamine (203  $\mu$ L, 2.00 mmol). Flash column chromatography (0–50%  $\text{CH}_2\text{Cl}_2$  in hexanes) of the crude reaction mixture afforded the product as a colourless oil (52 mg, 0.31 mmol, 62% yield).

**$^1\text{H}$  NMR** (400 MHz,  $\text{CDCl}_3$ )  $\delta$  8.57 – 8.40 (m, 2H), 7.39 – 7.31 (m, 2H), 7.31 – 7.23 (m, 1H), 7.23 – 7.17 (m, 2H), 7.16 – 7.08 (m, 2H), 3.99 (s, 2H).

**$^{13}\text{C}$  NMR** (101 MHz,  $\text{CDCl}_3$ )  $\delta$  150.21, 149.91, 138.97, 129.17, 128.87, 126.82, 124.33, 41.38.

**HRMS** (ESI)  $m/z$ :  $[\text{M}]^+$  Calculated for  $\text{C}_{12}\text{H}_{11}\text{N}^+$  169.0886; Found 169.0883.

The spectral data are consistent with those reported in the literature<sup>24</sup>.

## 5. Arylboronic acid substrate scope

### General procedure B for arylboronic acid scope

A 16 mL oven-dried glass vial equipped with a stirring bar was charged with arylboronic acid (0.50 mmol, 1.00 equiv.) and sodium carbonate (53 mg, 0.50 mmol, 1.00 equiv.) The vial was evacuated and refilled with N<sub>2</sub> three times. Anhydrous chloroform (1.25 mL) was then added followed by benzylamine (218  $\mu$ L, 2.00 mmol, 4.00 equiv.) and isoamyl nitrite (335  $\mu$ L, 2.50 mmol, 5.00 equiv.). The reaction was heated at 60°C for 24 h. The crude reaction mixture was allowed to cool down to room temperature, concentrated and purified by flash column chromatography.

### 1-Benzyl-4-methylbenzene

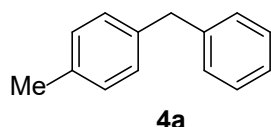

1-Benzyl-4-methylbenzene was prepared according to the general procedure B using 4-methylphenylboronic acid (68 mg, 0.50 mmol). Flash column chromatography (hexanes) of the crude reaction mixture afforded the products 1-benzyl-4-methylbenzene and 1-benzyl-3-methylbenzene as a colourless oil (53 mg, 0.29 mmol, 58% yield, *para:meta* = 92:8).

<sup>1</sup>H NMR (400 MHz, CDCl<sub>3</sub>)  $\delta$  7.41 – 7.33 (m, 2H), 7.33 – 7.24 (m, 3H), 7.24 – 7.07 (m, 4H), 4.10 – 4.02 (m, 2H), 2.47 – 2.37 (m, 3H).

<sup>13</sup>C NMR (101 MHz, CDCl<sub>3</sub>)  $\delta$  141.54, 141.38 (meta), 141.16 (meta), 138.21, 138.15 (meta), 135.65, 129.85 (meta), 129.28, 129.05 (meta), 129.00, 128.95, 128.56, 128.48 (meta), 126.95 (meta), 126.14 (meta), 126.11, 42.03 (meta), 41.65, 21.54 (meta), 21.14.

### 1-Benzyl-4-(*tert*-butyl)benzene

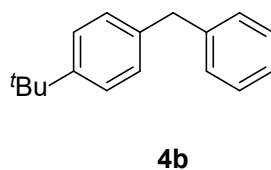

1-Benzyl-4-(*tert*-butyl)benzene was prepared according to the general procedure B using 4-*tert*-butylphenylboronic acid (89 mg, 0.50 mmol). Flash column chromatography (hexanes) of the crude reaction mixture afforded the products 1-benzyl-4-(*tert*-butyl)benzene and 1-benzyl-3-(*tert*-butyl)benzene as a colourless oil (47 mg, 0.21 mmol, 42% yield, *para:meta* = 91:9).

<sup>1</sup>H NMR (400 MHz, CDCl<sub>3</sub>)  $\delta$  7.40 – 7.33 (m, 4H), 7.33 – 7.24 (m, 3H), 7.24 – 7.16 (m, 2H), 7.12 – 6.99 (m, 1H, meta), 4.07 (s, 2H, meta), 4.04 (s, 2H), 1.39 (s, 9H).

<sup>13</sup>C NMR (101 MHz, CDCl<sub>3</sub>)  $\delta$  151.39 (meta), 148.96, 141.42, 140.75 (meta), 138.22, 129.11, 129.05 (meta), 128.65, 128.56, 128.55 (meta), 128.28 (meta), 126.17 (meta), 126.16 (meta), 126.13, 126.11 (meta), 125.48, 123.15 (meta), 42.33 (meta), 41.58, 34.75 (meta), 34.50, 31.54.

#### 4-Benzyl-1,1'-biphenyl

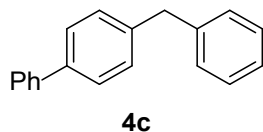

4-Benzyl-1,1'-biphenyl was prepared according to the general procedure B using 4-biphenylboronic acid (99 mg, 0.50 mmol). Flash column chromatography (hexanes) of the crude reaction mixture afforded the products 4-benzyl-1,1'-biphenyl and 3-benzyl-1,1'-biphenyl as a white solid (90 mg, 0.37 mmol, 74% yield, *para:meta* = 93:7).

**<sup>1</sup>H NMR** (400 MHz, CDCl<sub>3</sub>) δ 7.65 – 7.60 (m, 2H), 7.59 – 7.54 (m, 2H), 7.51 – 7.43 (m, 2H), 7.40 – 7.20 (m, 8H), 4.10 (s, 2H, meta), 4.07 (s, 2H).

**<sup>13</sup>C NMR** (101 MHz, CDCl<sub>3</sub>) δ 141.71 (meta), 141.55 (meta), 141.35 (meta), 141.13, 141.12, 140.37, 139.16, 129.45, 129.10, 129.01 (meta), 128.85, 128.65, 128.03 (meta), 127.96 (meta), 127.34, 127.20, 127.13, 126.28, 125.12 (meta), 42.16 (meta), 41.71.

#### 1-Benzyl-4-fluorobenzene

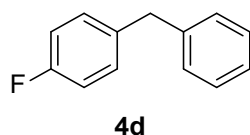

1-Benzyl-4-fluorobenzene was prepared according to the general procedure B using 4-fluorophenylboronic acid (70 mg, 0.50 mmol). Flash column chromatography (hexanes) of the crude reaction mixture afforded the products 1-benzyl-4-fluorobenzene and 1-benzyl-3-fluorobenzene as a colourless oil (62 mg, 0.33 mmol, 67% yield, *para:meta* = 93:7).

**<sup>1</sup>H NMR** (400 MHz, CDCl<sub>3</sub>) δ 7.39 – 7.32 (m, 2H), 7.32 – 7.15 (m, 5H), 7.03 (td, *J* = 8.8, 2.0 Hz, 2H), 6.97 – 6.91 (m, 2H, meta), 4.04 (s, 2H, meta), 4.02 (s, 2H).

**<sup>13</sup>C NMR** (101 MHz, CDCl<sub>3</sub>) δ 161.56 (d, *J* = 243.9 Hz), 141.08, 140.42 (meta), 136.90 (d, *J* = 3.2 Hz), 130.42 (d, *J* = 7.8 Hz), 129.96 (d, *J* = 8.3 Hz, meta), 129.06 (meta), 128.97, 128.72 (meta), 128.67, 126.48 (meta), 126.34, 124.68 (meta), 115.91 (d, *J* = 21.4 Hz, meta), 115.34 (d, *J* = 21.2 Hz), 113.11 (d, *J* = 21.1 Hz, meta), 41.76 (d, *J* = 1.7 Hz, meta), 41.21.

**<sup>19</sup>F NMR** (376 MHz, CDCl<sub>3</sub>) δ -113.40 (meta), -117.26.

#### 1-Benzyl-4-chlorobenzene

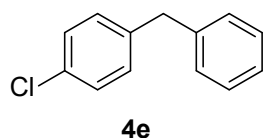

1-Benzyl-4-chlorobenzene was prepared according to the general procedure B using 4-chlorophenylboronic acid (78 mg, 0.50 mmol). Flash column chromatography (hexanes) of the crude reaction mixture afforded the products 1-benzyl-4-chlorobenzene and 1-benzyl-3-chlorobenzene as a colourless oil (76 mg, 0.37 mmol, 75% yield, *para:meta* = 94:6).

**<sup>1</sup>H NMR** (400 MHz, CDCl<sub>3</sub>) δ 7.40 – 7.34 (m, 2H), 7.34 – 7.21 (m, 5H), 7.21 – 7.12 (m, 2H), 4.01 (s, 2H).  
**<sup>13</sup>C NMR** (101 MHz, CDCl<sub>3</sub>) δ 143.28 (meta), 140.67, 140.31 (meta), 139.71, 134.37 (meta), 132.02, 130.38, 129.81 (meta), 129.14 (meta), 129.05 (meta), 128.99, 128.73 (meta), 128.69, 128.69, 127.23 (meta), 126.50 (meta), 126.42, 41.69 (meta), 41.36.

#### 1-Benzyl-4-bromobenzene

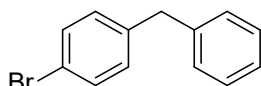

4f

1-Benzyl-4-bromobenzene was prepared according to the general procedure B using 4-bromophenylboronic acid (100 mg, 0.50 mmol). Flash column chromatography (hexanes) of the crude reaction mixture afforded the products 1-benzyl-4-bromobenzene and 1-benzyl-3-bromobenzene as a colourless oil (81 mg, 0.33 mmol, 65% yield, *para:meta* = 95:5).

**<sup>1</sup>H NMR** (400 MHz, CDCl<sub>3</sub>) δ 7.49 – 7.43 (m, 2H), 7.42 – 7.32 (m, 2H), 7.31 – 7.26 (m, 1H), 7.25 – 7.20 (m, 2H), 7.20 – 7.15 (m, 2H, meta), 7.15 – 7.09 (m, 2H), 4.01 (s, 2H, meta), 3.99 (s, 2H).  
**<sup>13</sup>C NMR** (101 MHz, CDCl<sub>3</sub>) δ 143.57 (meta), 140.56, 140.28 (meta), 140.22, 132.04 (meta), 131.63, 130.79, 130.12 (meta), 129.35 (meta), 129.04 (meta), 128.98, 128.73 (meta), 128.70, 127.69 (meta), 126.50 (meta), 126.43, 122.69 (meta), 120.06, 41.65 (meta), 41.42.

#### 1-Benzyl-4-iodobenzene

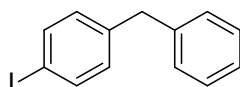

4g

1-Benzyl-4-iodobenzene was prepared according to the general procedure B using 4-iodophenylboronic acid (124 mg, 0.50 mmol). Flash column chromatography (hexanes) of the crude reaction mixture afforded the products 1-benzyl-4-iodobenzene and 1-benzyl-3-iodobenzene as a colourless oil (116 mg, 0.39 mmol, 79% yield, *para:meta* = 96:4).

**<sup>1</sup>H NMR** (400 MHz, CDCl<sub>3</sub>) δ 7.72 – 7.65 (m, 2H), 7.64 – 7.57 (m, 2H, meta), 7.40 – 7.33 (m, 2H), 7.32 – 7.26 (m, 1H), 7.26 – 7.19 (m, 2H), 7.08 (t, *J* = 7.7 Hz, 1H, meta), 7.04 – 6.93 (m, 2H), 3.99 (s, 2H).  
**<sup>13</sup>C NMR** (101 MHz, CDCl<sub>3</sub>) δ 143.63 (meta), 140.87, 140.48, 140.28 (meta), 137.95 (meta), 137.59, 135.30 (meta), 131.12, 130.29 (meta), 129.00 (meta), 128.97, 128.71 (meta), 128.68, 128.32 (meta), 126.47 (meta), 126.41, 94.74 (meta), 91.45, 41.53 (meta), 41.51.

#### 1-Benzyl-4-(trifluoromethoxy)benzene

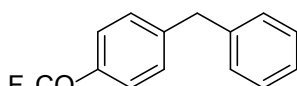

4h

1-Benzyl-4-(trifluoromethoxy)benzene was prepared according to the general procedure B using 4-trifluoromethoxyphenylboronic acid (103 mg, 0.50 mmol). Flash column chromatography (hexanes)

of the crude reaction mixture afforded the products 1-benzyl-4-(trifluoromethoxy)benzene and 1-benzyl-3-(trifluoromethoxy)benzene as a colourless oil (80 mg, 0.32 mmol, 63% yield, *para:meta* = 94:6).

**<sup>1</sup>H NMR** (400 MHz, CDCl<sub>3</sub>) δ 7.41 – 7.33 (m, 2H), 7.32 – 7.22 (m, 5H), 7.19 (d, *J* = 8.3 Hz, 2H), 7.12 (d, *J* = 8.3 Hz, 2H, meta), 4.05 (s, 2H, meta), 4.04 (s, 2H).

**<sup>13</sup>C NMR** (101 MHz, CDCl<sub>3</sub>) δ 147.76 (d, *J* = 1.9 Hz), 143.60 (meta), 140.58, 140.18 (meta), 140.04, 130.27, 129.84 (meta), 129.05, 128.76, 127.43 (meta), 126.58 (meta), 126.51, 121.58 (meta), 121.16 (q, *J* = 1.0 Hz), 120.68 (q, *J* = 256.7 Hz), 118.62 (meta), 41.72 (meta), 41.34.

**<sup>19</sup>F NMR** (377 MHz, CDCl<sub>3</sub>) δ -57.58 (meta), -57.78.

### 1-Benzyl-4-(trifluoromethyl)benzene

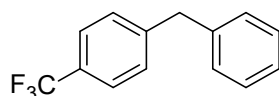

4i

1-Benzyl-4-(trifluoromethyl)benzene was prepared according to the general procedure B using 4-trifluoromethylphenylboronic acid (95 mg, 0.50 mmol). Flash column chromatography (hexanes) of the crude reaction mixture afforded the products 1-benzyl-4-(trifluoromethyl)benzene and 1-benzyl-3-(trifluoromethyl)benzene as a colourless oil (76 mg, 0.32 mmol, 65% yield, *para:meta* = 92:8).

**<sup>1</sup>H NMR** (400 MHz, CDCl<sub>3</sub>) δ 7.64 – 7.56 (m, 2H), 7.55 – 7.41 (m, 6H, meta), 7.41 – 7.34 (m, 4H), 7.33 – 7.27 (m, 1H), 7.27 – 7.20 (m, 2H), 4.09 (s, 2H).

**<sup>13</sup>C NMR** (101 MHz, CDCl<sub>3</sub>) δ 145.73 – 145.09 (m), 142.17 (meta), 140.16 (meta), 140.13, 132.46 (q, *J* = 1.0 Hz, meta), 129.34, 129.08, 129.05 (meta), 129.04 (meta), 128.81, 128.63 (q, *J* = 32.3 Hz), 126.62, 125.72 (q, *J* = 3.8 Hz, meta), 125.54 (q, *J* = 3.8 Hz), 124.50 (q, *J* = 271.9 Hz), 123.17 (q, *J* = 3.9 Hz, meta), 41.85, 41.82 (meta).

**<sup>19</sup>F NMR** (377 MHz, CDCl<sub>3</sub>) δ -62.18, -62.37 (meta).

### 1-Benzyl-3-methylbenzene

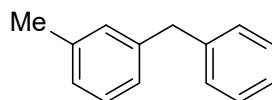

4j

1-Benzyl-3-methylbenzene was prepared according to the general procedure B using 3-methylphenylboronic acid (68 mg, 0.50 mmol). Flash column chromatography (hexanes) of the crude reaction mixture afforded the products 1-benzyl-3-methylbenzene, 1-benzyl-4-methylbenzene and 1-benzyl-2-methylbenzene as a colourless oil (64 mg, 0.35 mmol, 70% yield, *meta:para:ortho* = 94:3:3).

**<sup>1</sup>H NMR** (400 MHz, CDCl<sub>3</sub>) δ 7.42 – 7.33 (m, 2H), 7.33 – 7.22 (m, 4H), 7.23 – 7.17 (m, 4H, minor isomer), 7.15 – 7.05 (m, 3H), 4.08 (s, 2H, minor isomer), 4.04 (s, 2H), 2.41 (s, 3H), 2.34 (s, 3H, minor isomer).

**<sup>13</sup>C NMR** (101 MHz, CDCl<sub>3</sub>) δ 141.38, 141.16, 140.52 (ortho), 138.15, 130.41 (ortho), 130.08 (ortho), 129.85, 129.28 (para), 129.05, 129.04 (para), 128.95 (para), 128.87 (ortho), 128.56, 128.51 (ortho), 128.48, 126.96, 126.59 (ortho), 126.14, 126.12, 126.05 (ortho), 42.03, 41.65 (para), 39.58 (ortho), 21.54, 21.14 (para), 19.80 (ortho).



### 1-Benzyl-3-fluorobenzene

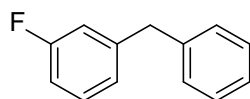

4k

1-Benzyl-3-fluorobenzene was prepared according to the general procedure B using 3-fluorophenylboronic acid (70 mg, 0.50 mmol). Flash column chromatography (hexanes) of the crude reaction mixture afforded the products 1-benzyl-3-fluorobenzene, 1-benzyl-4-fluorobenzene and 1-benzyl-2-fluorobenzene as a colourless oil (63 mg, 0.34 mmol, 67% yield, *meta:para:ortho* = 96:2:2).

$^1\text{H NMR}$  (400 MHz,  $\text{CDCl}_3$ )  $\delta$  7.41 – 7.33 (m, 2H), 7.33 – 7.20 (m, 4H), 7.08 – 7.01 (m, 1H), 7.01 – 6.90 (m, 2H), 4.07 (s, 2H, minor isomer), 4.03 (s, 2H).

$^{13}\text{C NMR}$  (101 MHz,  $\text{CDCl}_3$ )  $\delta$  163.11 (d,  $J = 245.6$  Hz), 143.82 (d,  $J = 7.1$  Hz), 140.42, 129.96 (d,  $J = 8.3$  Hz), 129.07, 128.97 (para), 128.93 (ortho), 128.72, 126.48, 126.36 (ortho), 124.67 (d,  $J = 2.8$  Hz), 115.92 (d,  $J = 21.2$  Hz), 115.34 (d,  $J = 21.1$  Hz, para), 113.11 (d,  $J = 21.0$  Hz), 41.76 (d,  $J = 1.8$  Hz), 41.21 (para).

$^{19}\text{F NMR}$  (377 MHz,  $\text{CDCl}_3$ )  $\delta$  -113.45, -117.30 (para), -117.78 (ortho).

### 1-Benzyl-3-chlorobenzene

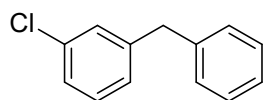

4l

1-Benzyl-3-chlorobenzene was prepared according to the general procedure B using 3-chlorophenylboronic acid (78 mg, 0.50 mmol). Flash column chromatography (hexanes) of the crude reaction mixture afforded the products 1-benzyl-3-chlorobenzene, 1-benzyl-4-chlorobenzene and 1-benzyl-2-chlorobenzene as a colourless oil (71 mg, 0.35 mmol, 70% yield, *meta:para:ortho* = 94:4:2).

$^1\text{H NMR}$  (400 MHz,  $\text{CDCl}_3$ )  $\delta$  7.48 – 7.42 (m, 2H, minor isomer), 7.43 – 7.34 (m, 2H), 7.34 – 7.22 (m, 6H), 7.21 – 7.17 (m, 3H, minor isomer), 7.17 – 7.12 (m, 1H), 4.19 (s, 2H, minor isomer), 4.02 (s, 2H).

$^{13}\text{C NMR}$  (101 MHz,  $\text{CDCl}_3$ )  $\delta$  143.28, 140.31, 139.71 (para), 134.37, 132.02 (para), 131.15 (ortho), 130.38 (para), 129.81, 129.66 (ortho), 129.14, 129.05, 128.99 (para), 128.91 (ortho), 128.73, 128.69 (para), 128.60 (ortho), 127.78 (ortho), 127.23, 126.95 (ortho), 126.50, 126.43, 126.37 (ortho), 41.69, 41.36 (para), 39.31 (ortho).

The spectral data for the ortho isomer are consistent with those reported in the literature<sup>25</sup>.

### 1-Benzyl-3-bromobenzene

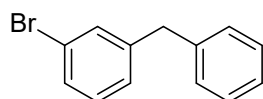

4m

1-Benzyl-3-bromobenzene was prepared according to the general procedure B using 3-bromophenylboronic acid (100 mg, 0.50 mmol). Flash column chromatography (hexanes) of the crude reaction mixture afforded the products 1-benzyl-3-bromobenzene, 1-benzyl-4-bromobenzene and 1-benzyl-2-bromobenzene as a colourless oil (83 mg, 0.34 mmol, 67% yield, *meta:para:ortho* = 89:7:4).

**<sup>1</sup>H NMR** (400 MHz, CDCl<sub>3</sub>) δ 7.64 (dd, *J* = 8.0, 1.3 Hz, 1H, minor isomer), 7.50 – 7.45 (m, 2H, minor isomer), 7.44 – 7.33 (m, 4H), 7.33 – 7.15 (m, 5H), 7.13 (d, *J* = 8.3 Hz, 2H, minor isomer), 4.20 (s, 2H, minor isomer), 4.01 (s, 2H), 4.00 (s, 2H, minor isomer).

**<sup>13</sup>C NMR** (101 MHz, CDCl<sub>3</sub>) δ 143.57, 140.55 (para), 140.28, 140.22 (para), 139.60 (ortho), 132.97 (ortho), 132.03, 131.63 (para), 131.21 (ortho), 130.78 (para), 130.12, 129.35, 129.12 (ortho), 129.03, 128.98 (para), 128.73, 128.70 (para), 128.60 (ortho), 128.01 (ortho), 127.69, 127.58 (ortho), 126.50, 126.43 (para), 122.68, 120.06 (para), 41.85 (ortho), 41.65, 41.42 (para).

### 1-Benzyl-3-(trifluoromethoxy)benzene

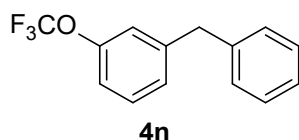

1-Benzyl-3-(trifluoromethoxy)benzene was prepared according to the general procedure B using 3-trifluoromethoxyphenylboronic acid (103 mg, 0.50 mmol). Flash column chromatography (hexanes) of the crude reaction mixture afforded the products 1-benzyl-3-(trifluoromethoxy)benzene and 1-benzyl-4-(trifluoromethoxy)benzene as a colourless oil (65 mg, 0.26 mmol, 52% yield, *meta:para* = 98:2).

**<sup>1</sup>H NMR** (400 MHz, CDCl<sub>3</sub>) δ 7.40 – 7.30 (m, 3H), 7.31 – 7.25 (m, 1H), 7.27 – 7.19 (m, 2H), 7.20 – 7.12 (m, 1H), 7.13 – 7.08 (m, 2H), 4.04 (s, 2H).

**<sup>13</sup>C NMR** (101 MHz, CDCl<sub>3</sub>) δ 149.57 (q, *J* = 1.8 Hz), 143.60, 140.18, 130.27 (para), 129.84, 129.06, 128.79, 127.43, 126.58, 121.58 (q, *J* = 1.0 Hz), 121.16 (para), 120.65 (d, *J* = 256.8 Hz), 118.62 (q, *J* = 1.2 Hz), 41.72, 41.35 (para).

**<sup>19</sup>F NMR** (377 MHz, CDCl<sub>3</sub>) δ -57.60, -57.80 (para).

### 1-Benzyl-3-(trifluoromethyl)benzene

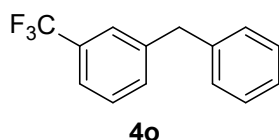

1-Benzyl-3-(trifluoromethyl)benzene was prepared according to the general procedure B using 3-trifluoromethylphenylboronic acid (95 mg, 0.50 mmol). Flash column chromatography (hexanes) of the crude reaction mixture afforded the products 1-benzyl-3-(trifluoromethyl)benzene, 1-benzyl-4-(trifluoromethyl)benzene and 1-benzyl-2-(trifluoromethyl)benzene as a colourless oil (82 mg, 0.35 mmol, 70% yield, *meta:para* = 96:4).

**<sup>1</sup>H NMR** (400 MHz, CDCl<sub>3</sub>) δ 7.62 – 7.58 (m, 2H, para), 7.56 – 7.48 (m, 2H), 7.48 – 7.34 (m, 4H), 7.33 – 7.27 (m, 1H), 7.27 – 7.21 (m, 2H), 4.10 (s, 2H).

**<sup>13</sup>C NMR** (101 MHz, CDCl<sub>3</sub>) δ 142.18, 140.17, 132.46 (q, *J* = 1.4 Hz), 130.92 (q, *J* = 32.0 Hz), 129.34 (para), 129.05, 129.04, 128.82, 128.61 (q, *J* = 32.2 Hz, para), 126.62, 125.73 (q, *J* = 3.9 Hz), 125.54 (q, *J* = 3.8 Hz, para), 124.38 (q, *J* = 273.3 Hz), 123.18 (q, *J* = 3.8 Hz), 41.82.

**<sup>19</sup>F NMR** (377 MHz, CDCl<sub>3</sub>) δ -62.22 (para), -62.41.

### 1-Benzyl-2-methylbenzene

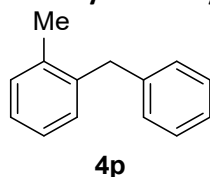

1-Benzyl-2-methylbenzene was prepared according to the general procedure B using 2-methylphenylboronic acid (68 mg, 0.50 mmol). Flash column chromatography (hexanes) of the crude reaction mixture afforded the products 1-benzyl-2-methylbenzene and 1-benzyl-3-methylbenzene as a colourless oil (46 mg, 0.25 mmol, 51% yield, *ortho:meta* = 94:6).

**<sup>1</sup>H NMR** (400 MHz, CDCl<sub>3</sub>) δ 7.39 – 7.30 (m, 2H), 7.30 – 7.13 (m, 7H), 7.15 – 7.03 (m, 3H, meta), 4.06 (s, 2H), 4.01 (s, 2H, meta), 2.38 (s, 3H, meta), 2.31 (s, 3H).

**<sup>13</sup>C NMR** (101 MHz, CDCl<sub>3</sub>) δ 141.38 (meta), 141.17 (meta), 140.53, 139.06, 138.17 (meta), 136.77, 130.42, 130.08, 129.86 (meta), 129.06 (meta), 128.88, 128.57 (meta), 128.52, 128.48 (meta), 126.96 (meta), 126.59, 126.15 (meta), 126.12, 126.05, 42.03 (meta), 39.59, 21.54 (meta), 19.81.

### 1-Benzyl-2-fluorobenzene

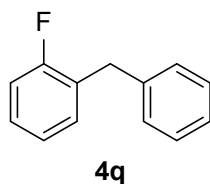

1-Benzyl-2-fluorobenzene was prepared according to the general procedure B using 2-fluorophenylboronic acid (70 mg, 0.50 mmol). Flash column chromatography (hexanes) of the crude reaction mixture afforded the products 1-benzyl-2-fluorobenzene and 1-benzyl-3-fluorobenzene as a colourless oil (34 mg, 0.18 mmol, 36% yield, *ortho:meta* = 96:4).

**<sup>1</sup>H NMR** (400 MHz, CDCl<sub>3</sub>) δ 7.39 – 7.30 (m, 2H), 7.30 – 7.15 (m, 5H), 7.14 – 7.05 (m, 2H), 7.04 – 6.81 (m, 4H, meta), 4.05 (s, 2H), 4.02 (s, 2H, meta).

**<sup>13</sup>C NMR** (101 MHz, CDCl<sub>3</sub>) δ 161.11 (d, *J* = 245.4 Hz), 140.00, 131.17 (d, *J* = 4.7 Hz), 129.97 (d, *J* = 8.2 Hz, meta), 129.07 (meta), 128.94 (d, *J* = 0.8 Hz), 128.72 (meta), 128.64, 128.21 (d, *J* = 16.2 Hz), 128.07 (d, *J* = 8.0 Hz), 126.48 (meta), 126.36, 124.67 (d, *J* = 2.7 Hz, meta), 124.20 (d, *J* = 3.6 Hz), 115.45 (d, *J* = 22.1 Hz), 113.11 (d, *J* = 21.5 Hz, meta), 34.94 (d, *J* = 3.0 Hz).

**<sup>19</sup>F NMR** (377 MHz, CDCl<sub>3</sub>) δ -113.48 (meta), -117.80.

### 1-Benzyl-3,5-dimethylbenzene

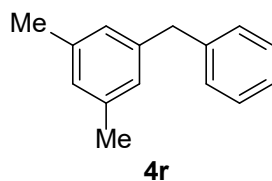

1-Benzyl-3,5-dimethylbenzene was prepared according to the general procedure B using 3,5-dimethylphenylboronic acid (75 mg, 0.50 mmol). Flash column chromatography (hexanes) of the crude

reaction mixture afforded the products 1-benzyl-3,5-dimethylbenzene and 1-benzyl-2,4-dimethylbenzene as a colourless oil (56 mg, 0.28 mmol, 57% yield, *major:minor* = 99:1).

**<sup>1</sup>H NMR** (400 MHz, CDCl<sub>3</sub>) δ 7.42 – 7.31 (m, 2H), 7.31 – 7.23 (m, 3H), 6.95 – 6.86 (m, 3H), 3.99 (s, 2H), 2.36 (s, 6H).

**<sup>13</sup>C NMR** (101 MHz, CDCl<sub>3</sub>) δ 141.50, 141.11, 138.06, 131.26 (minor), 130.04 (minor), 129.05, 128.83 (minor), 128.55, 128.49 (minor), 127.86, 126.92, 126.73 (minor), 126.10, 125.96 (minor), 41.97, 39.18 (minor), 21.41, 21.08 (minor), 19.73 (minor).

The spectral data for the major and minor isomer are consistent with those reported in the literature<sup>23</sup>.

## 6. Unsuccessful substrates

### Benzylamines

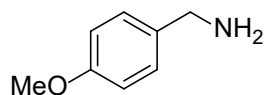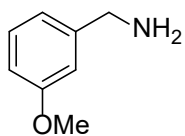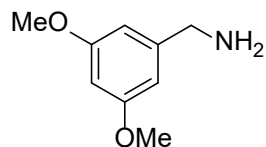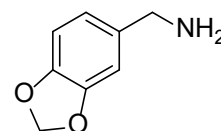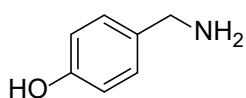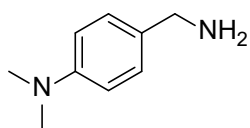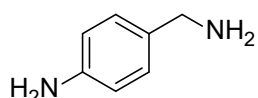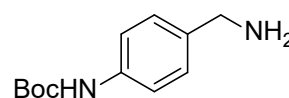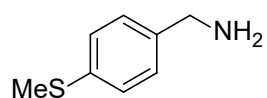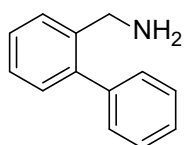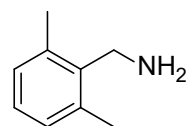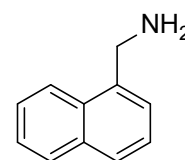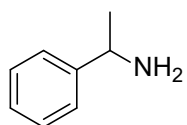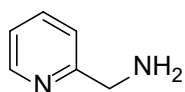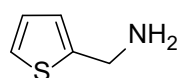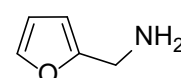

### Arylboronic acids

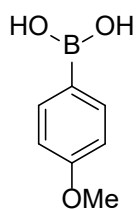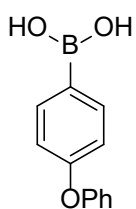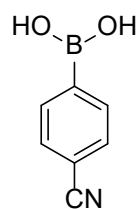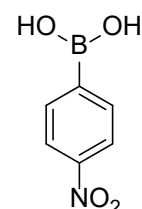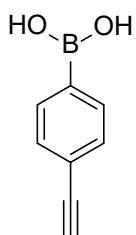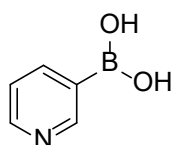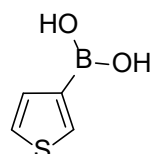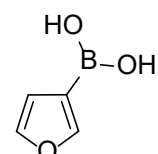

## 7. Mechanistic experiments

### 7.1. Probing the isomer formation in the diazo pathway

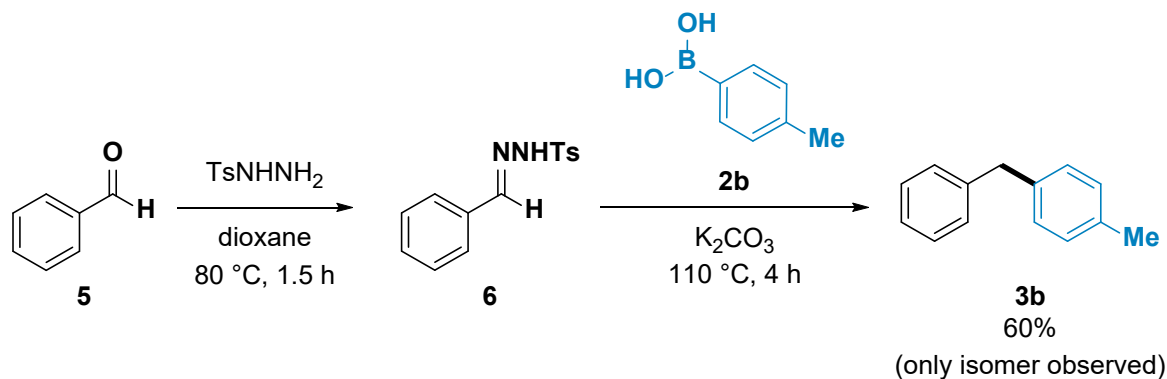

#### 1-Benzyl-4-methylbenzene

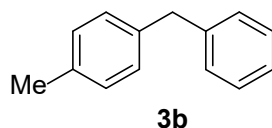

1-Benzyl-4-methylbenzene was synthesised according to the previously reported procedure<sup>26</sup>. A 16 mL oven-dried glass vial equipped with a stirring bar was charged with dry dioxane (4 mL), benzaldehyde (102  $\mu\text{L}$ , 1.00 mmol, 1.00 equiv.) and tosylhydrazide (187 mg, 1.00 mmol, 1.00 equiv.) and the reaction mixture was stirred at  $80\text{ }^\circ\text{C}$  for 90 min. Potassium carbonate (207 mg, 1.50 mmol, 1.50 equiv.) and 4-methylphenylboronic acid (204 mg, 1.50 mmol, 1.50 equiv.) were then added. The reaction mixture was stirred at  $110\text{ }^\circ\text{C}$  for 4 h. The crude reaction mixture was allowed to cool down to room temperature and a saturated aqueous solution of  $\text{NaHCO}_3$  and dichloromethane were added. The layers were separated and the aqueous phase was extracted with dichloromethane three times. The combined organic layers were washed with brine, dried over  $\text{MgSO}_4$  and filtered. The solvent was removed under reduced pressure and the residue purified by flash column chromatography (hexanes) to yield 1-benzyl-4-methylbenzene as a colourless oil (110 mg, 0.60 mmol, 60% yield).

$^1\text{H NMR}$  (400 MHz,  $\text{CDCl}_3$ )  $\delta$  7.36 – 7.29 (m, 2H), 7.27 – 7.20 (m, 3H), 7.17 – 7.10 (m, 4H), 3.99 (s, 2H), 2.36 (s, 3H).

$^{13}\text{C NMR}$  (101 MHz,  $\text{CDCl}_3$ )  $\delta$  141.56, 138.22, 135.68, 129.29, 129.01, 128.95, 128.57, 126.11, 41.66, 21.15.

### 7.2. Deuterium-hydrogen scrambling

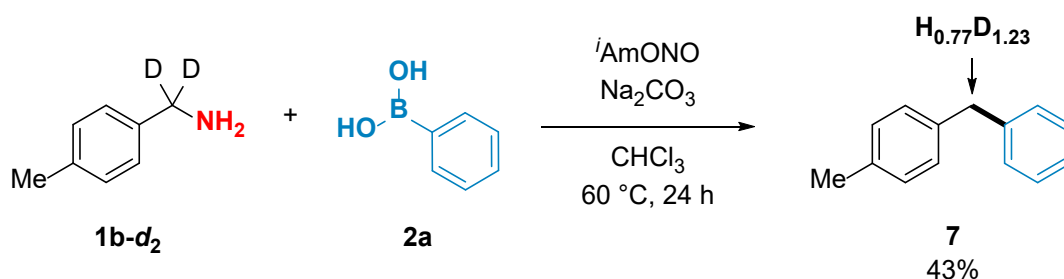

### 1-Methyl-4-(phenylmethyl-*d*<sub>2</sub>)benzene and 1-methyl-4-(phenylmethyl-*d*)benzene

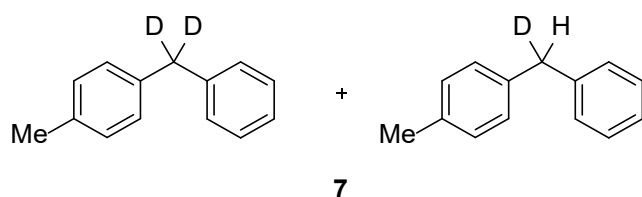

A 16 mL oven-dried glass vial equipped with a stirring bar was charged with phenylboronic acid (61 mg, 0.50 mmol, 1.00 equiv.) and sodium carbonate (53 mg, 0.50 mmol, 1.00 equiv.). The vial was sealed with a septum cap and evacuated and refilled with N<sub>2</sub> three times. Dry chloroform (1.25 mL) was then added followed by *p*-tolylmethan-*d*<sub>2</sub>-amine (246 mg, 2.00 mmol, 4.00 equiv.) and isoamyl nitrite (335  $\mu$ L, 2.50 mmol, 5.00 equiv.). The reaction was heated at 60 °C for 24 h. The crude reaction mixture was concentrated and purified by flash column chromatography (hexanes) to yield a mixture of 1-methyl-4-(phenylmethyl-*d*<sub>2</sub>)benzene and 1-methyl-4-(phenylmethyl-*d*)benzene as a colourless oil (40 mg, 0.22 mmol, 43% yield, 0.77H incorporation per benzylic position).

<sup>1</sup>H NMR (400 MHz, CDCl<sub>3</sub>)  $\delta$  7.40 – 7.32 (m, 2H), 7.31 – 7.24 (m, 3H), 7.21 – 7.11 (m, 4H), 4.02 – 3.99 (m, 0.77H), 2.40 (s, 3H).

<sup>2</sup>H NMR (92 MHz, CDCl<sub>3</sub>)  $\delta$  3.94, 3.92, 3.87.

<sup>13</sup>C NMR (101 MHz, CDCl<sub>3</sub>)  $\delta$  141.52, 138.18, 135.68, 129.28, 129.00, 128.94, 128.57, 126.12, 41.71 – 40.85 (m), 21.15.

HRMS (ESI) *m/z*: [M]<sup>+</sup> Calculated for C<sub>14</sub>H<sub>13</sub>D<sup>+</sup> 183.1153; Found 183.1151.

### 7.3. Probing the isomer ratio using an electron-deficient benzylamine

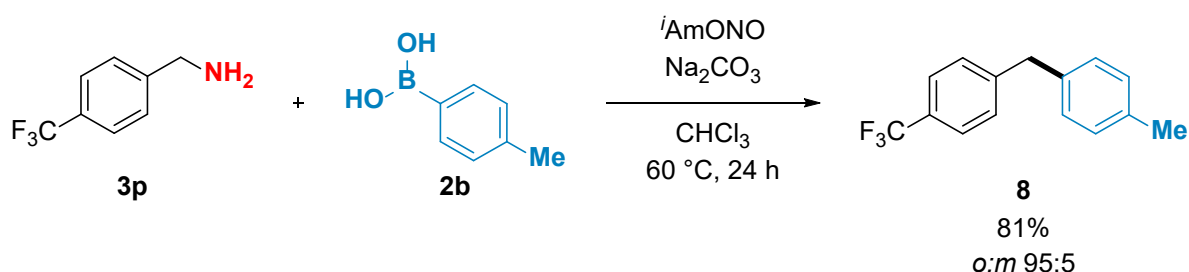

### 1-Methyl-4-(4-(trifluoromethyl)benzyl)benzene

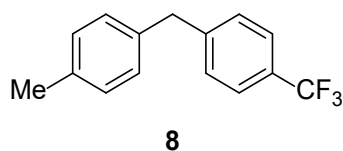

A 16 mL oven-dried glass vial equipped with a stirring bar was charged with 4-methylphenylboronic acid (68 mg, 0.50 mmol, 1.00 equiv.) and sodium carbonate (53 mg, 0.50 mmol, 1.00 equiv.). The vial was sealed with a septum cap and evacuated and refilled with N<sub>2</sub> three times. Dry chloroform (1.25 mL) was then added followed by 4-trifluoromethylbenzylamine (285 mg, 2.00 mmol, 4.00 equiv.) and isoamyl nitrite (335  $\mu$ L, 2.50 mmol, 5.00 equiv.). The reaction was heated at 60 °C for 24 h. The crude reaction mixture was concentrated and purified by flash column chromatography (hexanes) to yield products 1-methyl-4-(4-(trifluoromethyl)benzyl)benzene and 1-methyl-3-(4-(trifluoromethyl)benzyl)benzene as a colourless oil (102 mg, 0.41 mmol, 81% yield, 95:5 *p:m* isomer ratio).

**<sup>1</sup>H NMR** (400 MHz, CDCl<sub>3</sub>) δ 7.66 – 7.57 (m, 2H), 7.42 – 7.34 (m, 2H), 7.33 – 7.25 (m, 1H, minor isomer), 7.24 – 7.19 (m, 2H), 7.17 (d, *J* = 8.2 Hz, 2H), 7.14 – 7.05 (m, 1H, minor isomer), 4.08 (s, 2H), 2.42 (s, 3H).

**<sup>13</sup>C NMR** (101 MHz, CDCl<sub>3</sub>) δ 145.70 (q, *J* = 1.4 Hz), 145.52 (meta), 140.06 (meta), 138.46 (meta), 137.10, 136.18, 129.86 (meta), 129.51, 129.31 (meta), 129.26, 128.96, 128.70 (meta), 127.38 (meta), 126.12 (meta), 125.51 (q, *J* = 3.8 Hz), 124.51 (q, *J* = 271.8 Hz), 41.81 (meta), 41.44, 21.49 (meta), 21.11. (signal of the aromatic quaternary carbon *ipso* to CF<sub>3</sub> is missing due to overlap)

**<sup>19</sup>F NMR** (377 MHz, CDCl<sub>3</sub>) δ -62.24.

**HRMS** (ESI) *m/z*: [M]<sup>+</sup> Calculated for C<sub>15</sub>H<sub>13</sub>F<sub>3</sub><sup>+</sup> 250.0964; Found 250.0963.

### 1-Methyl-3-(4-trifluoromethyl)benzyl)benzene (synthesis of the minor isomer)

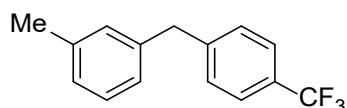

A 16 mL oven-dried glass vial equipped with a stirring bar was charged with 3-methylphenylboronic acid (68 mg, 0.50 mmol, 1.0 equiv.) and sodium carbonate (53 mg, 0.50 mmol, 1.00 equiv.). The vial was sealed with an septum cap and evacuated and refilled with N<sub>2</sub> three times. Dry chloroform (1.25 mL) was then added followed by 4-trifluoromethylbenzylamine (285 mg, 2.00 mmol, 4.00 equiv.) and isoamyl nitrite (335 μL, 2.50 mmol, 5.00 equiv.). The reaction was heated at 60 °C for 24 h. The crude reaction mixture was concentrated and purified by flash column chromatography (hexanes) to yield 1-methyl-3-(4-(trifluoromethyl)benzyl)benzene as a colourless oil (108 mg, 0.43 mmol, 86% yield).

**<sup>1</sup>H NMR** (400 MHz, CDCl<sub>3</sub>) (major isomer) δ 7.65 – 7.57 (m, 2H), 7.40 – 7.34 (m, 2H), 7.31 – 7.25 (m, 1H), 7.17 – 7.09 (m, 1H), 7.10 – 7.04 (m, 2H), 4.07 (s, 2H), 2.41 (s, 3H).

**<sup>13</sup>C NMR** (101 MHz, CDCl<sub>3</sub>) (major isomer) δ 145.52 (q, *J* = 1.5 Hz), 140.06, 138.46, 129.86, 129.32, 128.70, 127.38, 126.12, 125.52 (q, *J* = 3.8 Hz), 124.51 (q, *J* = 271.8 Hz), 41.81, 21.50. (signal of the aromatic quaternary carbon *ipso* to CF<sub>3</sub> is missing due to overlap)

**<sup>19</sup>F NMR** (377 MHz, CDCl<sub>3</sub>) δ -62.26.

**HRMS** (ESI) *m/z*: [M]<sup>+</sup> Calculated for C<sub>15</sub>H<sub>13</sub>F<sub>3</sub><sup>+</sup> 250.0964; Found 250.0961.

### 7.4. Probing pathway 1 for the minor isomer formation

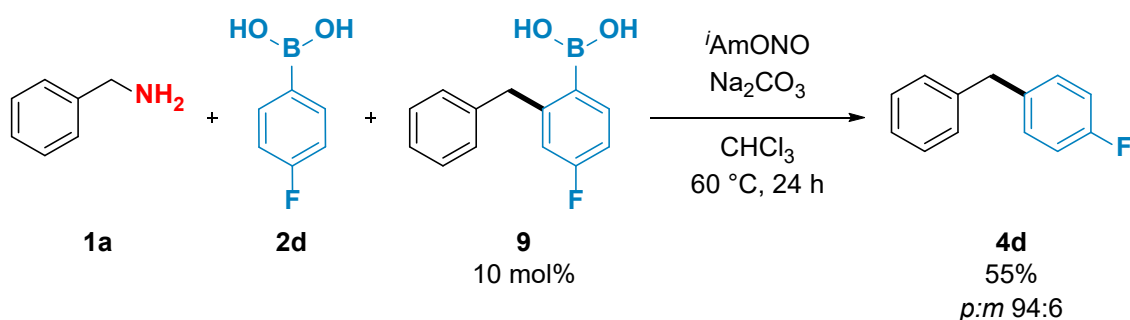

### 1-Benzyl-4-fluorobenzene

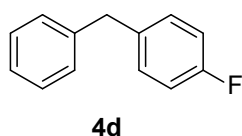



A 16 mL oven-dried glass vial equipped with a stirring bar was charged with 4-fluorophenylboronic acid (70 mg, 0.50 mmol, 1.0 equiv.), (2-benzyl-4-fluorophenyl)boronic acid (12 mg, 0.05 mmol, 0.10 equiv.) and sodium carbonate (53 mg, 0.50 mmol, 1.00 equiv.). The vial was sealed with a septum cap and evacuated and refilled with N<sub>2</sub> three times. Dry chloroform (1.25 mL) was then added followed by benzylamine (218  $\mu$ L, 2.00 mmol, 4.00 equiv.) and isoamyl nitrite (335  $\mu$ L, 2.50 mmol, 5.00 equiv.). The reaction was heated at 60 °C for 24 h. The crude reaction mixture was concentrated and purified by flash column chromatography (hexanes) to yield products 1-benzyl-4-fluorobenzene and 1-benzyl-3-fluorobenzene as a colourless oil (52 mg, 0.28 mmol, 55% yield, 94:6 *p:m* isomer ratio).

### 7.5. Probing pathway 2 for the minor isomer formation

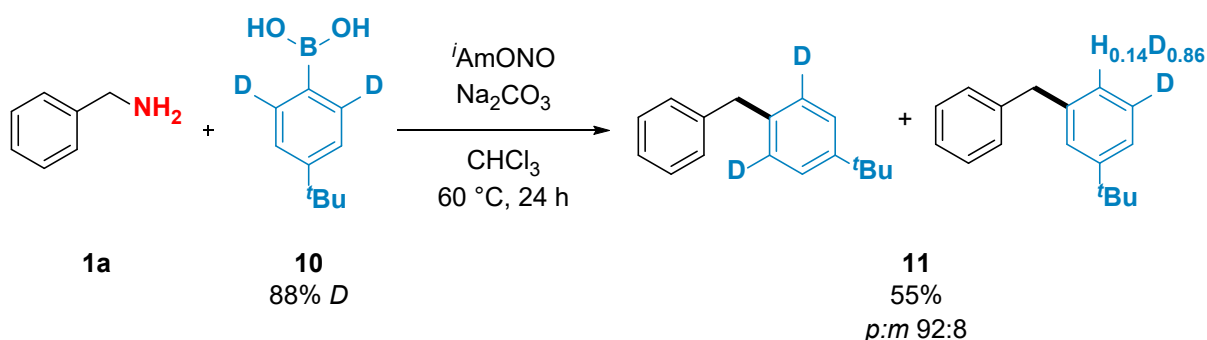

### 1-Benzyl-(4-(*tert*-butyl)benzene-2,6-*d*<sub>2</sub>) and 1-benzyl-3-(*tert*-butyl)benzene-5,6-*d*<sub>2</sub>

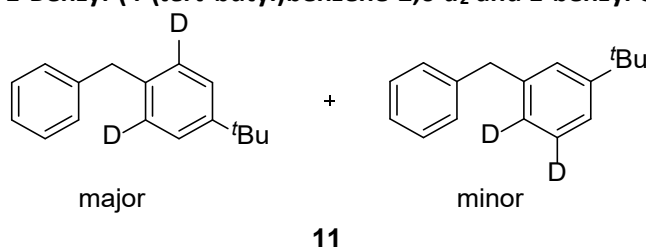

A 16 mL oven-dried glass vial equipped with a stirring bar was charged with (4-(*tert*-butyl)phenyl)-2,6-*d*<sub>2</sub>boronic acid (90 mg, 0.50 mmol, 1.0 equiv.) and sodium carbonate (53 mg, 0.50 mmol, 1.00 equiv.). The vial was sealed with a septum cap and evacuated and refilled with N<sub>2</sub> three times. Anhydrous chloroform (1.25 mL) was then added followed by benzylamine (218  $\mu$ L, 2.00 mmol, 4.00 equiv.) and isoamyl nitrite (335  $\mu$ L, 3.00 mmol, 5.00 equiv.). The reaction was heated at 60 °C for 24 h. The crude reaction mixture was concentrated and purified by flash column chromatography (hexanes) to yield a mixture of 1-benzyl-4-(*tert*-butyl)benzene-2,6-*d*<sub>2</sub> and 1-benzyl-3-(*tert*-butyl)benzene-5,6-*d*<sub>2</sub> as a colourless oil (62 mg, 0.28 mmol, 55% yield, *para:meta* = 92:8).

**<sup>1</sup>H NMR** (600 MHz, CDCl<sub>3</sub>)  $\delta$  7.42 – 7.32 (m, 4H), 7.32 – 7.26 (m, 3H, major), 7.24 – 7.19 (m, 3H, minor), 4.08 (s, 2H, minor), 4.05 (s, 2H, major), 1.40 (s, 9H, minor), 1.40 (s, 9H, major).

**<sup>2</sup>H NMR** (92 MHz, CDCl<sub>3</sub>)  $\delta$  7.35, 7.17, 7.03.

**<sup>13</sup>C NMR** (151 MHz, CDCl<sub>3</sub>)  $\delta$  151.39 (minor), 148.95, 148.88 (minor), 141.42, 140.66 (minor), 138.13 (minor), 138.05, 129.11, 129.05 (minor), 128.65 (minor), 128.57, 128.50 – 128.13 (m), 126.13, 125.48 (minor), 125.37, 123.04 (minor), 41.53 (minor), 41.48, 34.75 (minor), 34.50, 31.55.

**HRMS** (ESI) *m/z*: [M+Na]<sup>+</sup> Calculated for C<sub>17</sub>H<sub>18</sub>D<sub>2</sub><sup>+</sup> 226.1685; Found 226.1683.

Incorporation of the deuterium in the *para* position to the *tert*-butyl isomer was calculated as follows: The integral of the two hydrogens at the benzylic position (4.08 ppm) for the minor isomer was set to

2.00 and compared to the integral in the range of 7.13 – 7.05 ppm (area ratio 0.14). Deuterium incorporation in this position was hence calculated to be  $((2/1)-0.14)*100\% = 86\%$ .

In the HMBC spectrum, coupling was observed between the hydrogen at 7.13 – 7.05 ppm with the benzylic carbon (42.33 ppm) but not with the quaternary carbon of the *tert*-butyl group (34.75 ppm) or the quaternary aromatic carbon with *tert*-butyl group attached (151.39 ppm), therefore the peak at 7.13 – 7.05 ppm has been assigned to the hydrogen *para* instead of *ortho* to the *tert*-butyl group.

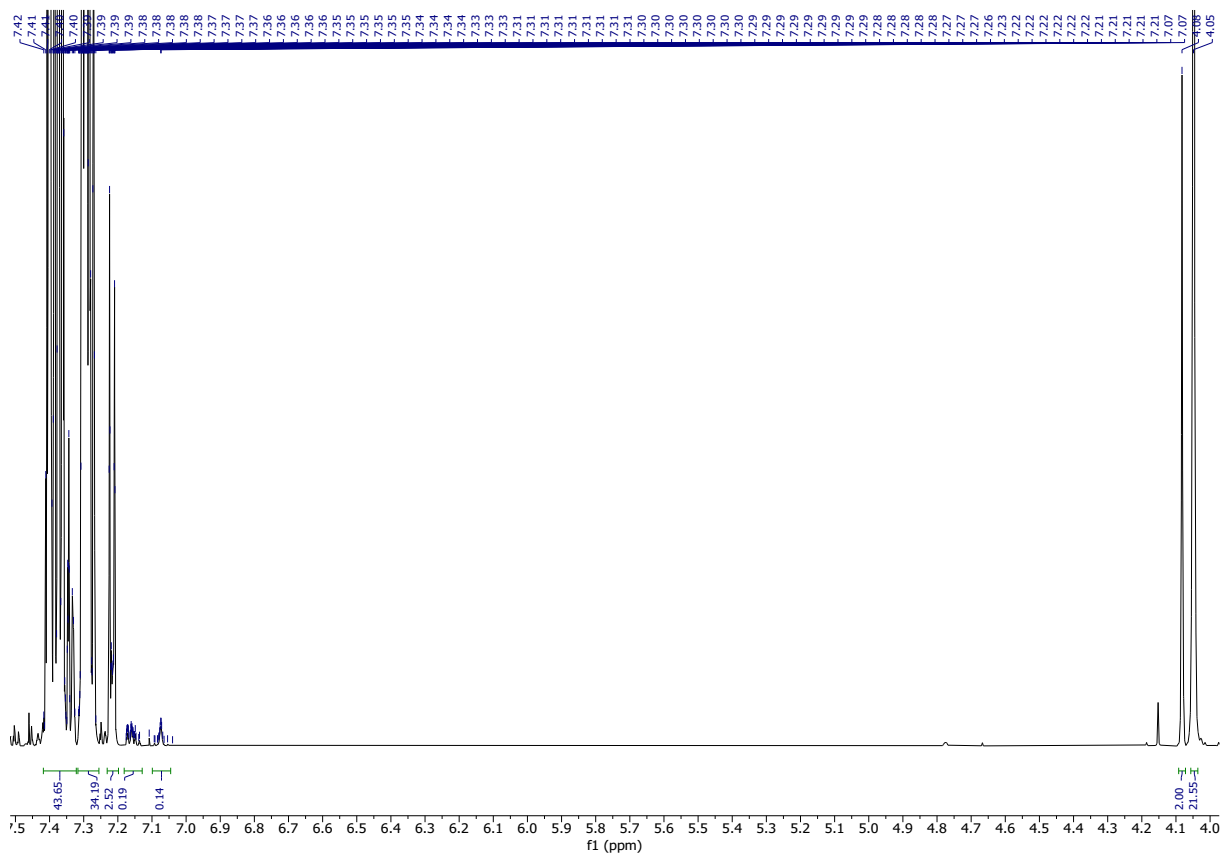

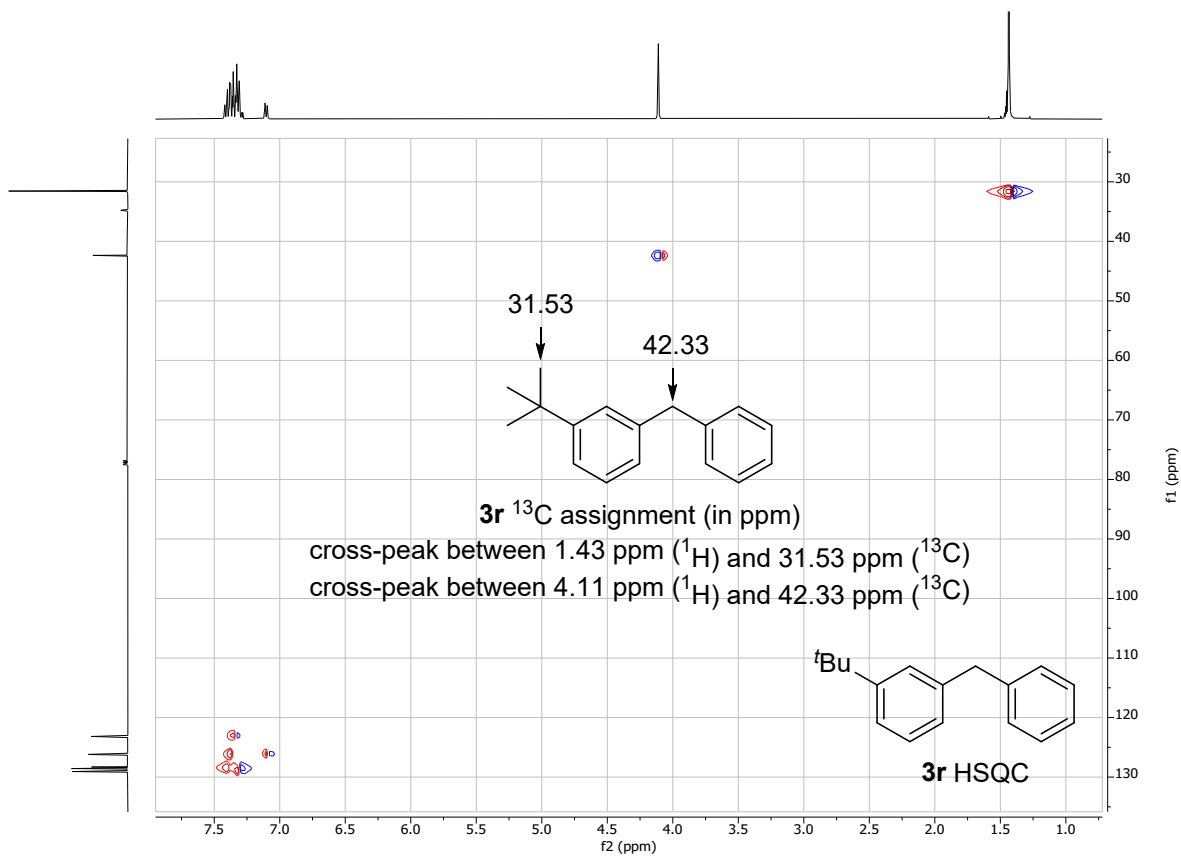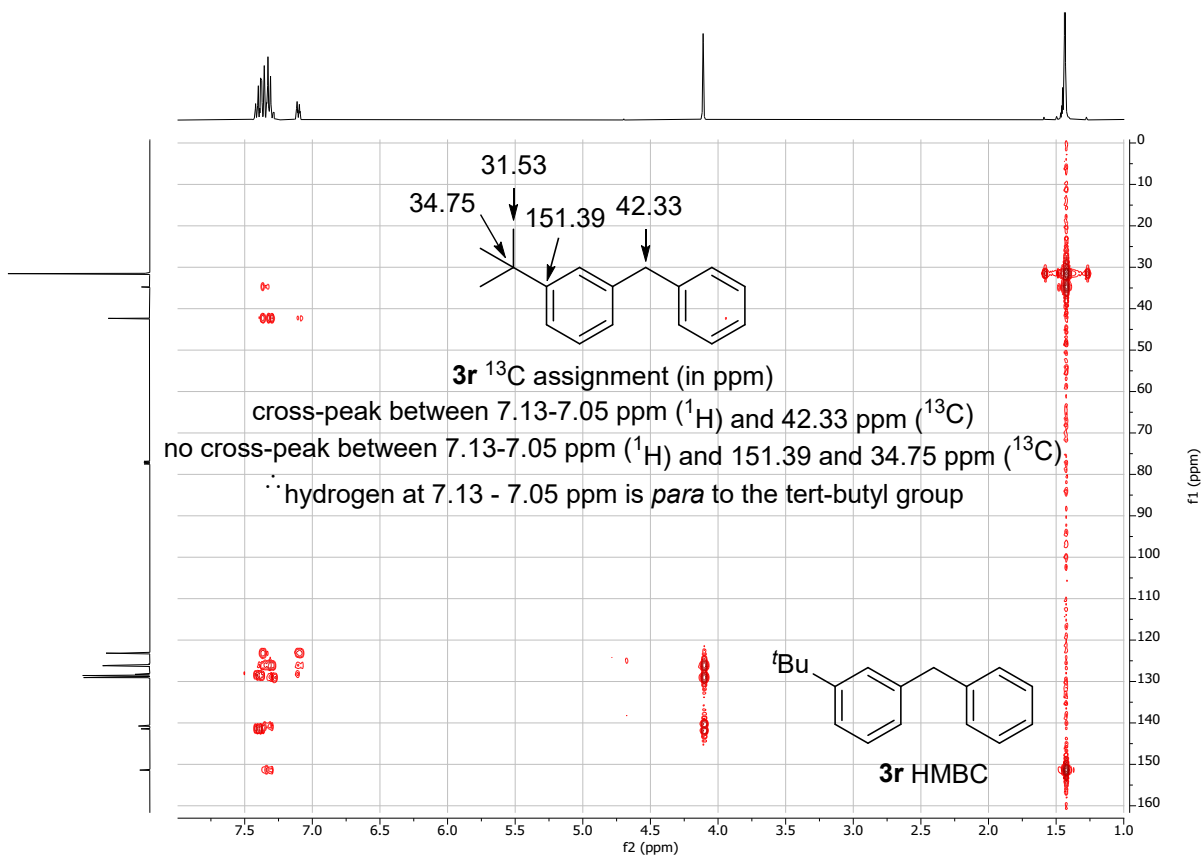

## 8. NMR spectra

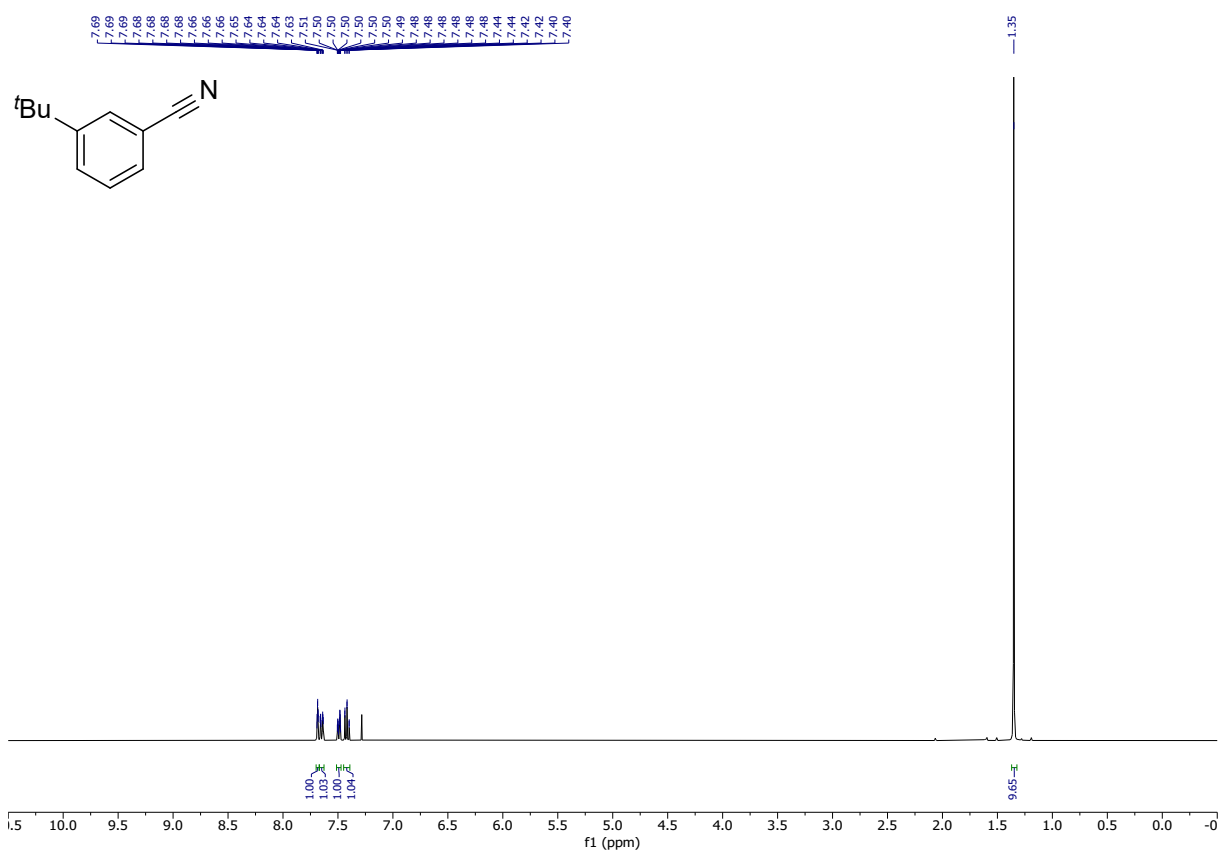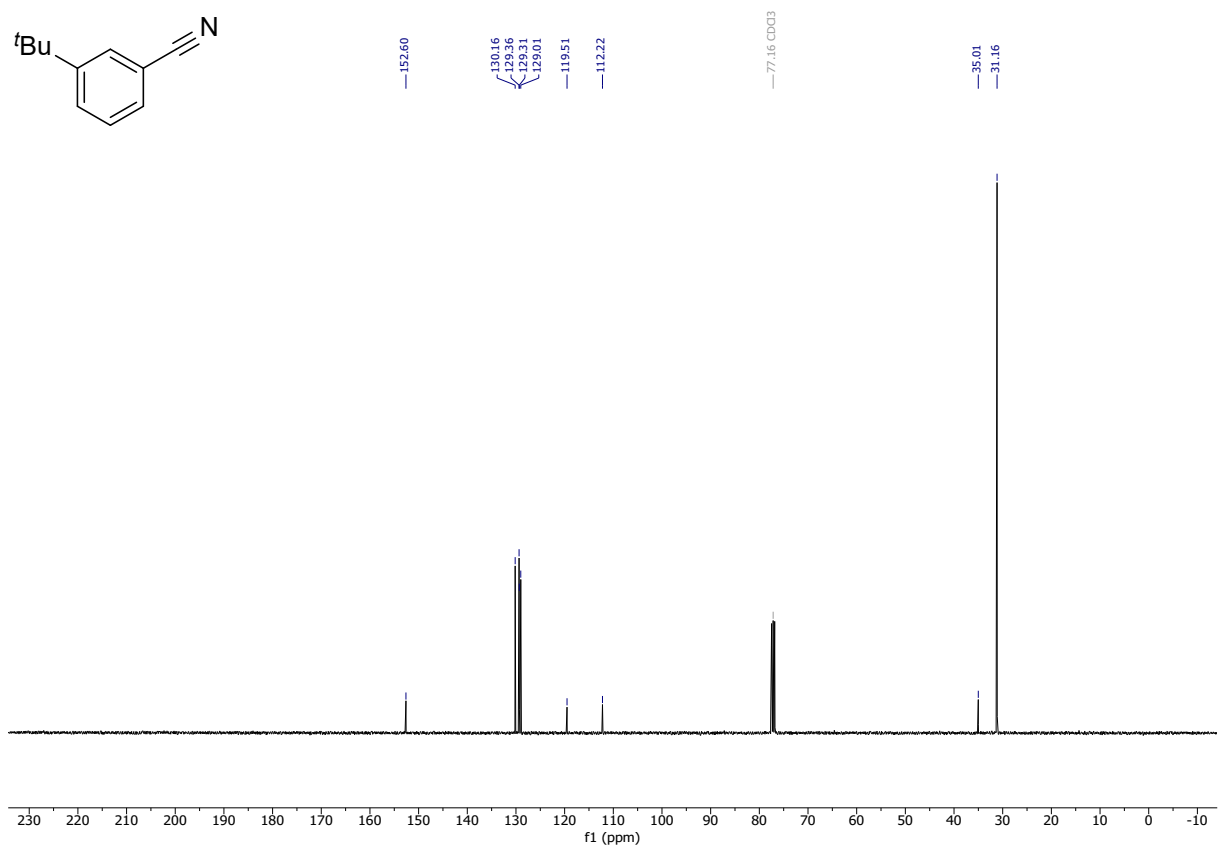

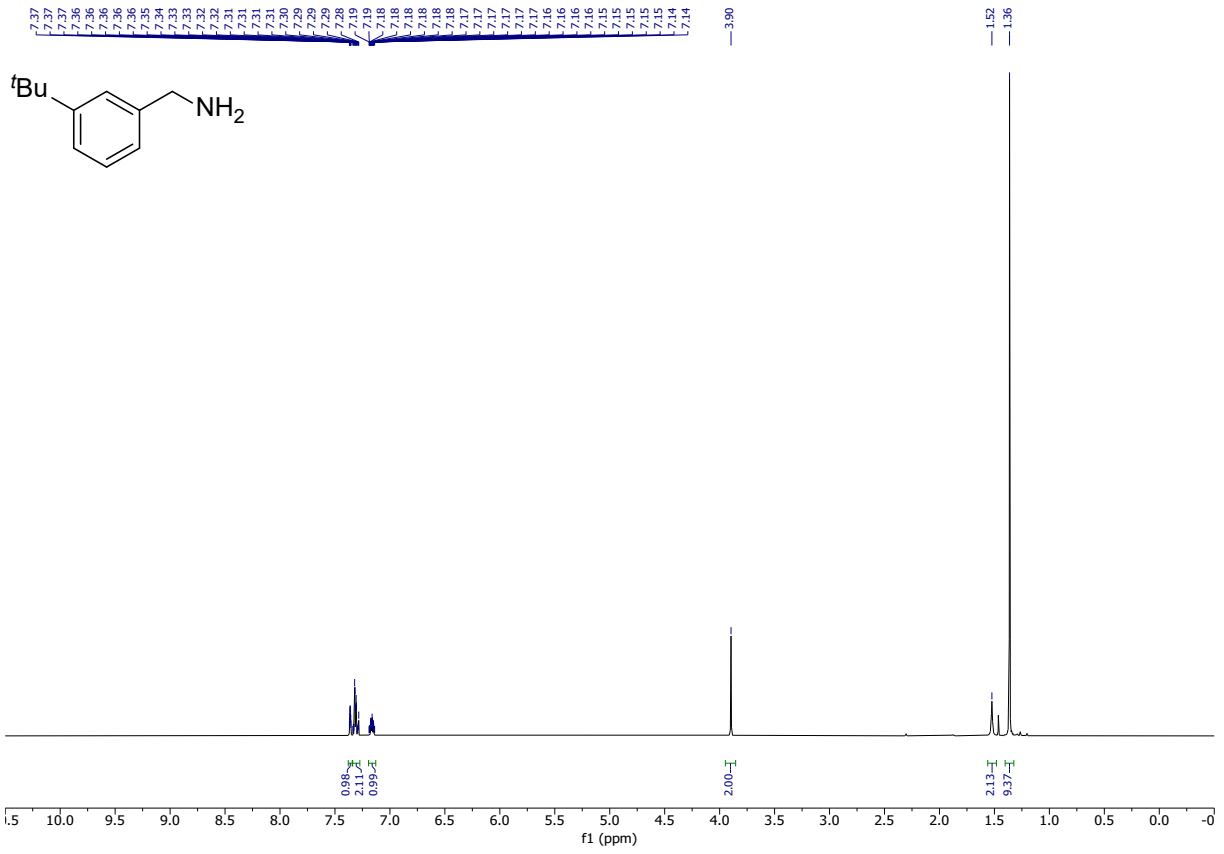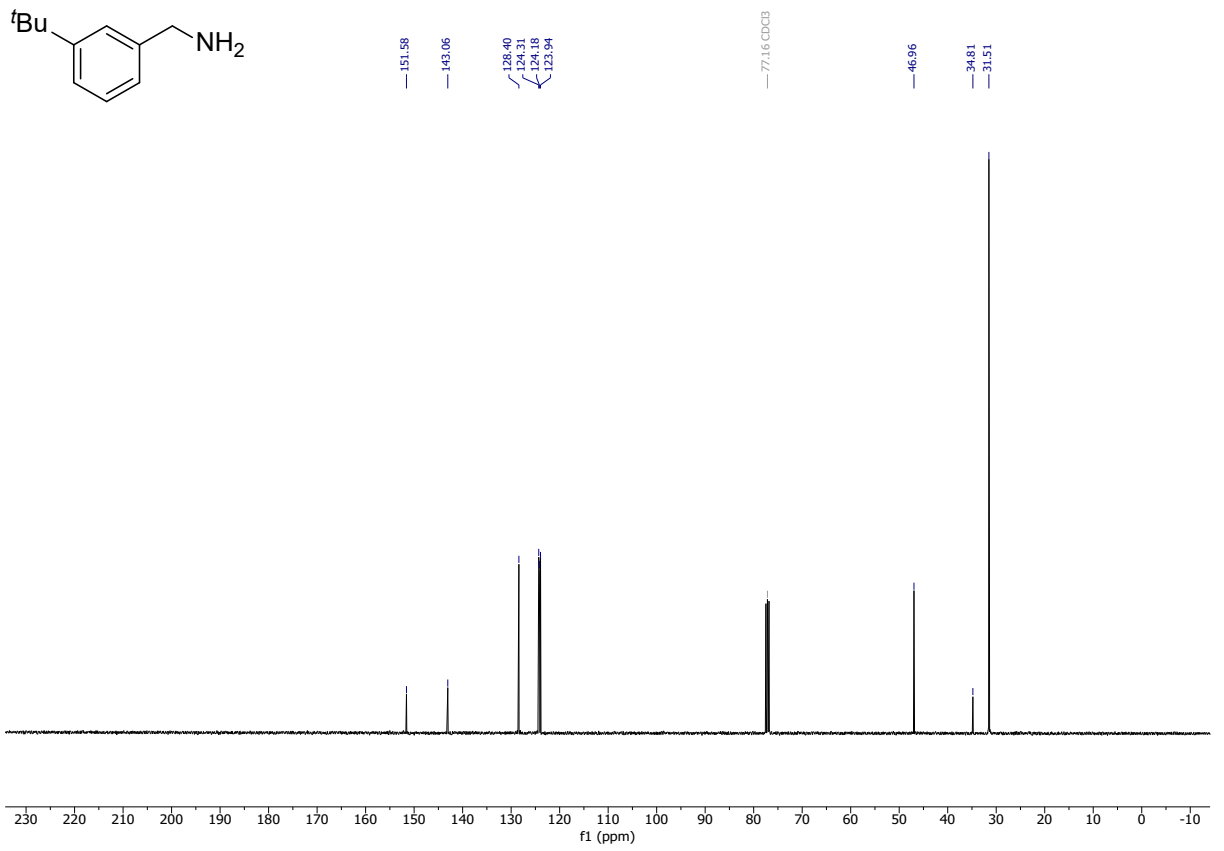

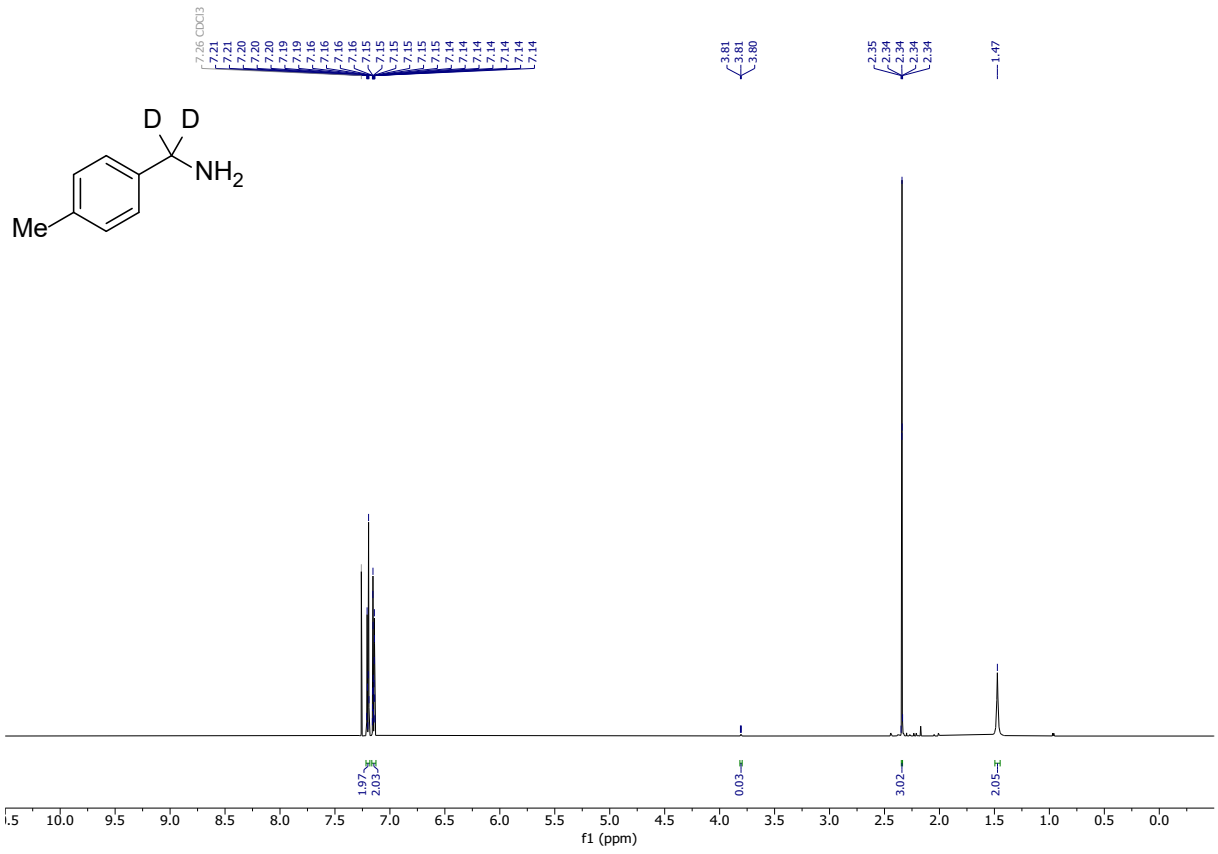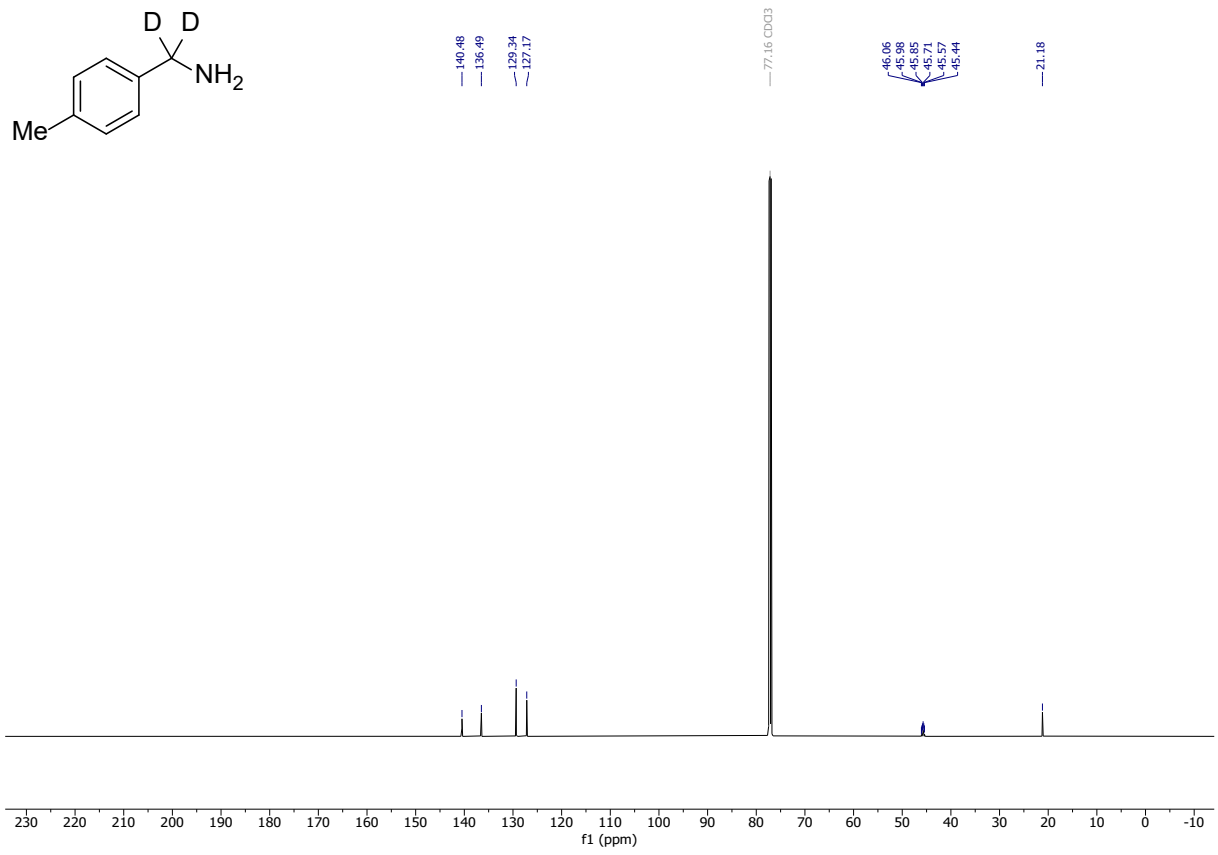

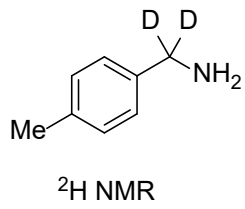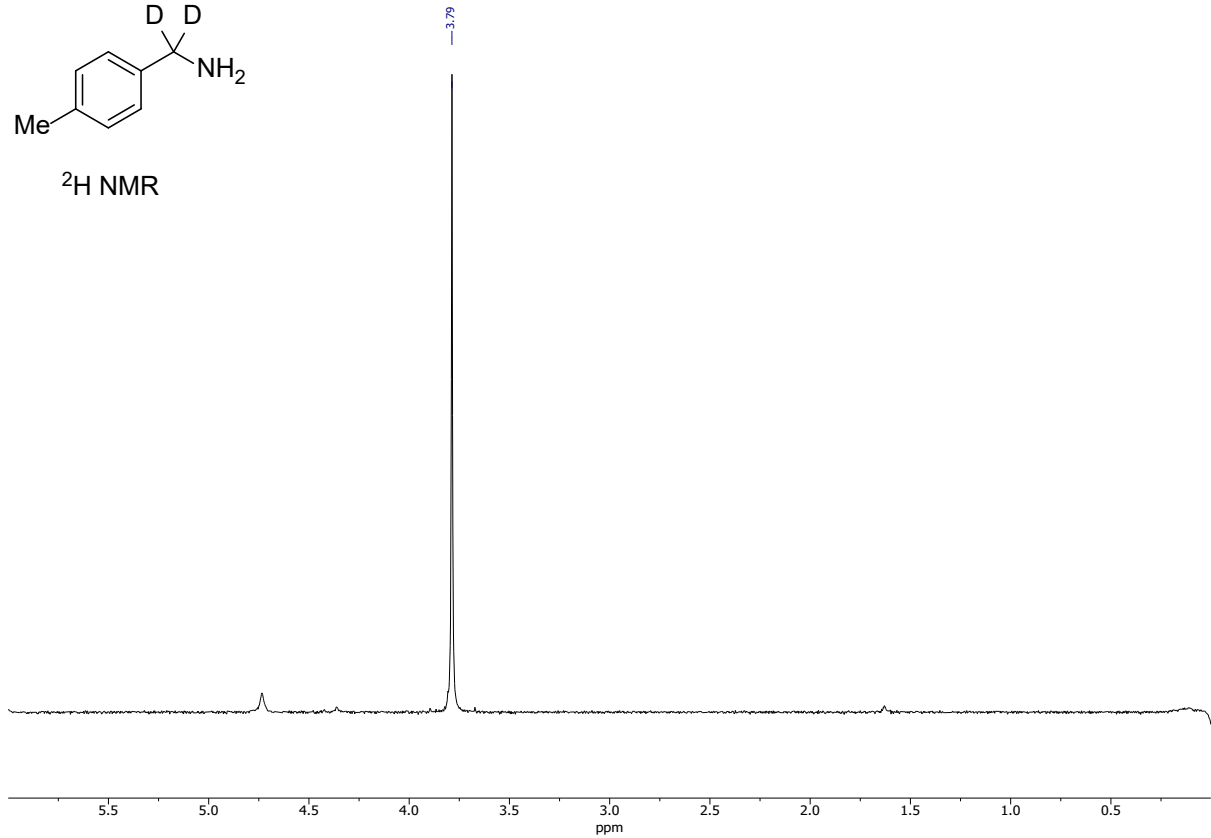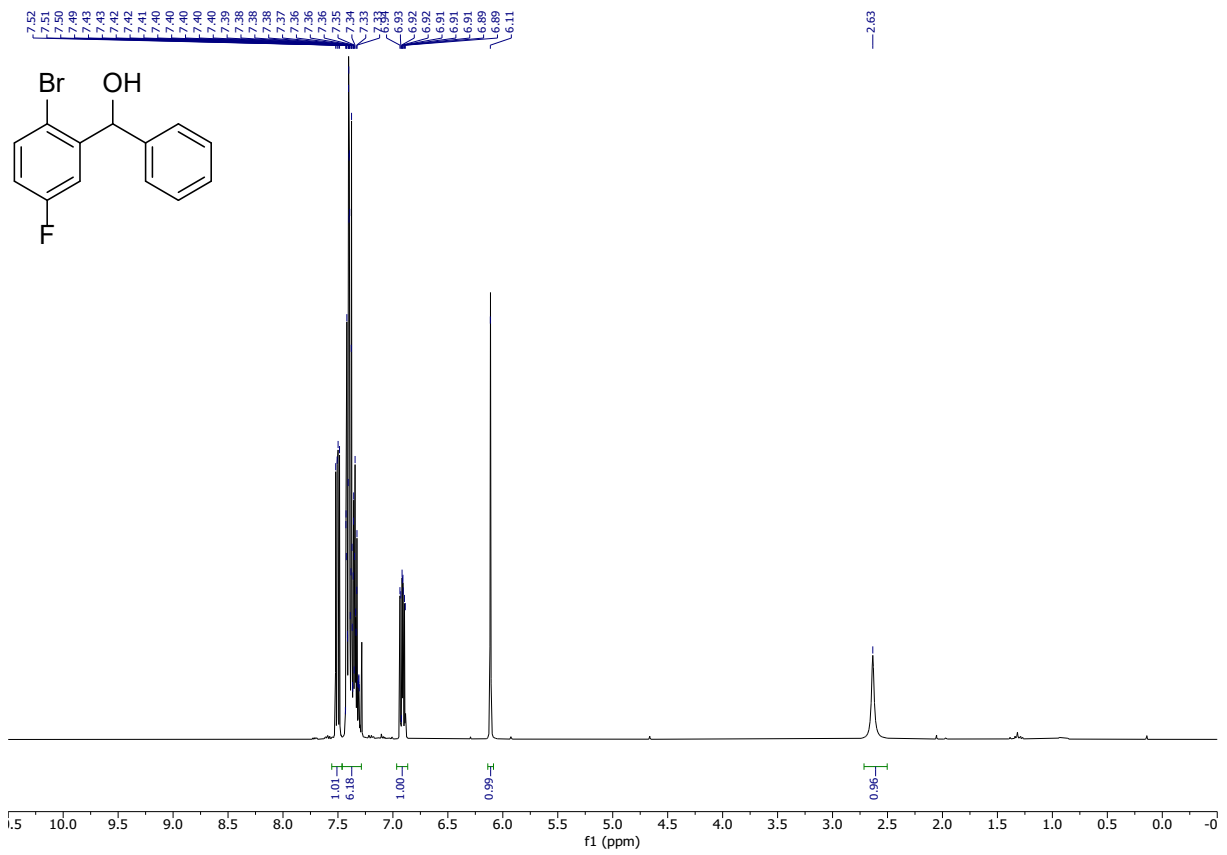

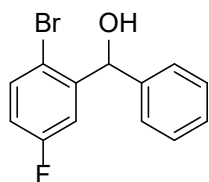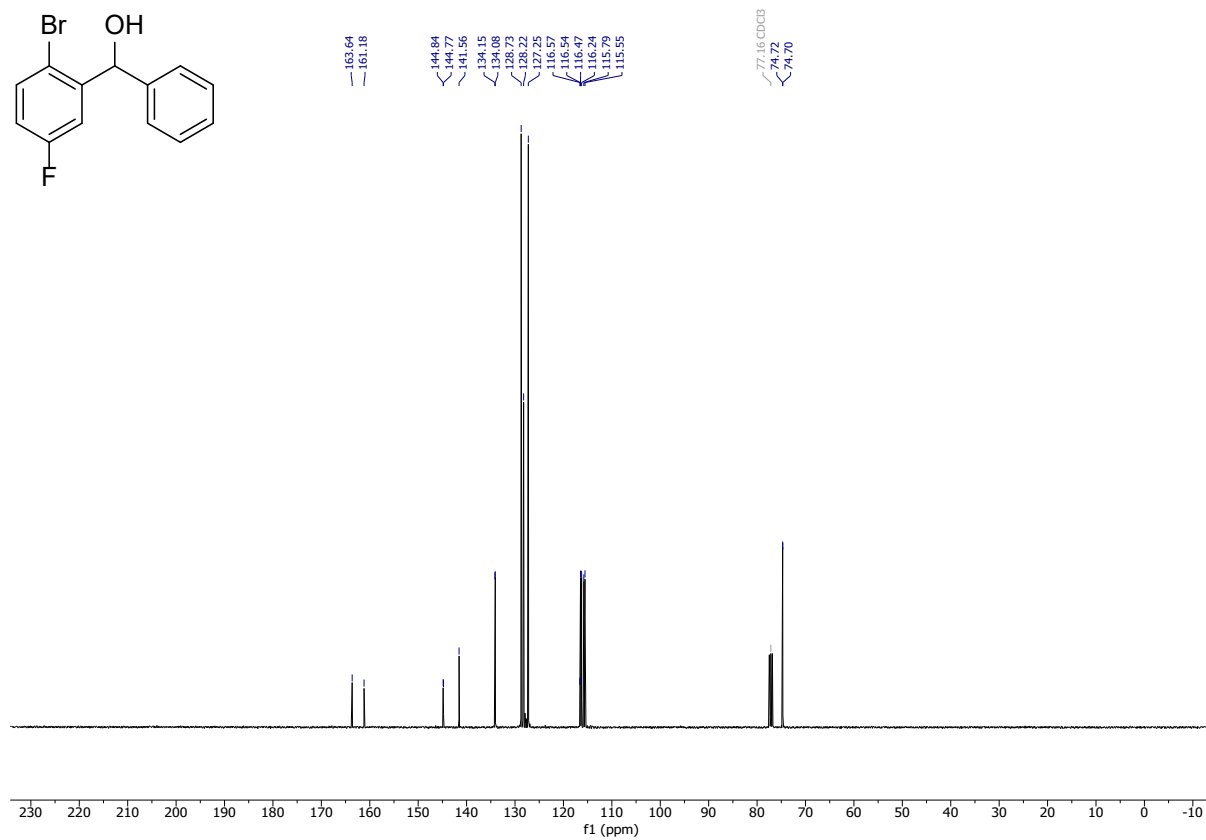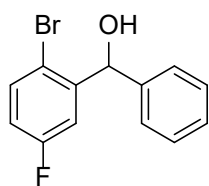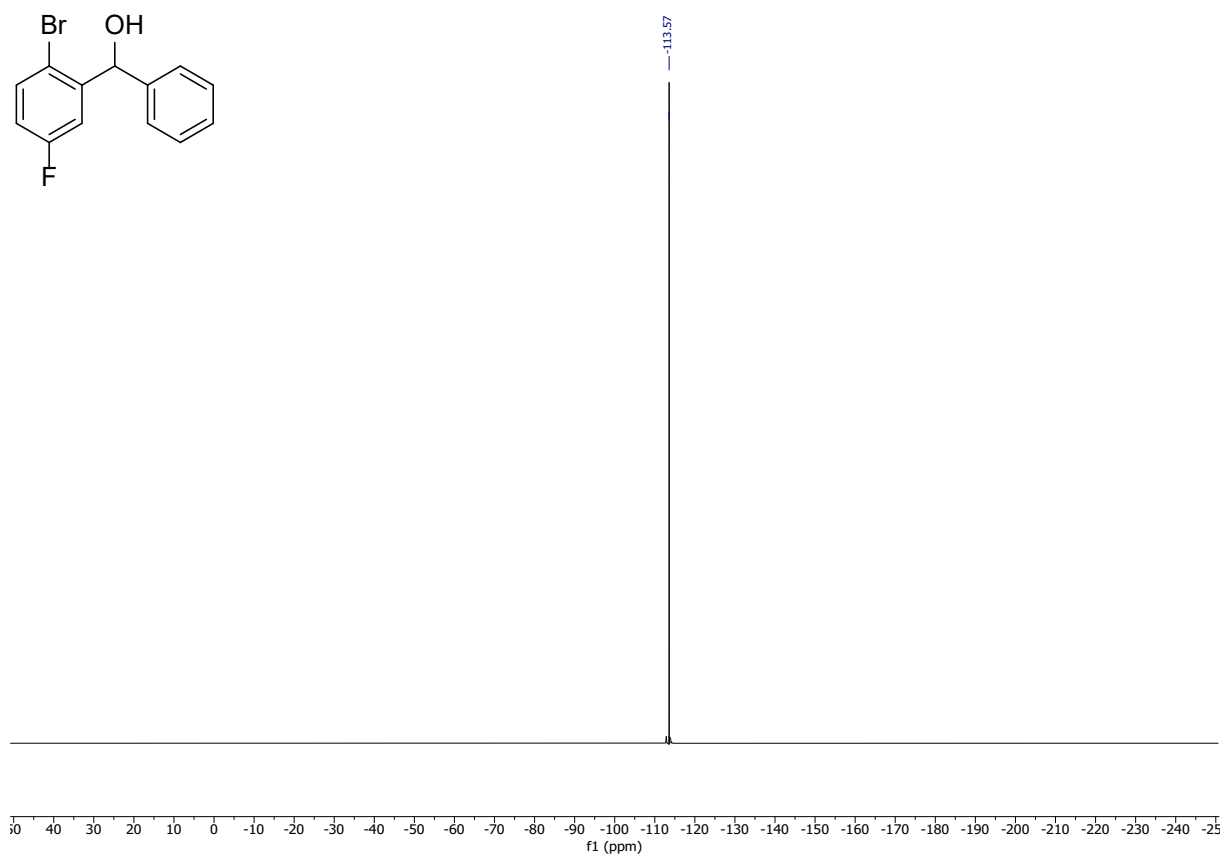





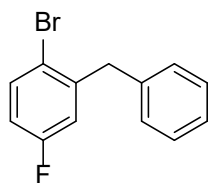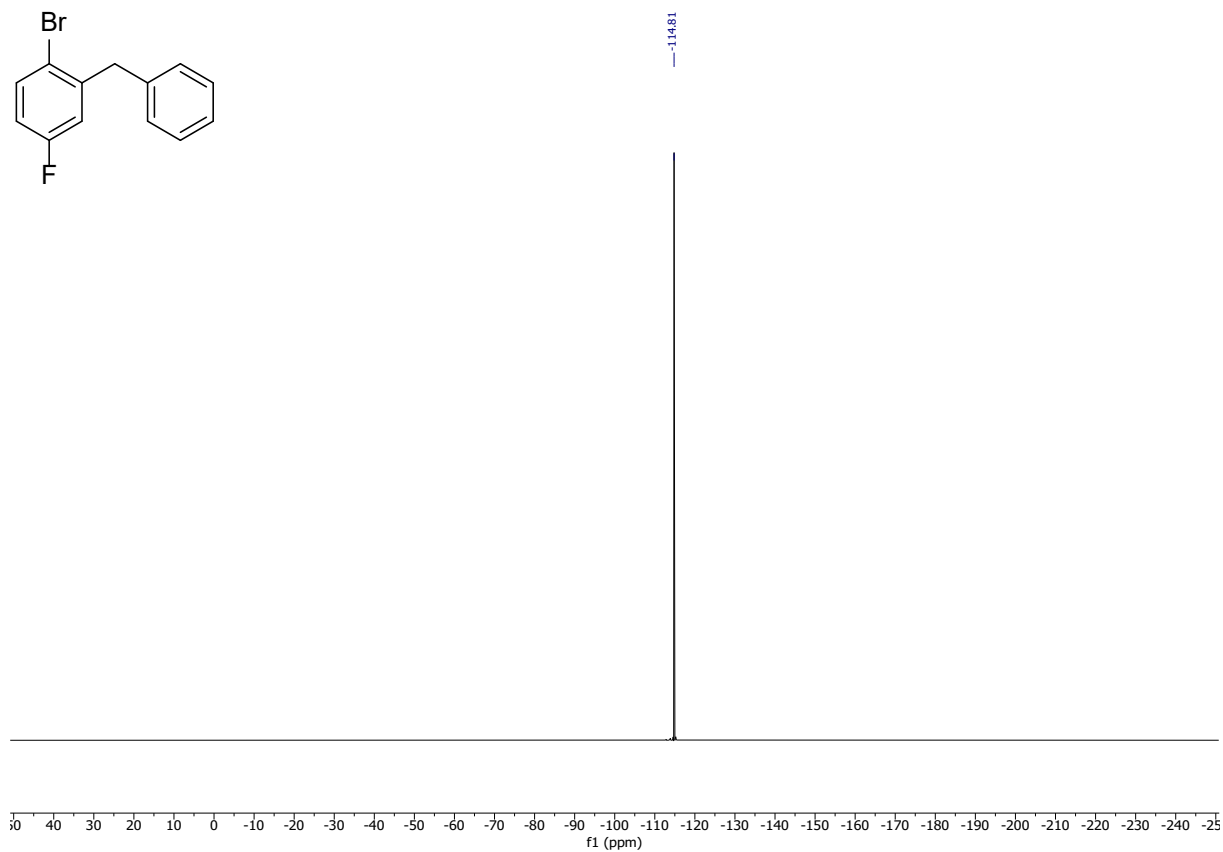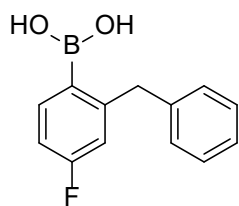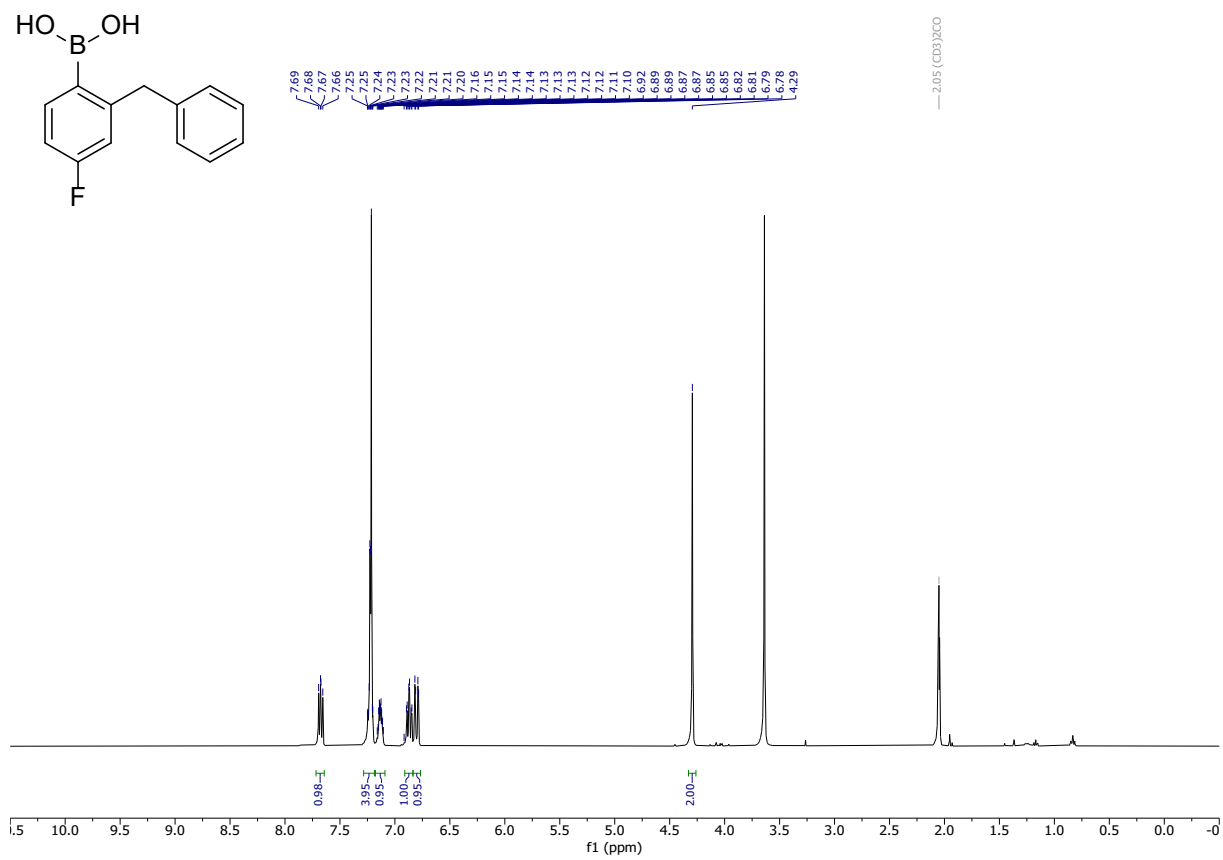

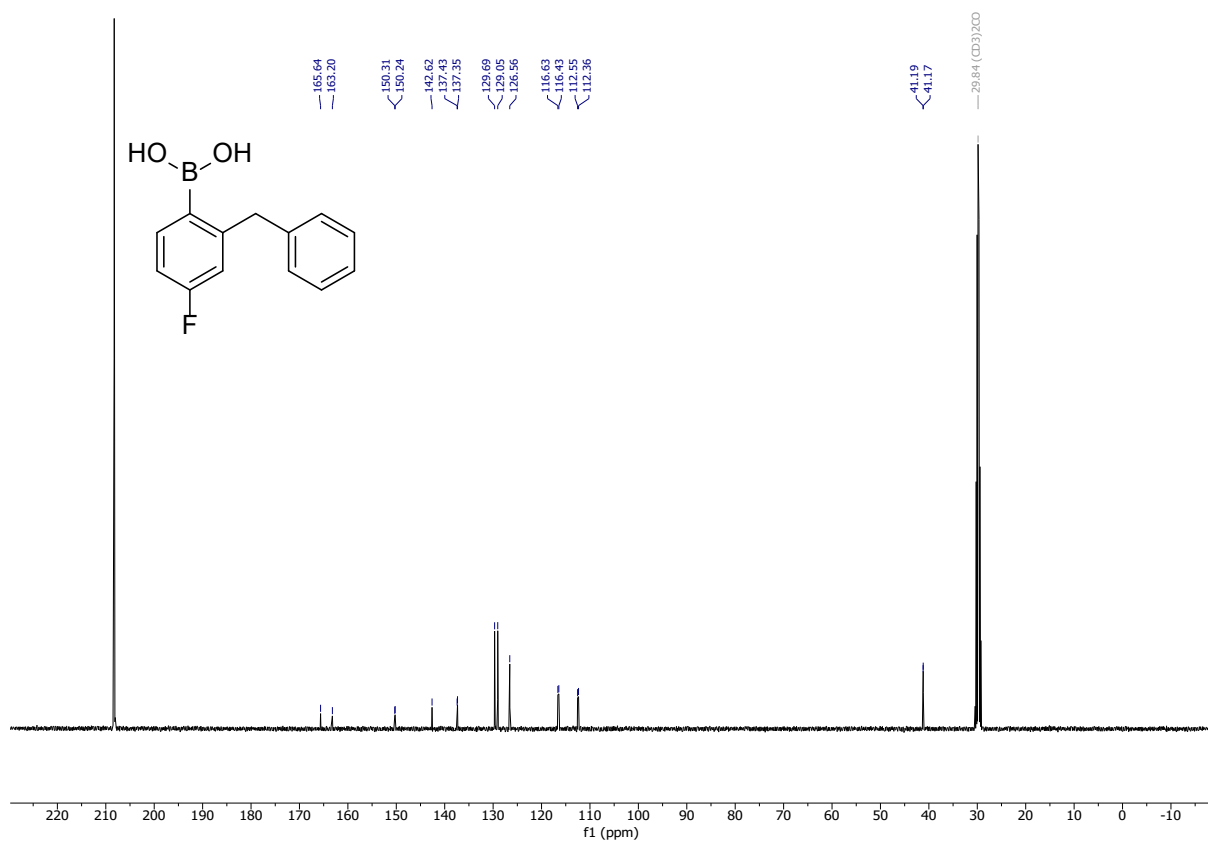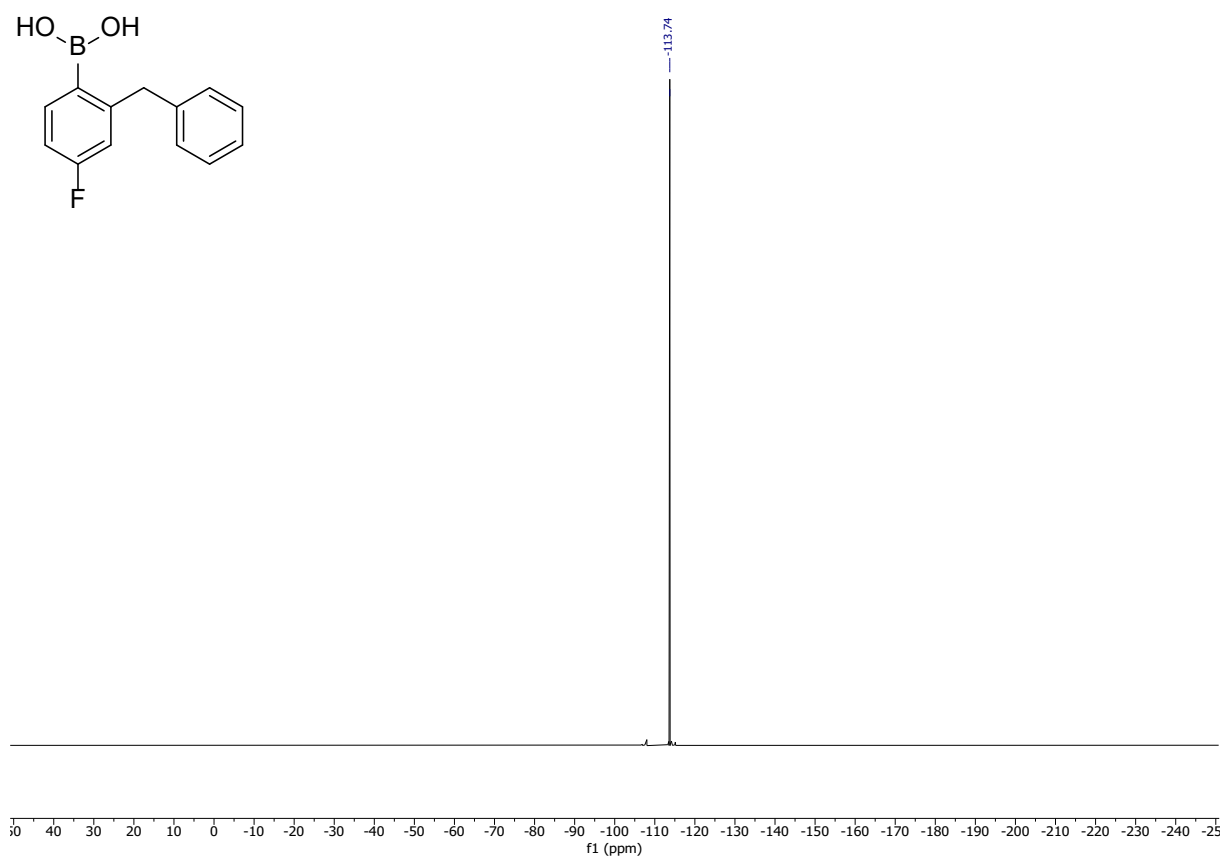

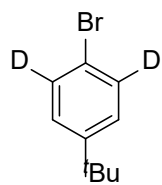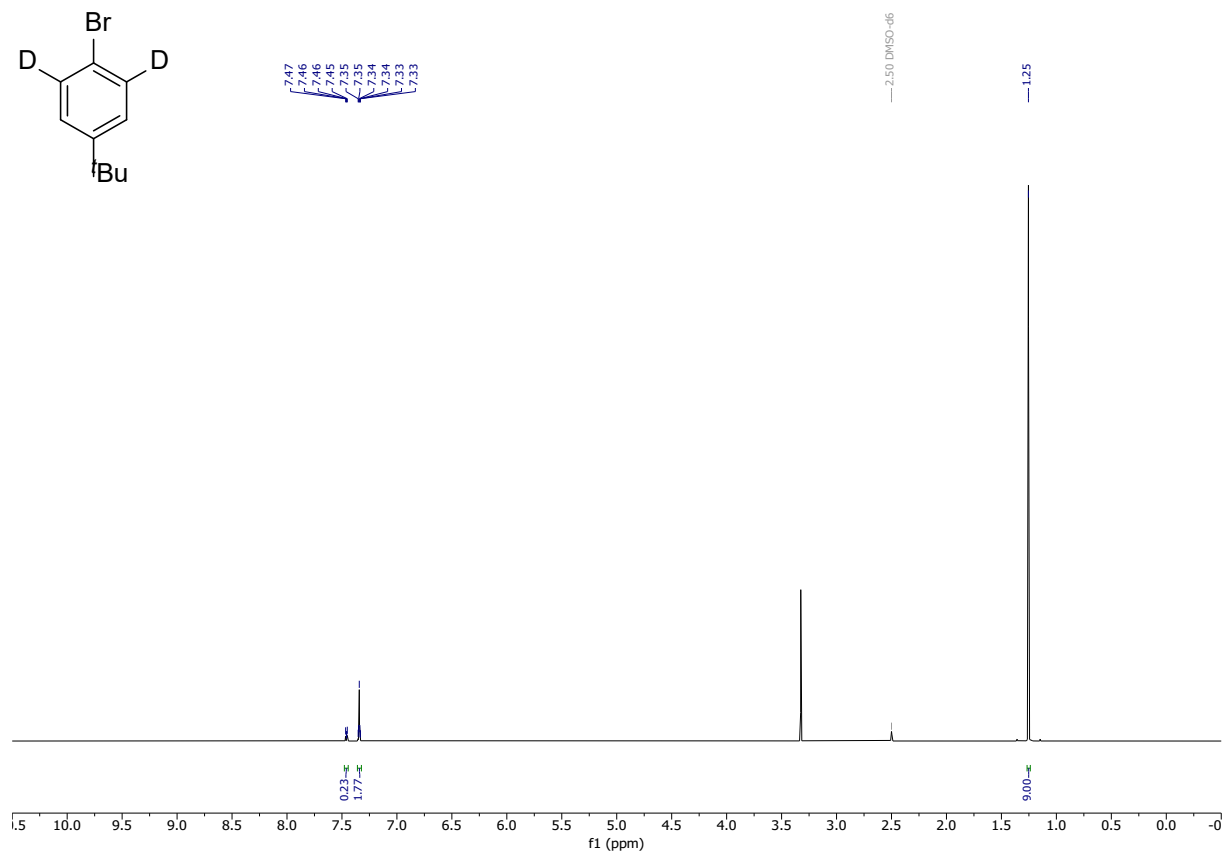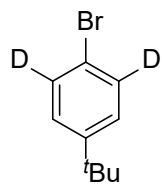

$^2\text{H}$  NMR

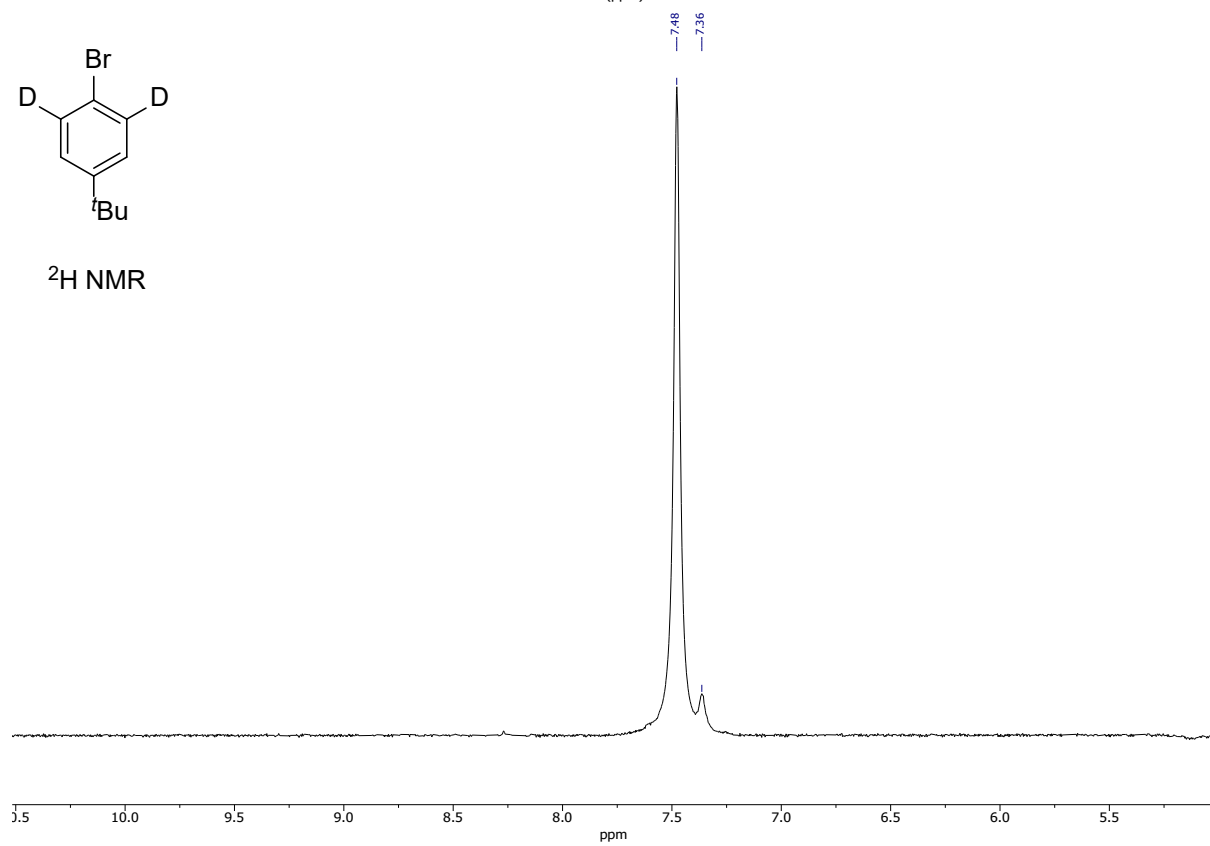

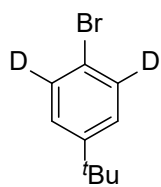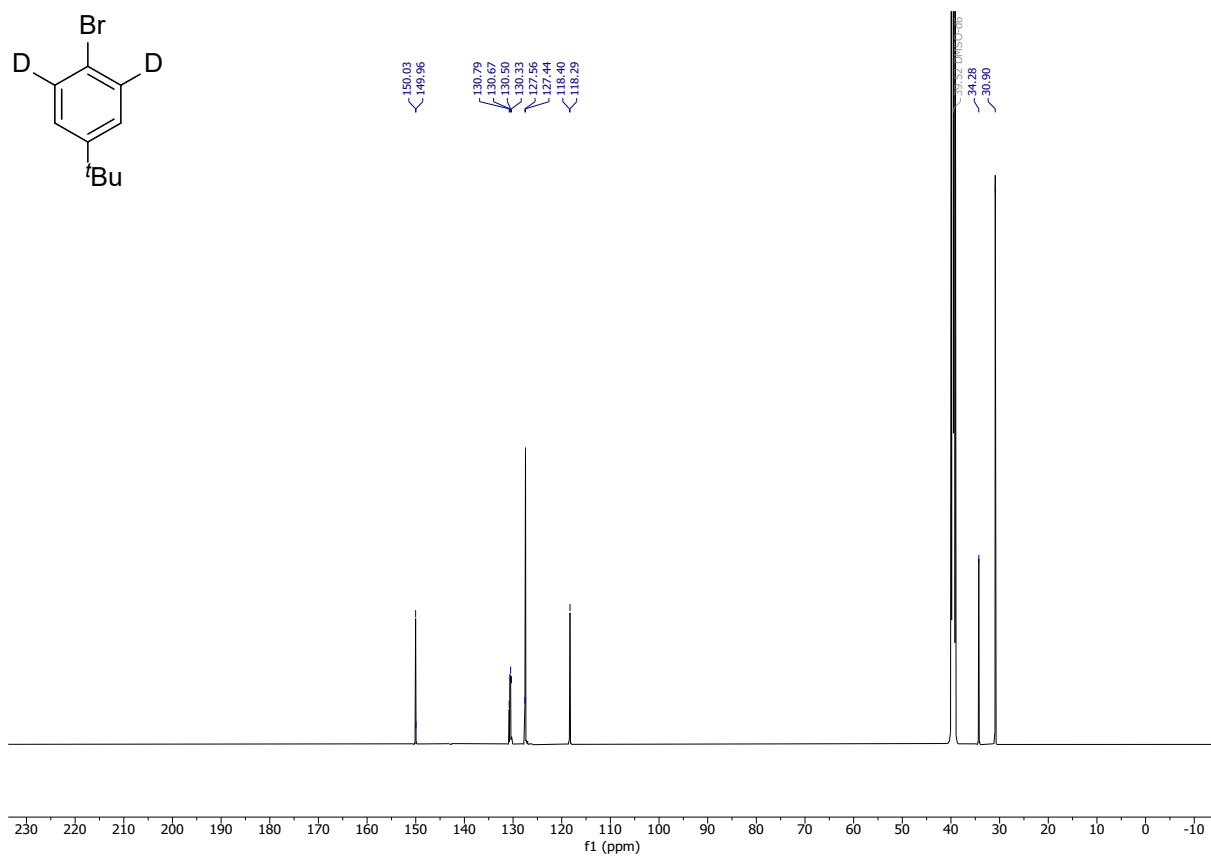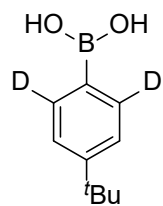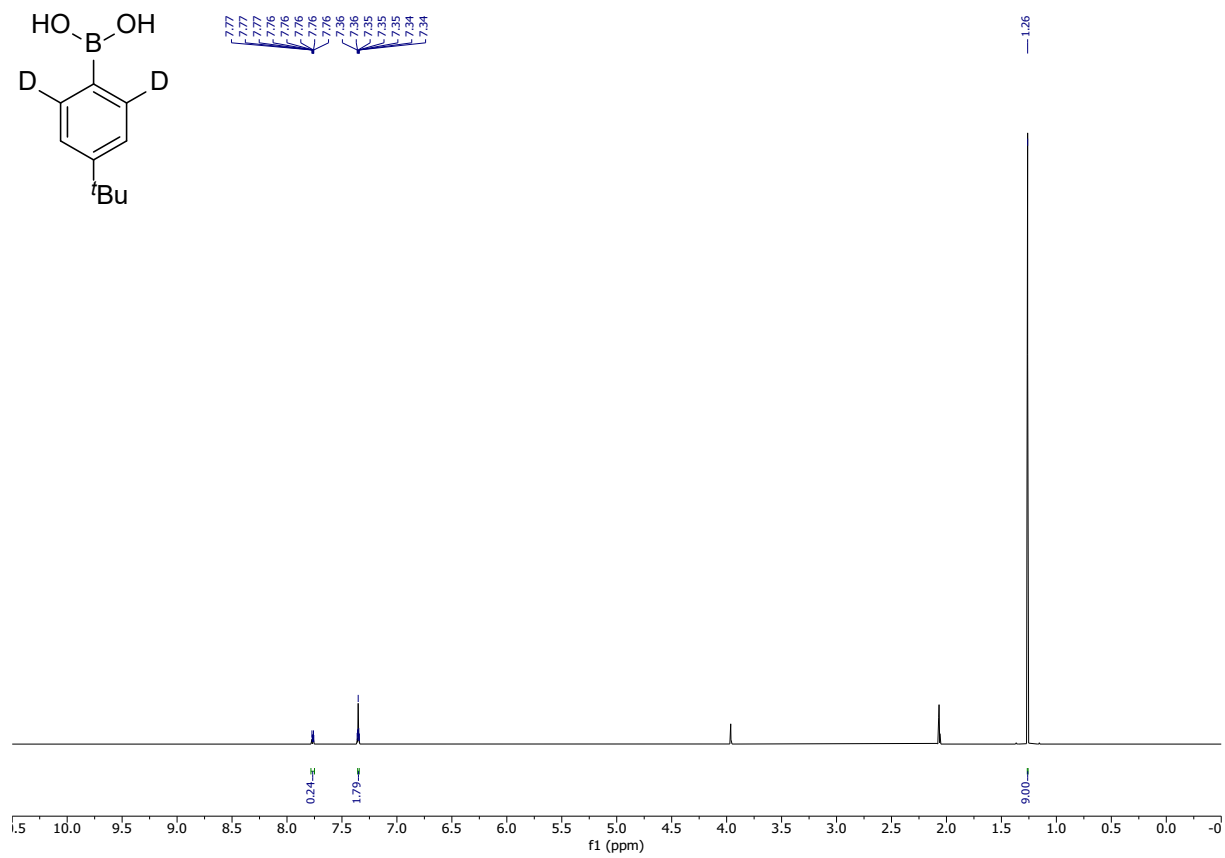

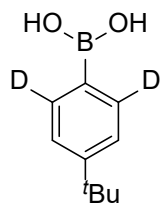

$^2\text{H}$  NMR

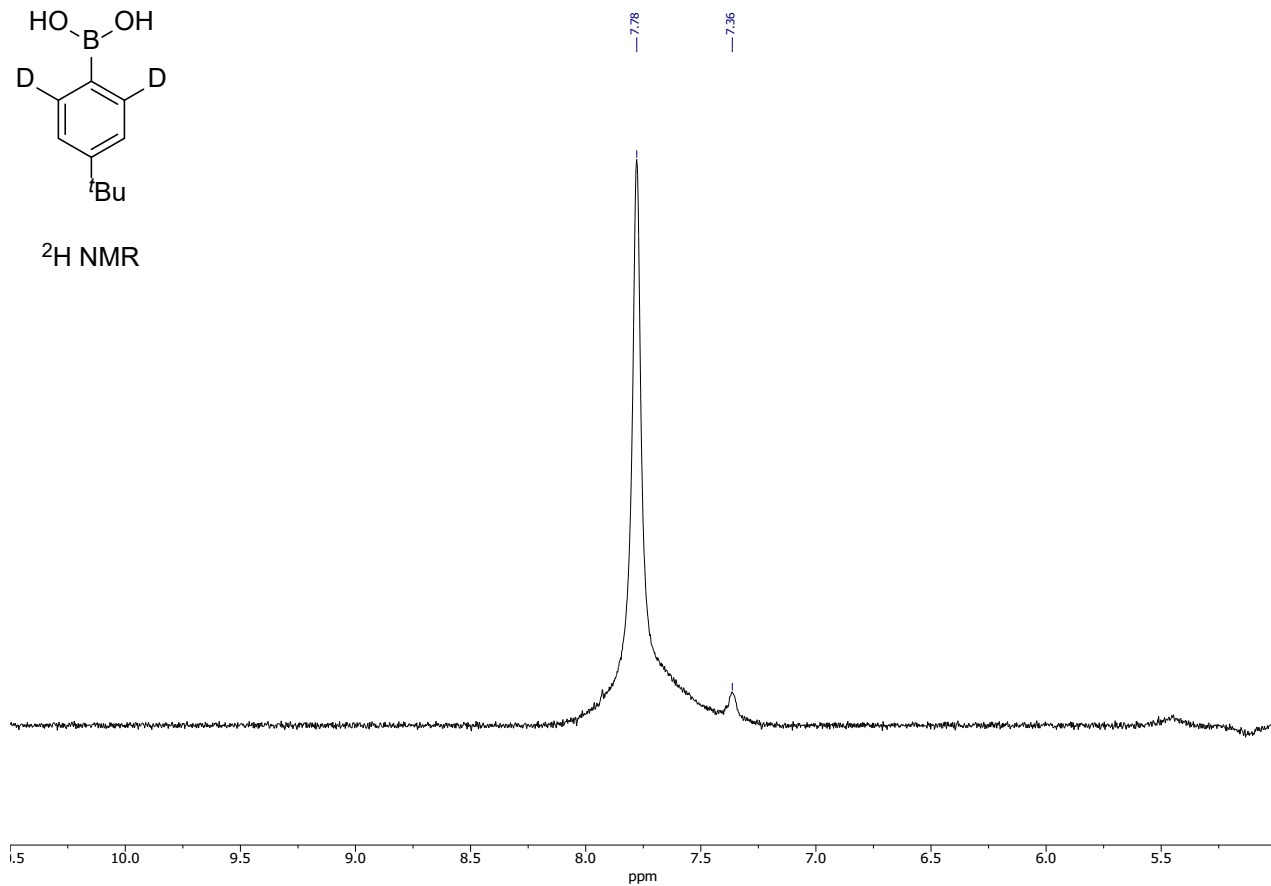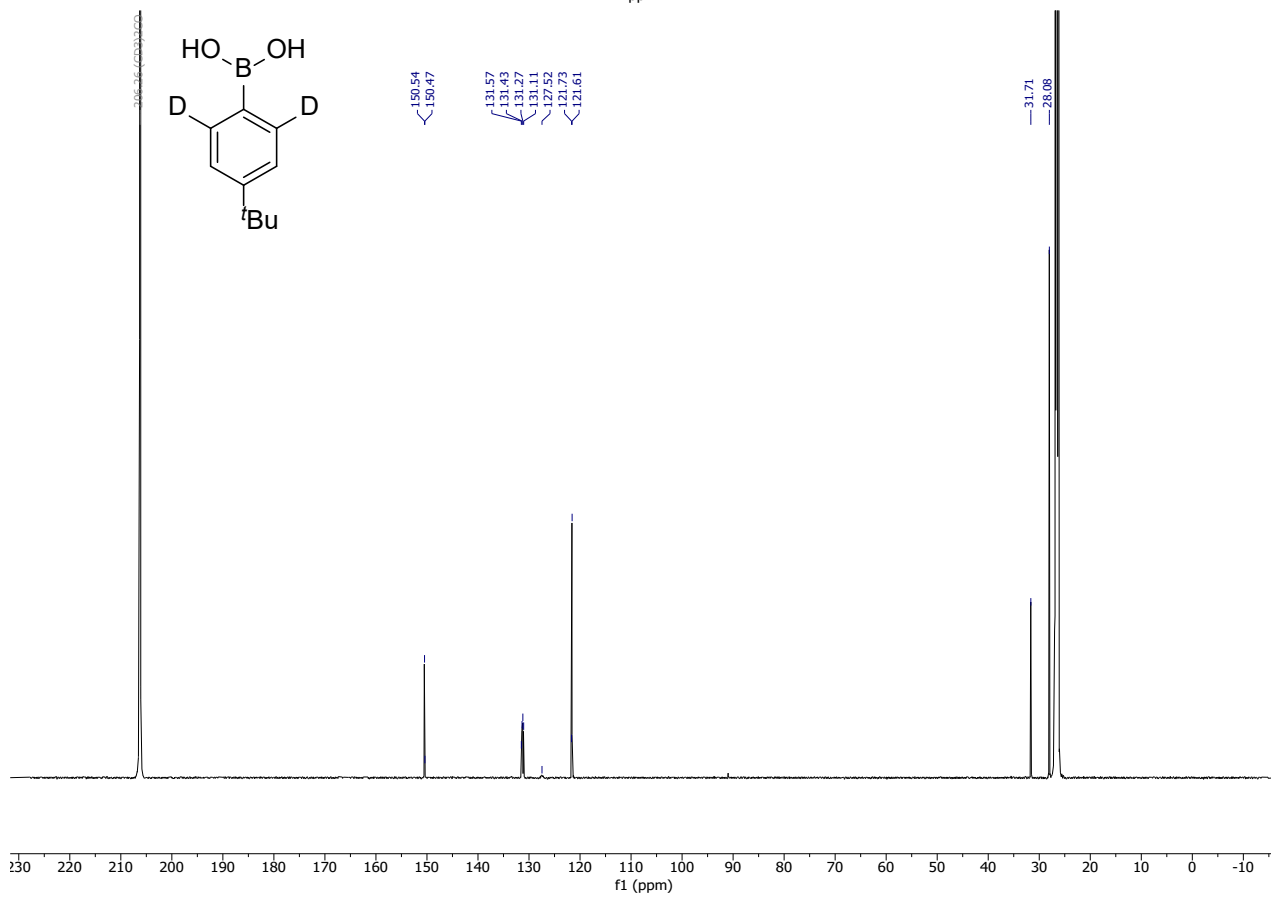



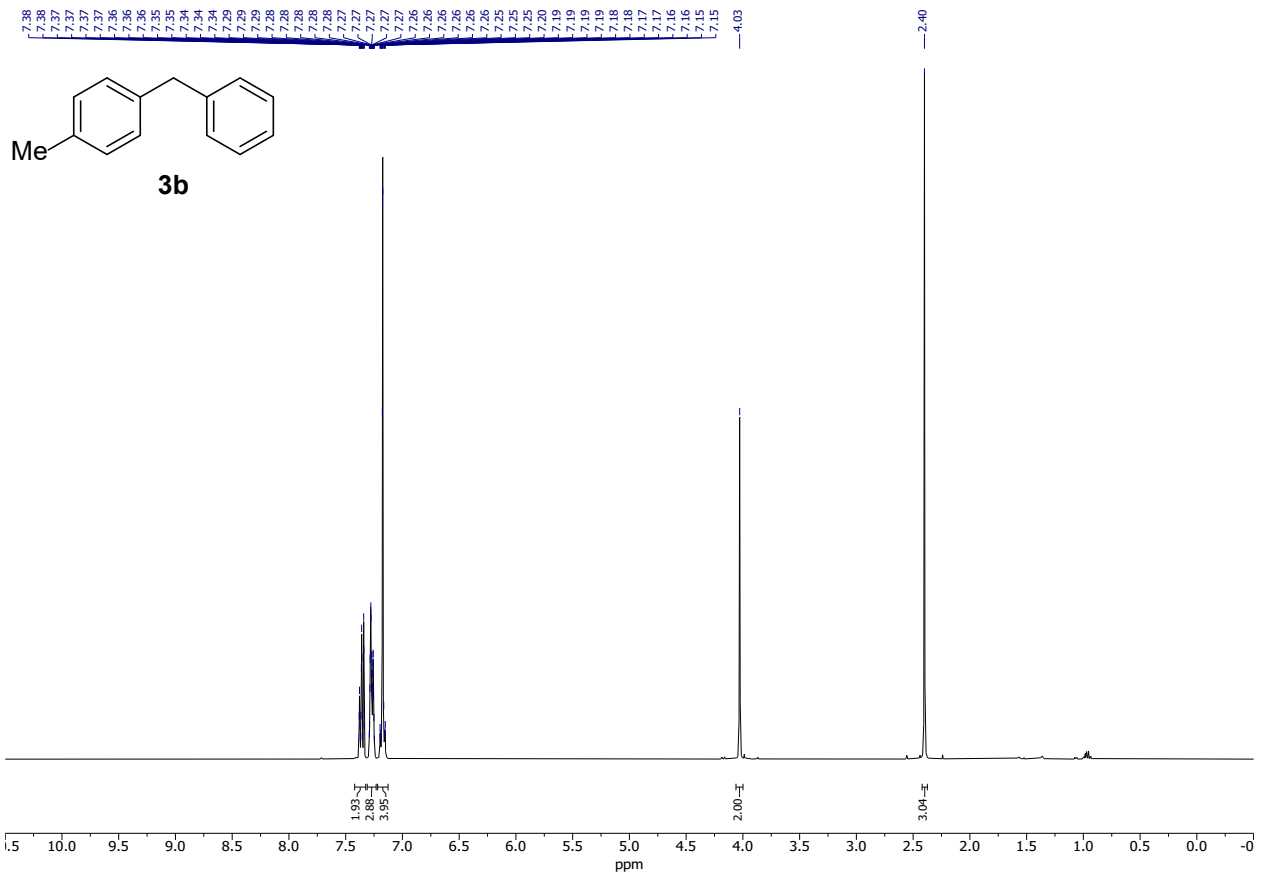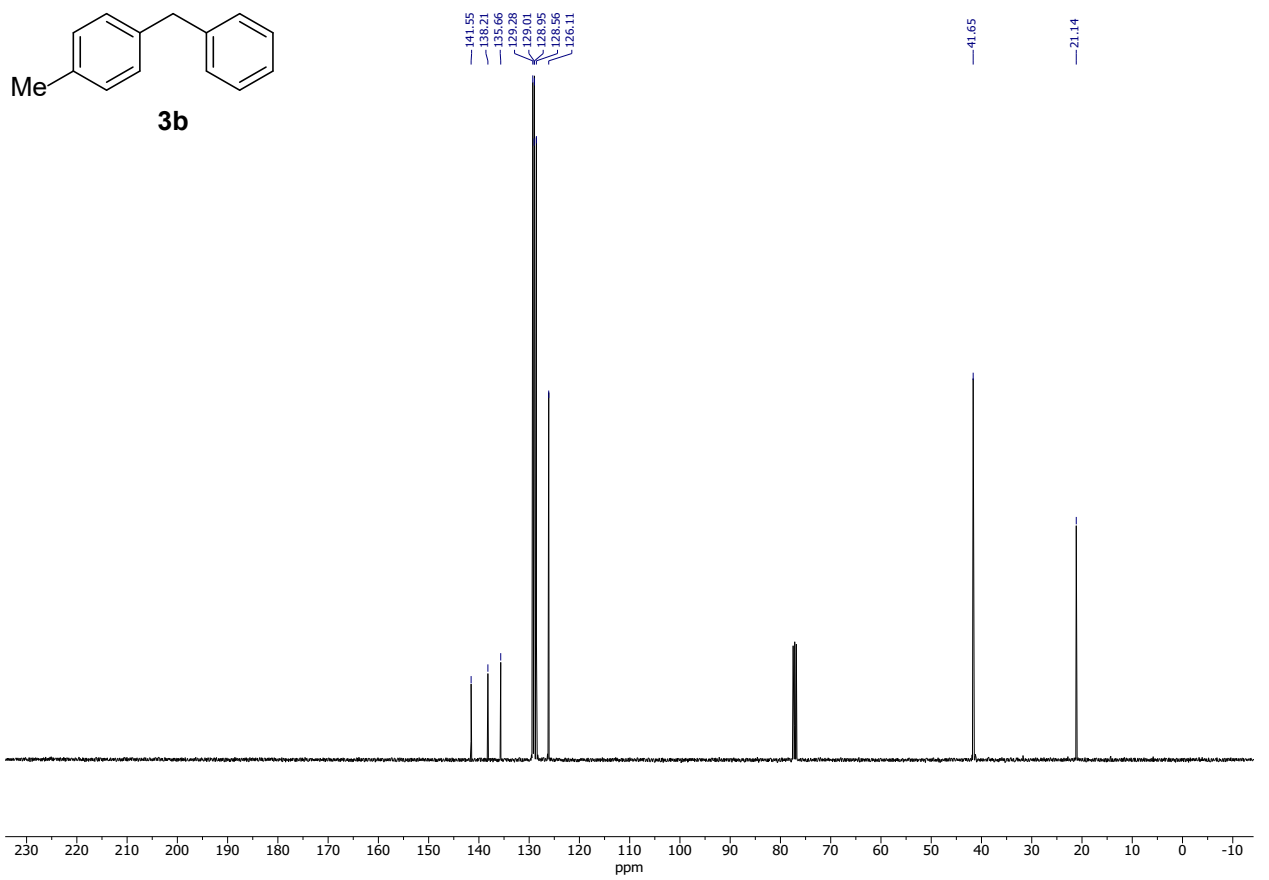



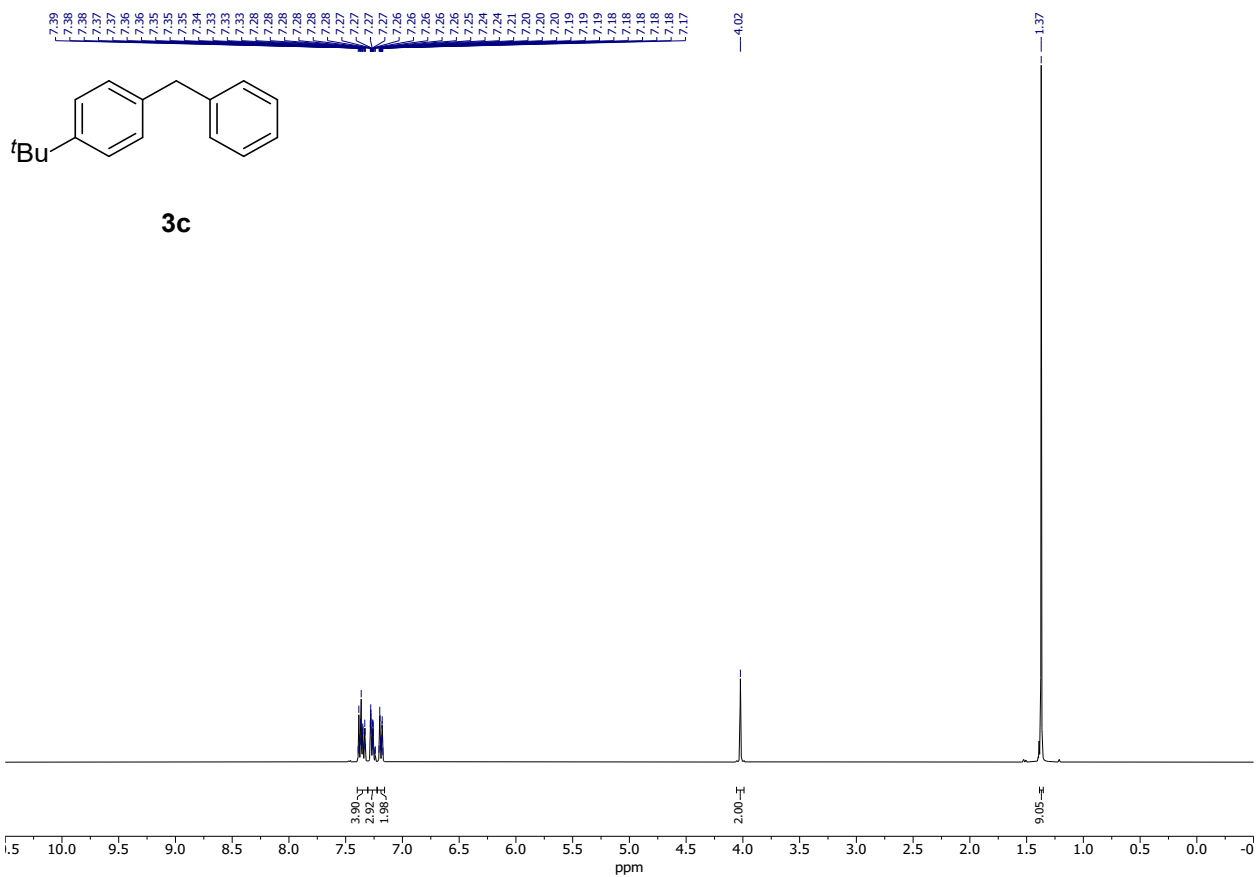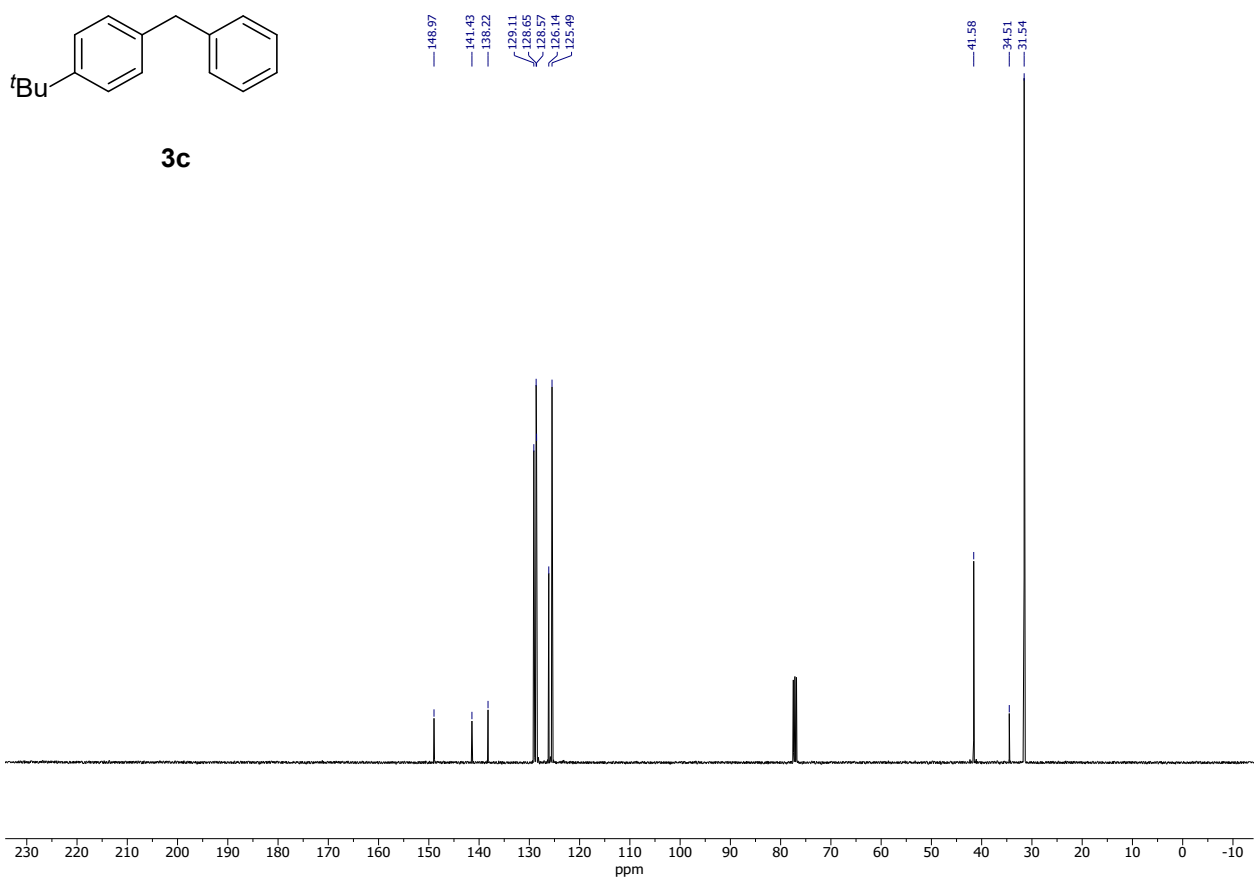

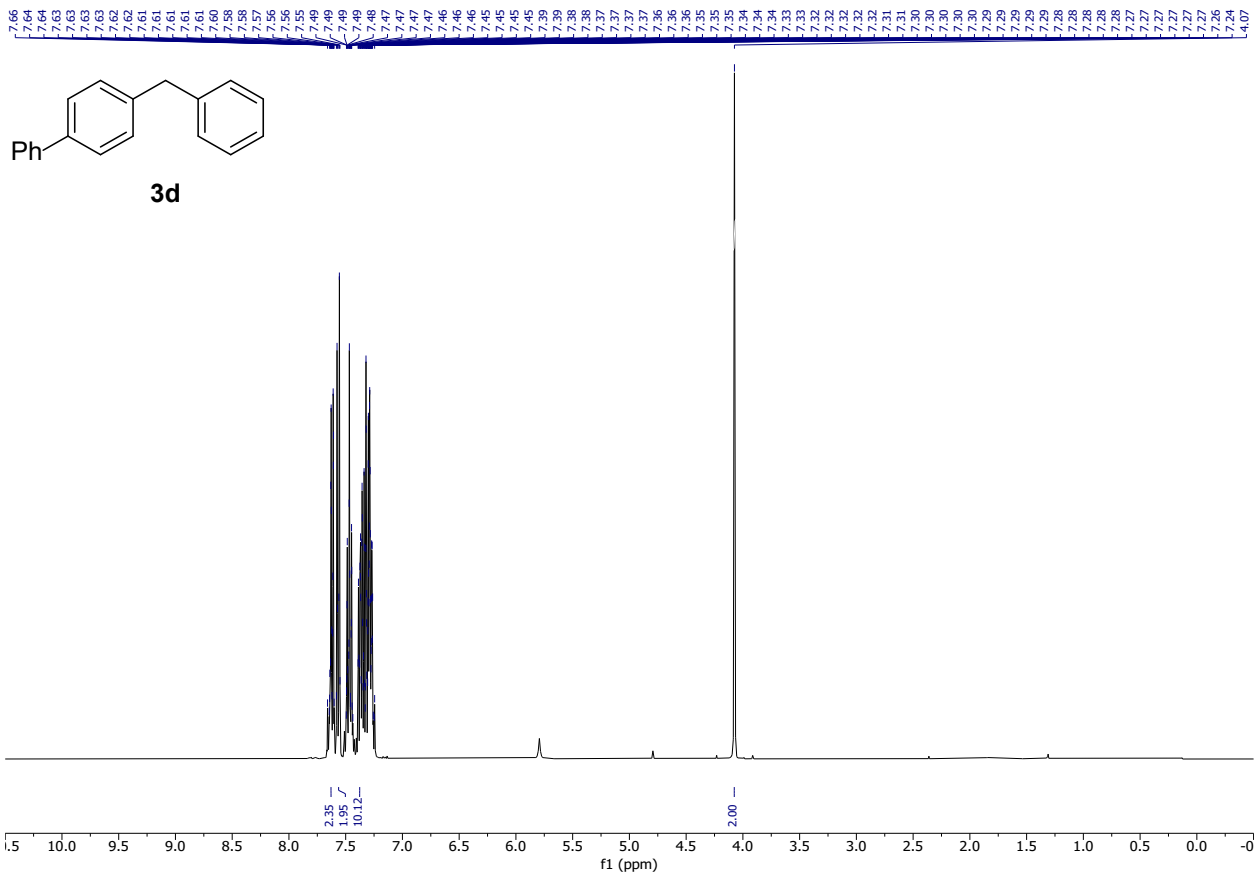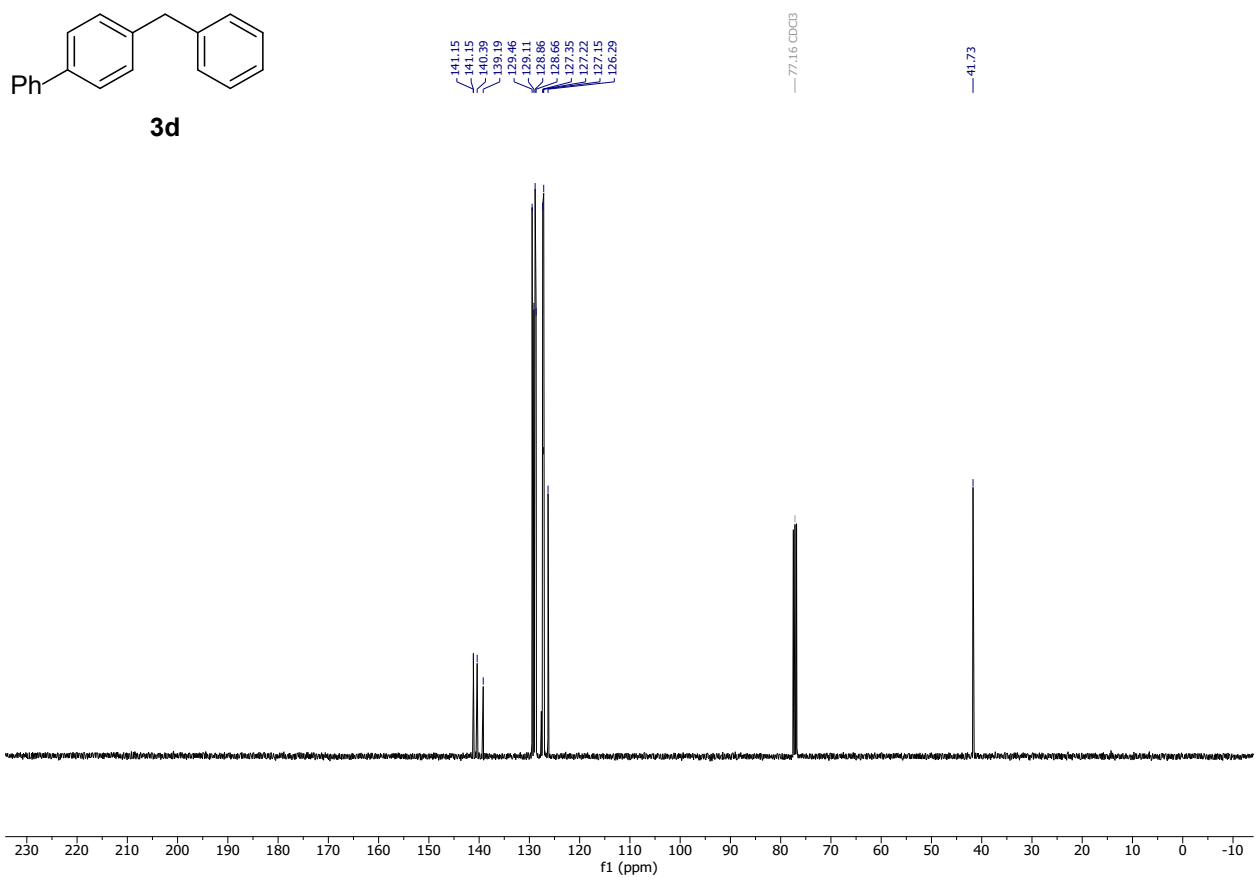

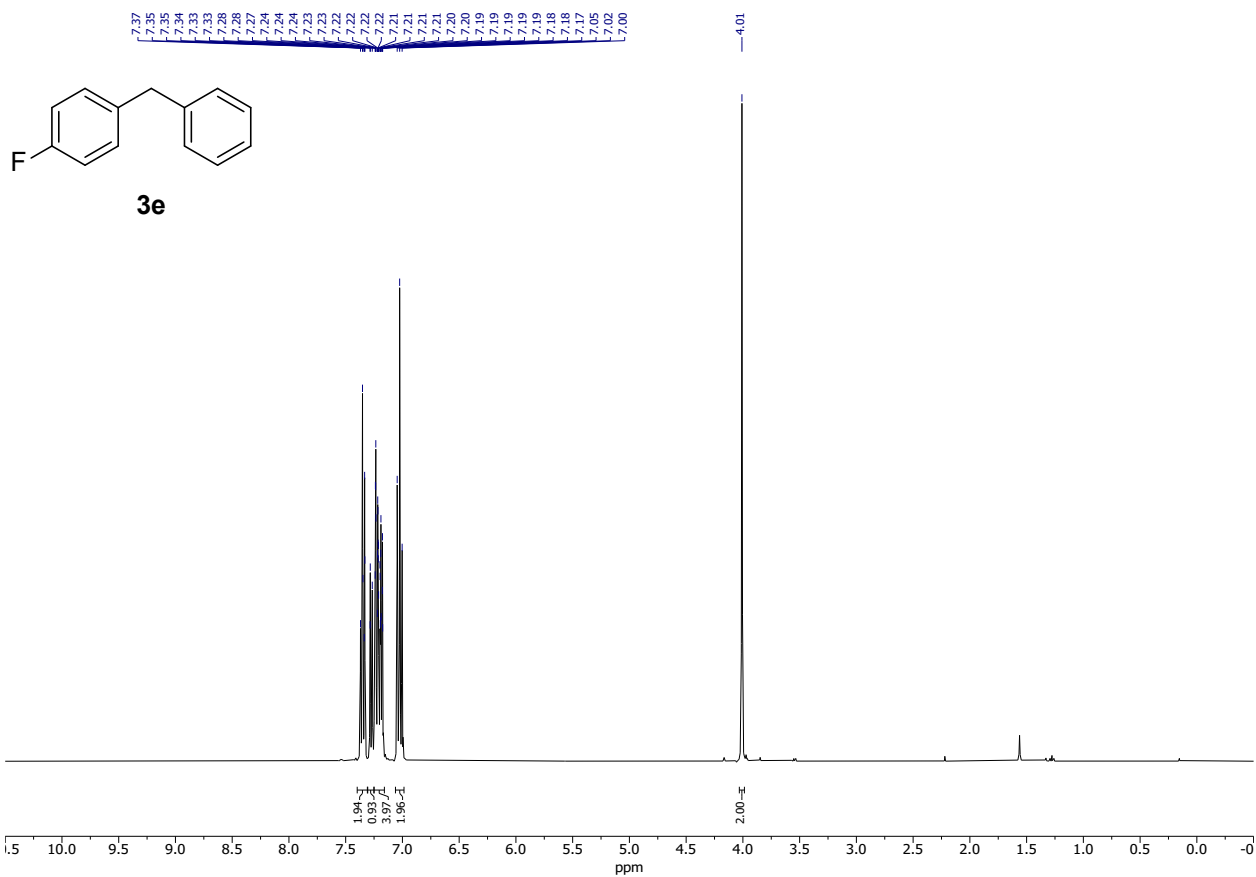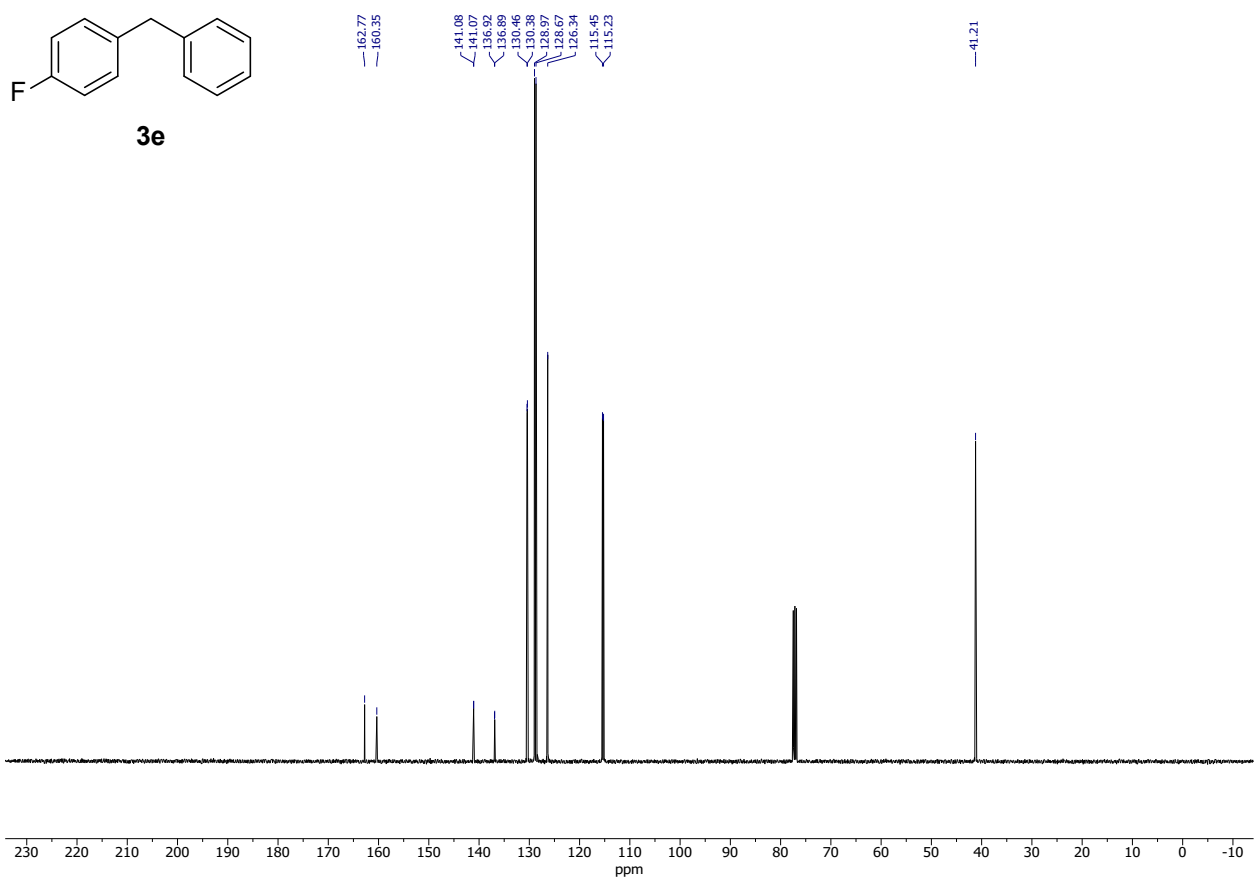

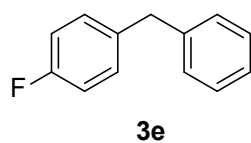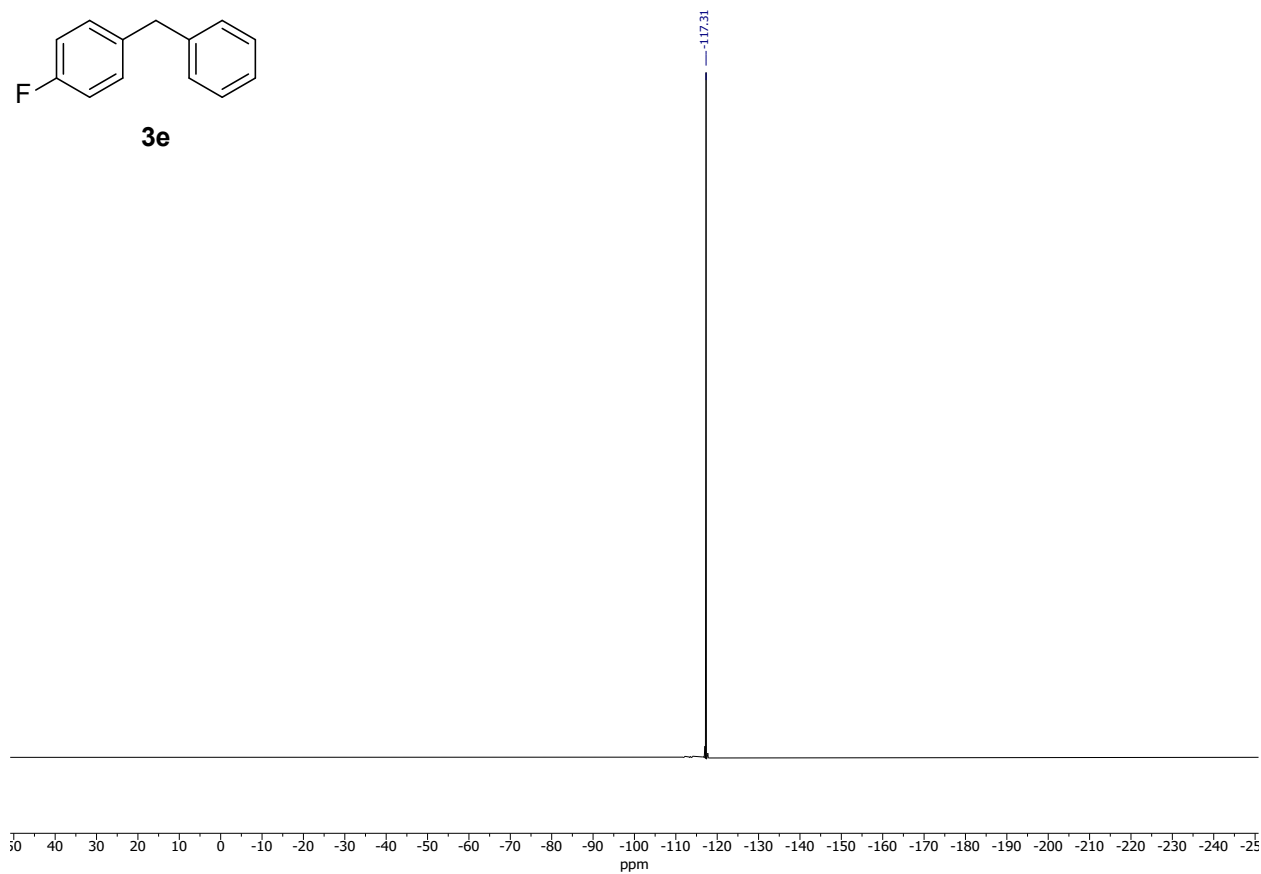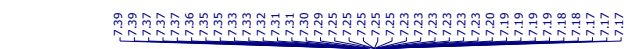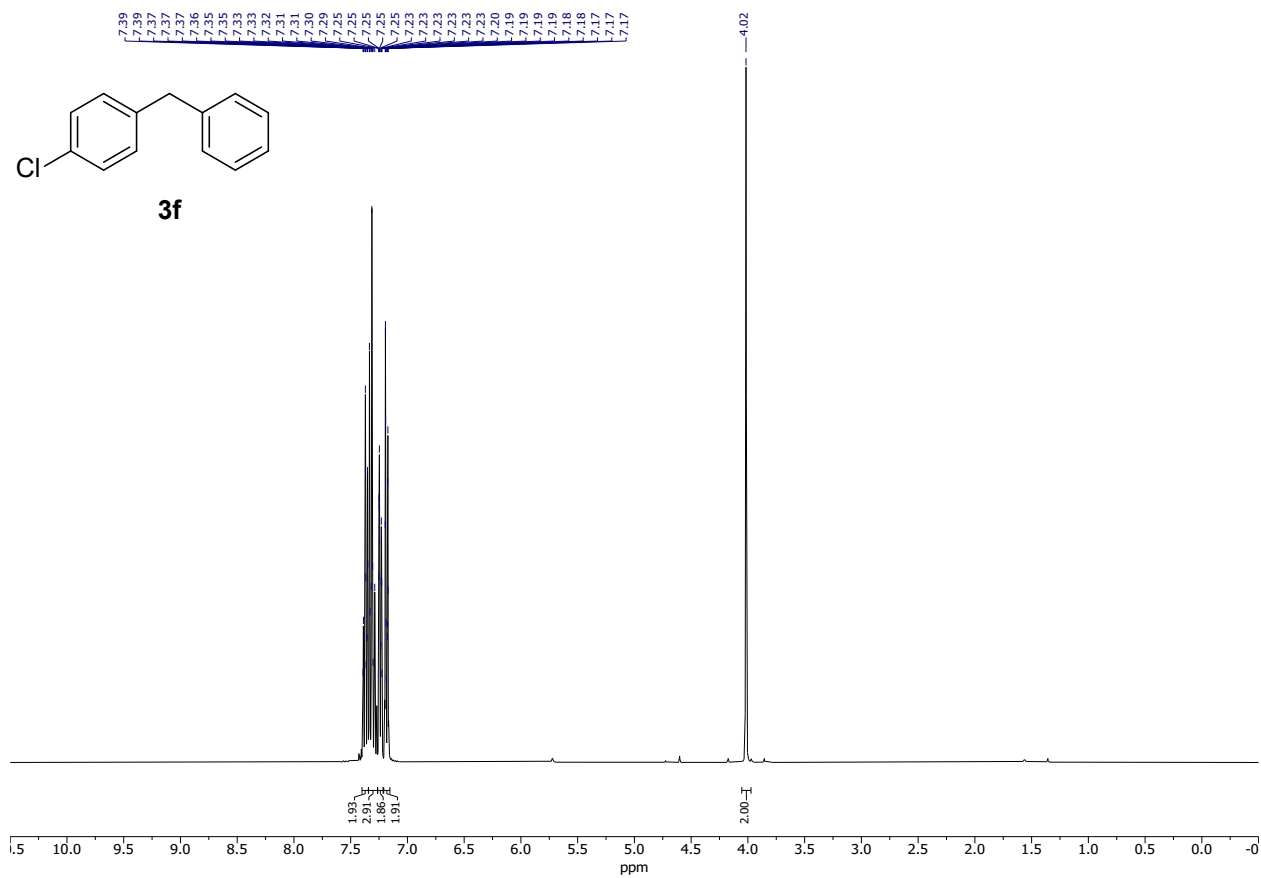

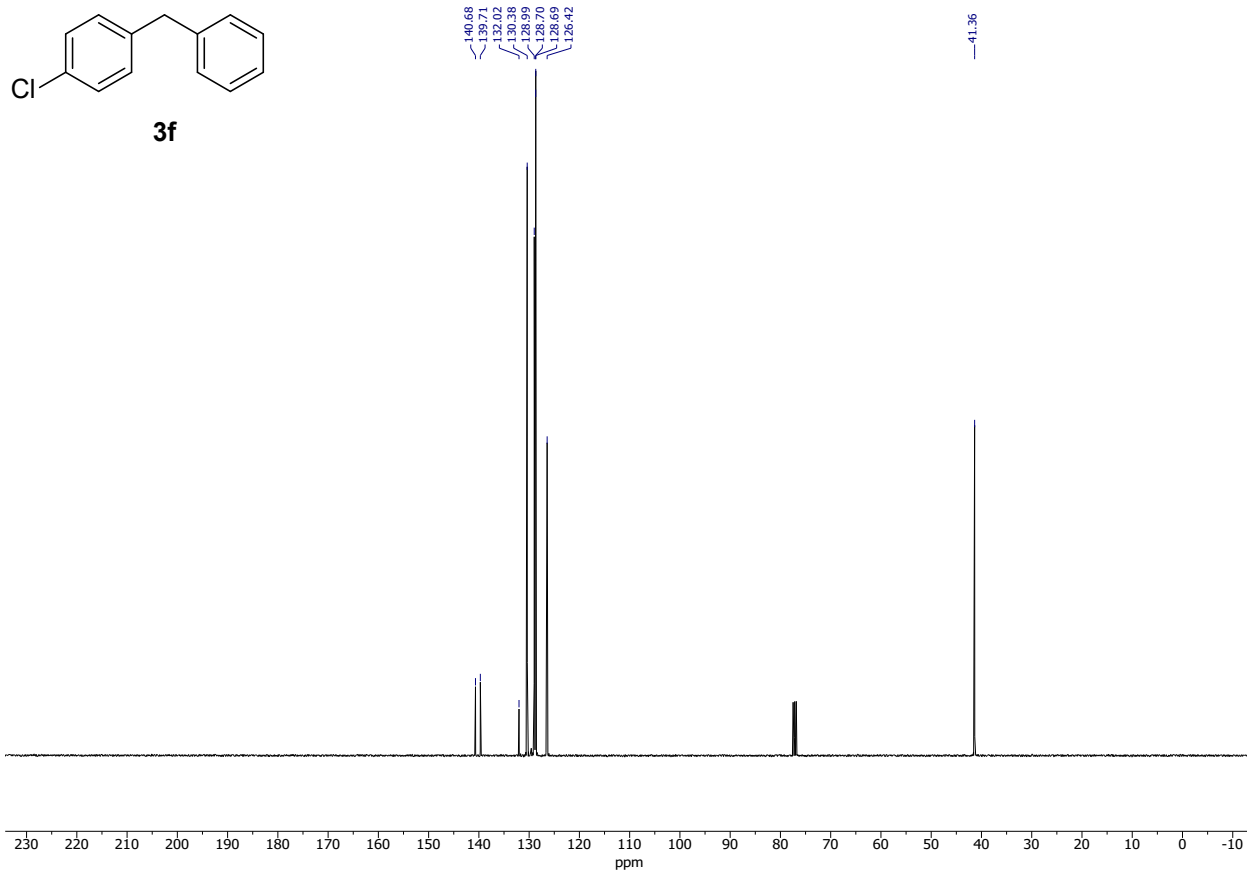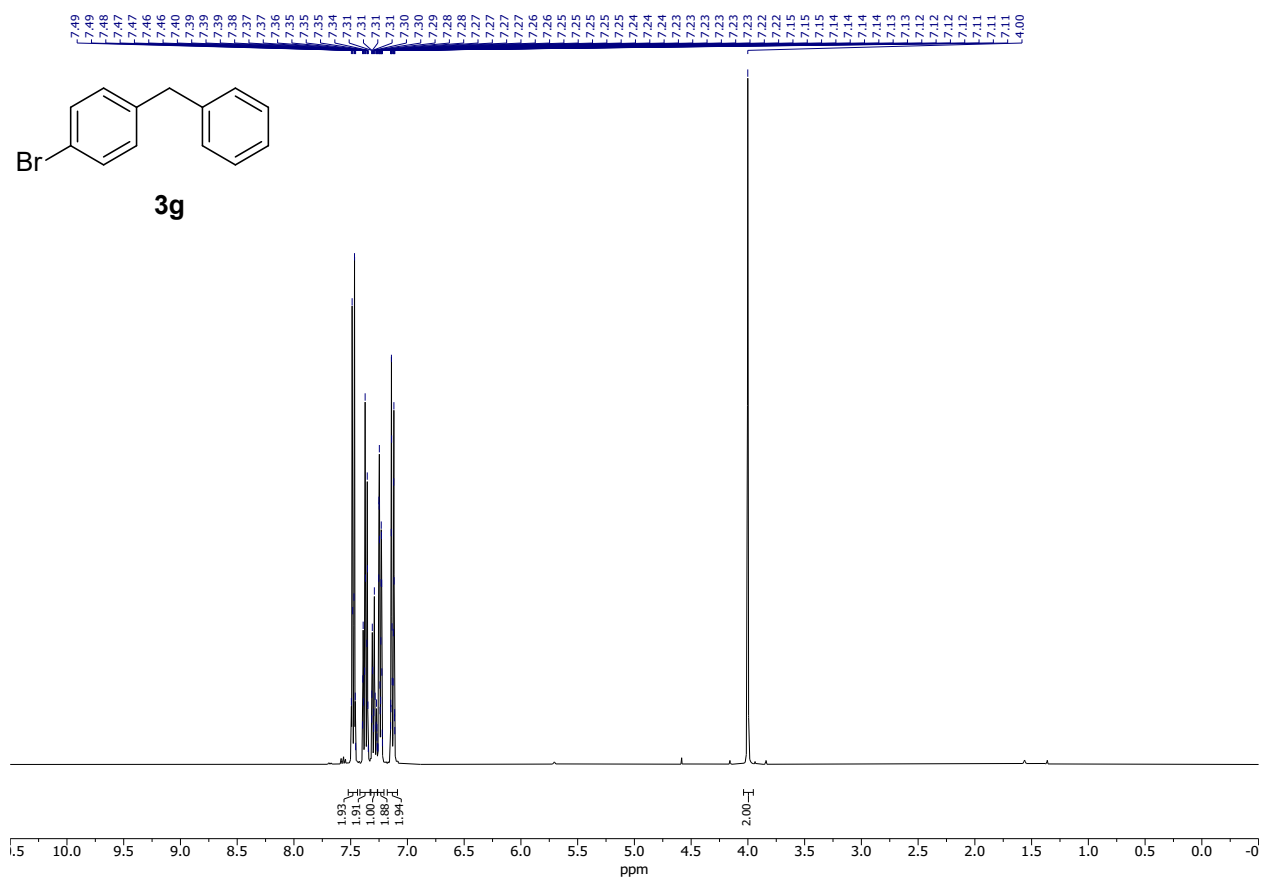



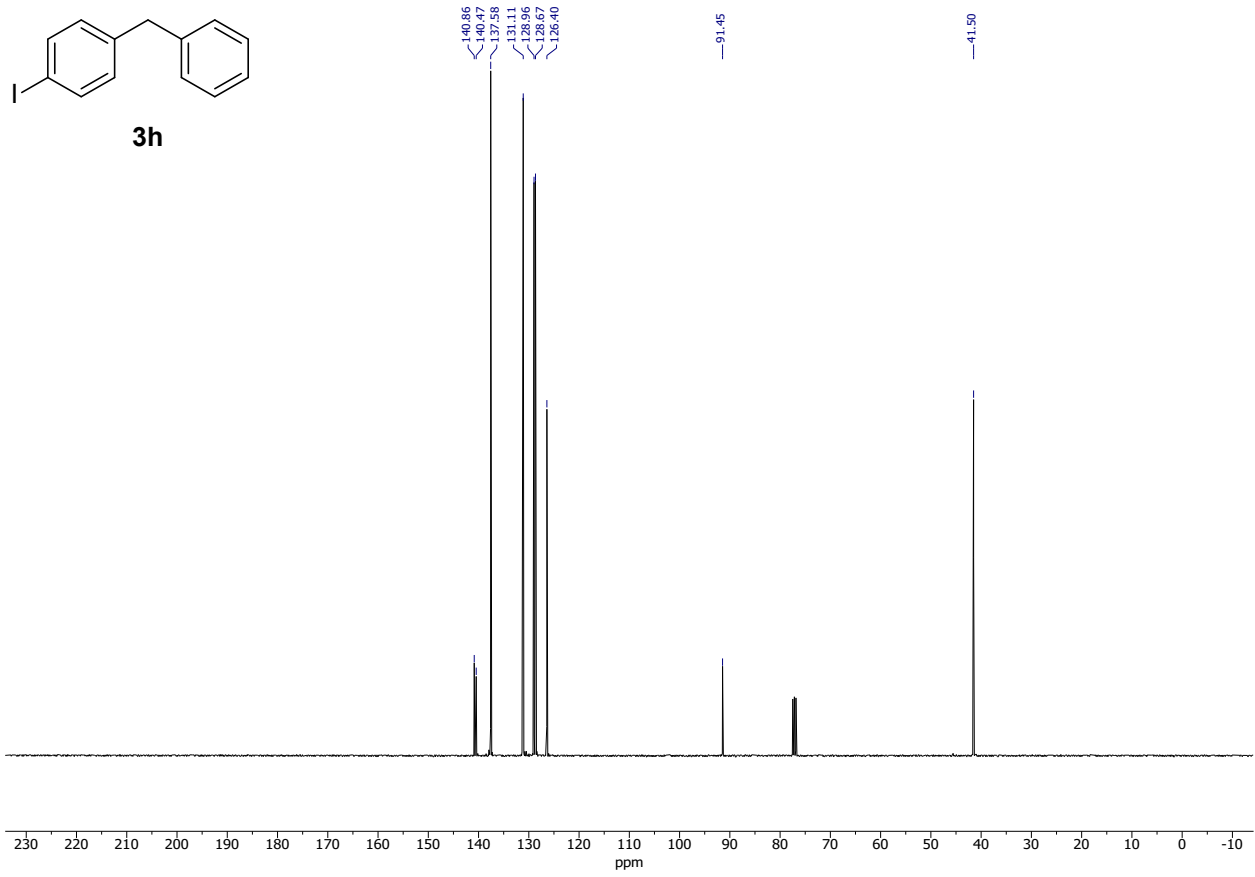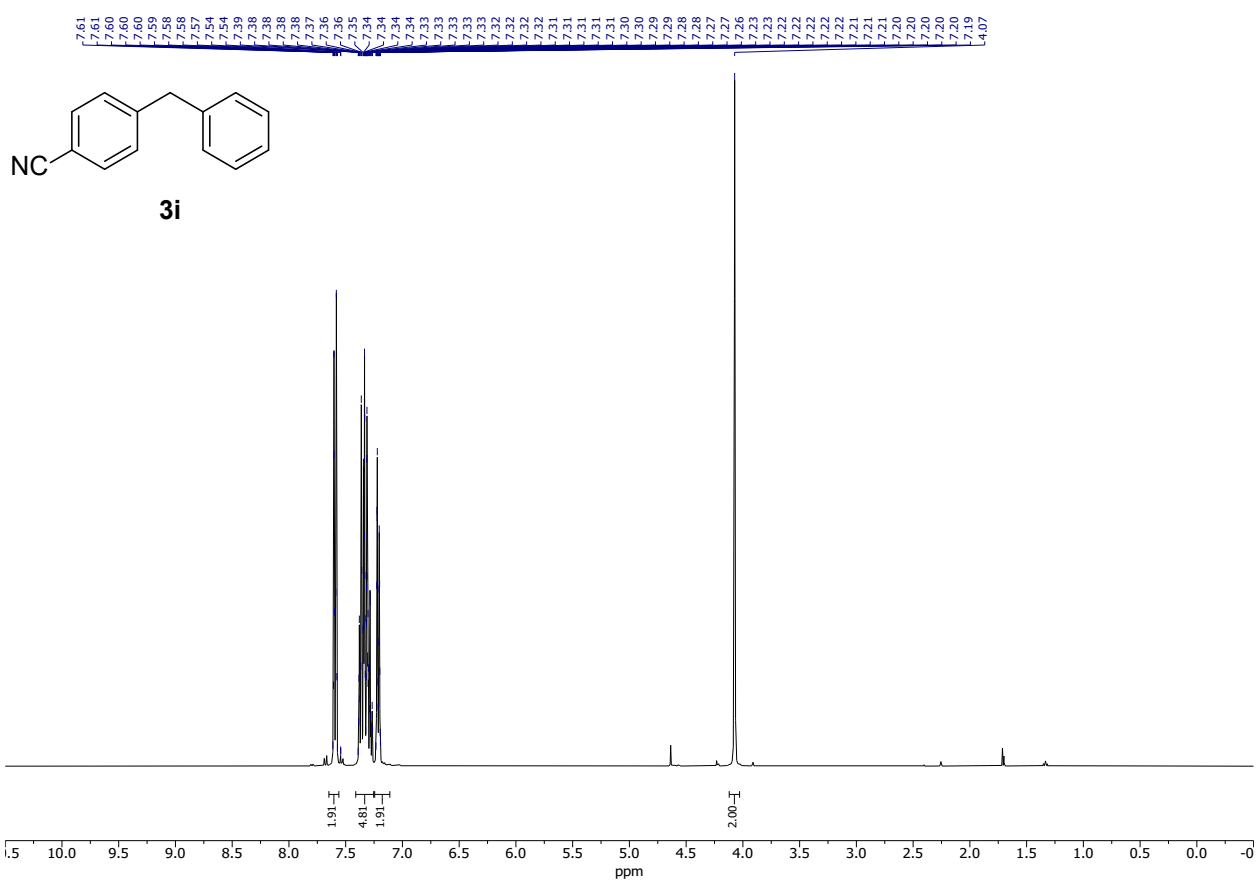

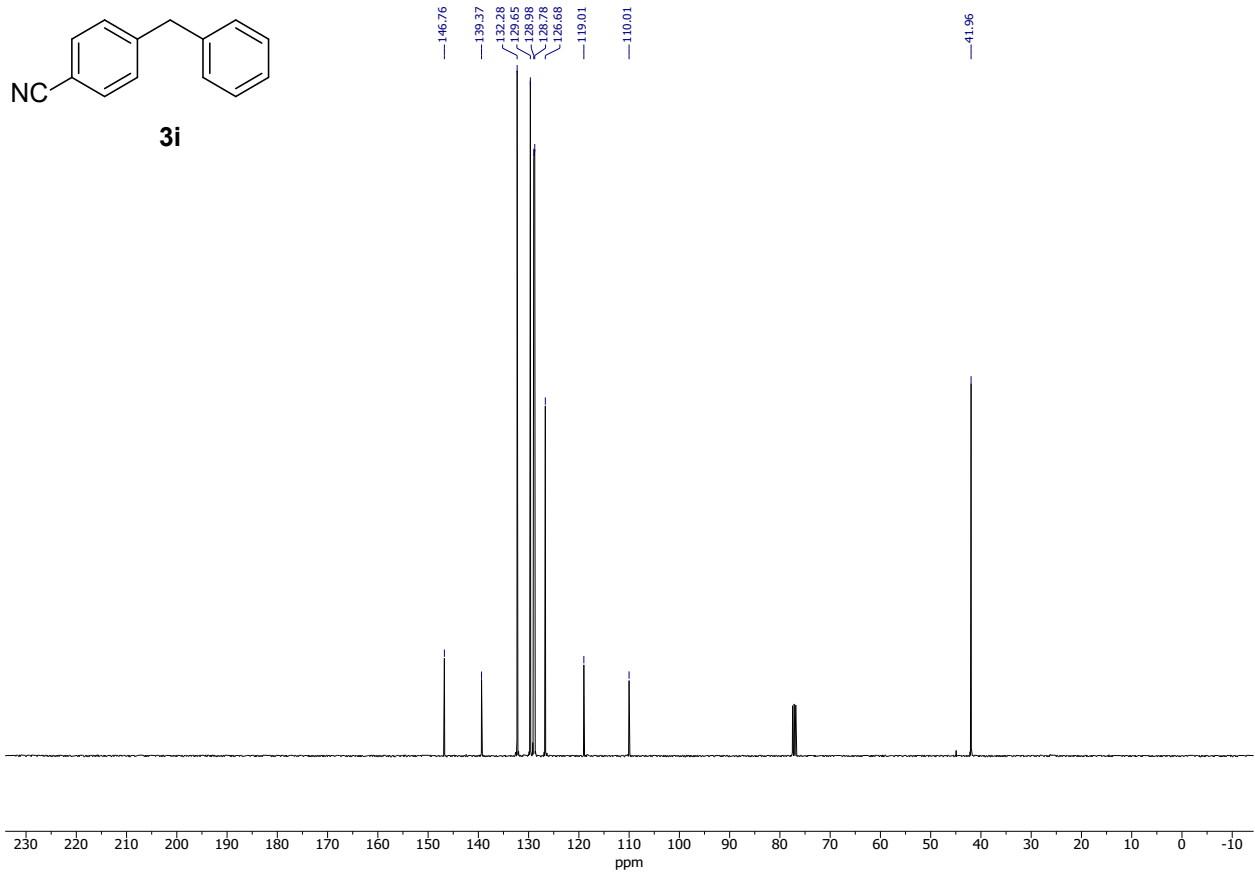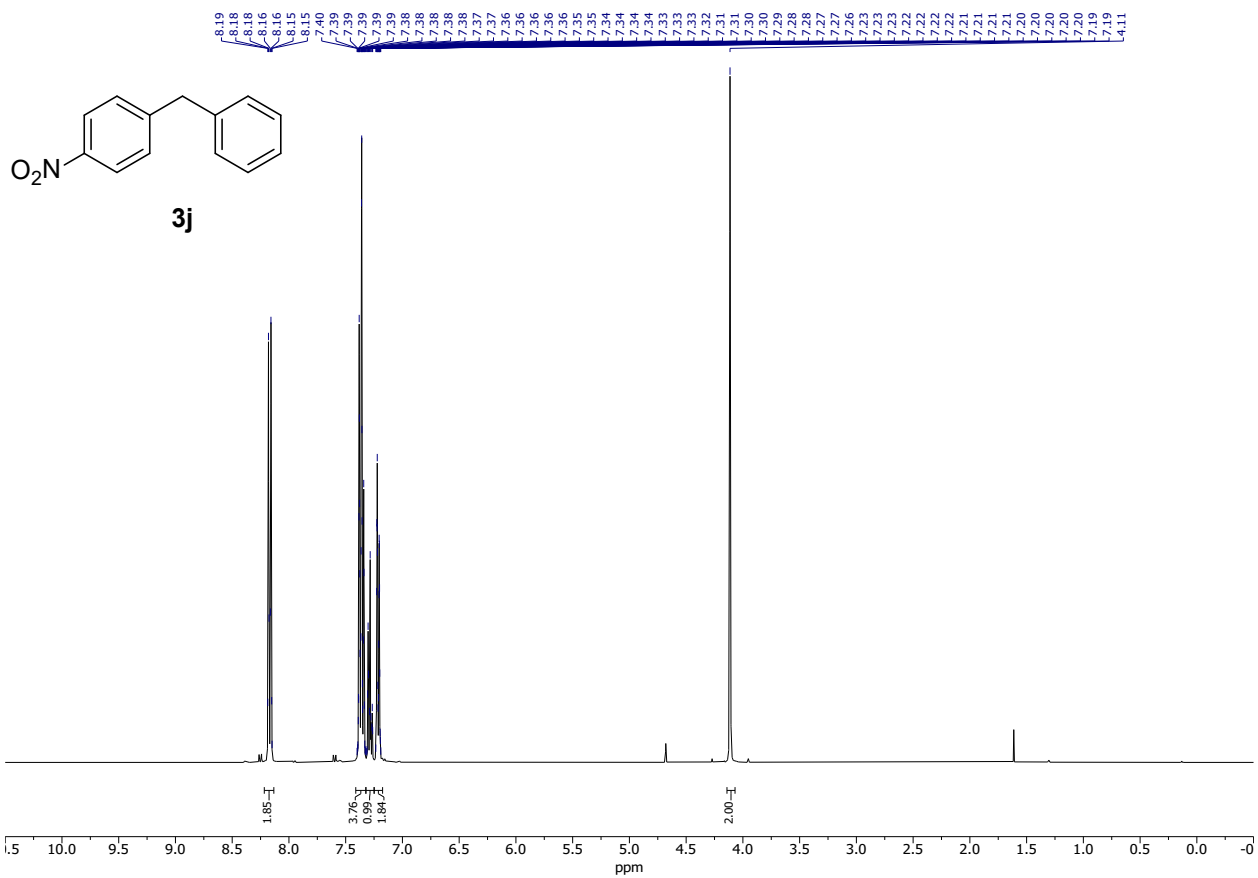







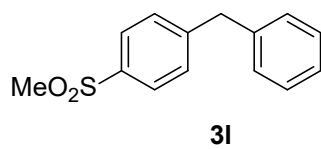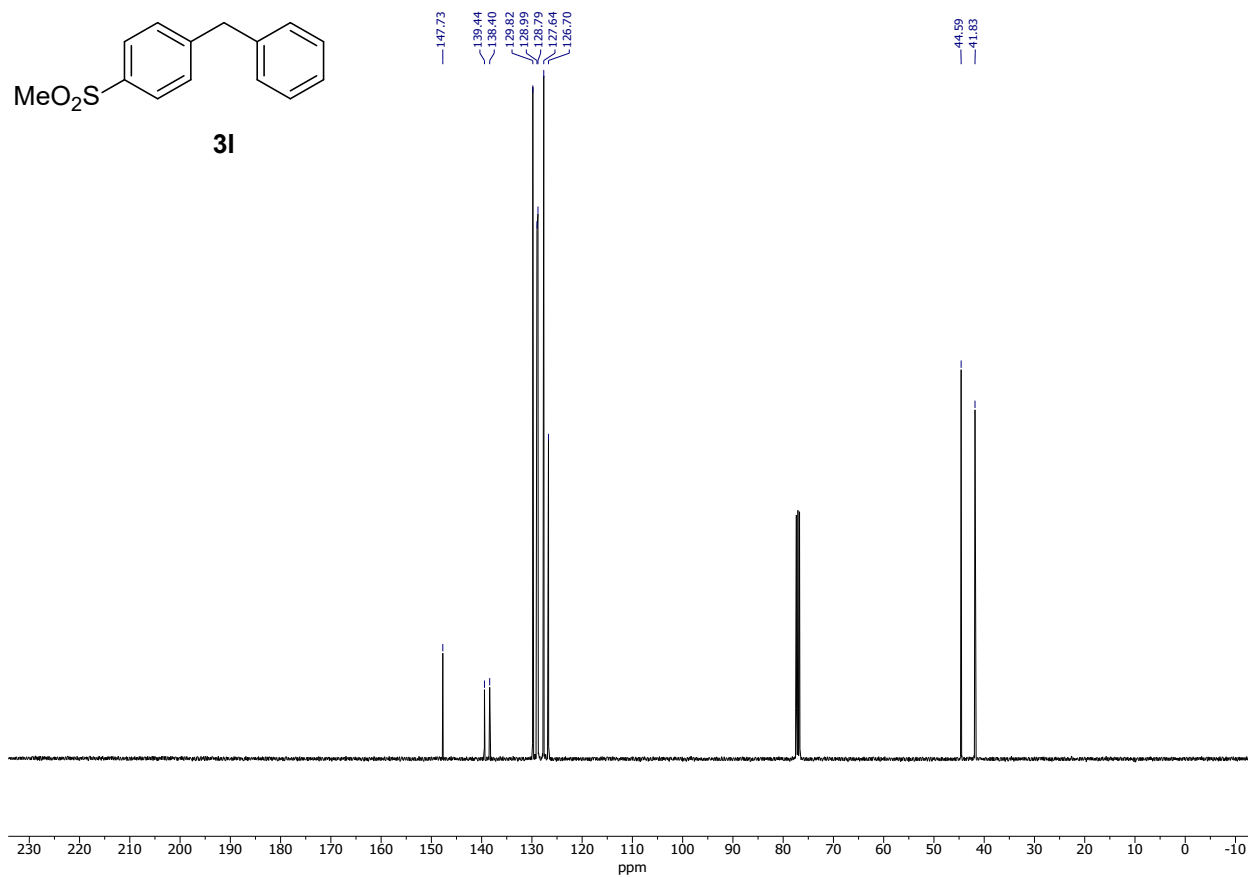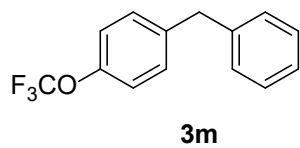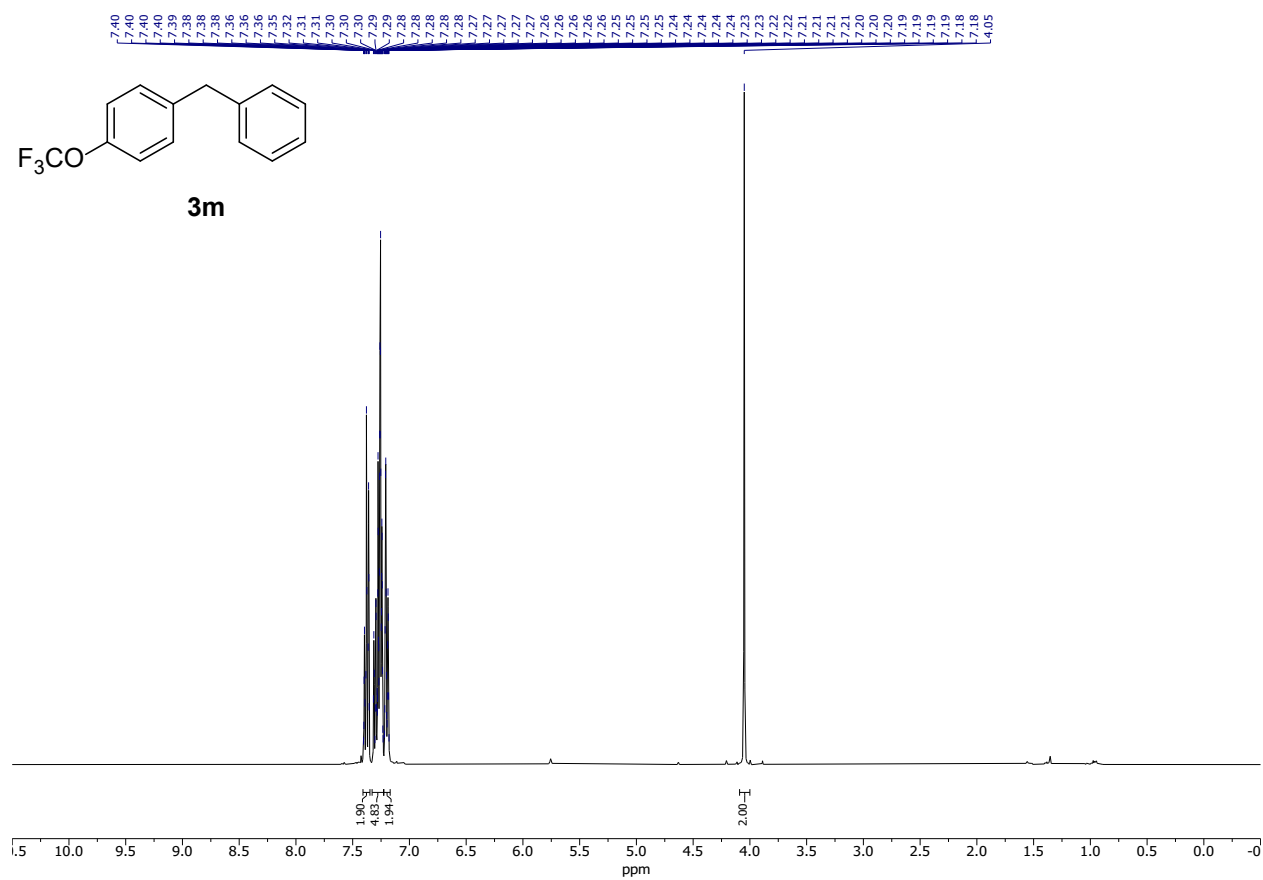

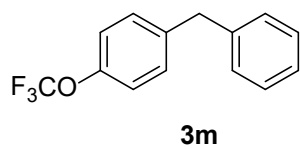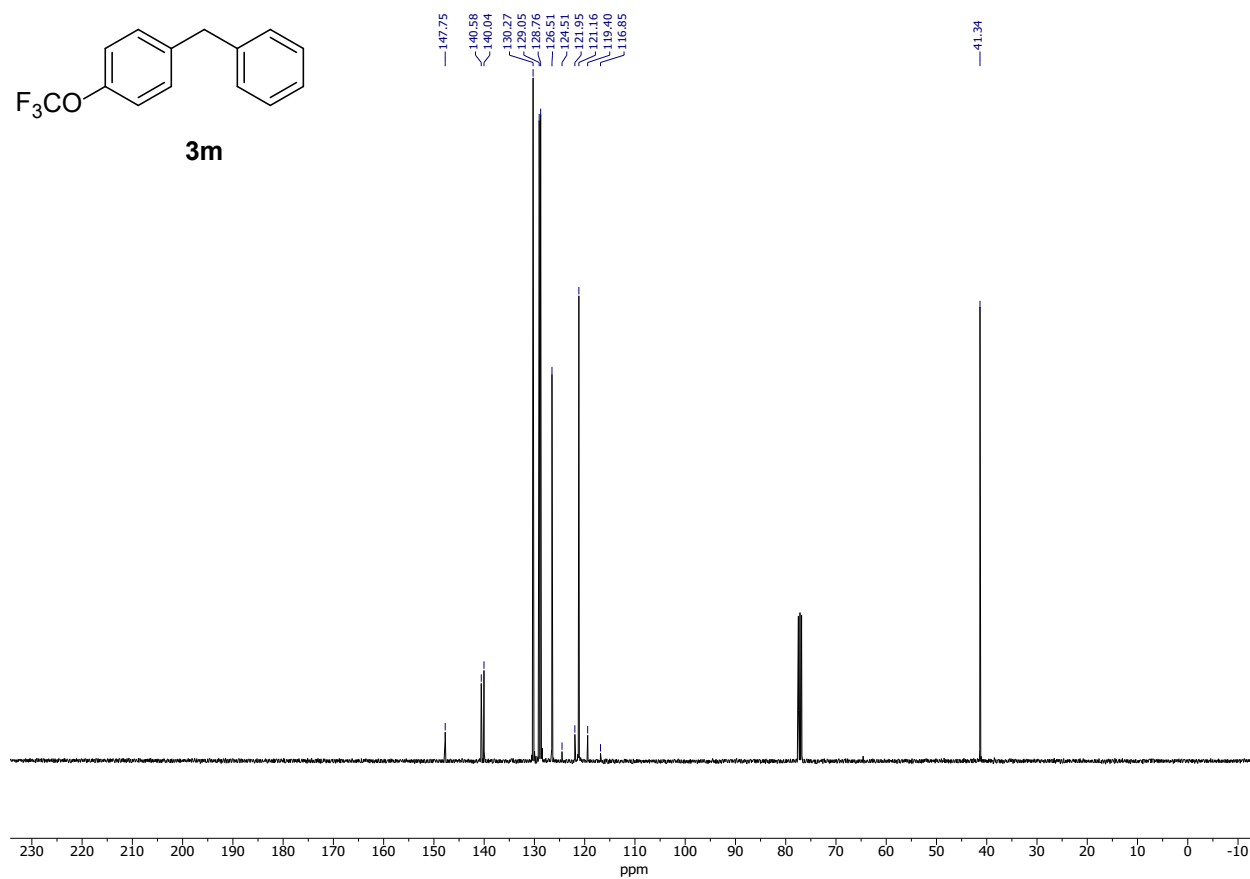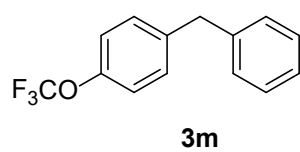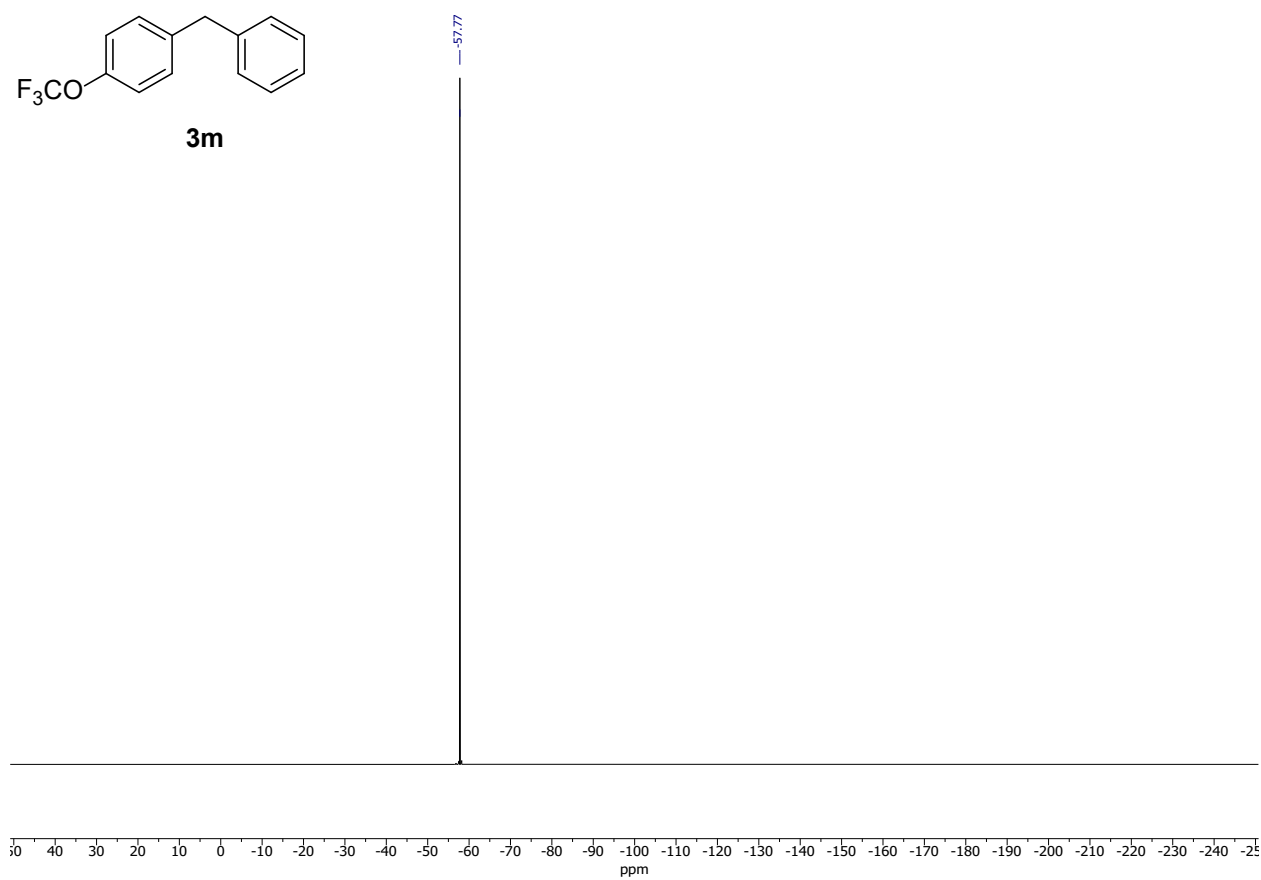

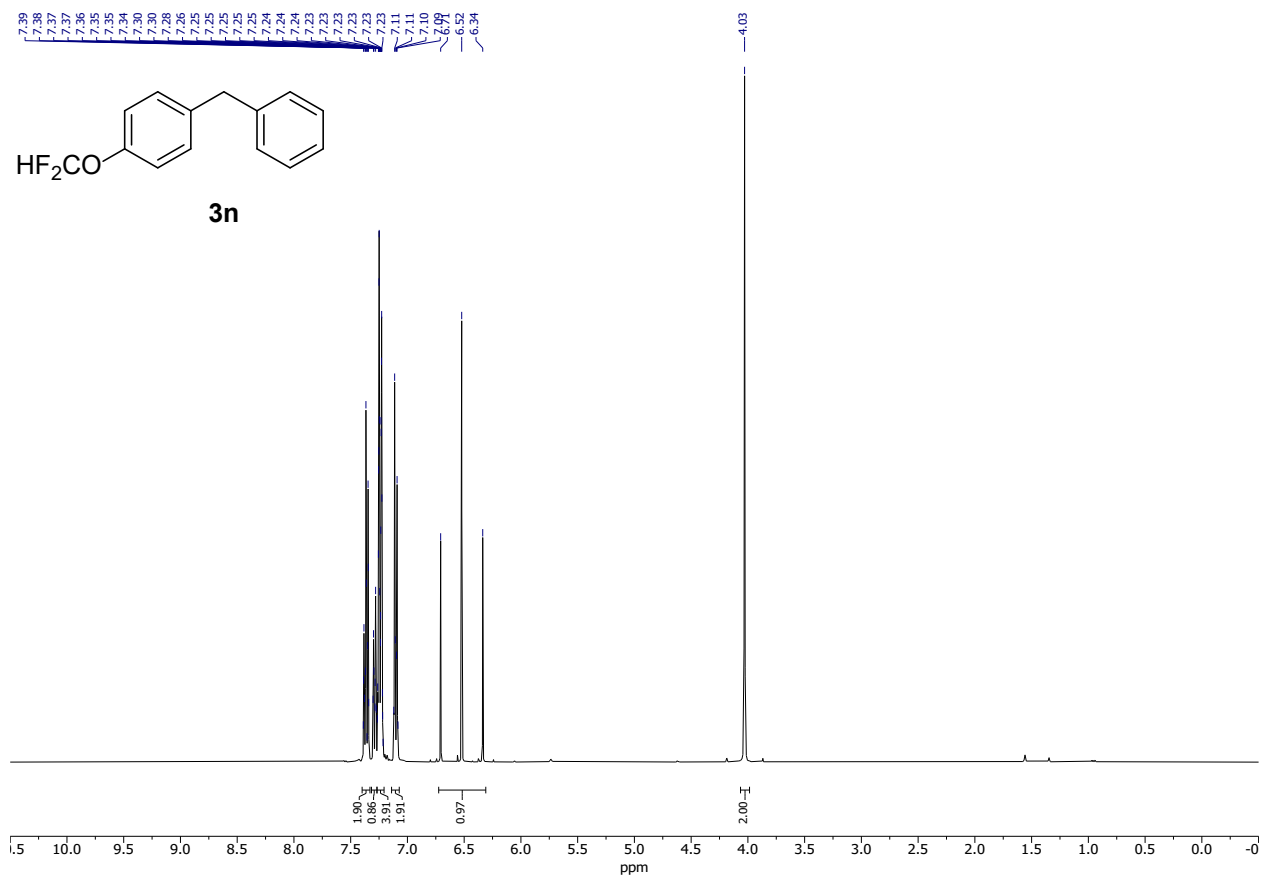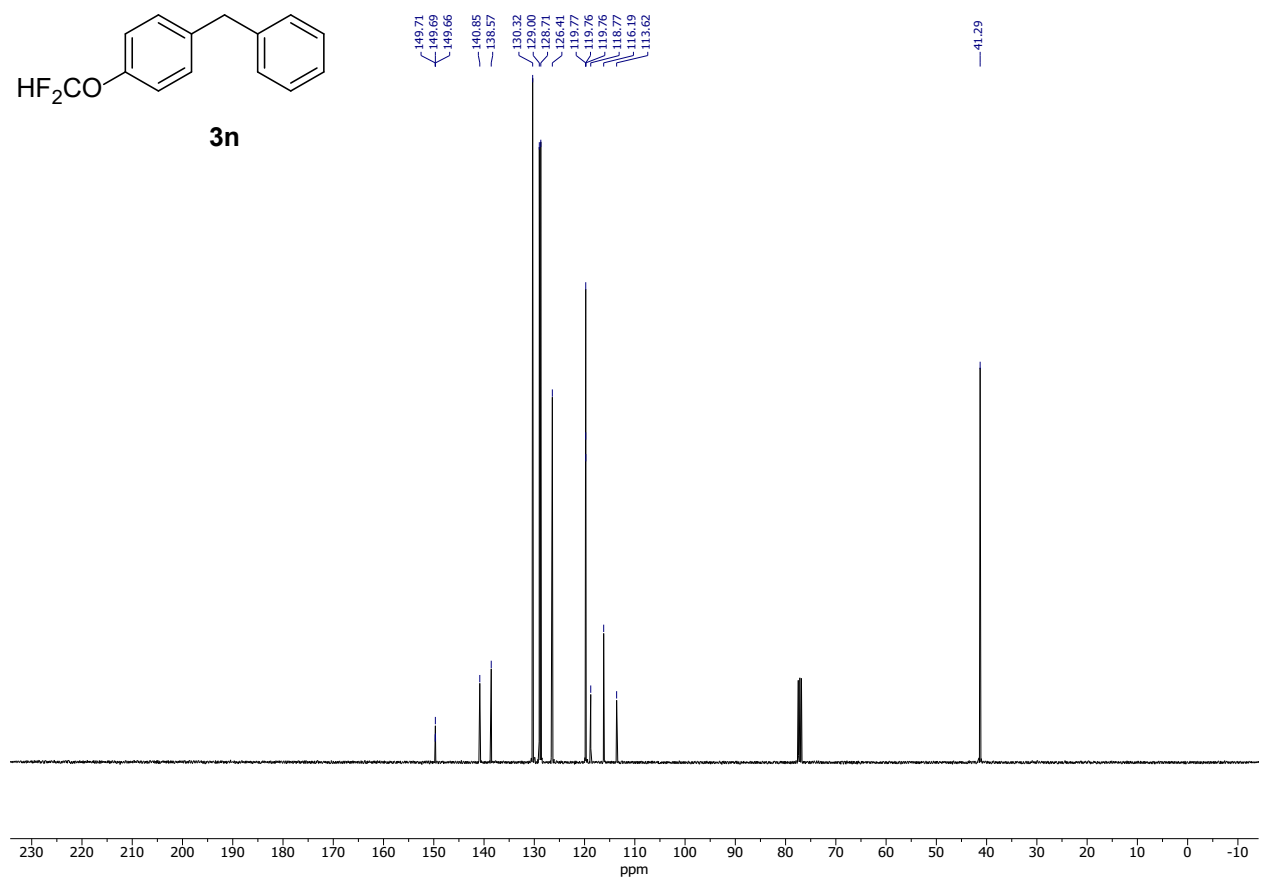



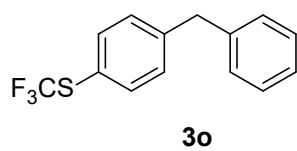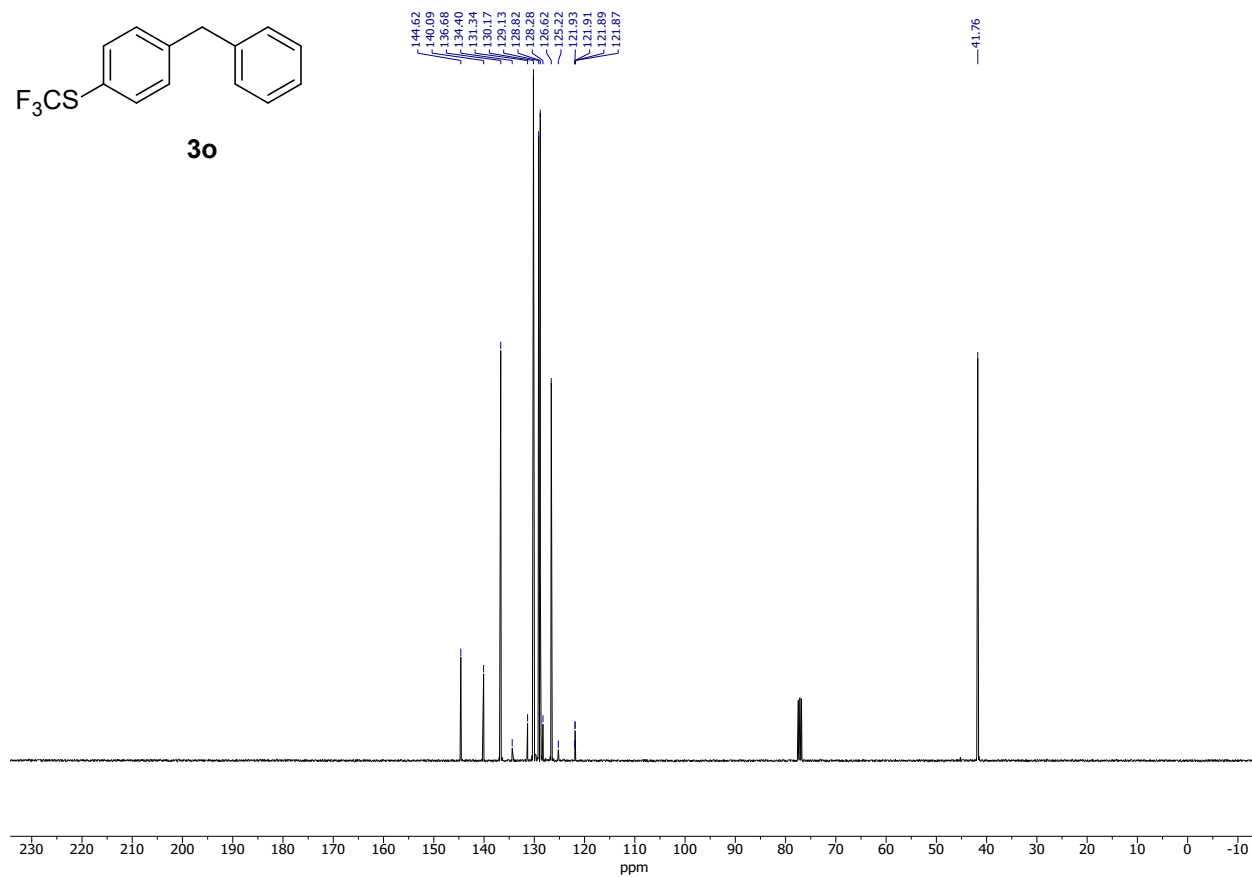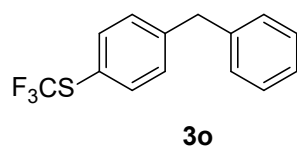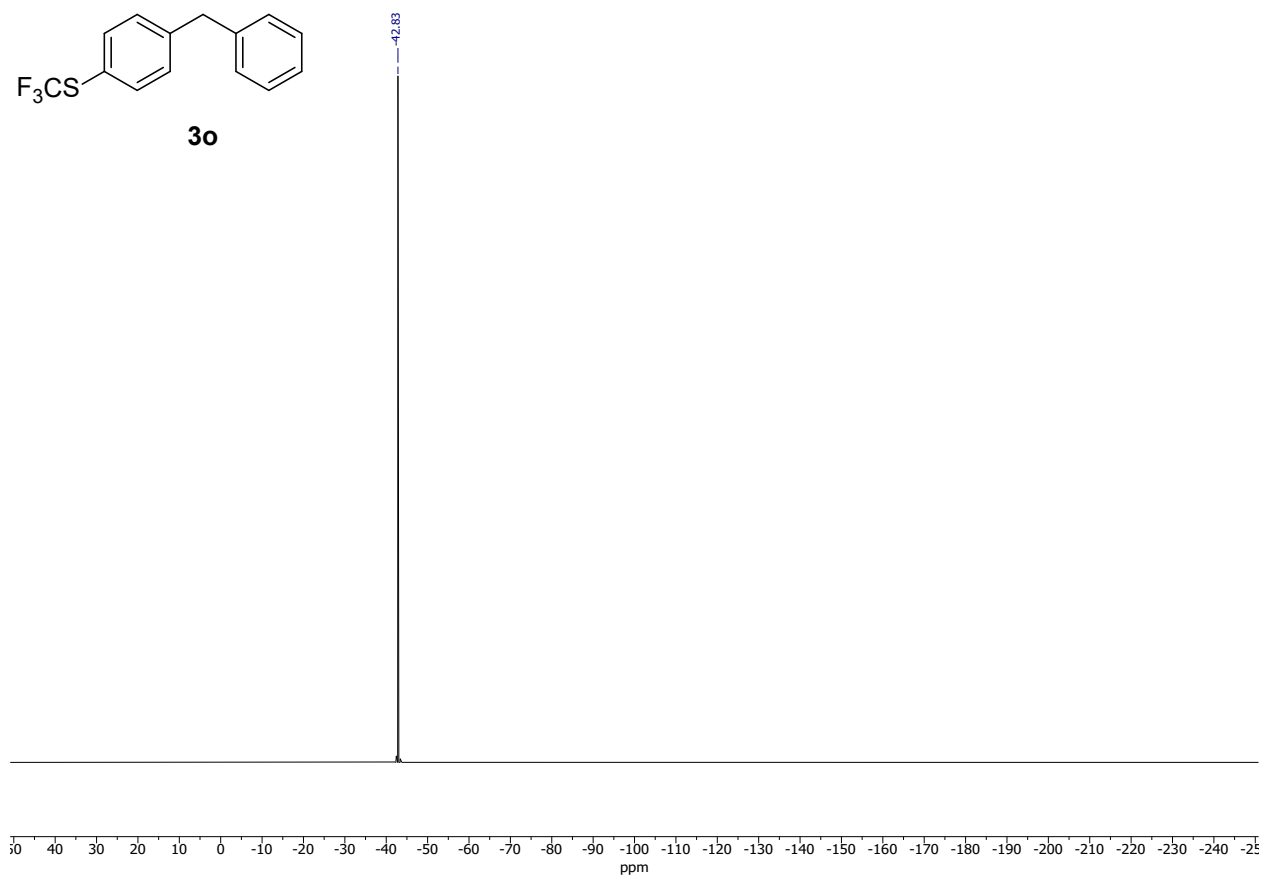

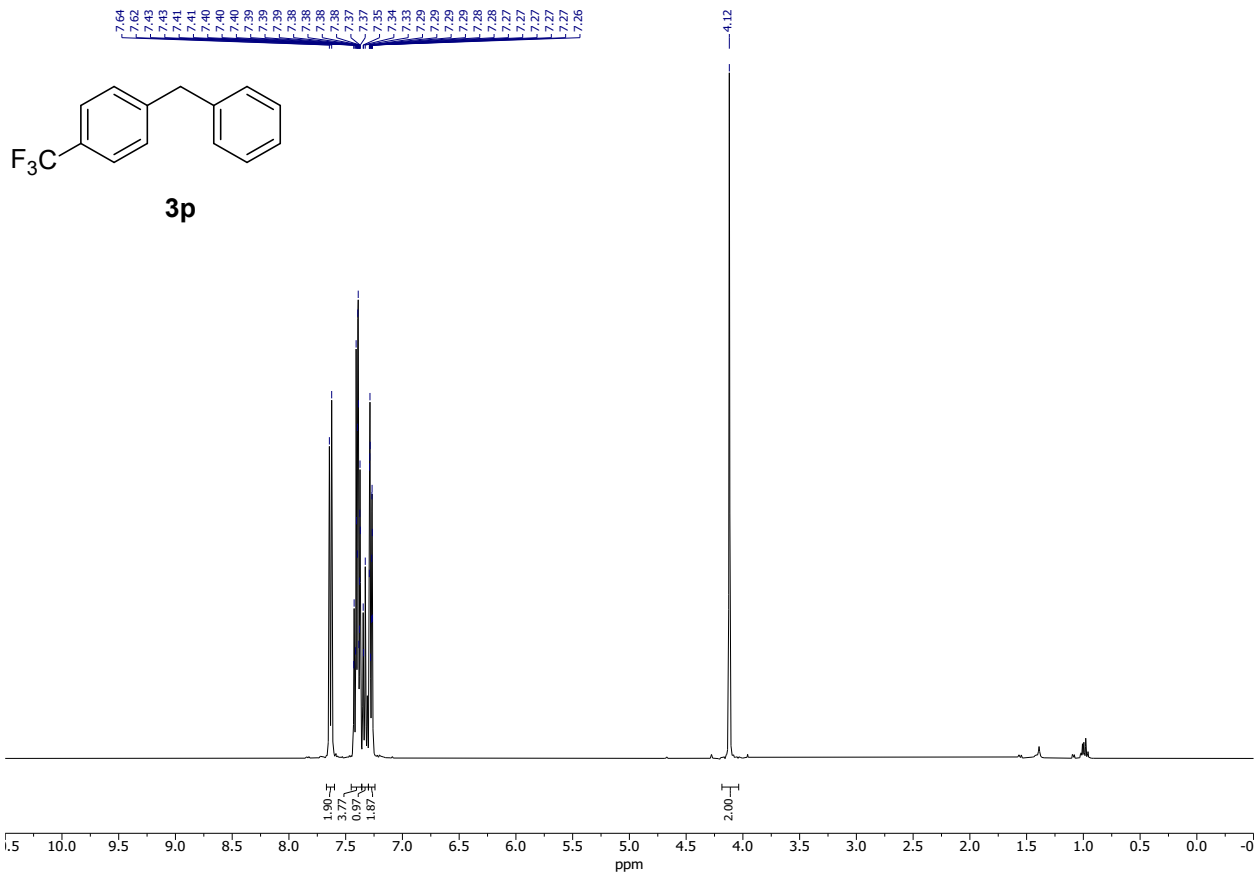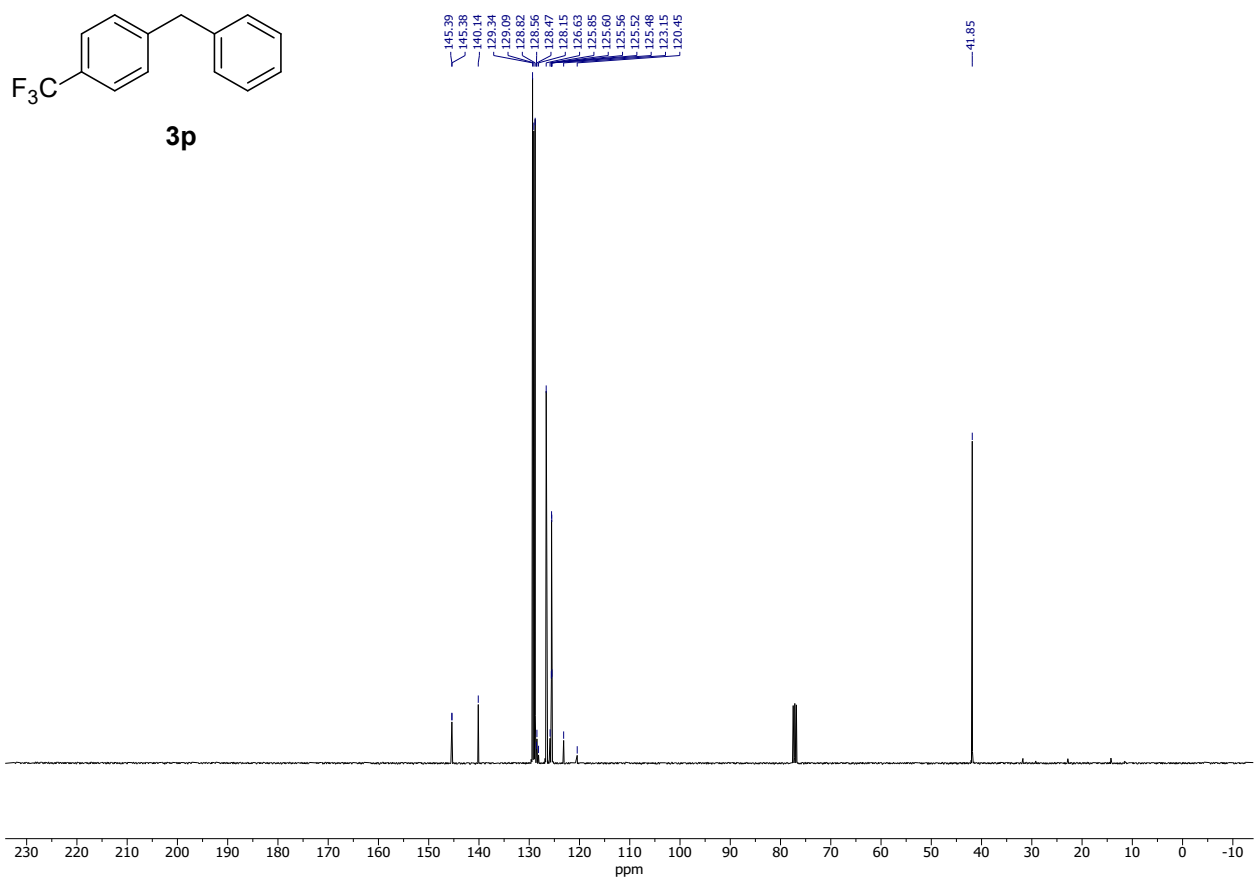



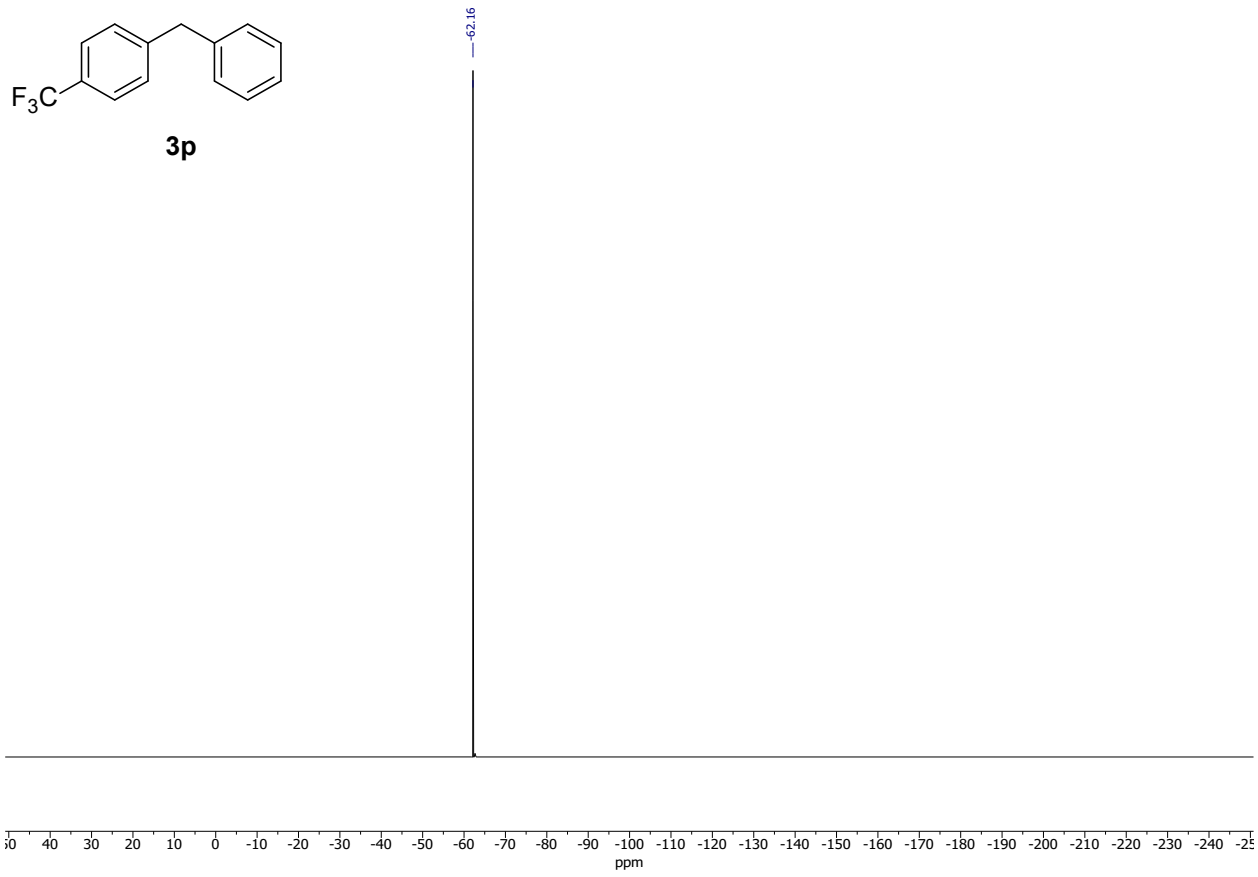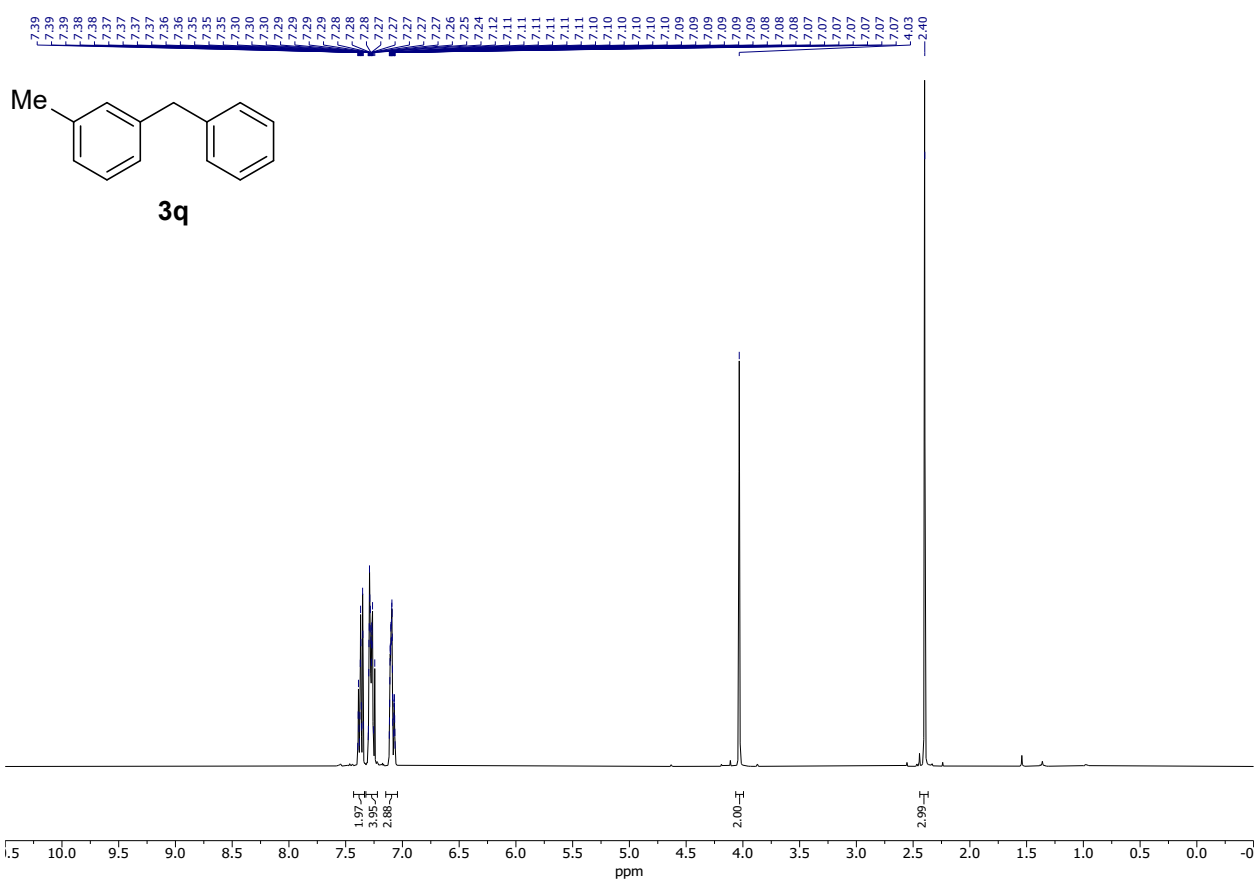

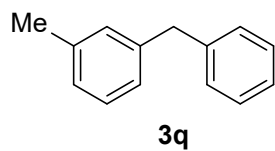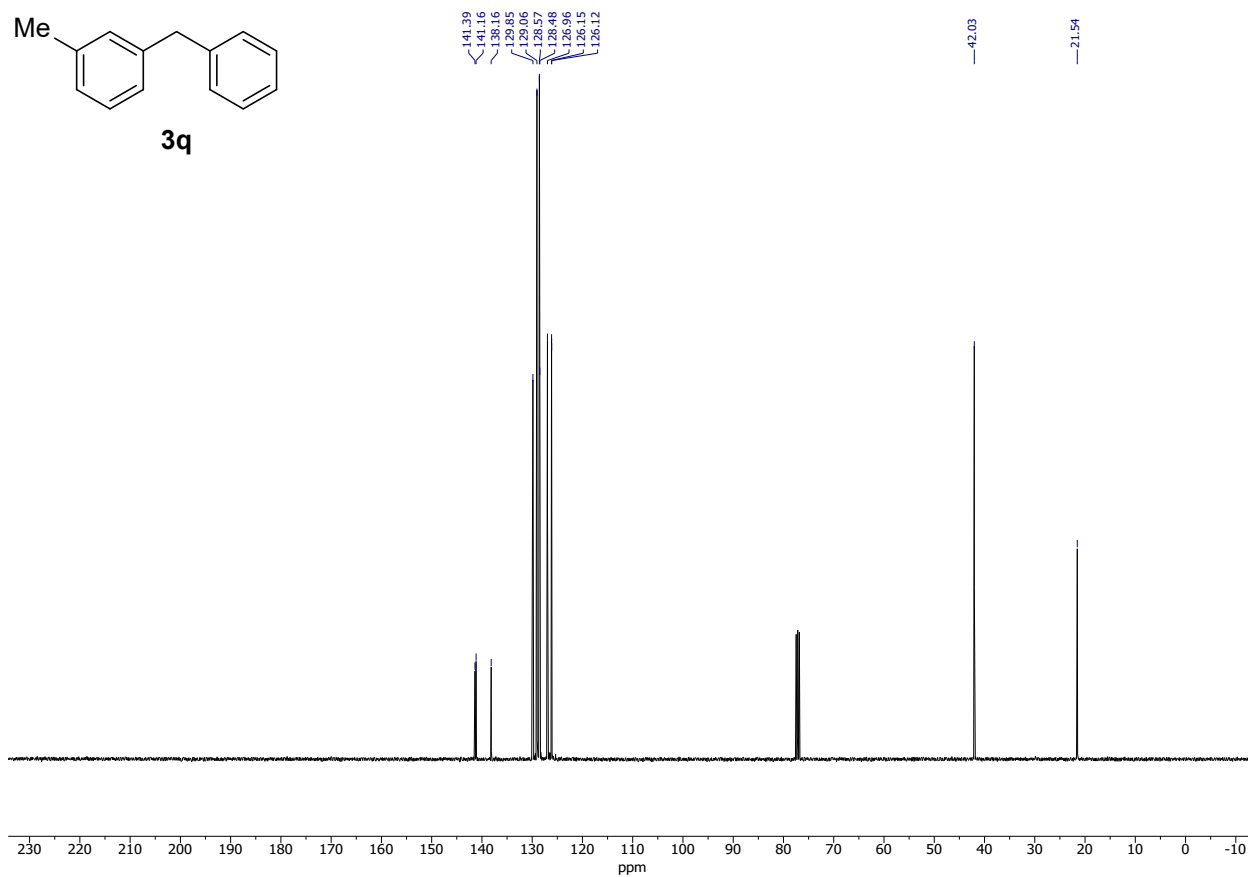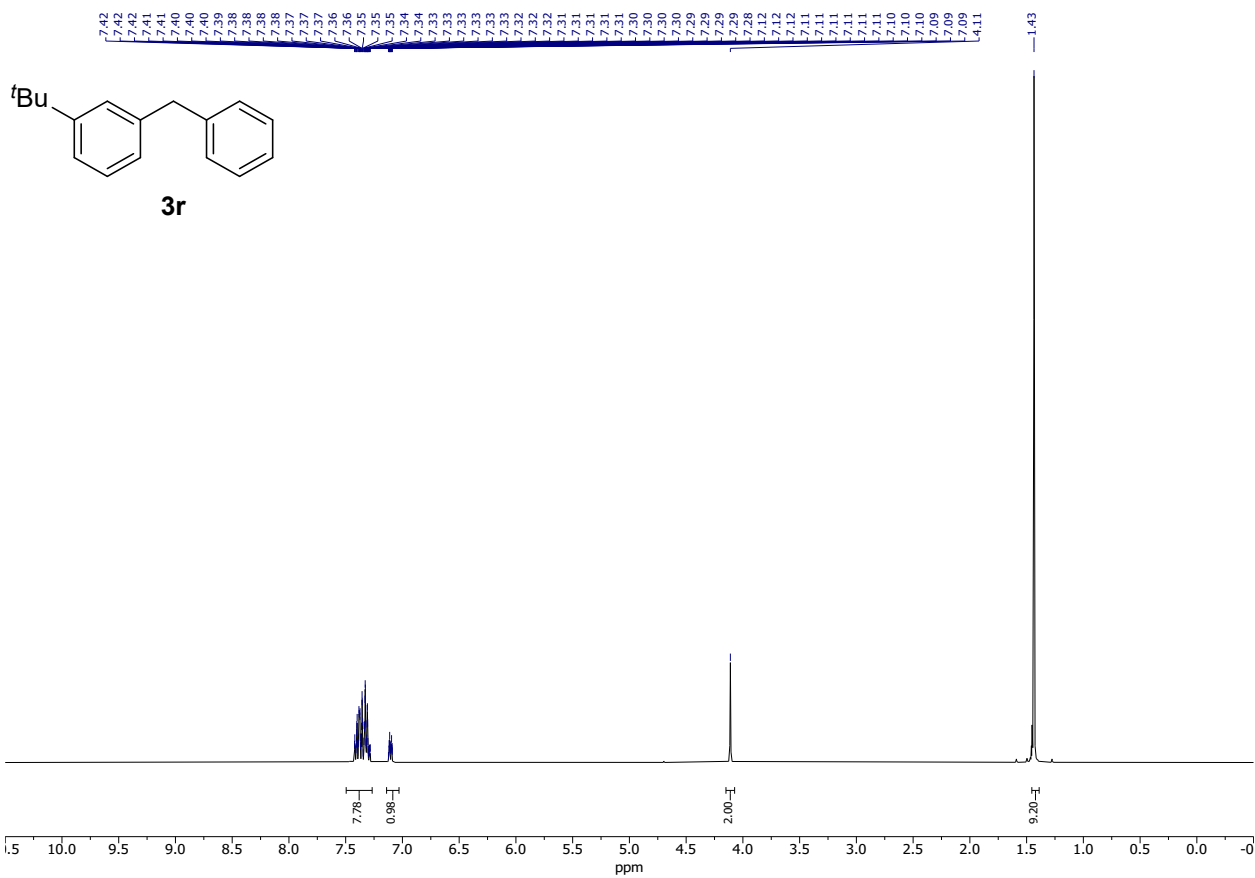

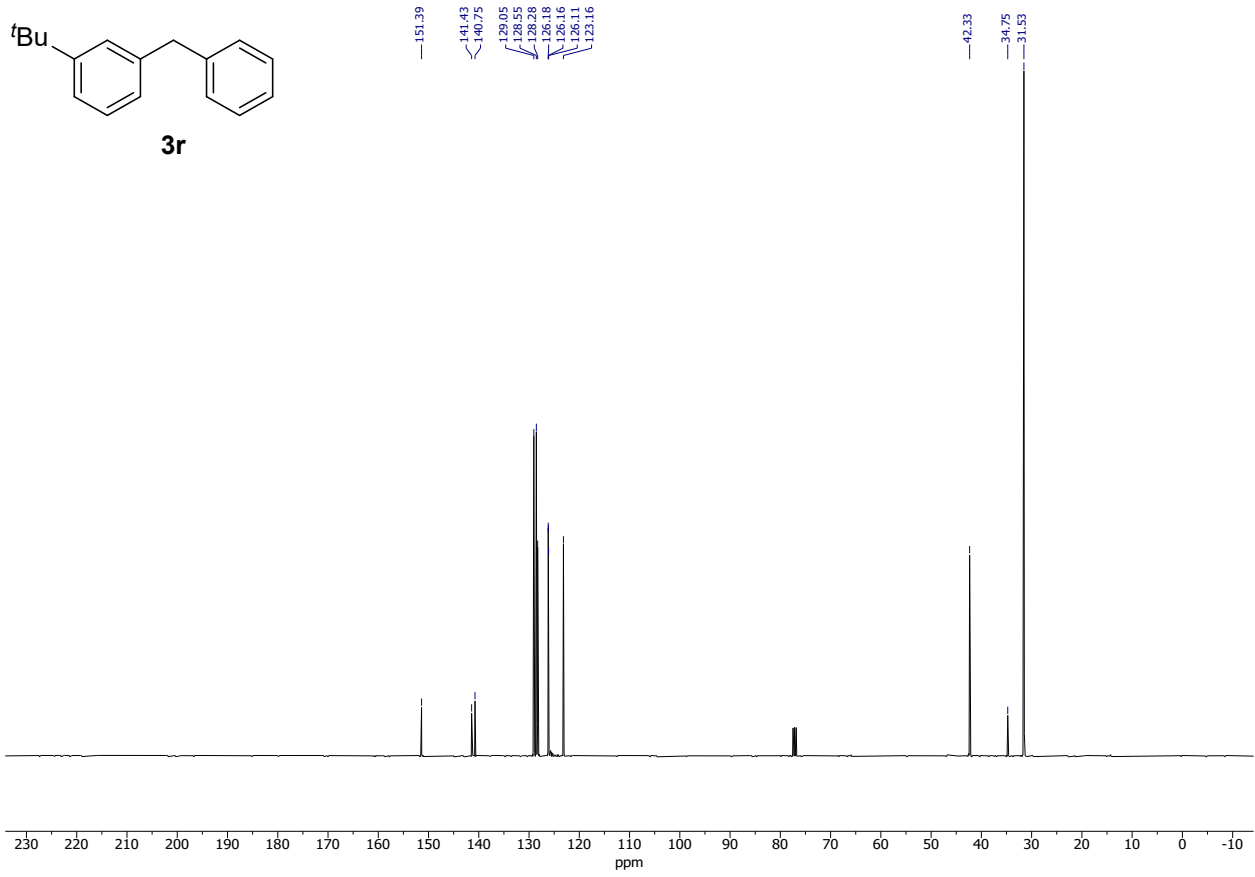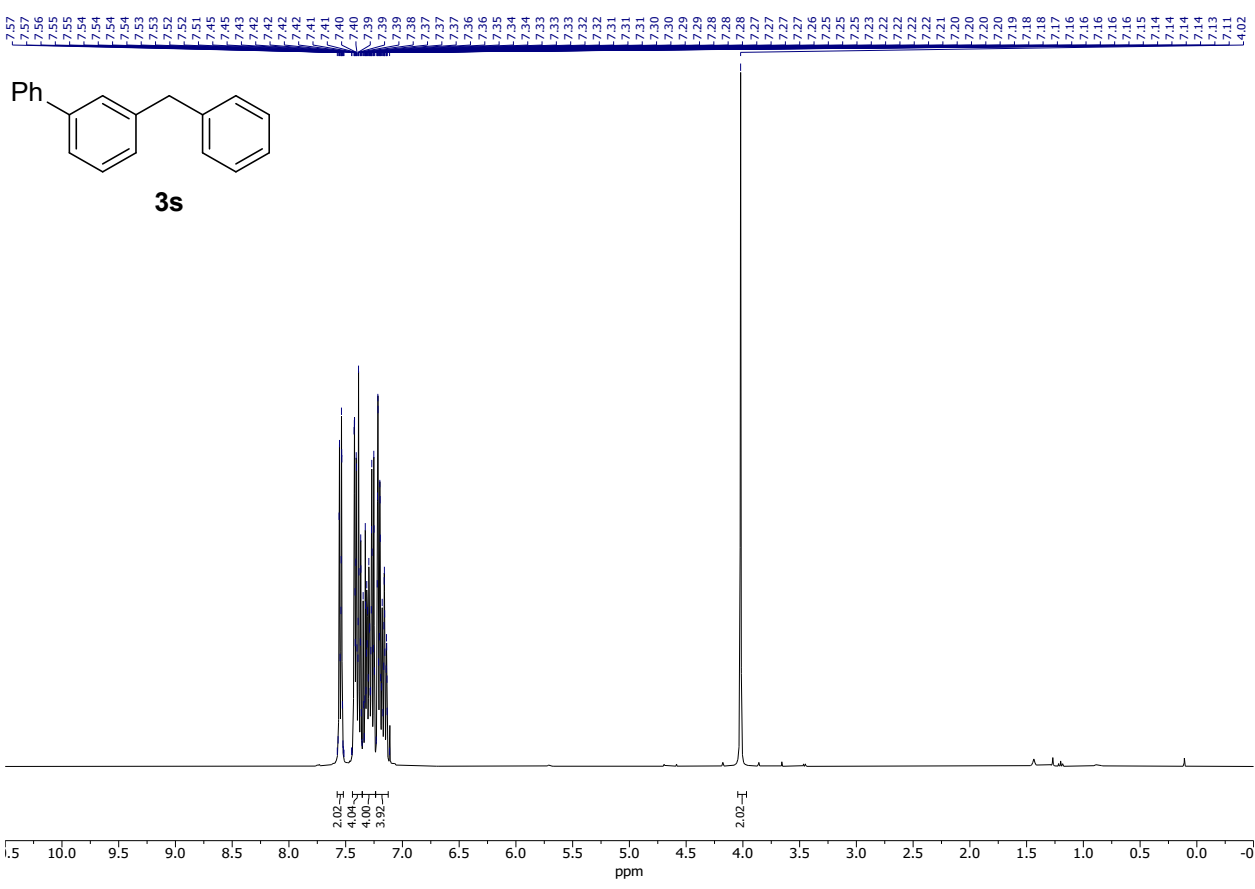

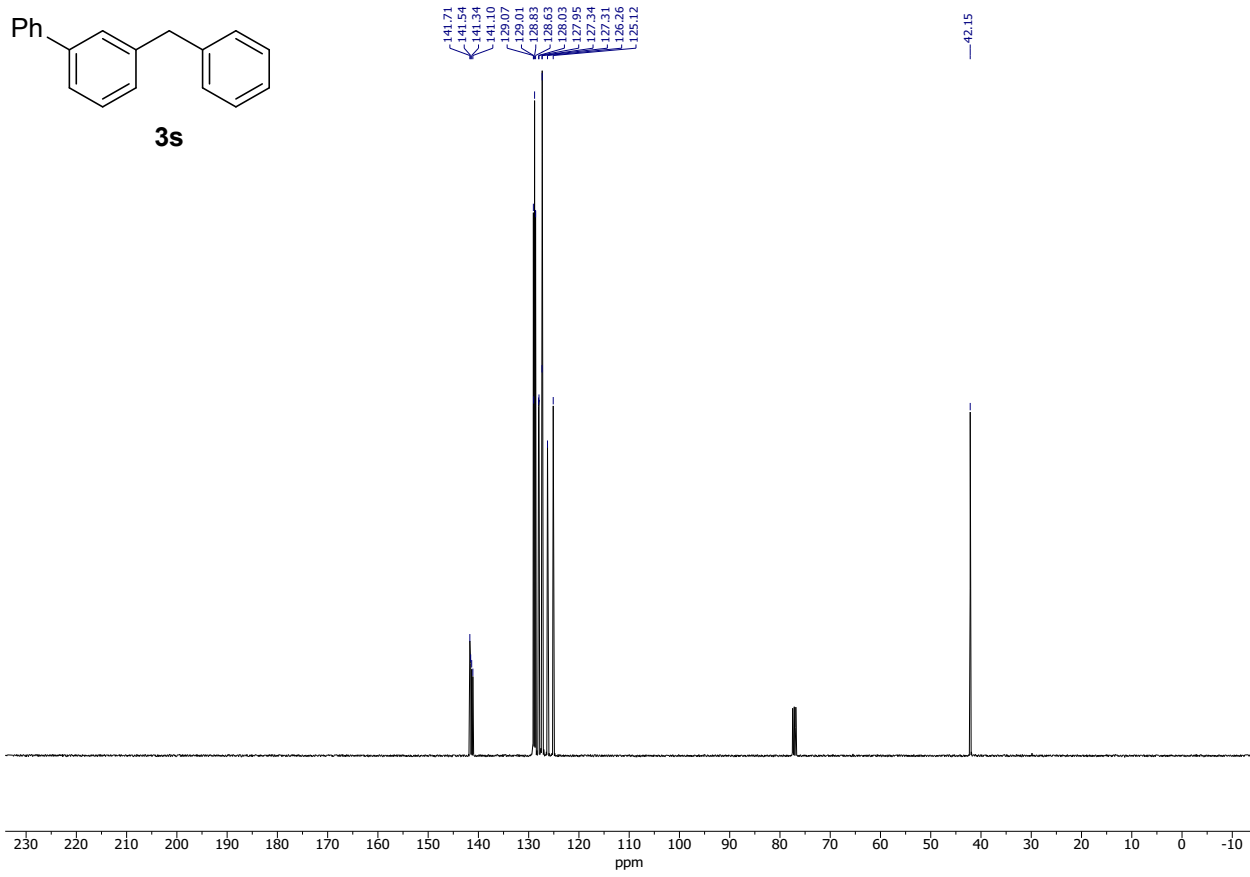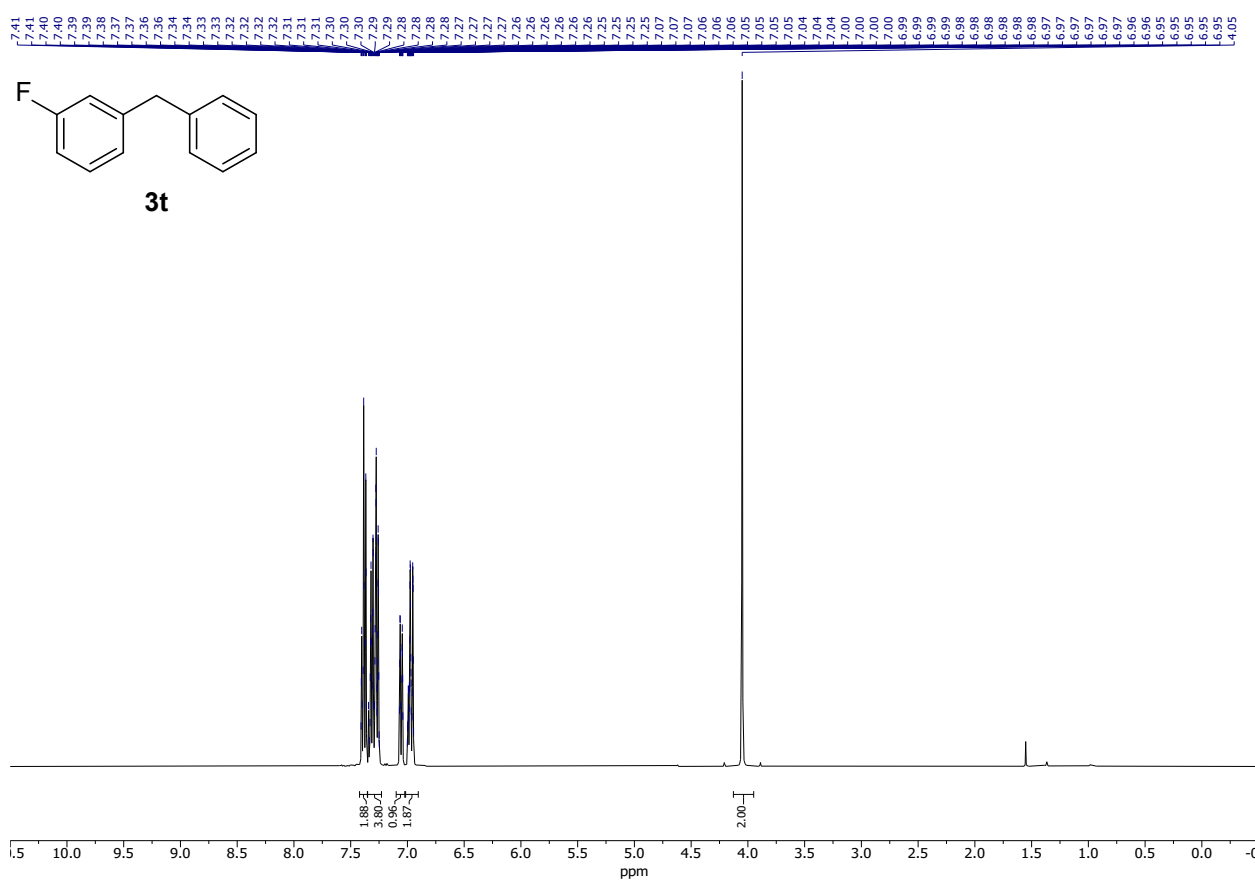

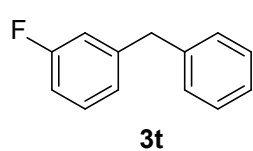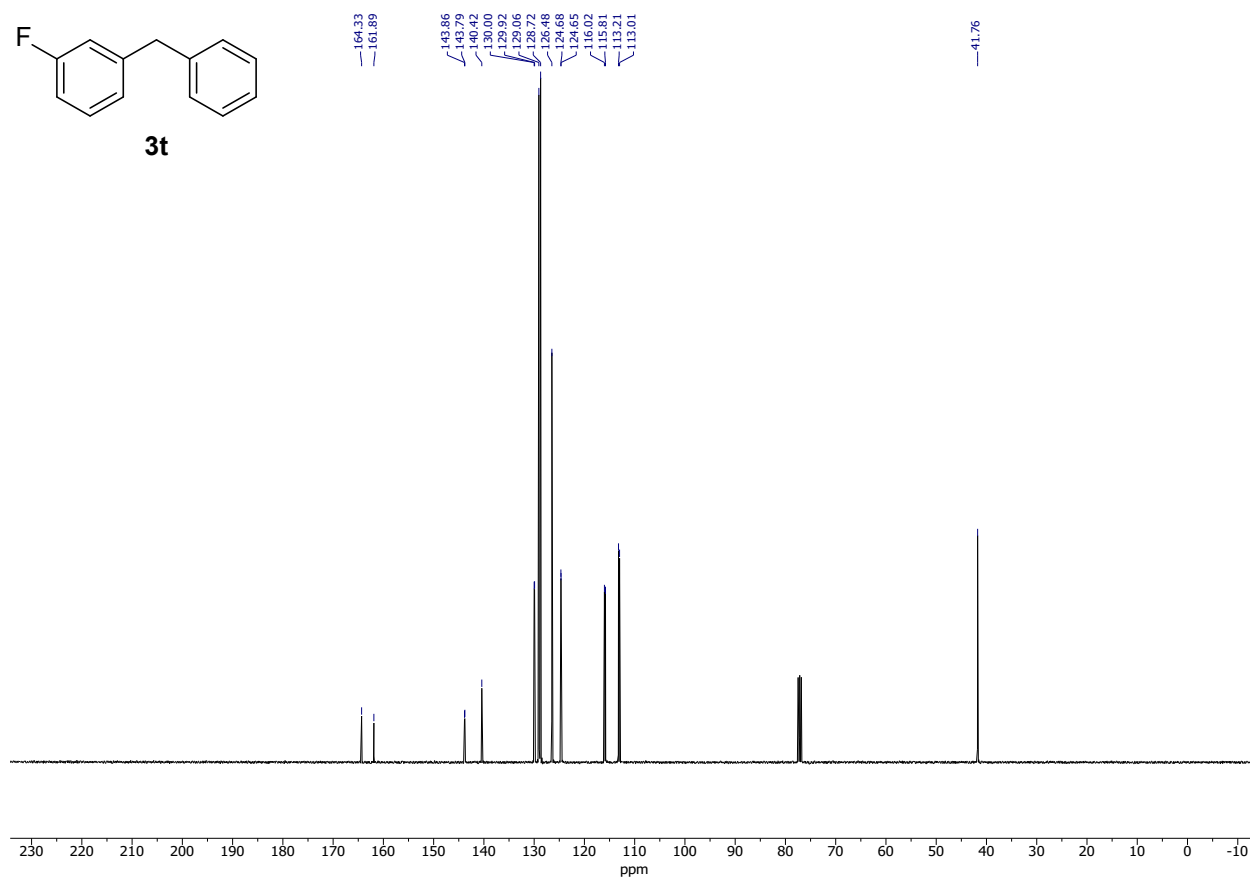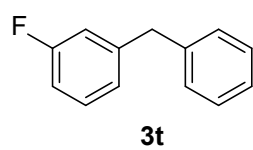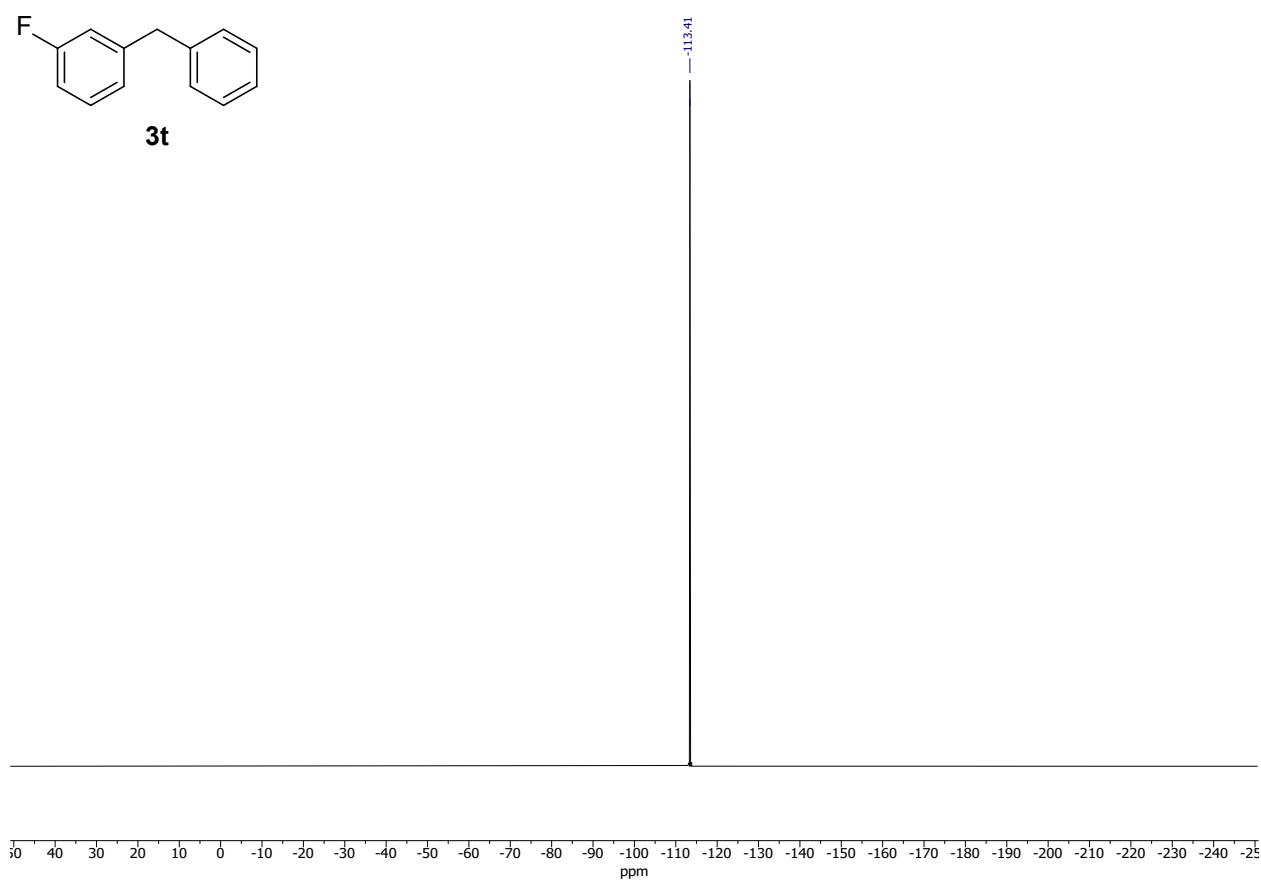



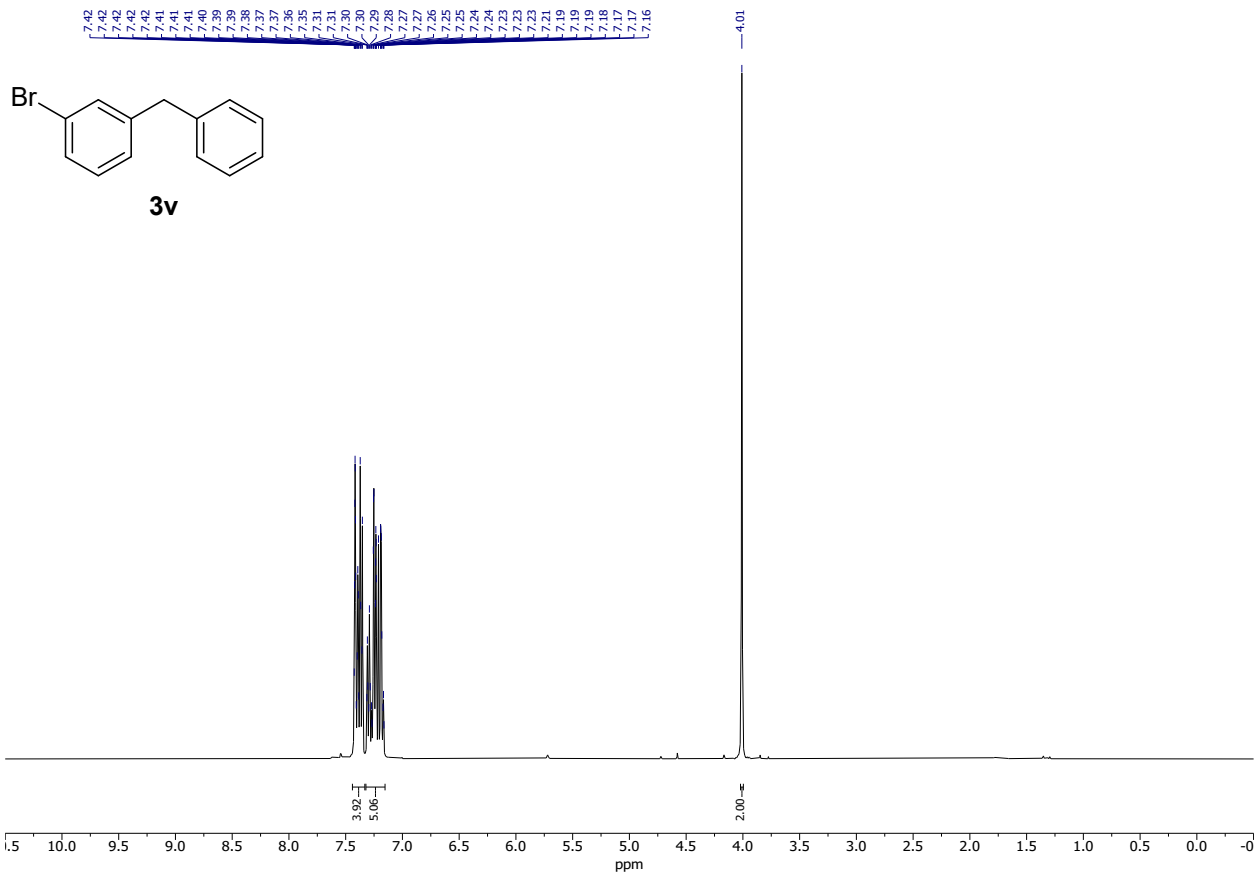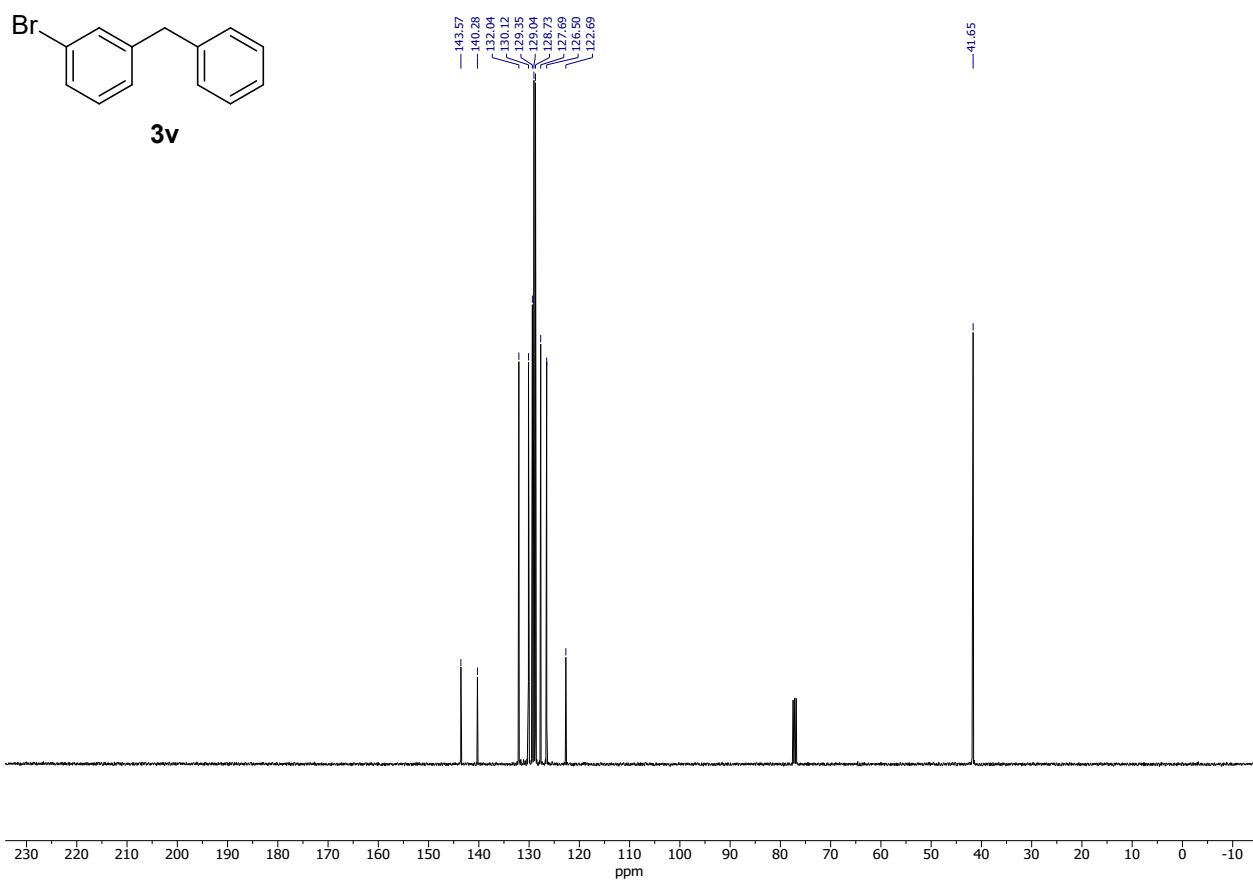





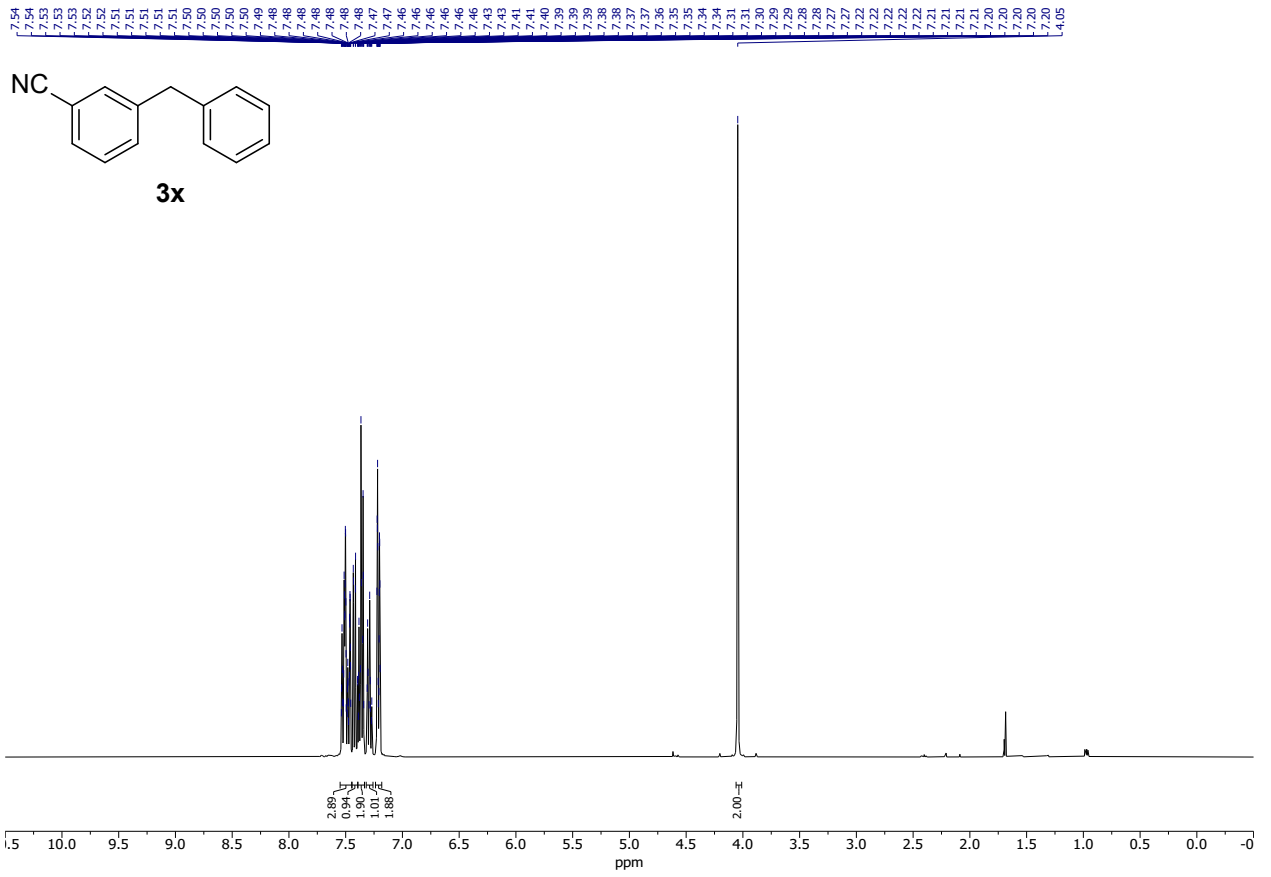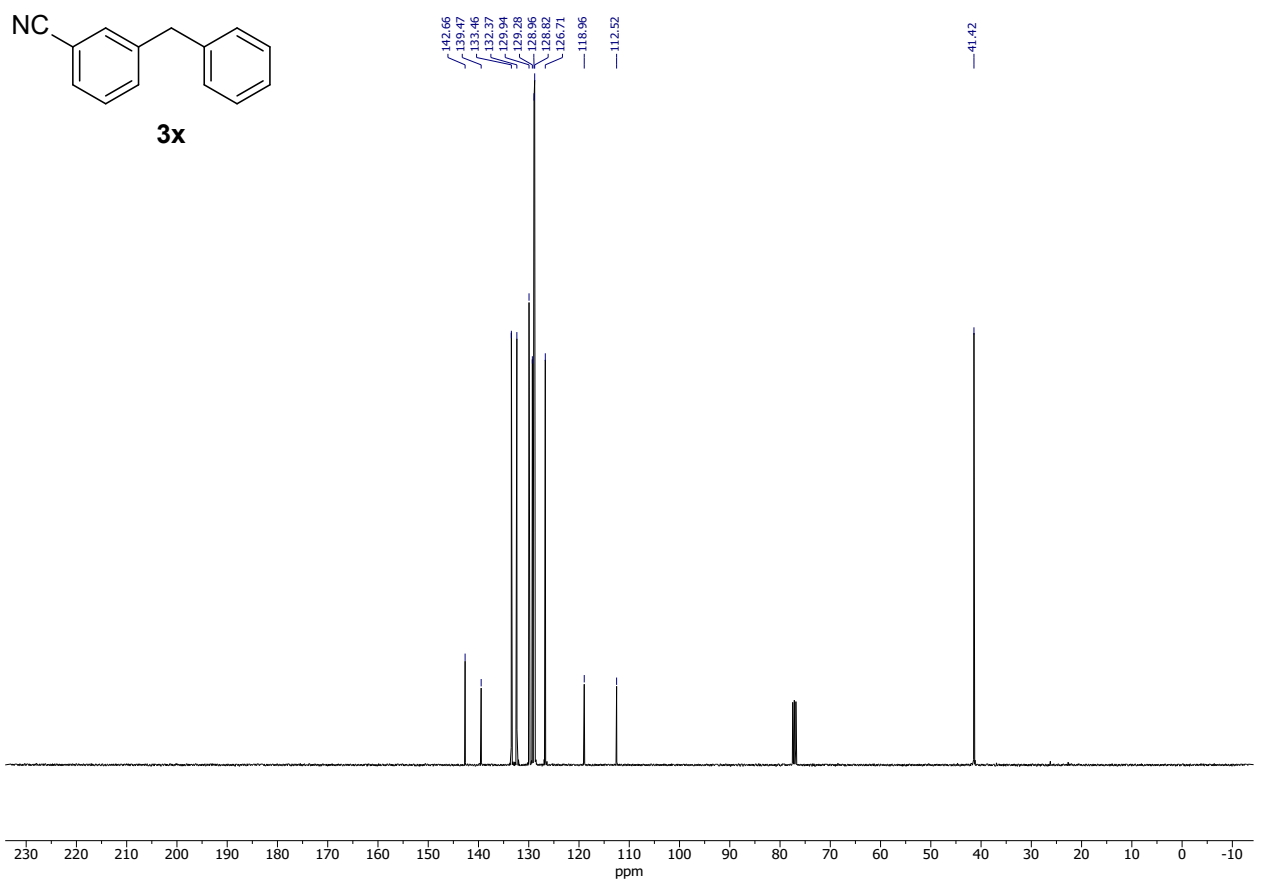



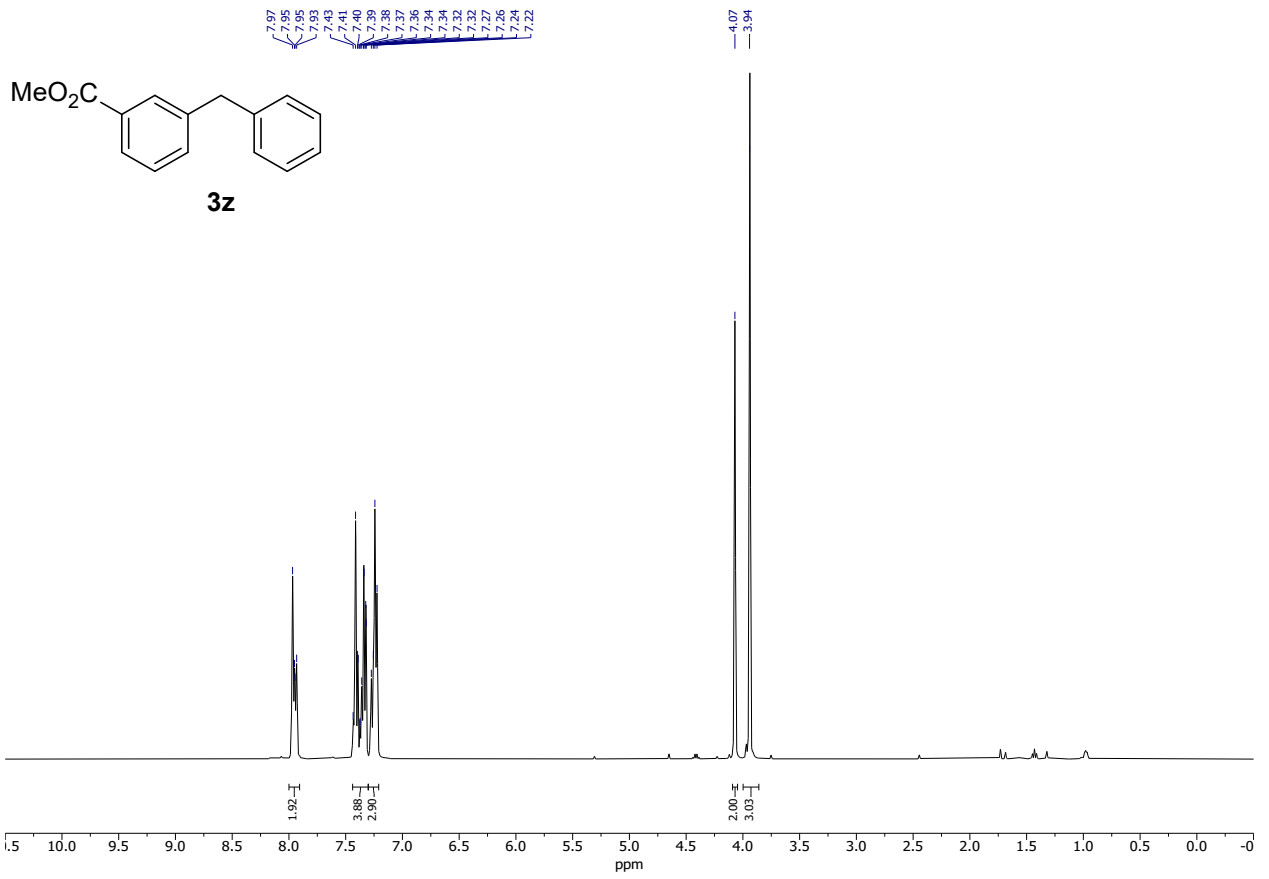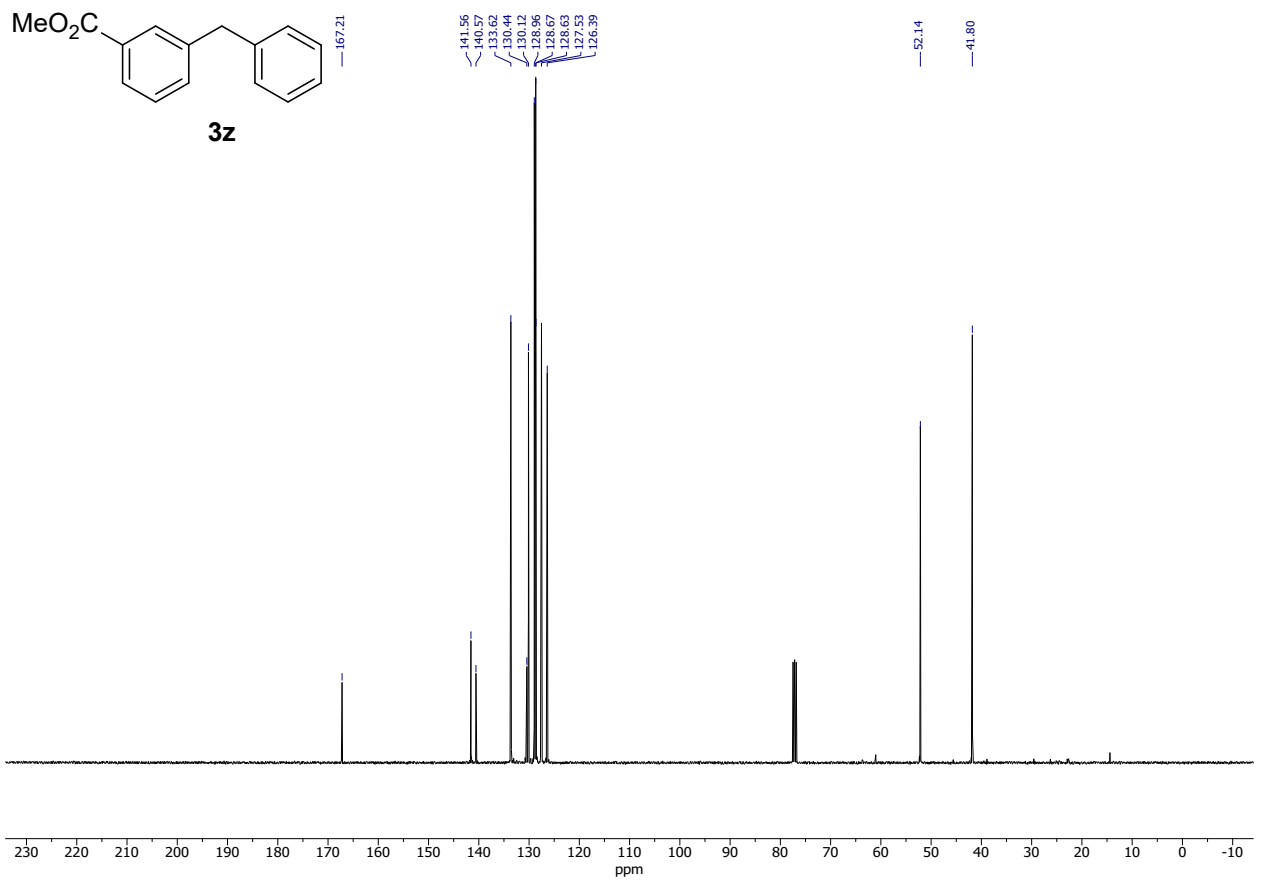

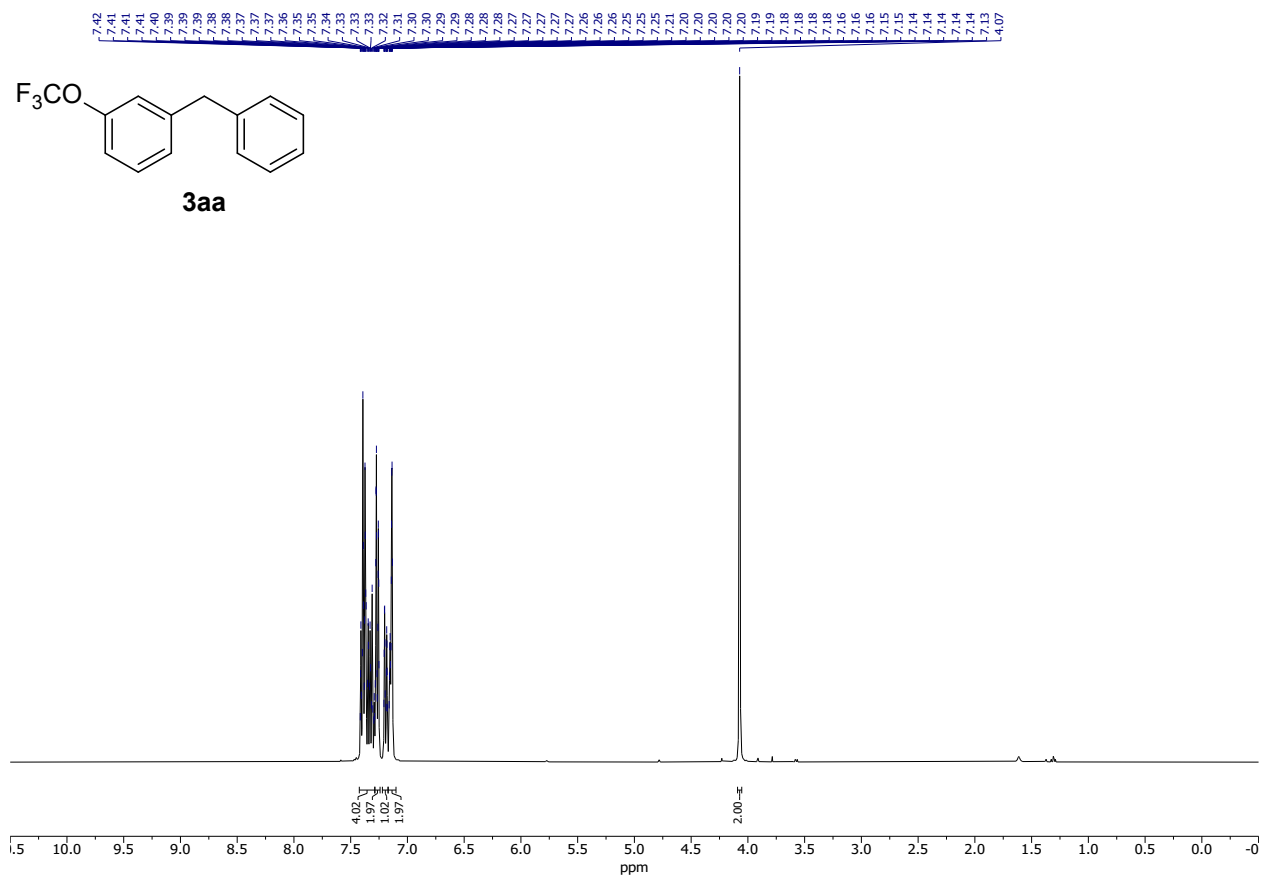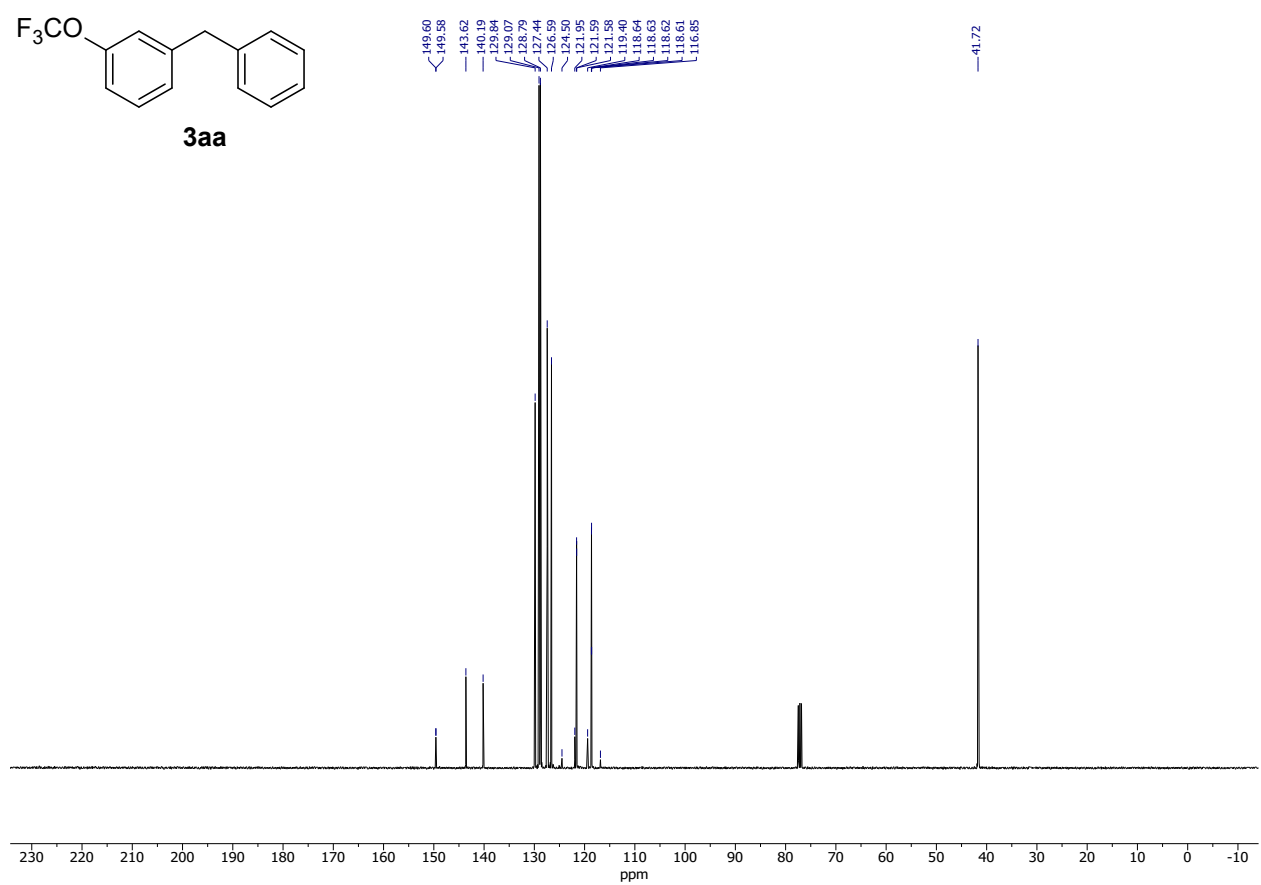

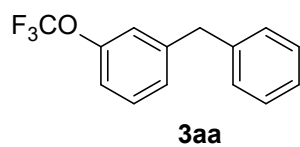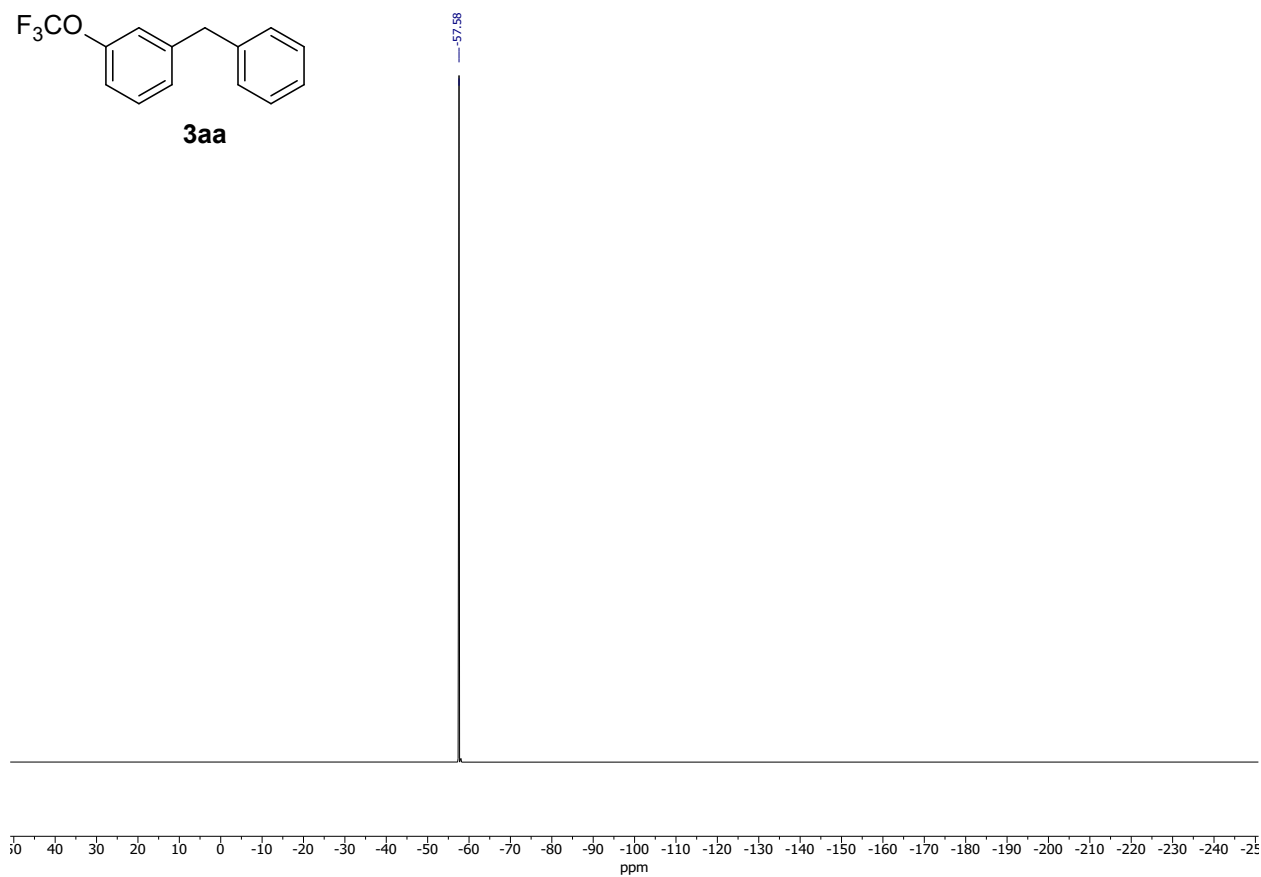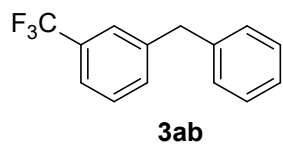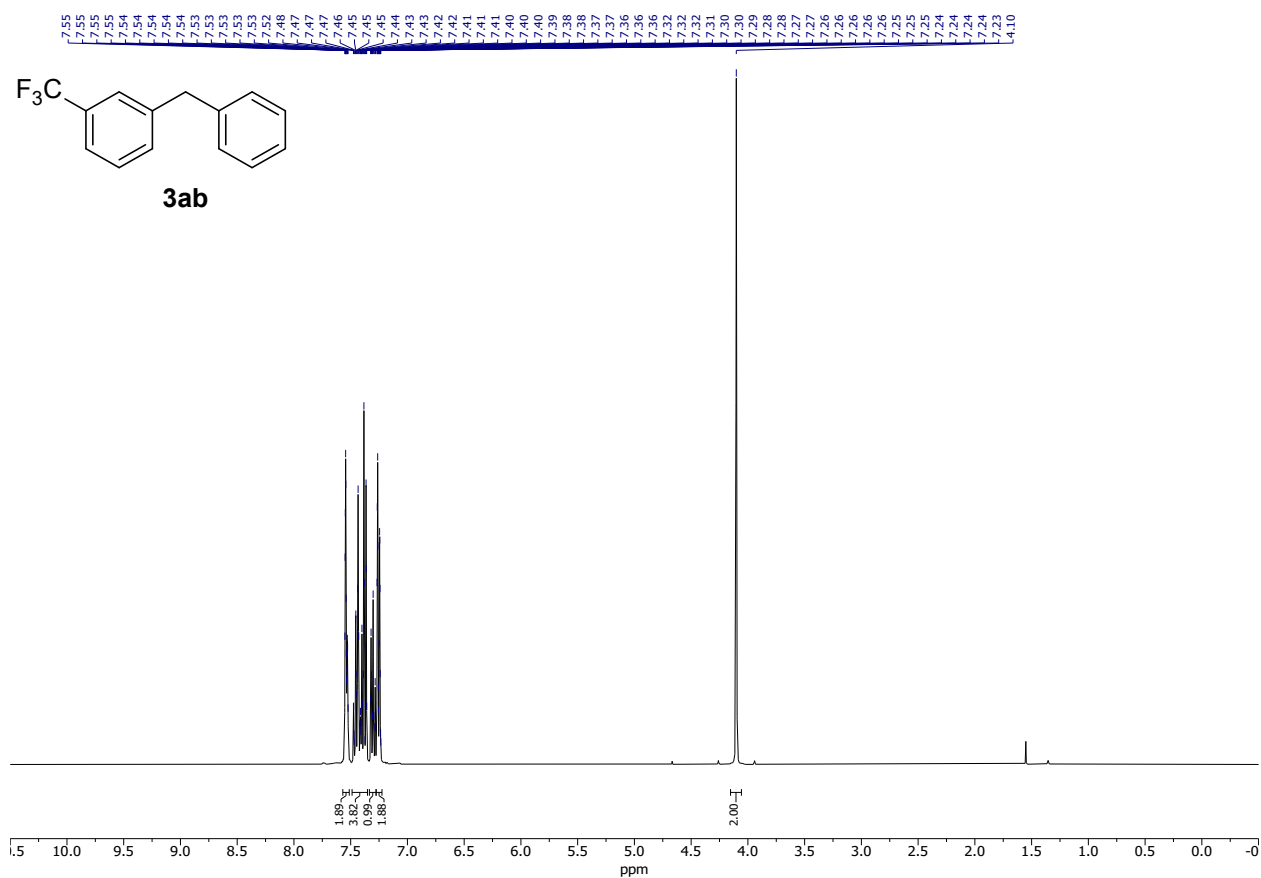

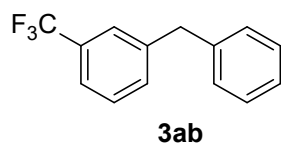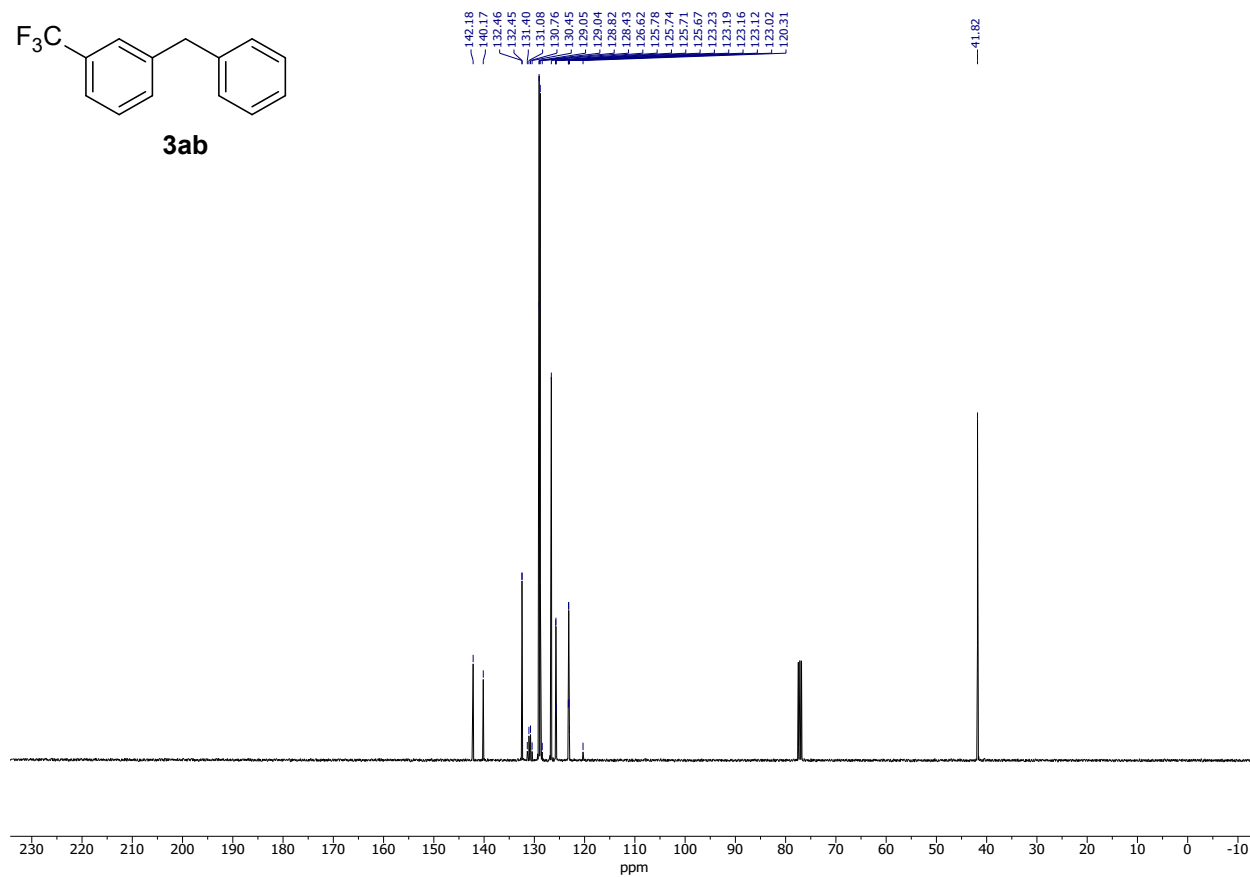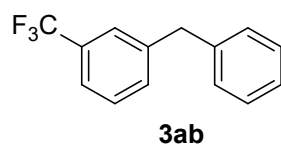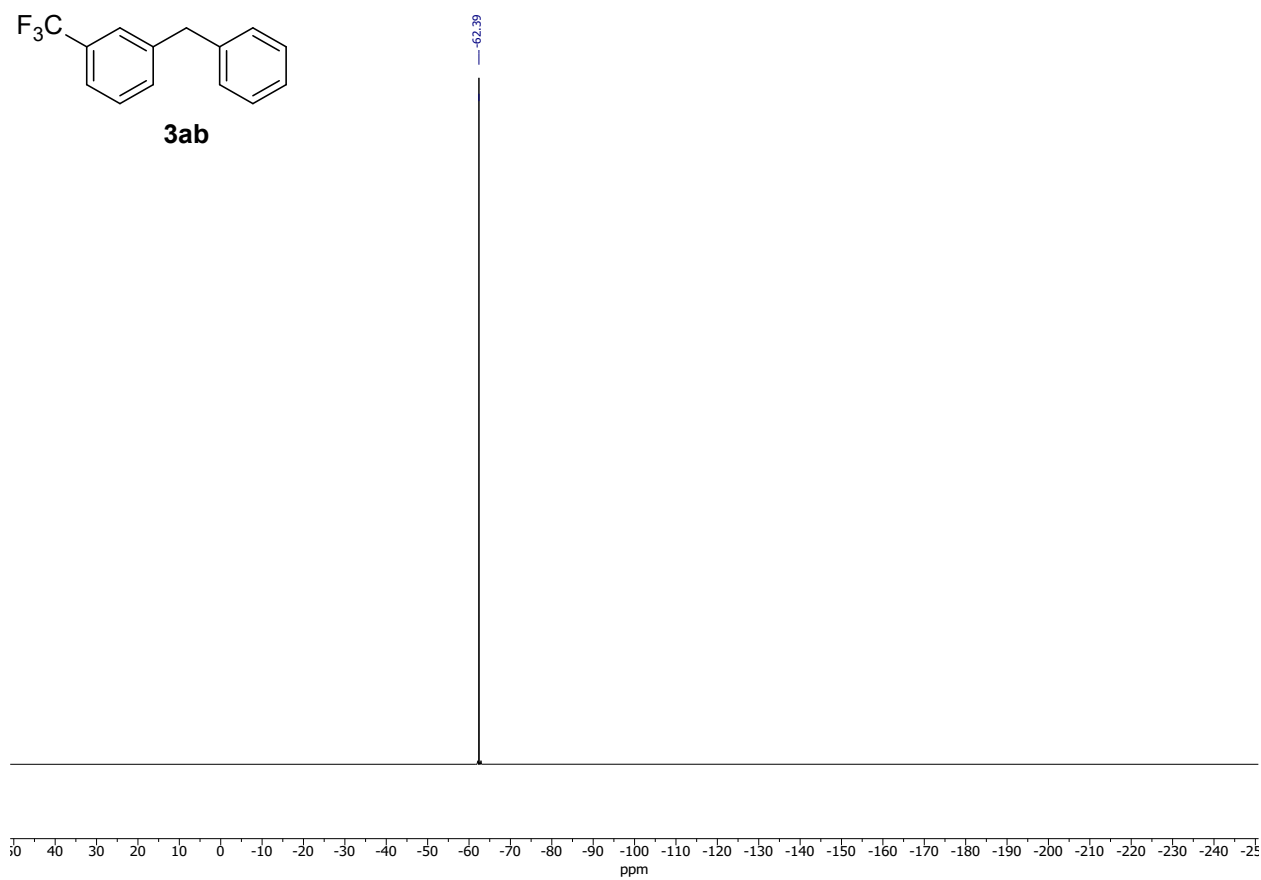

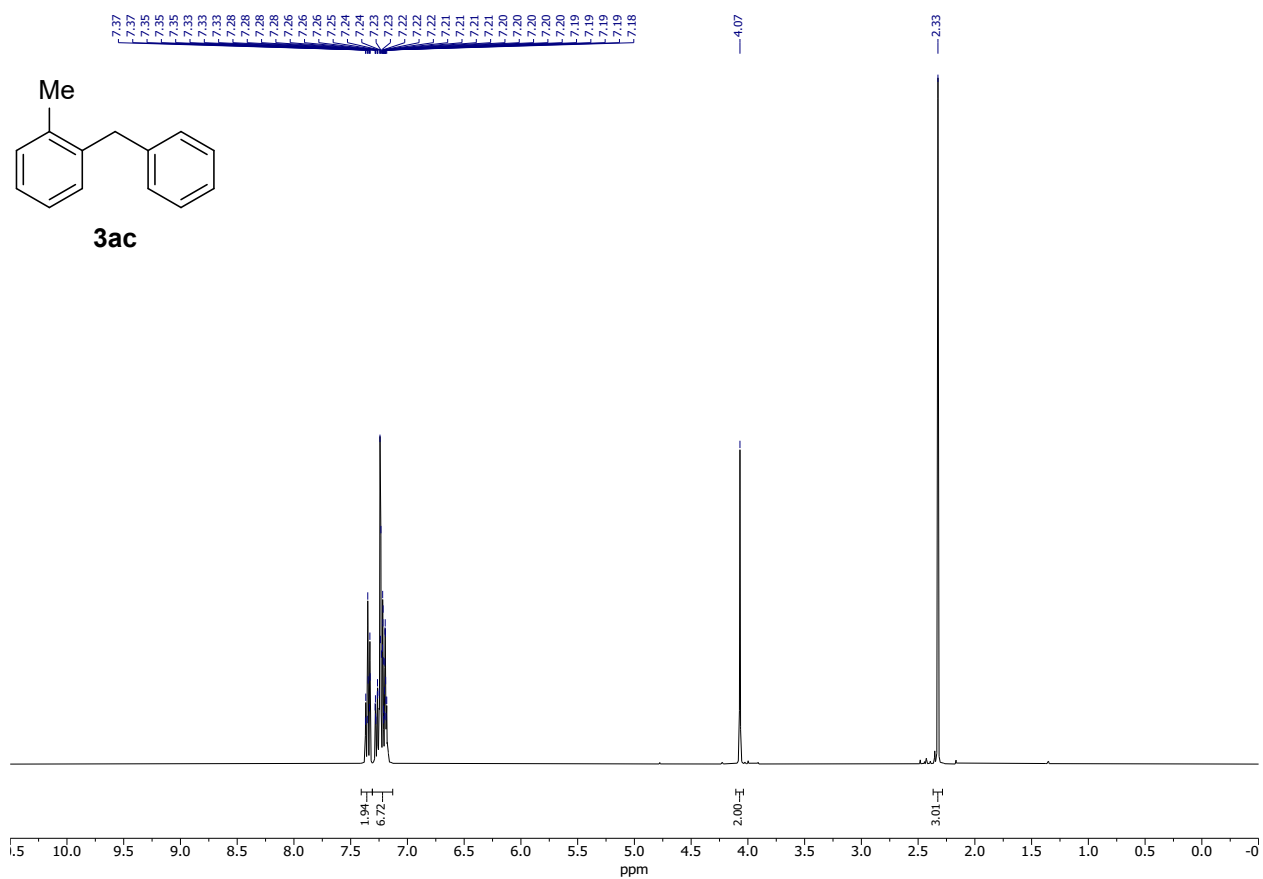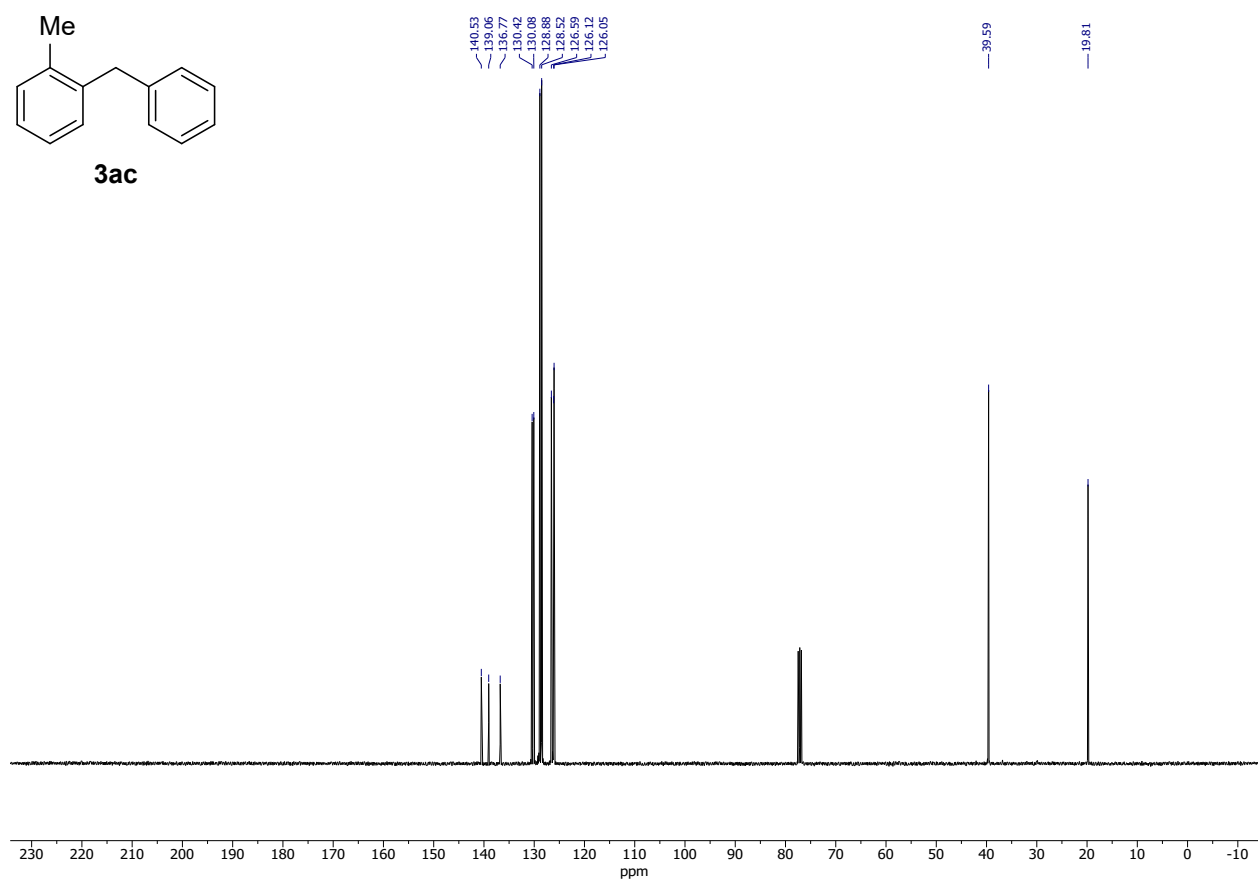

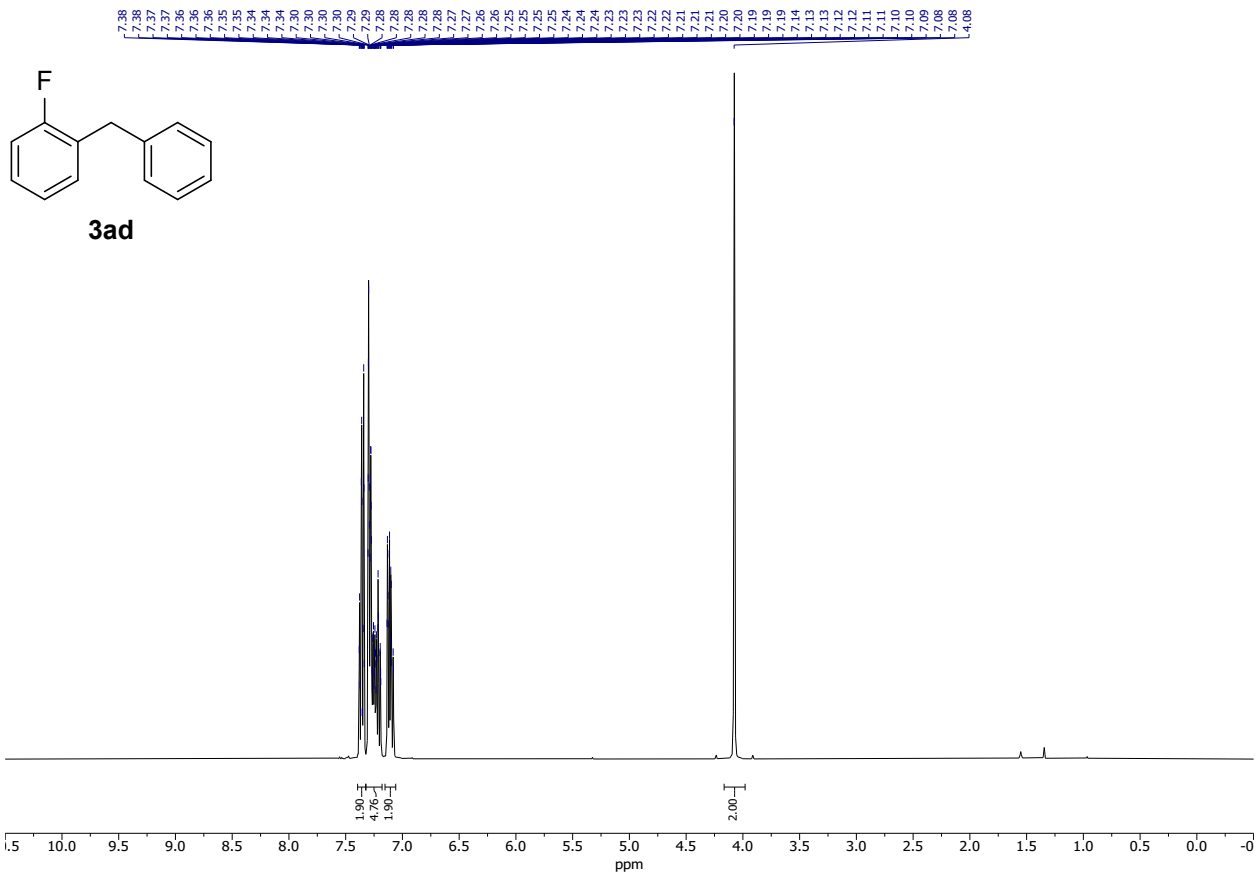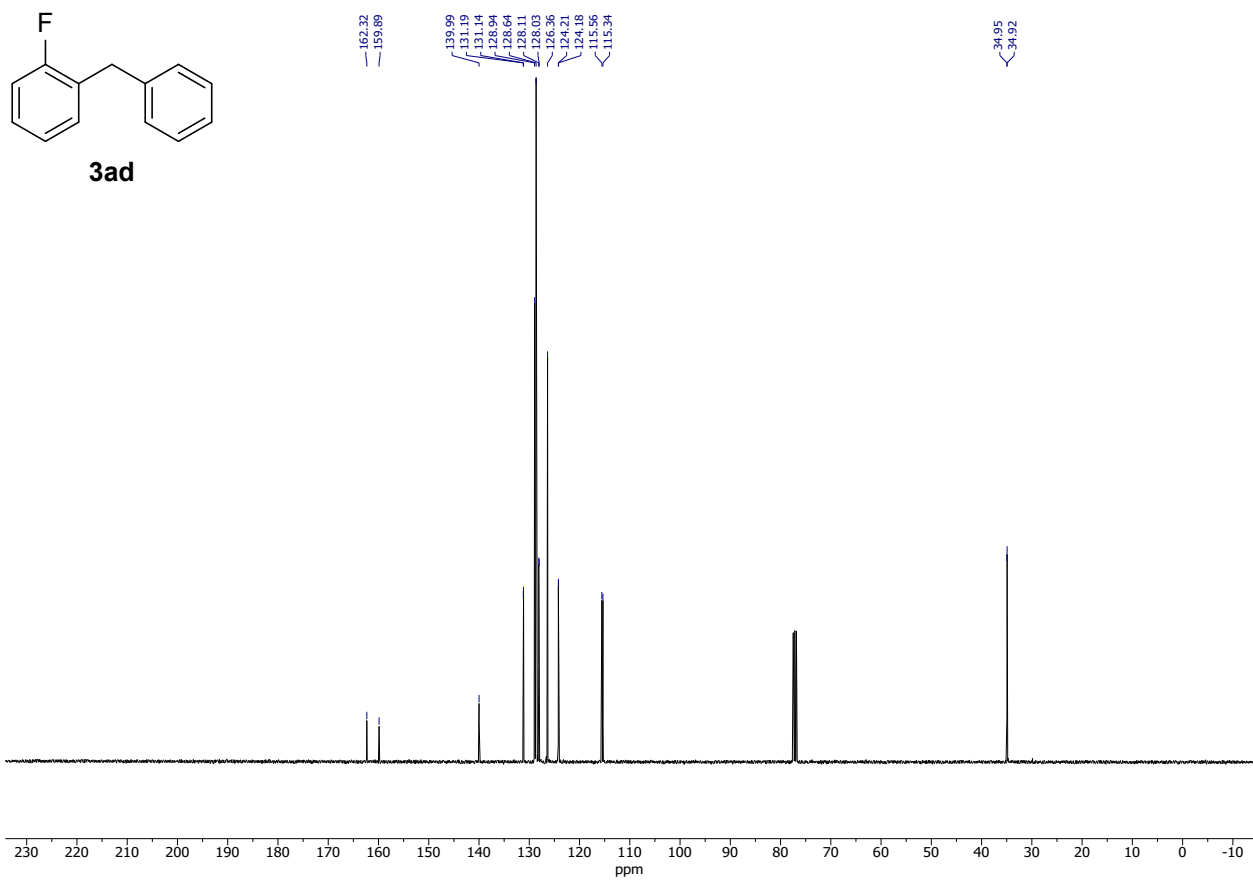



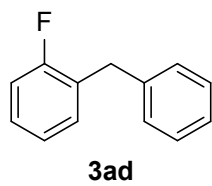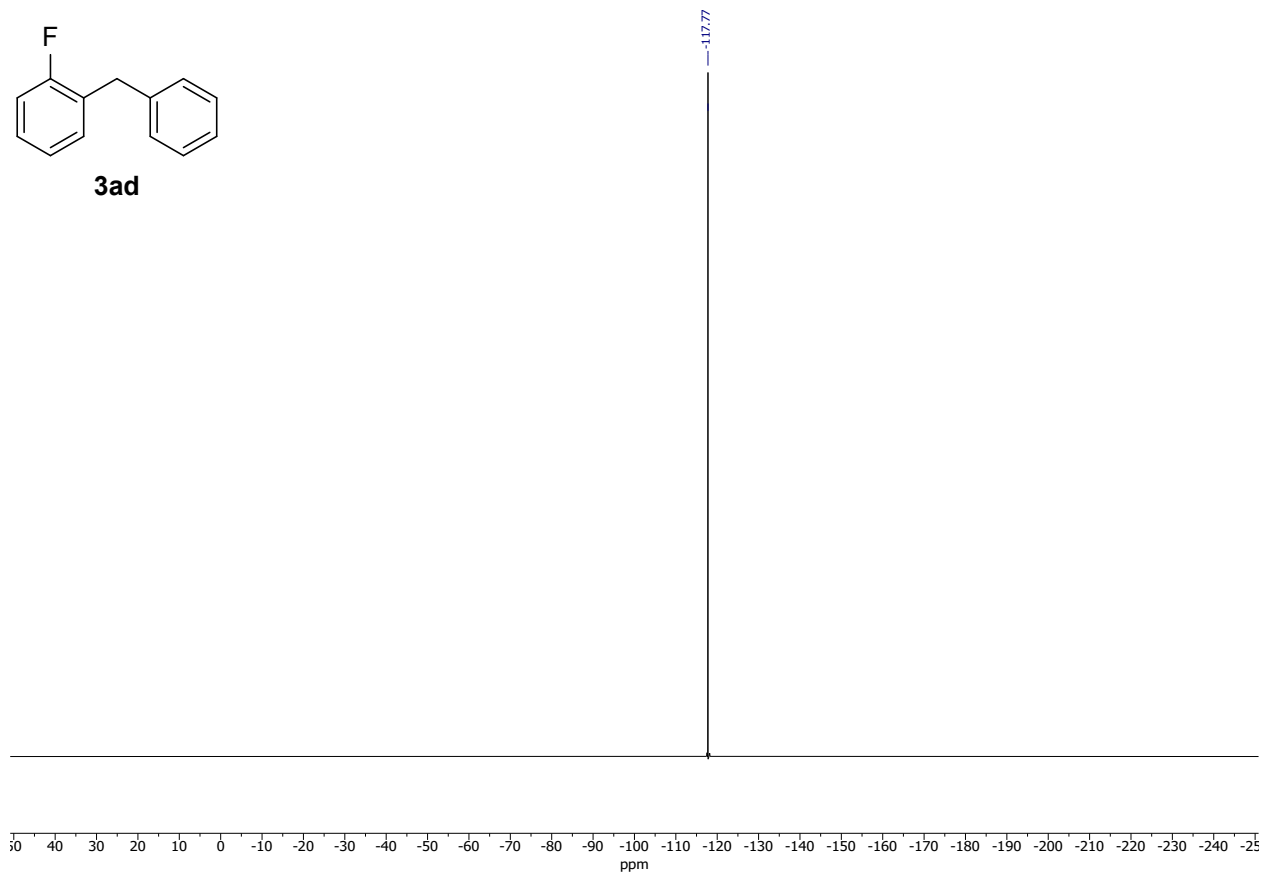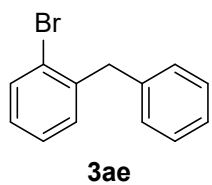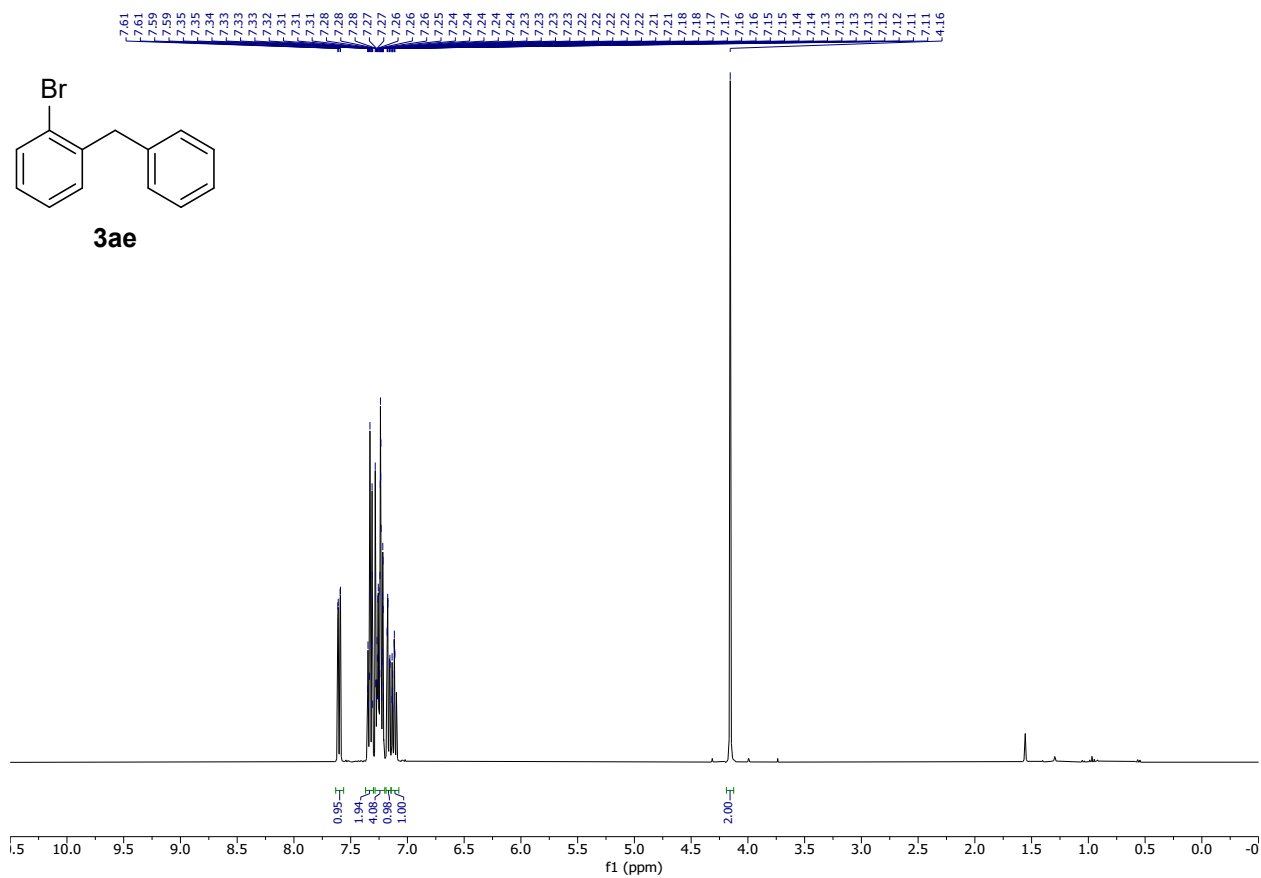



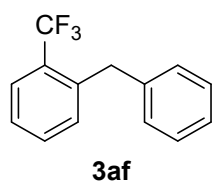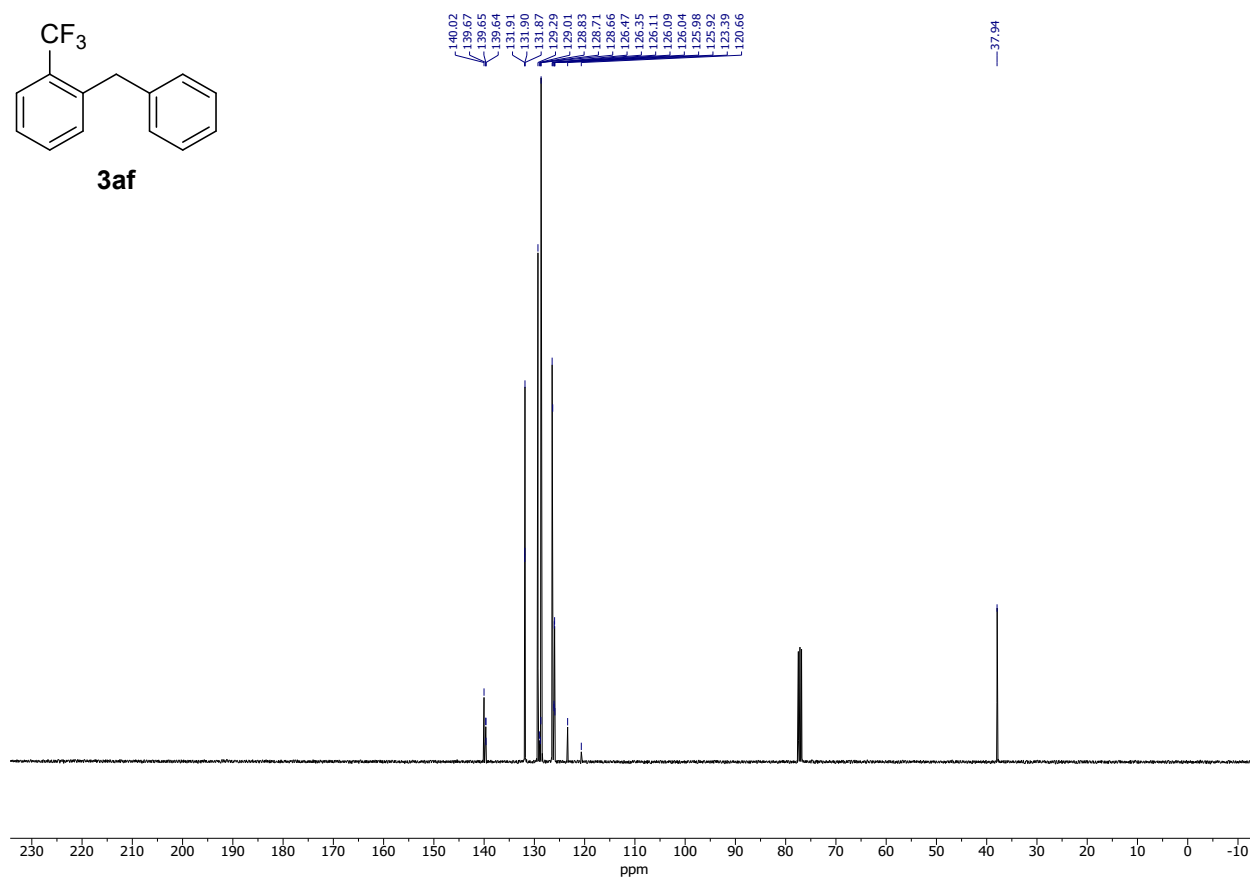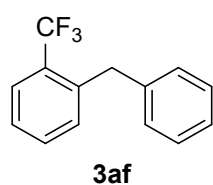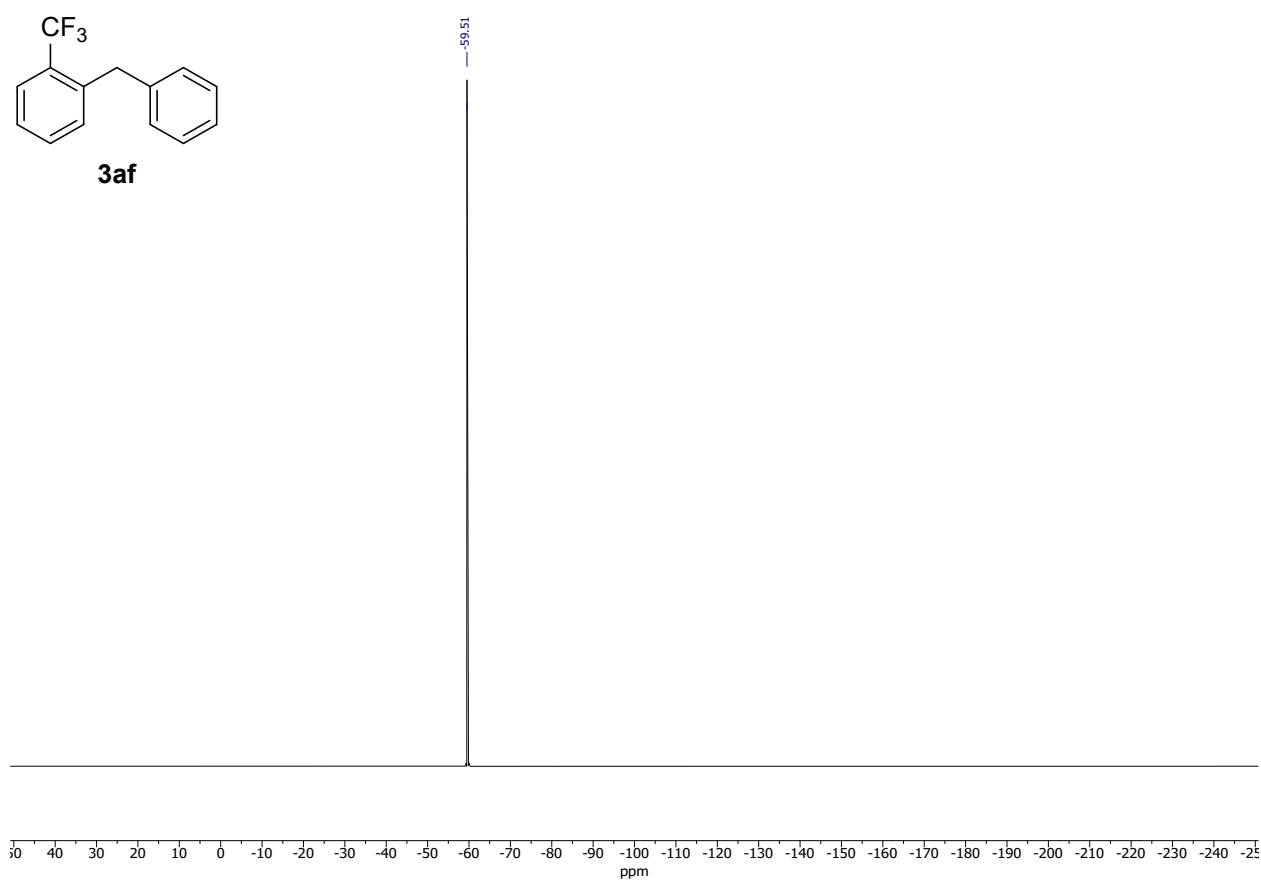

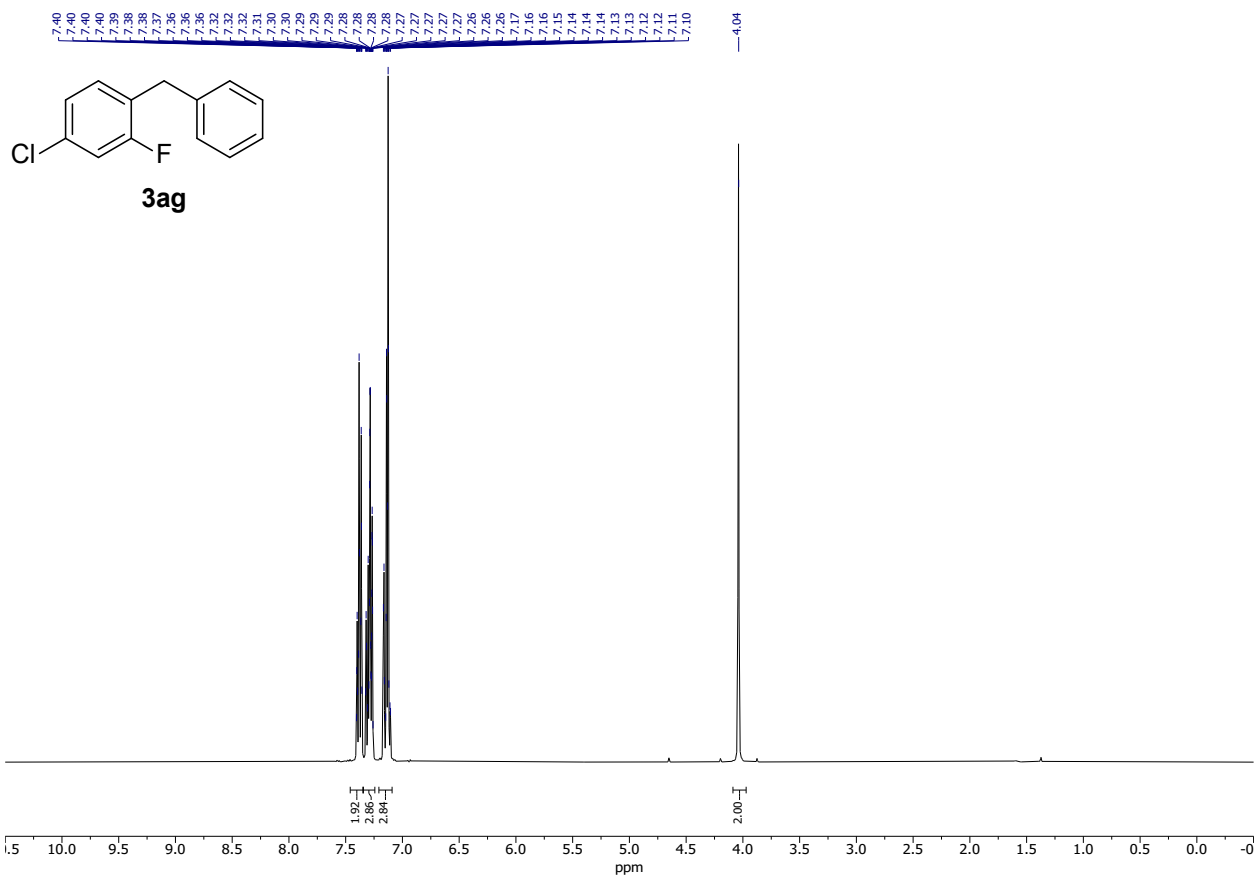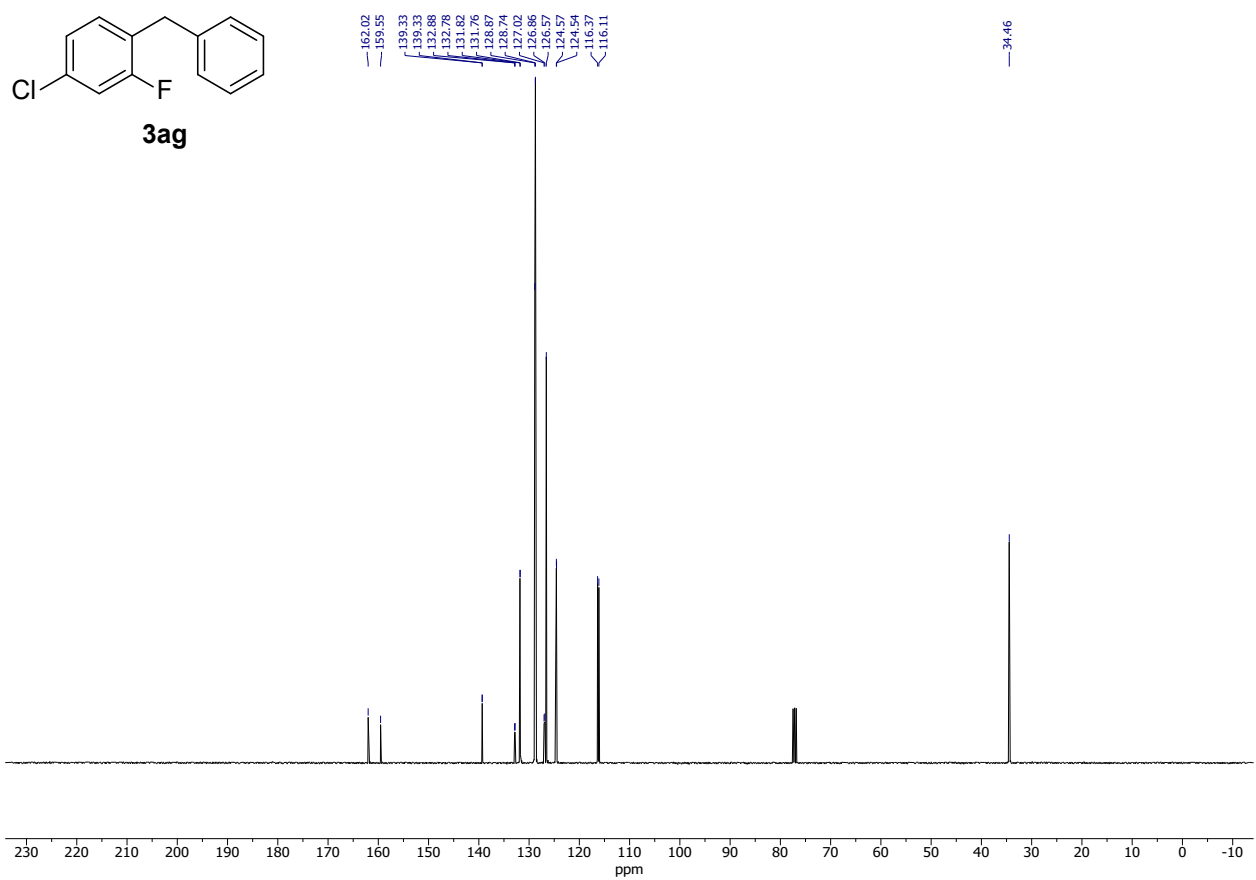

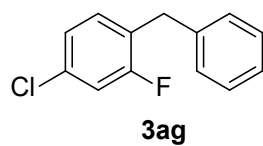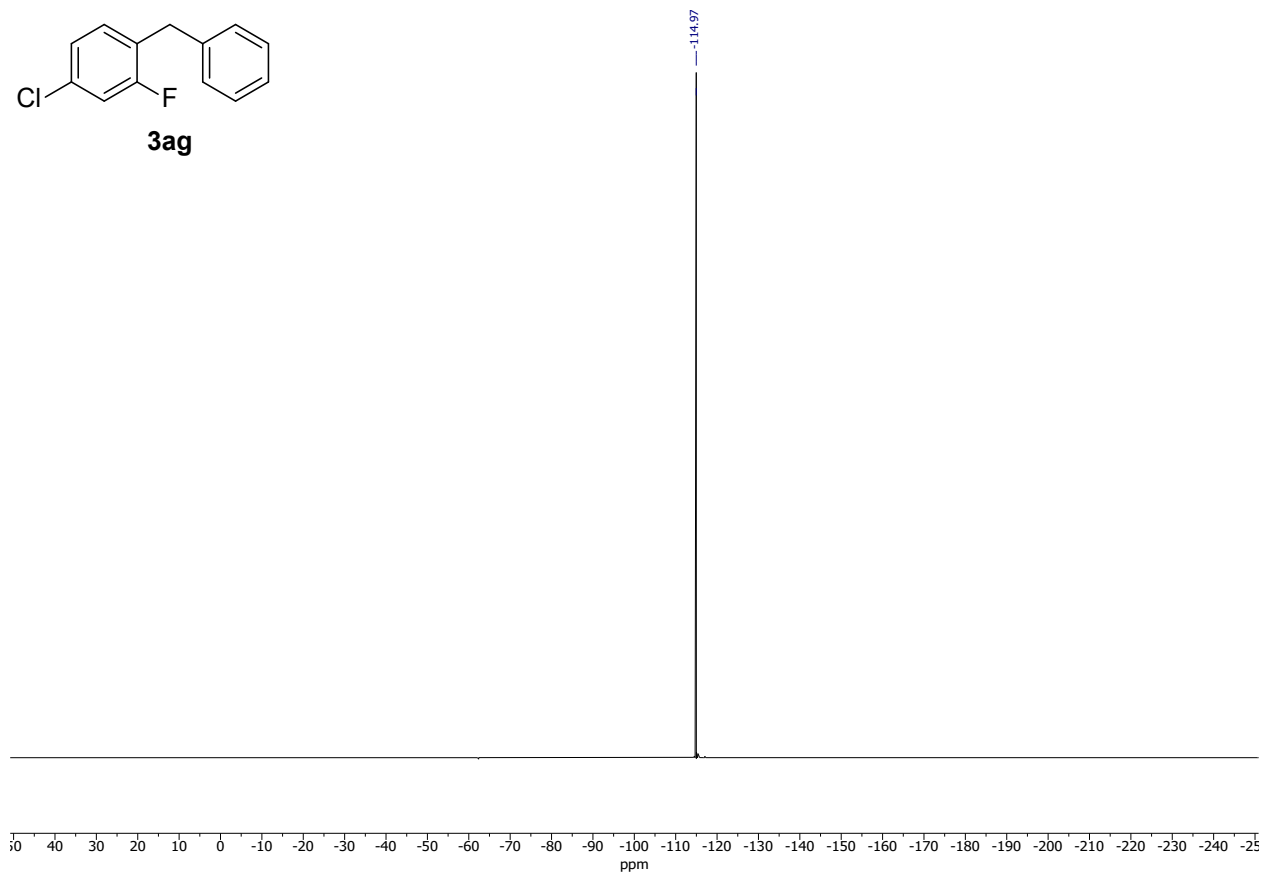

7.37  
 7.36  
 7.35  
 7.35  
 7.35  
 7.34  
 7.34  
 7.33  
 7.29  
 7.29  
 7.28  
 7.28  
 7.28  
 7.27  
 7.26  
 7.26  
 7.26  
 7.25  
 7.25  
 7.24  
 7.23  
 7.23  
 7.22  
 7.21  
 7.20  
 7.20  
 7.19  
 7.18  
 6.99  
 6.99  
 6.96  
 6.96  
 6.95  
 6.95  
 6.94  
 6.94  
 6.93  
 6.92  
 6.91  
 6.91  
 4.11  
 4.10

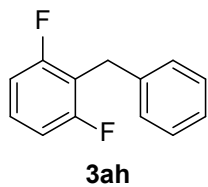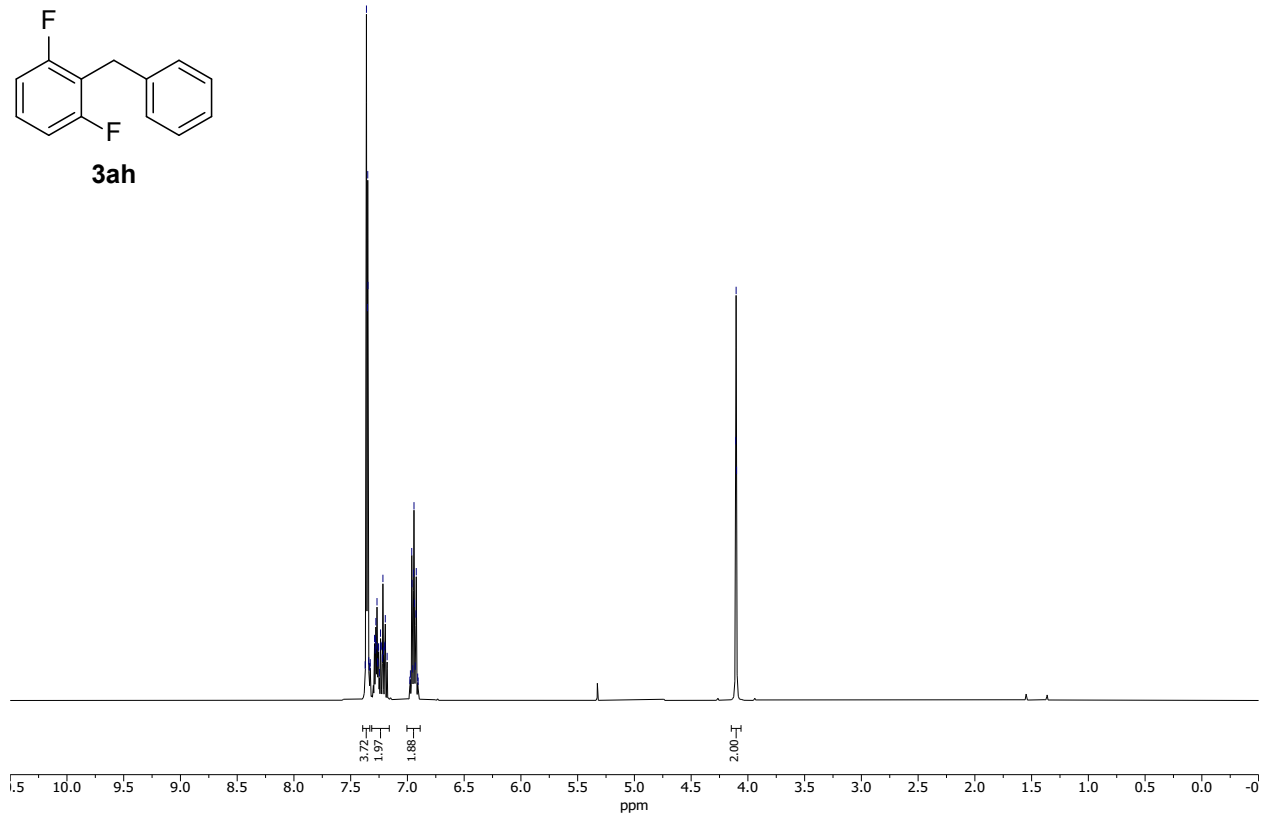

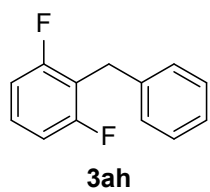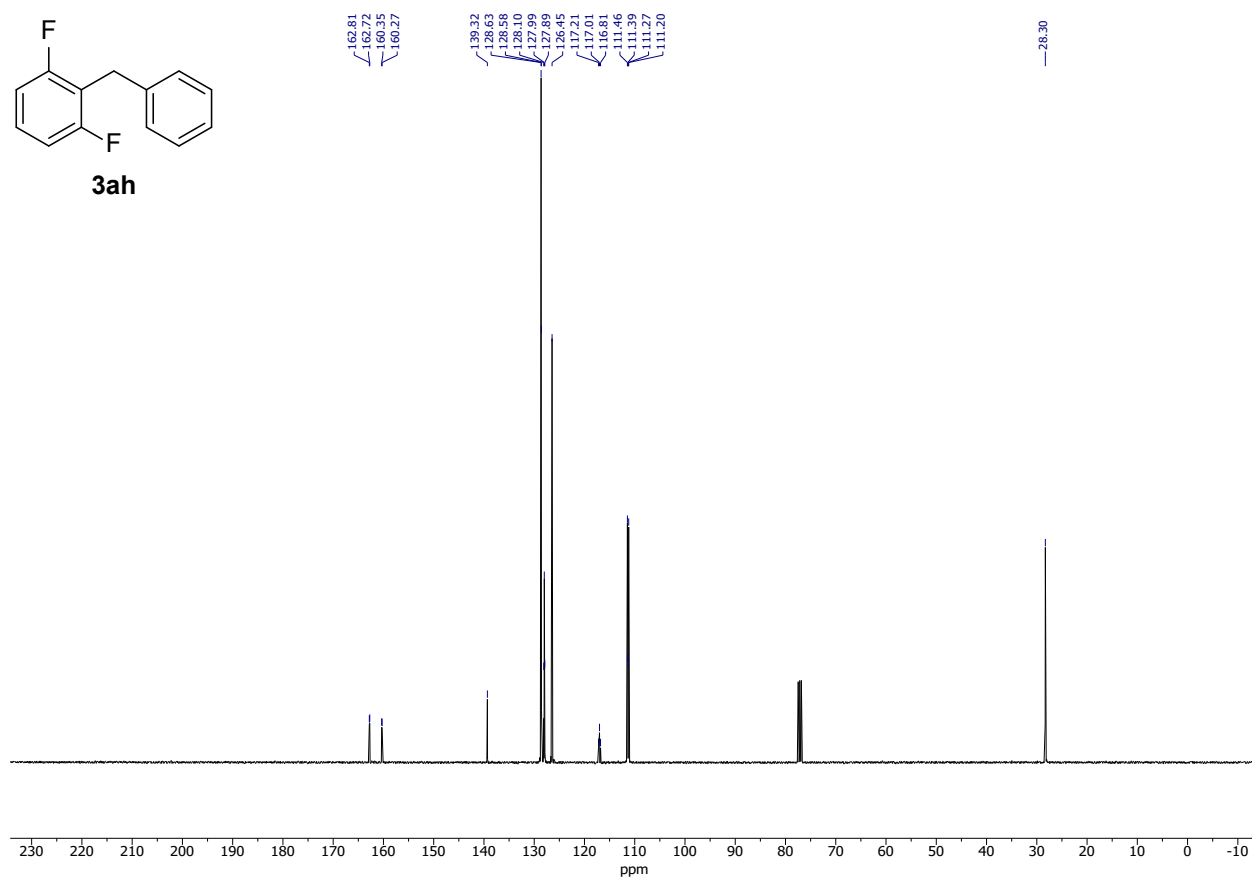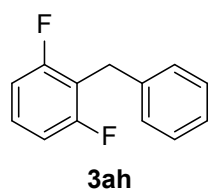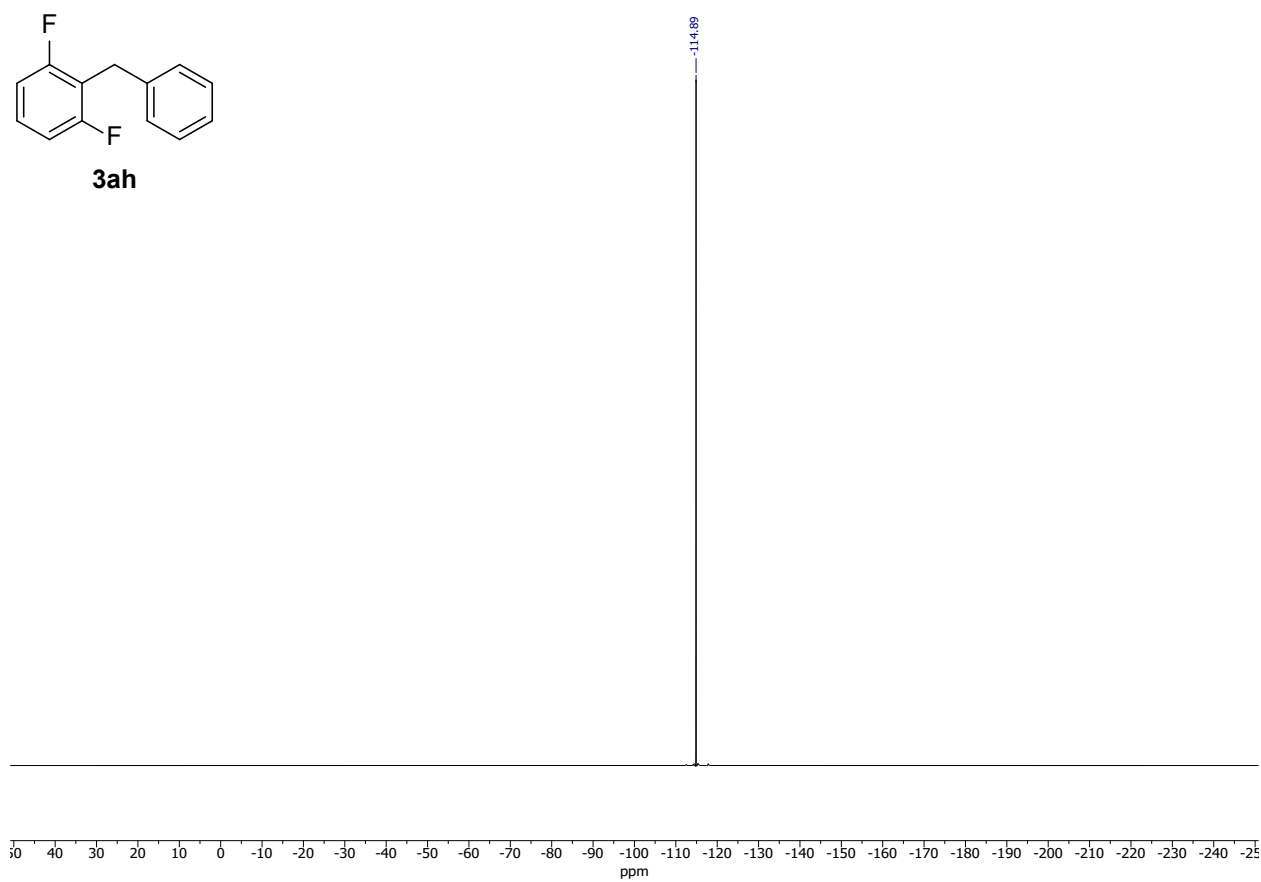

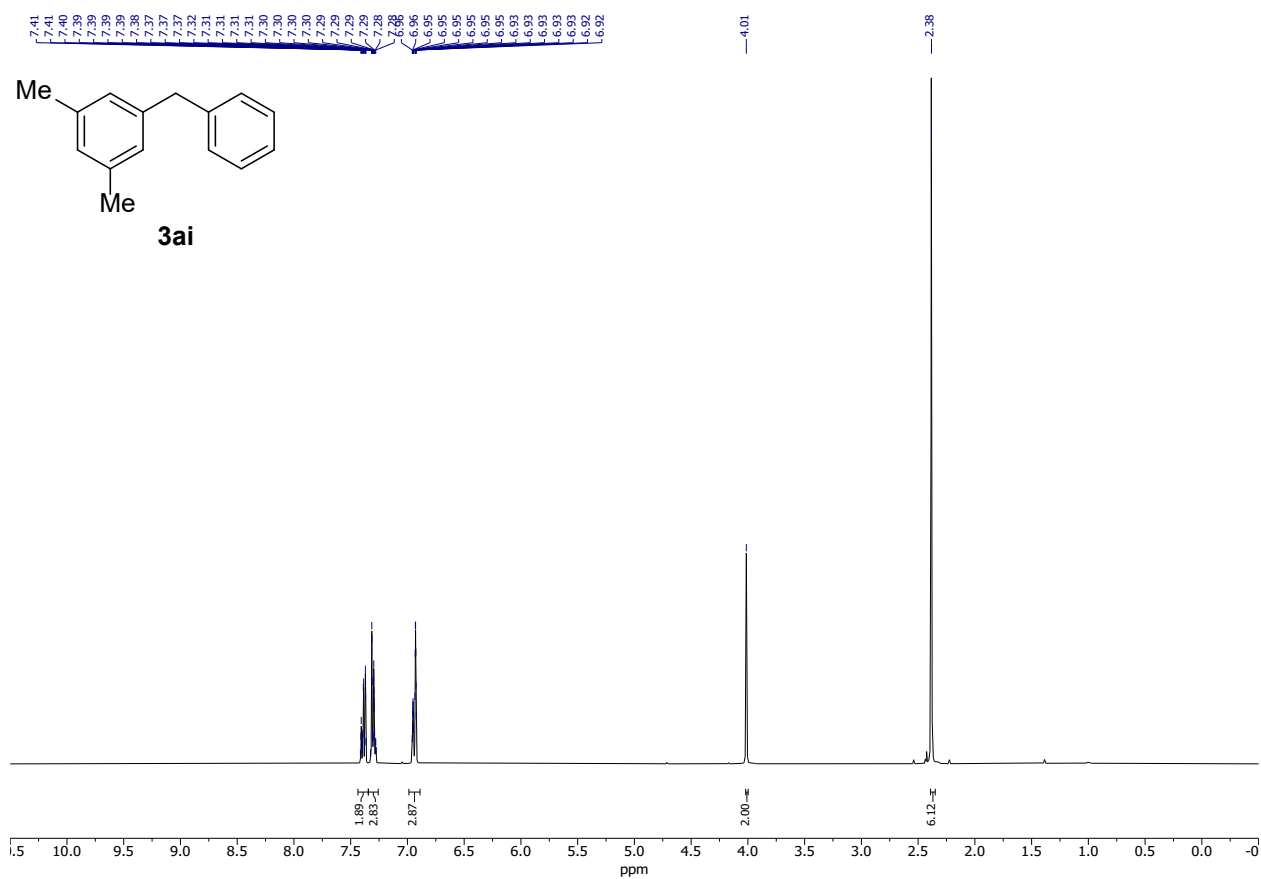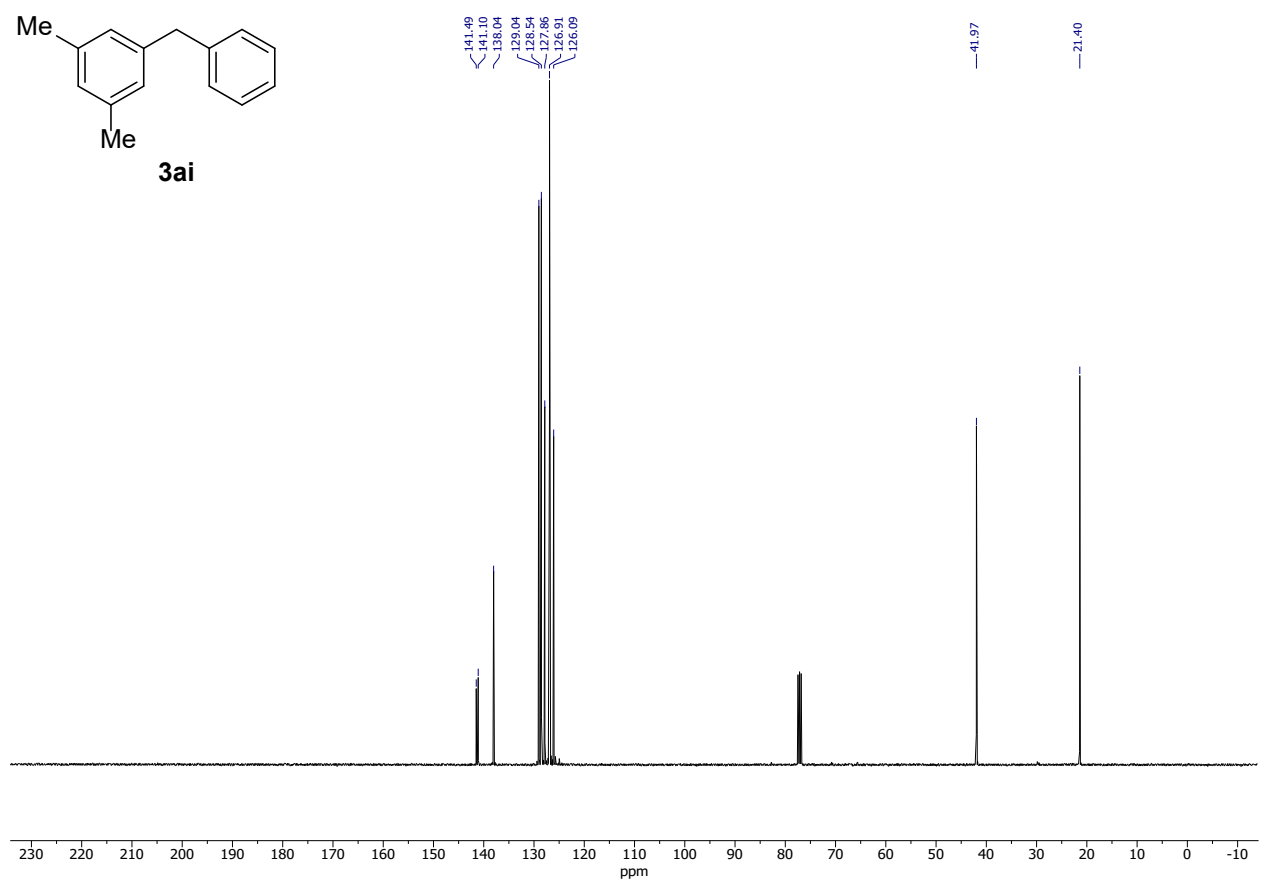

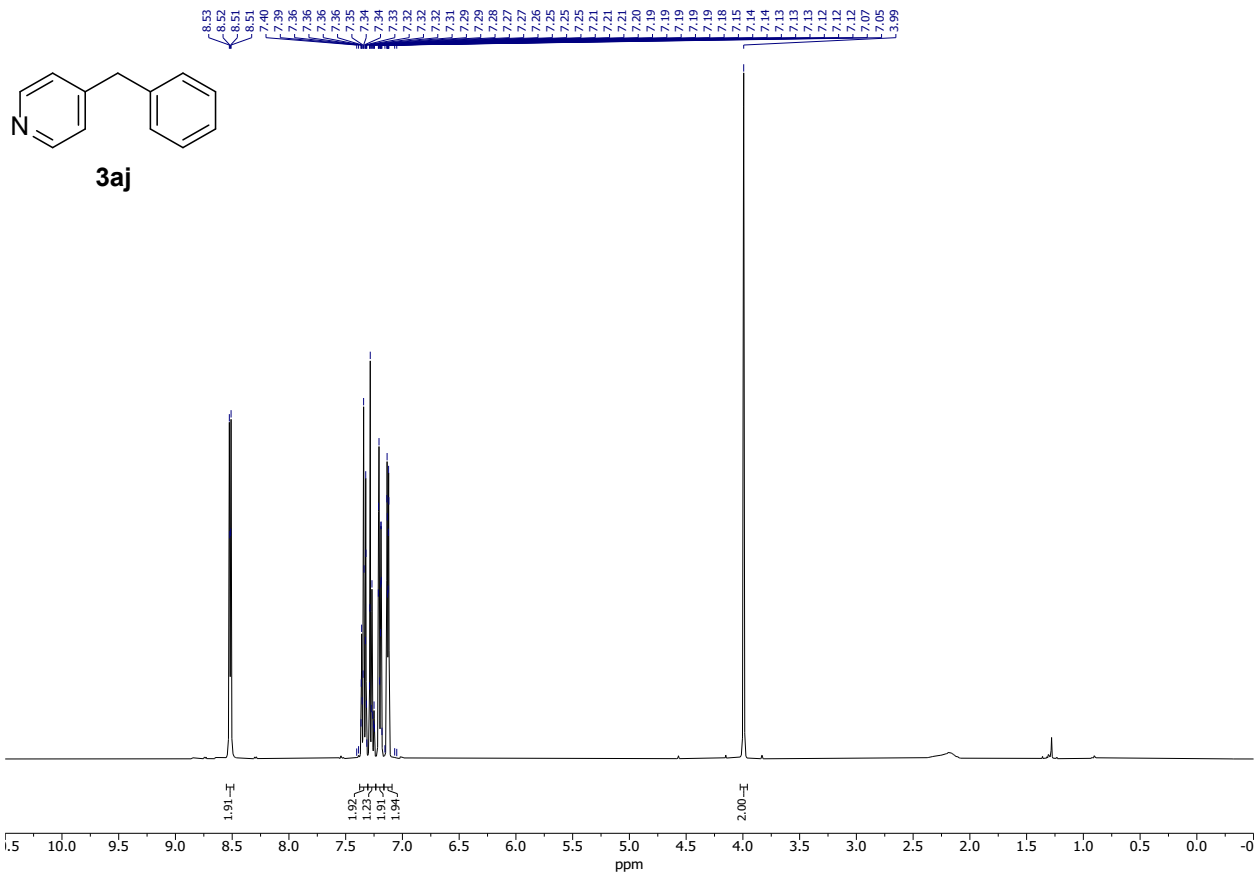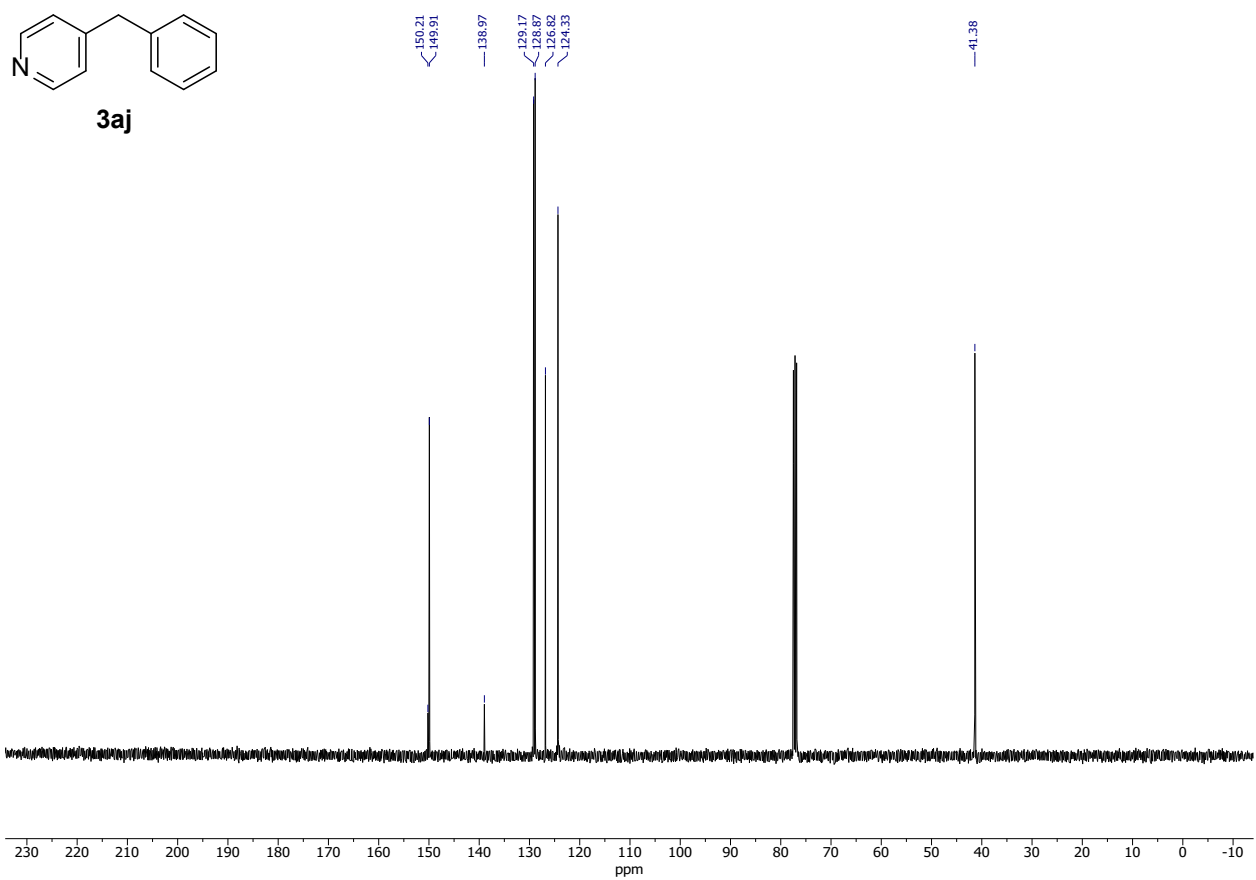



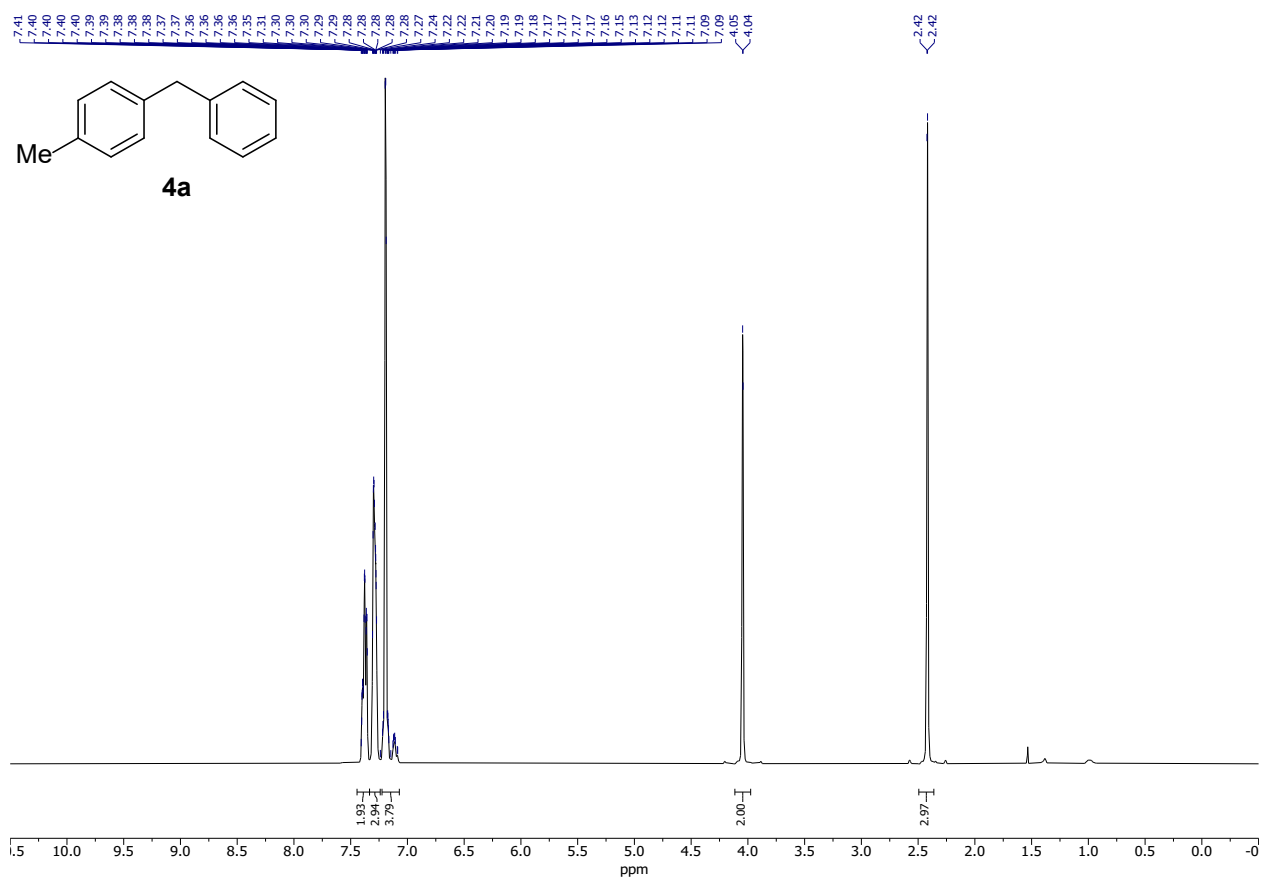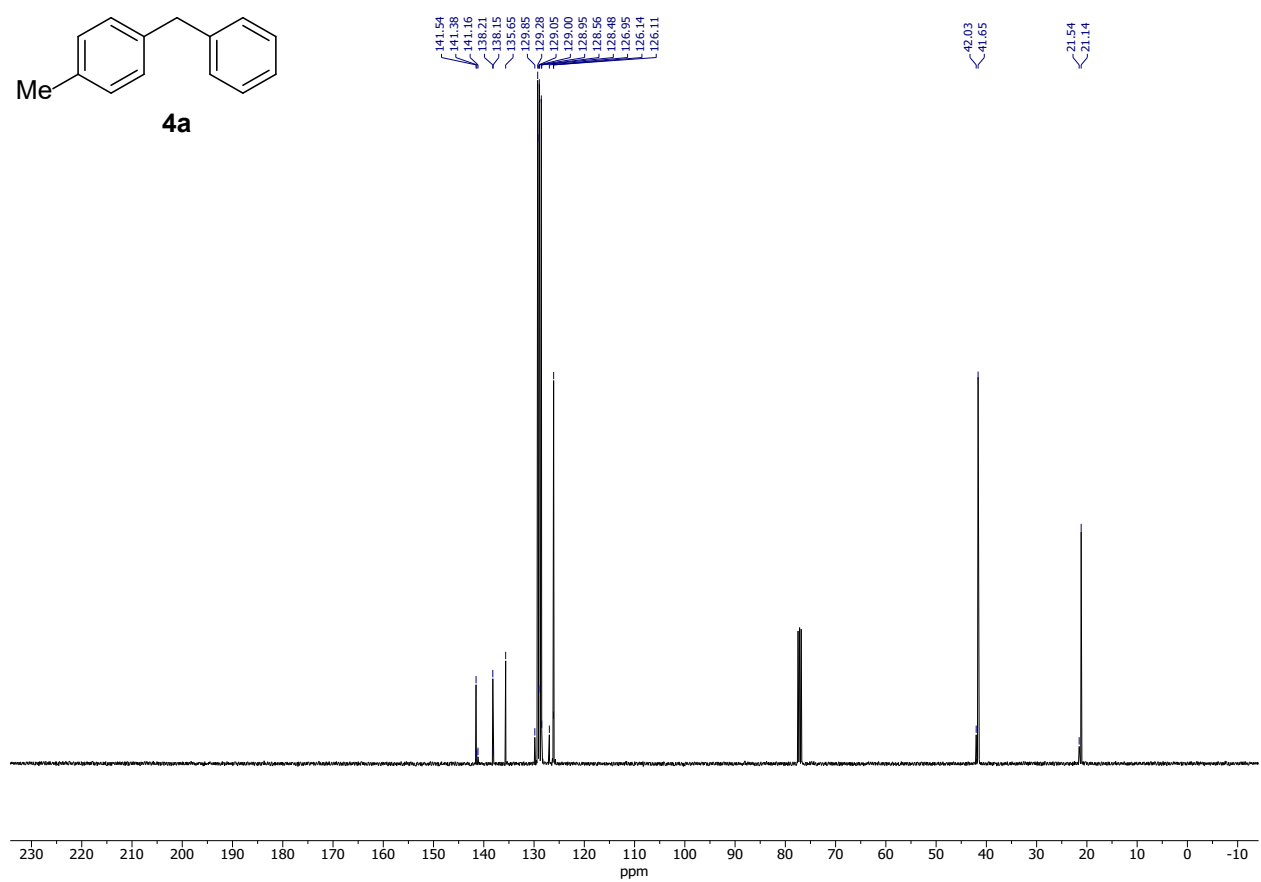

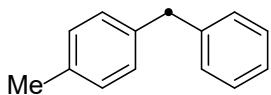

**4a**

determination of *p:m* isomer ratio  
by  $^{13}\text{C}$  NMR

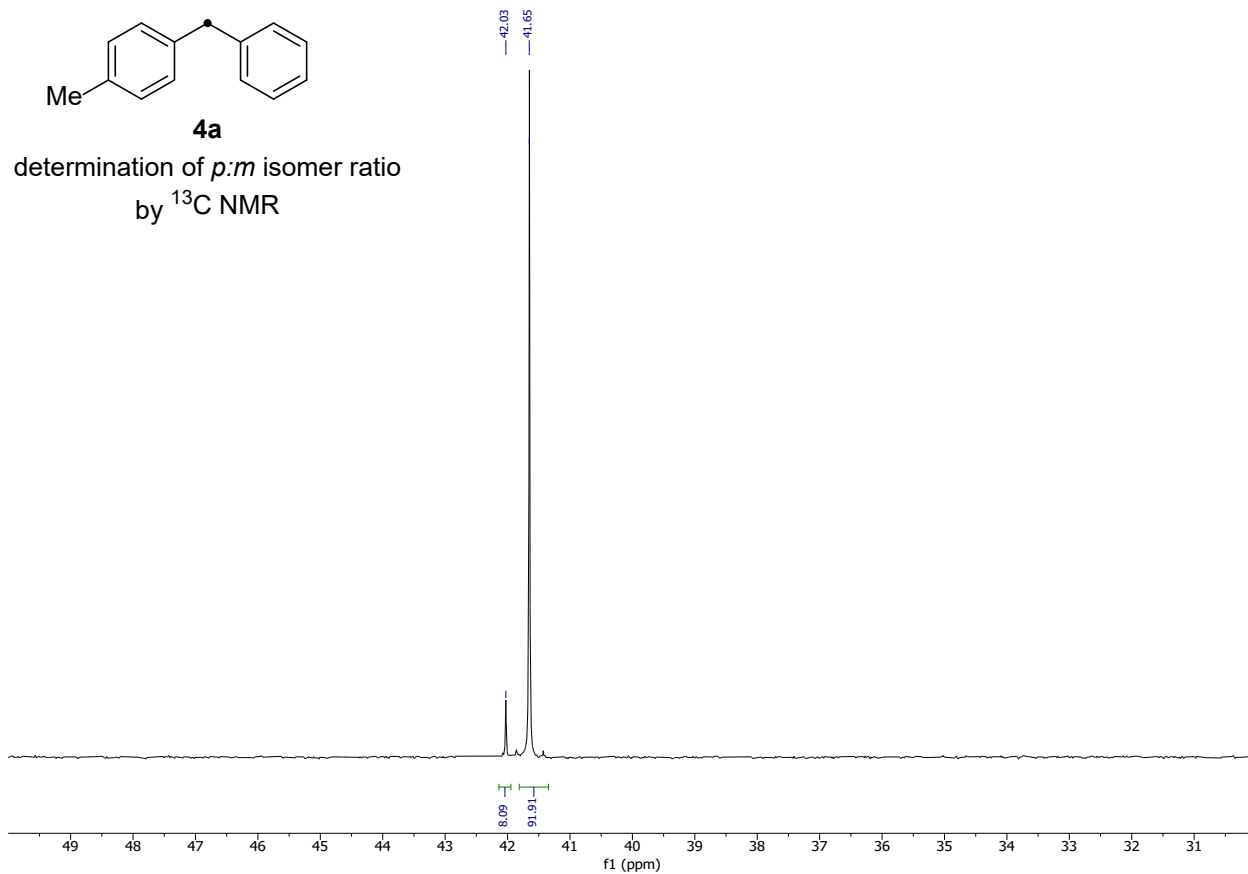

7.41  
7.40  
7.39  
7.39  
7.38  
7.38  
7.37  
7.37  
7.36  
7.35  
7.35  
7.35  
7.34  
7.34  
7.33  
7.32  
7.32  
7.31  
7.30  
7.29  
7.28  
7.28  
7.28  
7.27  
7.26  
7.26  
7.25  
7.25  
7.23  
7.22  
7.21  
7.20  
7.20  
7.19  
7.19  
7.18  
7.18  
7.17  
7.08  
7.07  
7.07  
7.06  
7.06  
4.03  
4.04

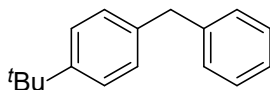

**4b**

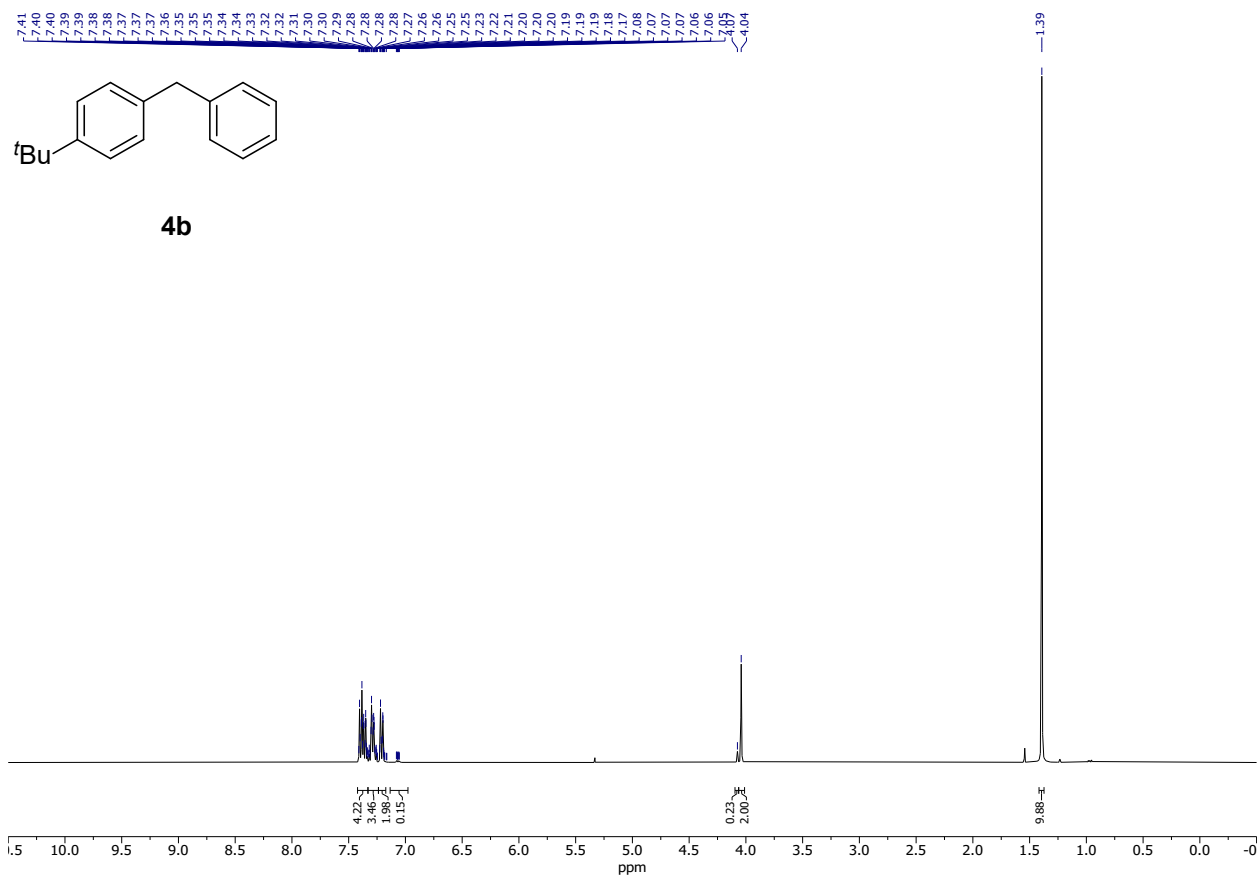

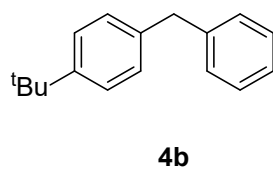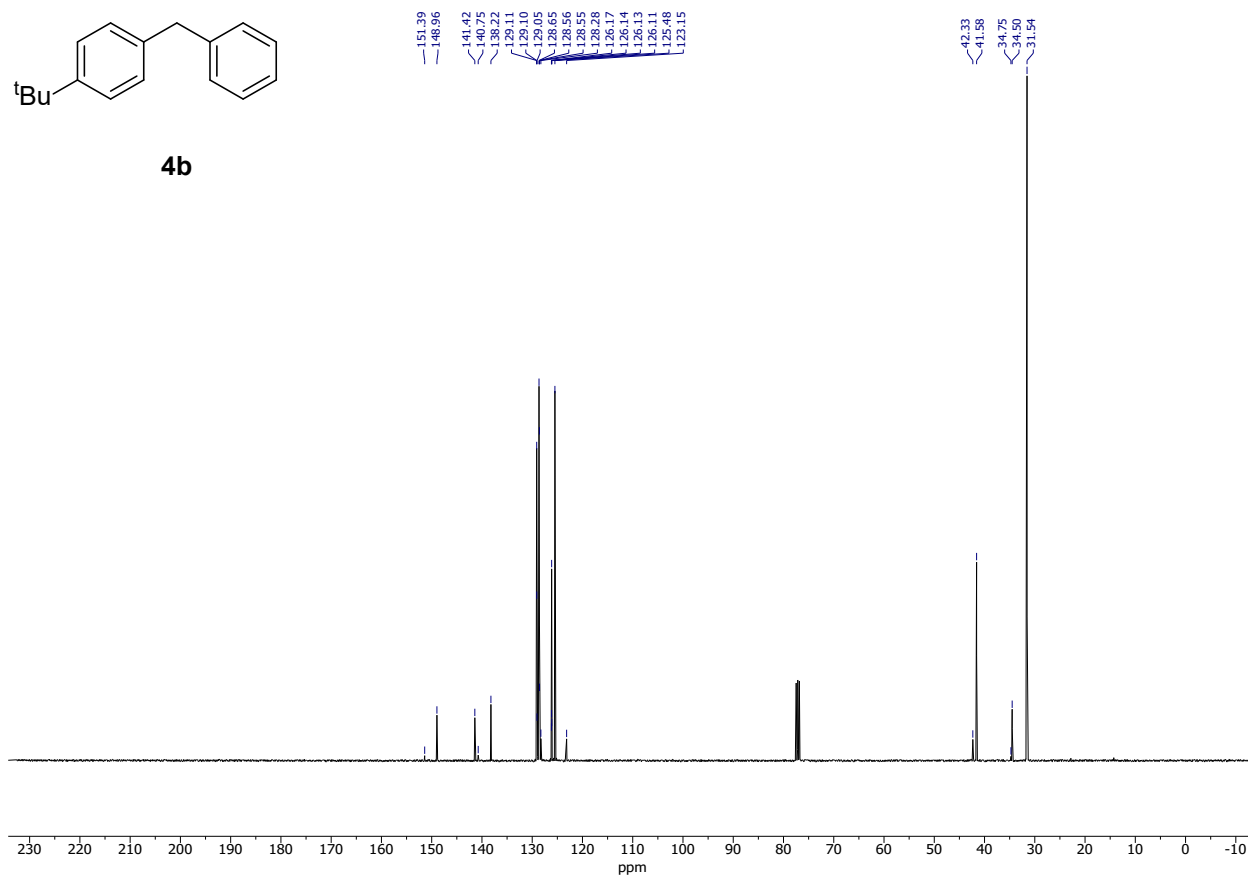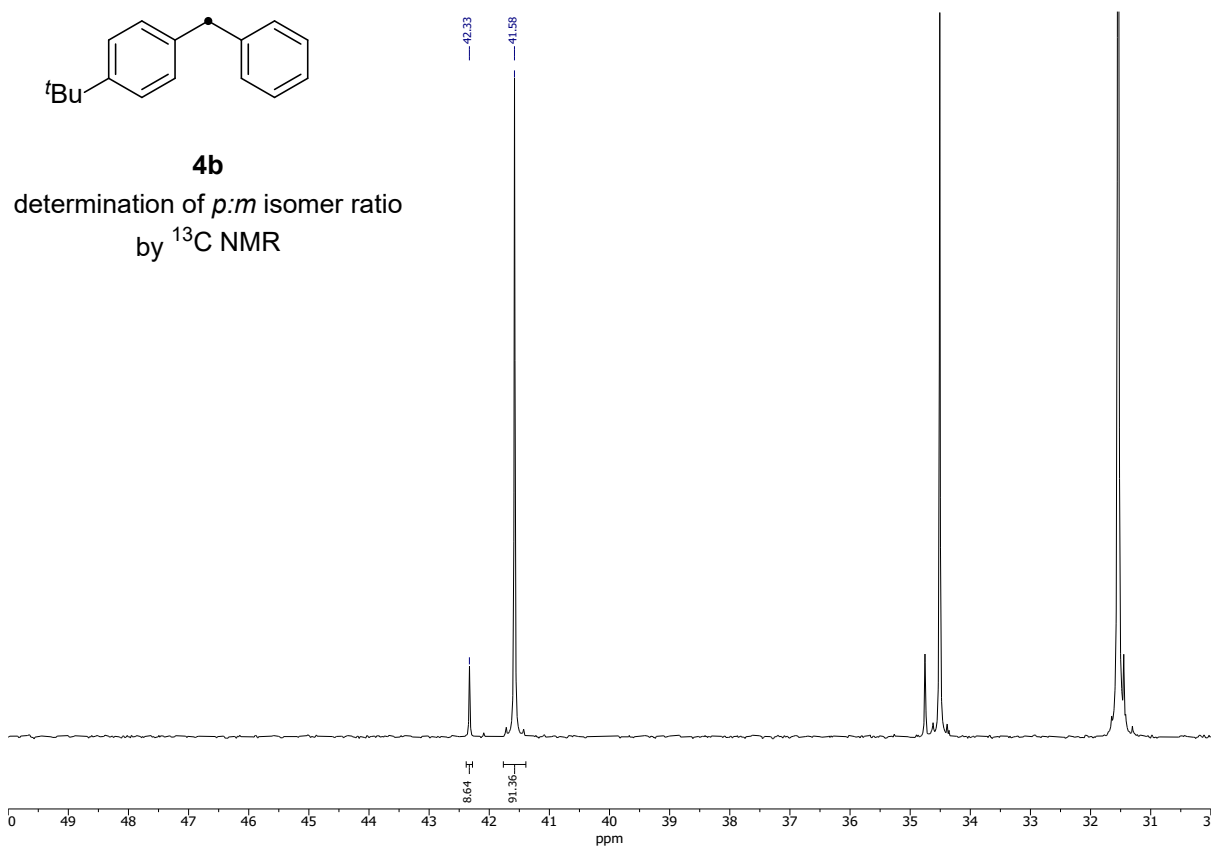

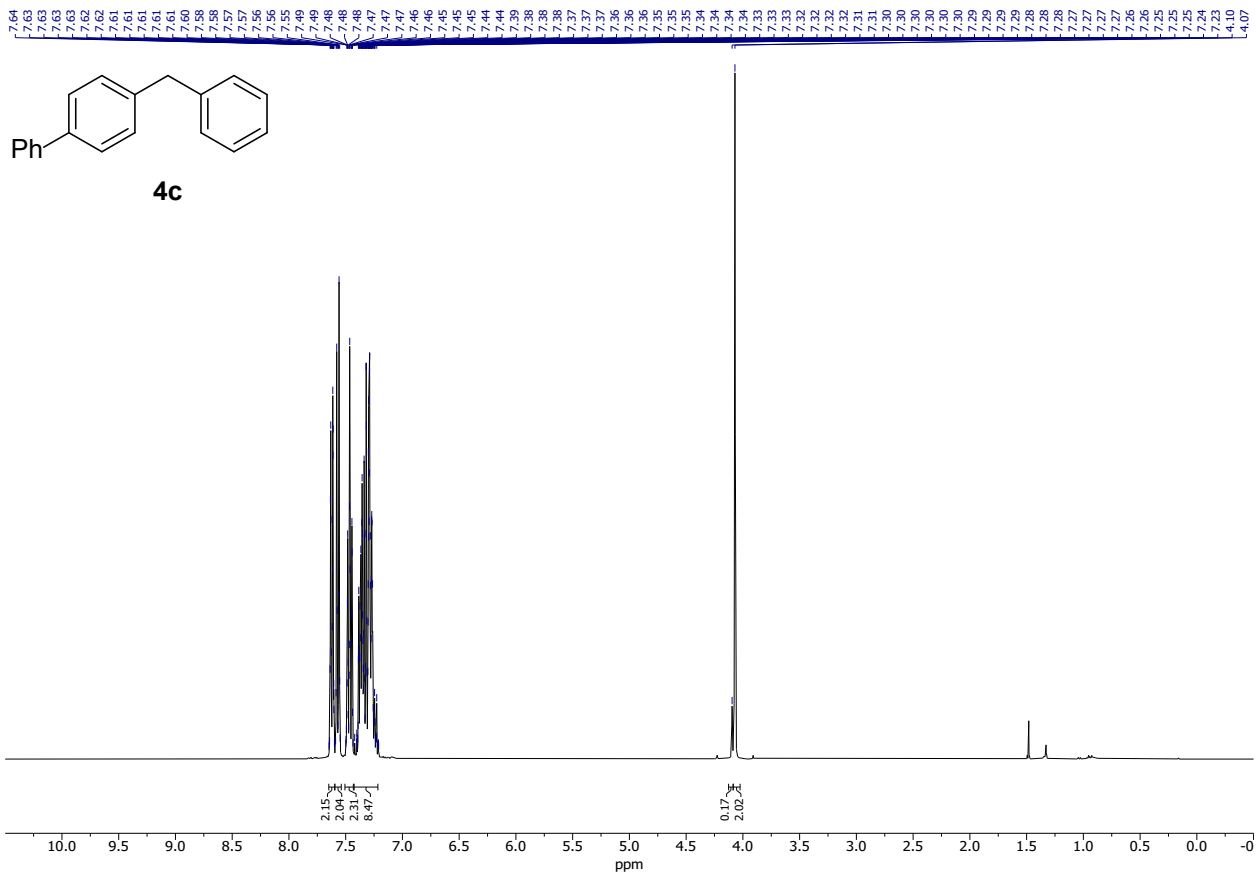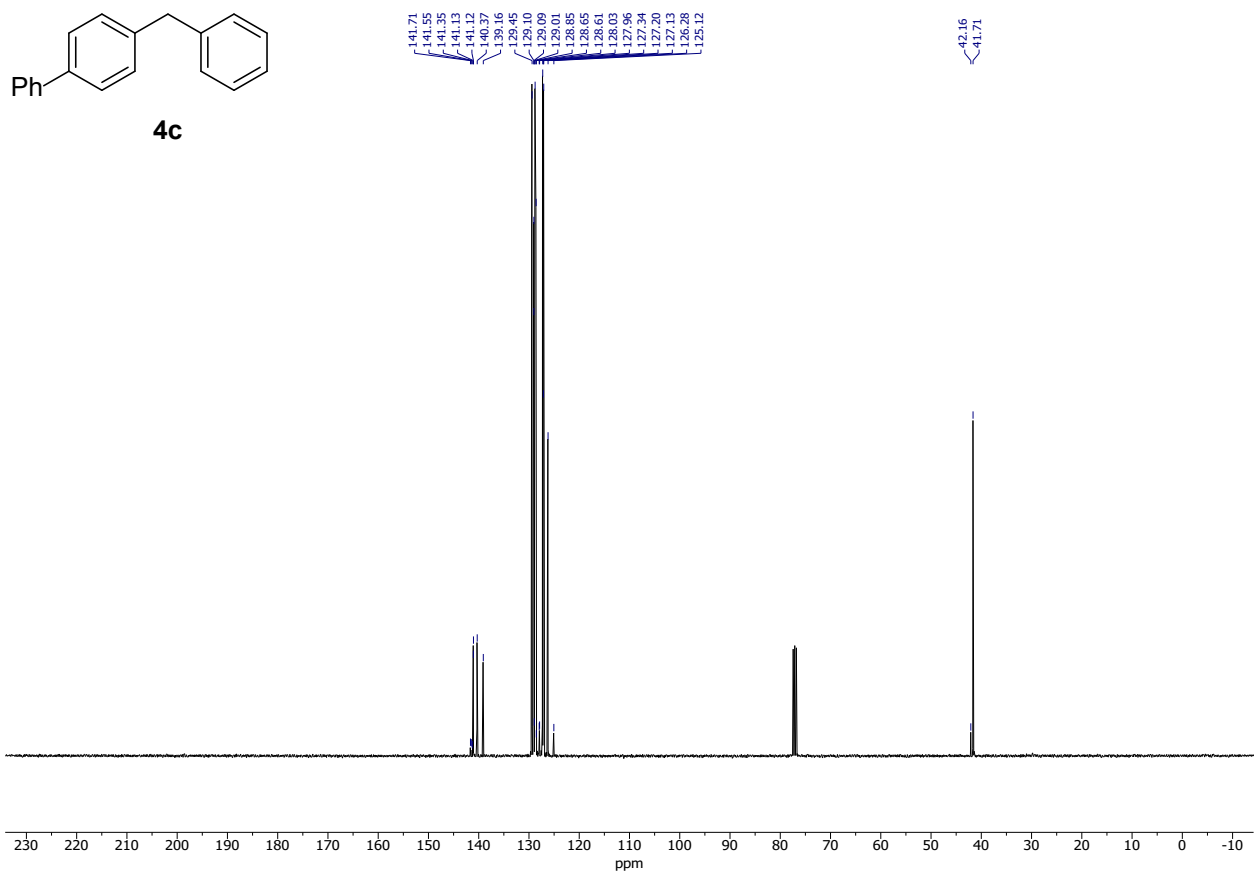

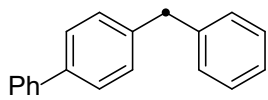

**4c**

determination of *p:m* isomer ratio  
by  $^{13}\text{C}$  NMR

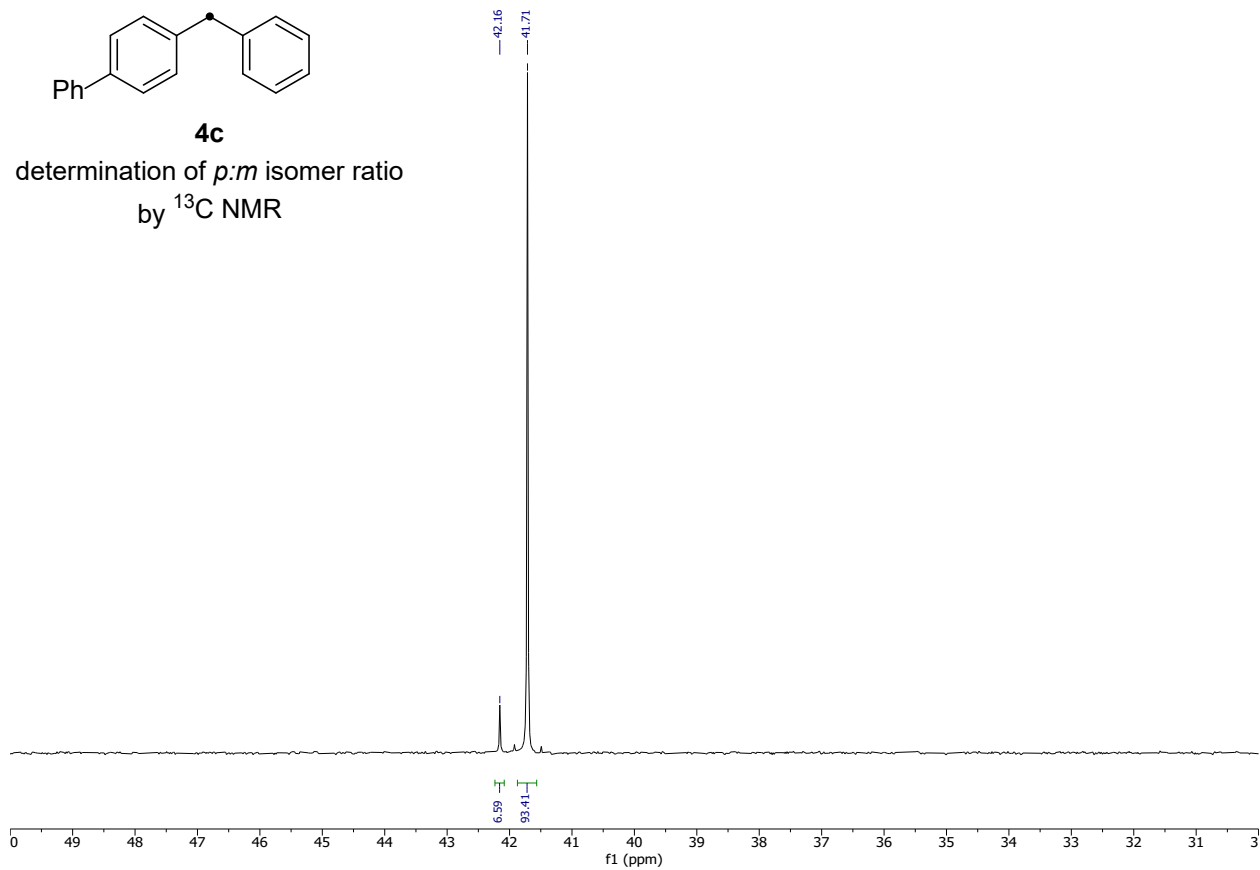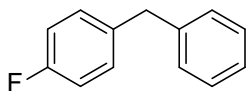

**4d**

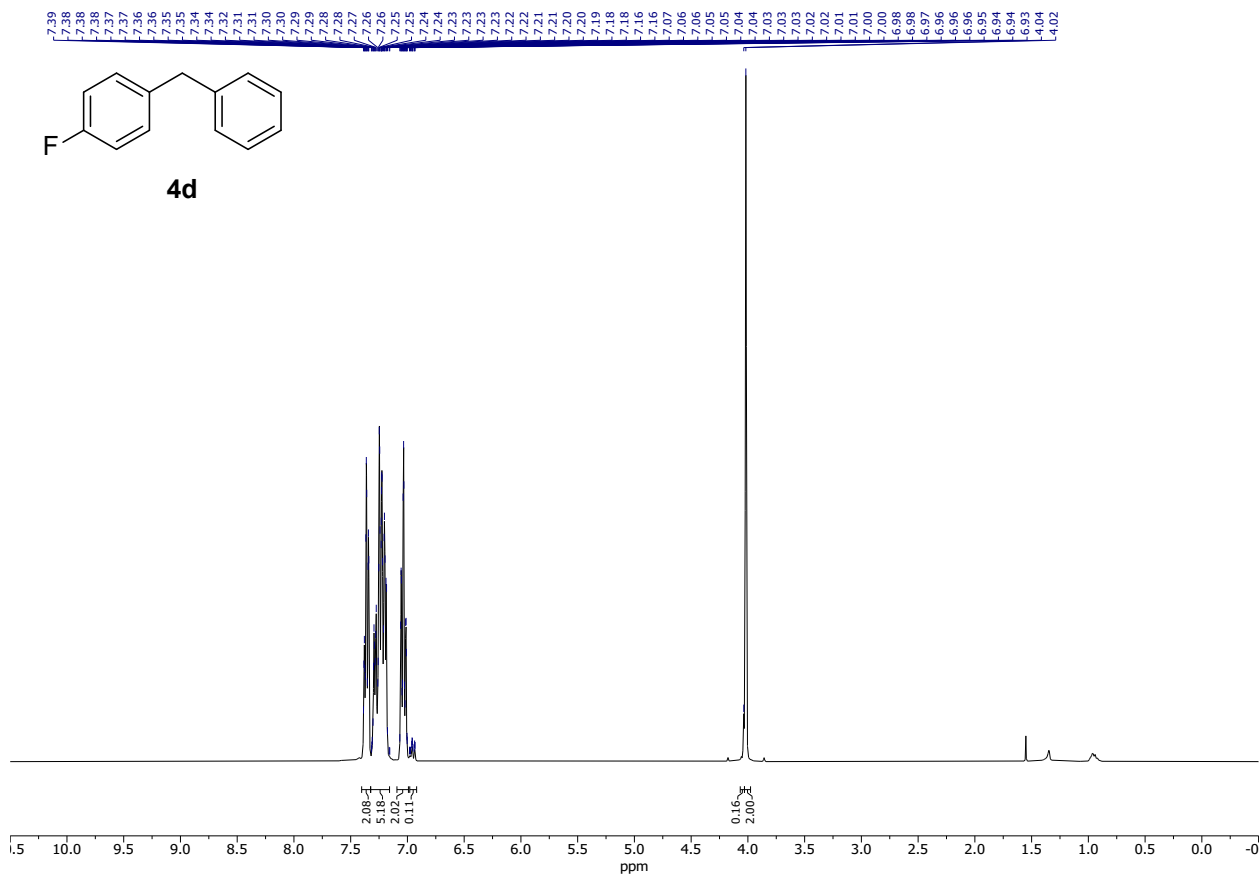

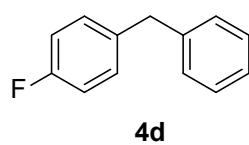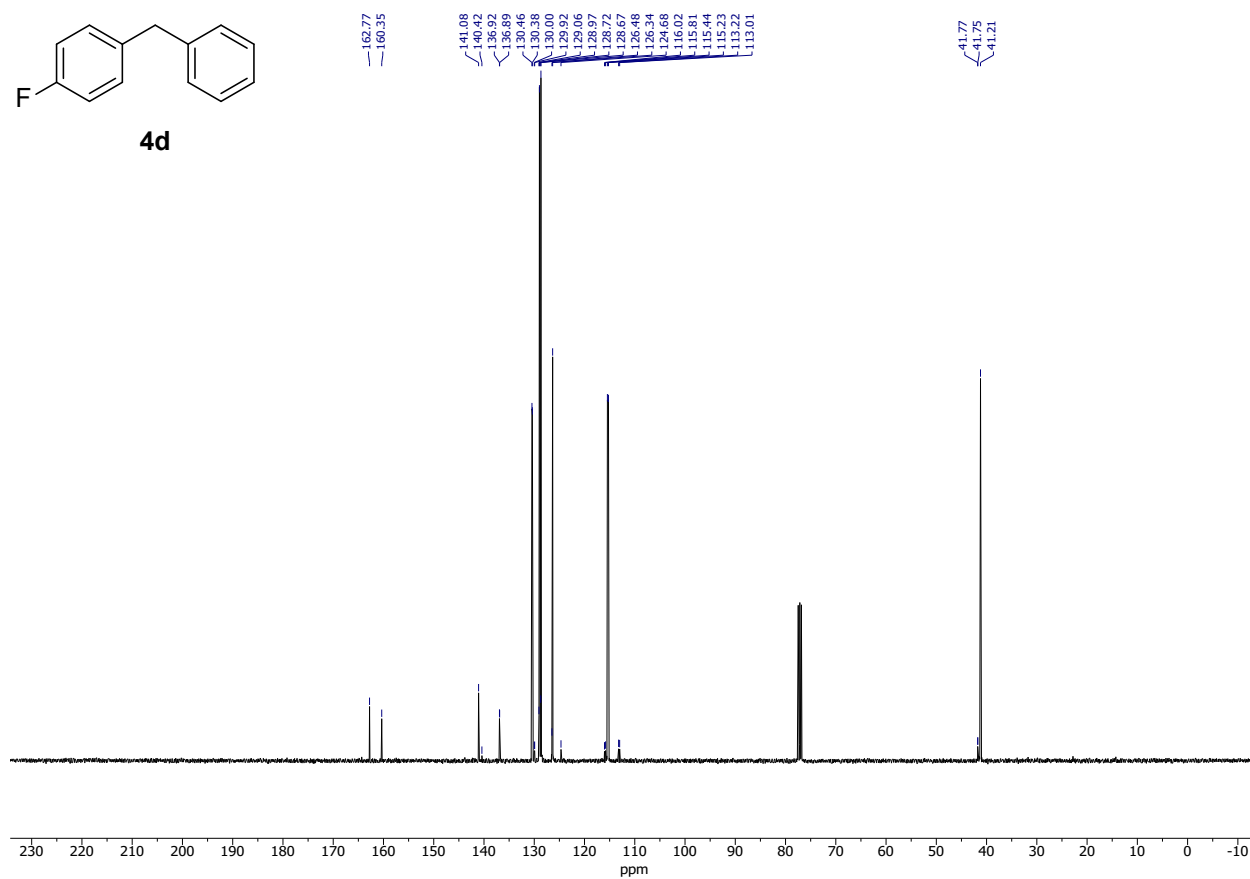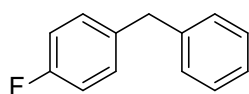

**4d**

determination of *p:m* isomer ratio  
by  $^{19}\text{F}$  NMR

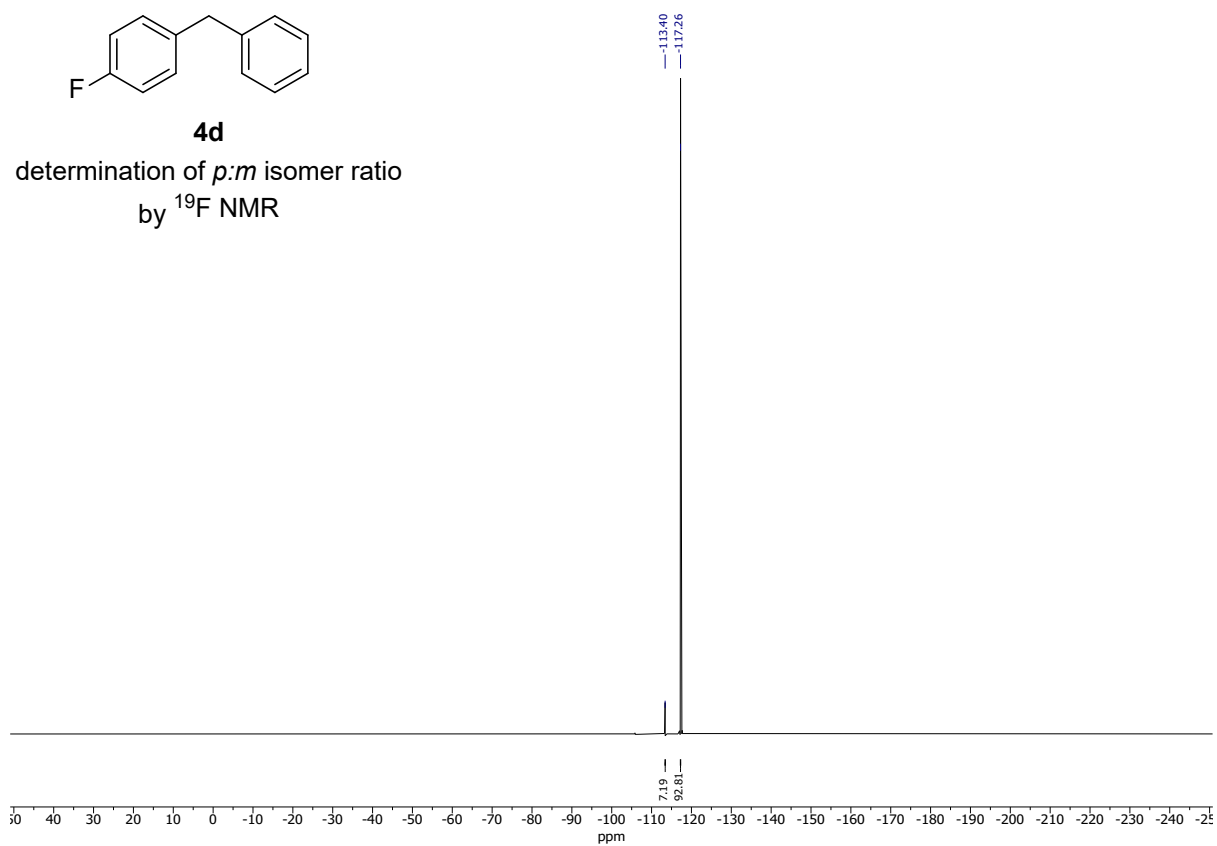

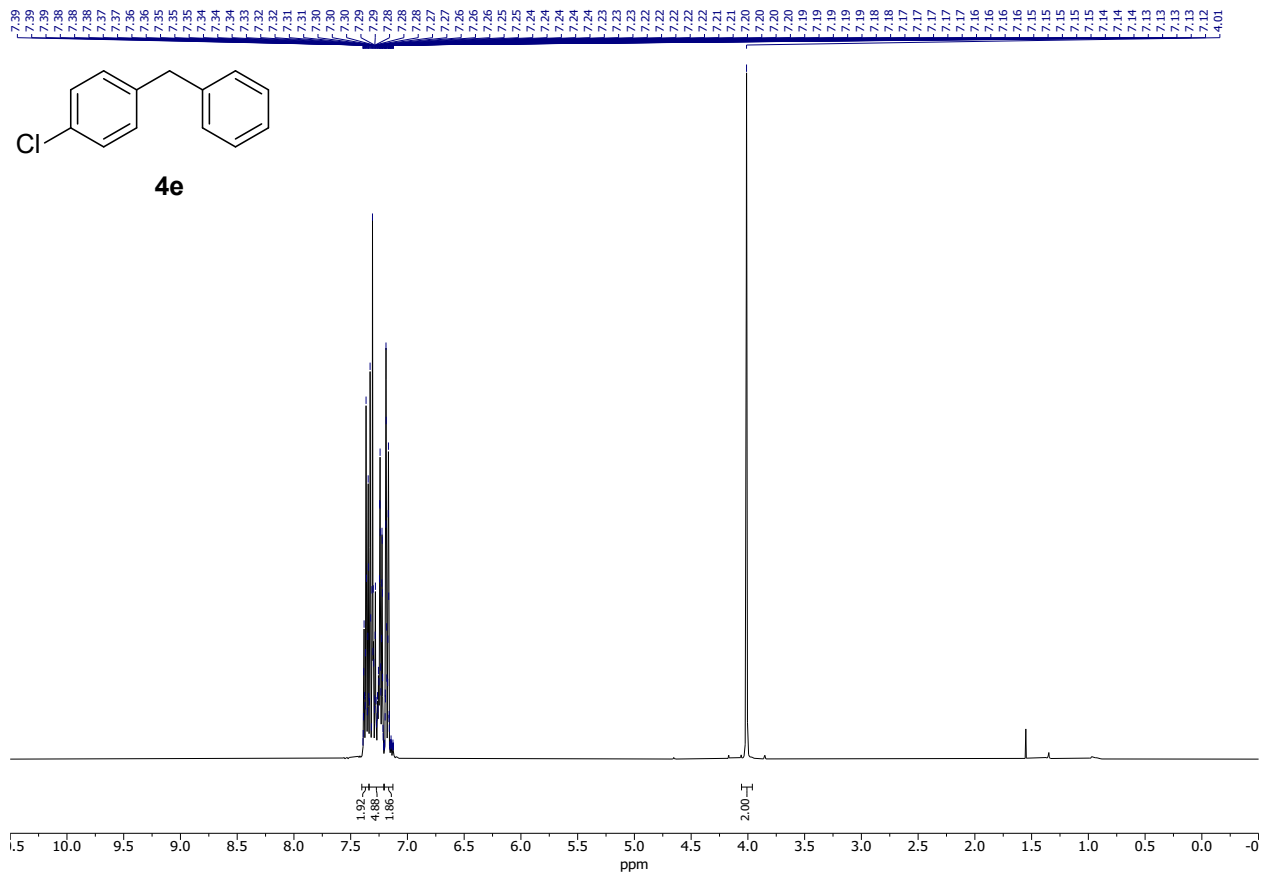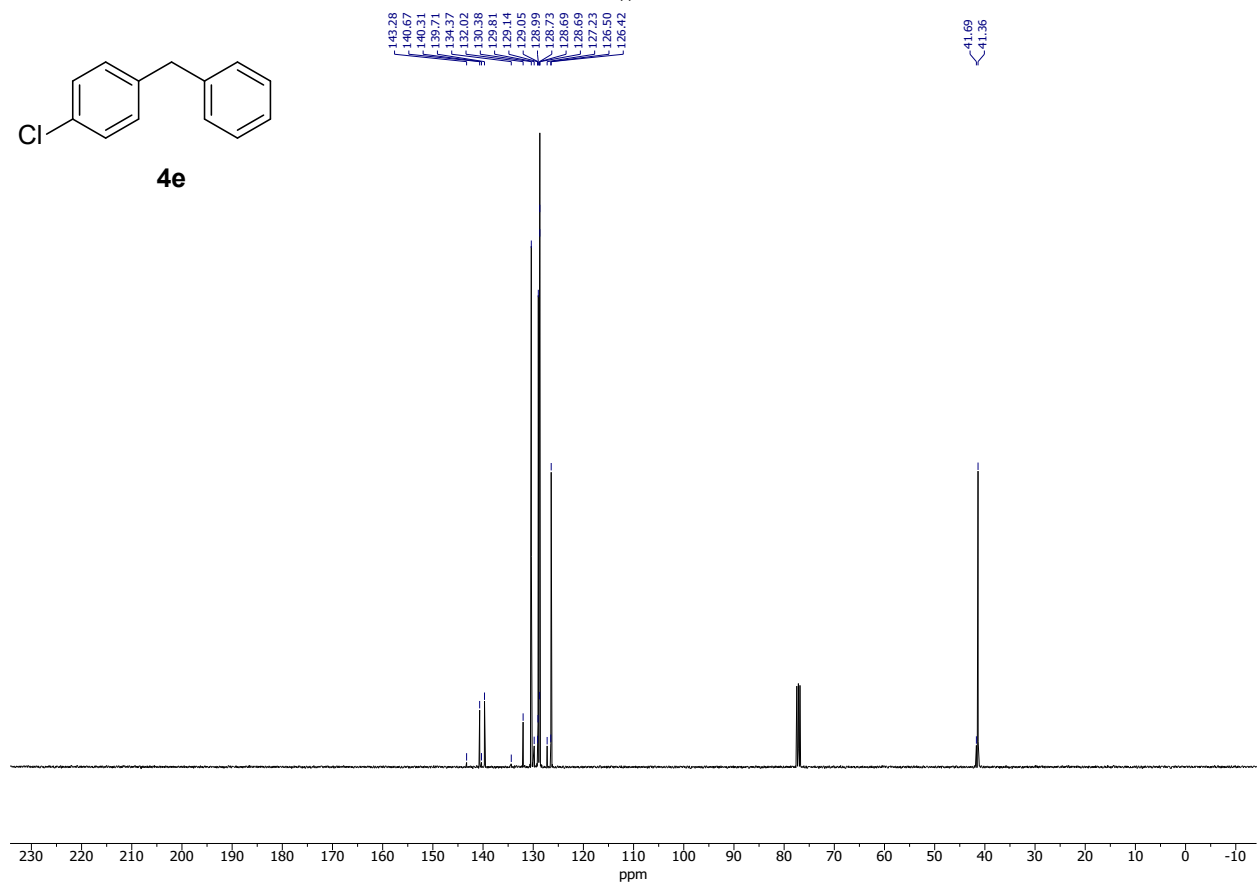

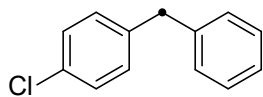

**4e**

determination of *p:m* isomer ratio  
by  $^{13}\text{C}$  NMR

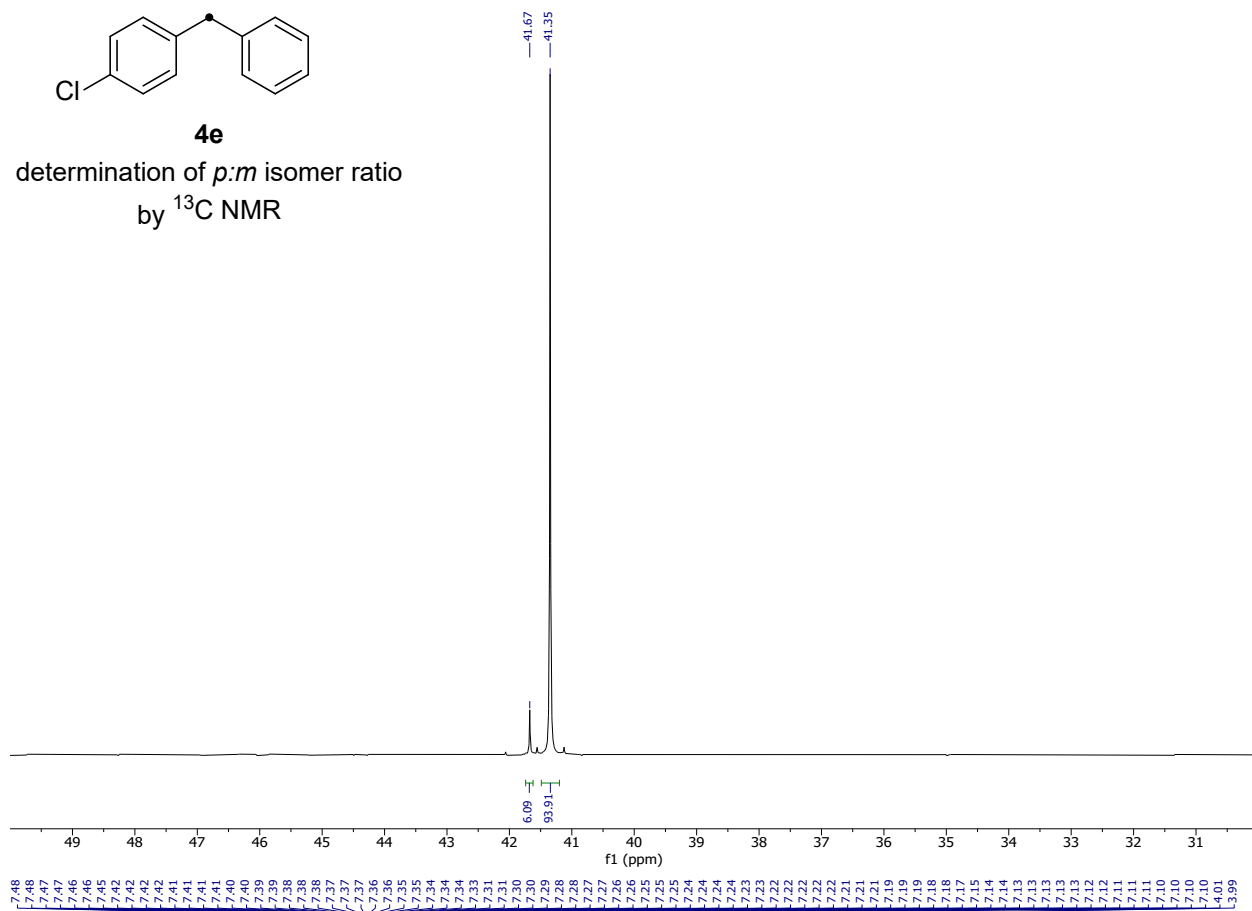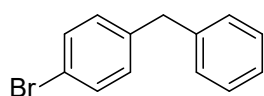

**4f**

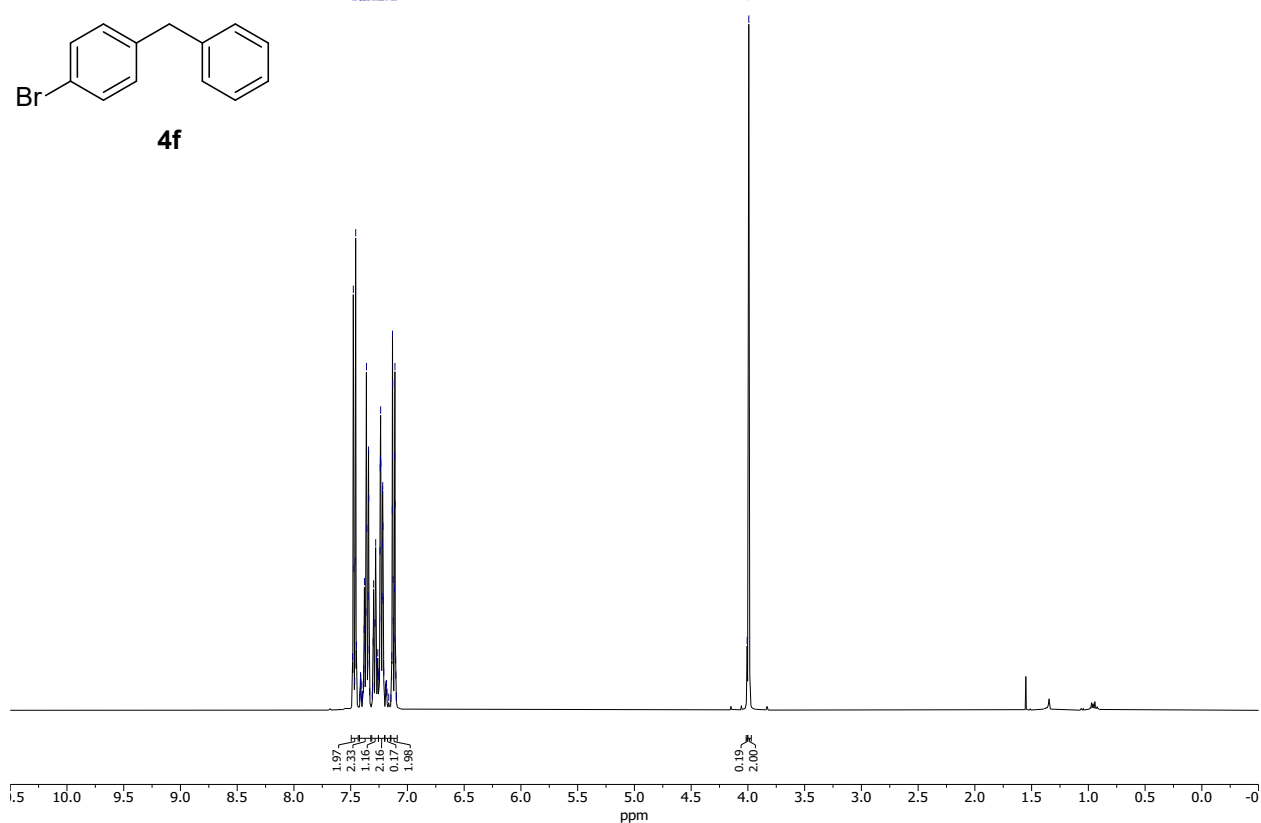



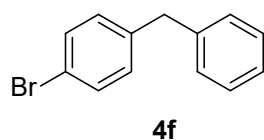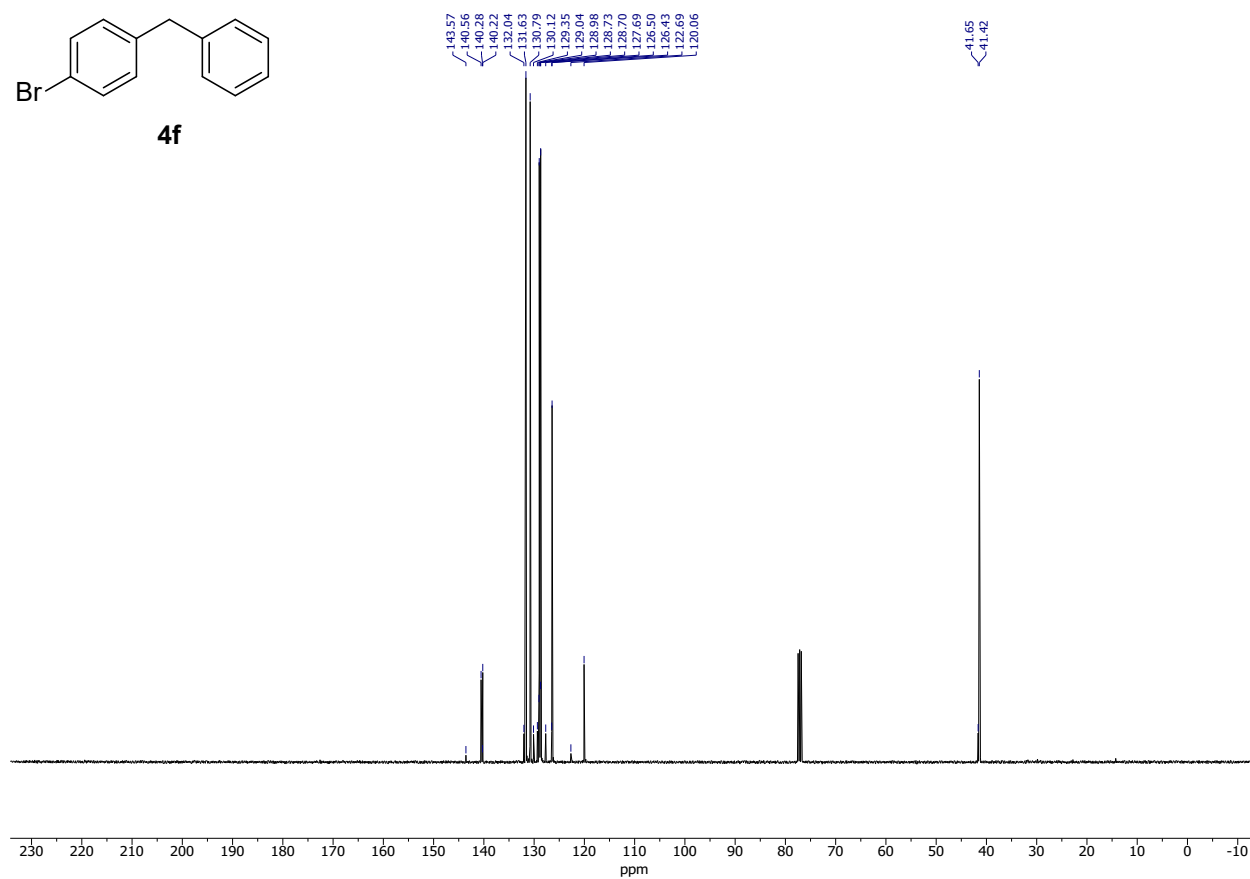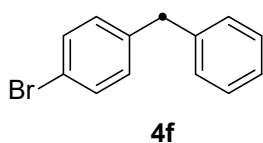

determination of *p:m* isomer ratio  
by  $^{13}\text{C}$  NMR

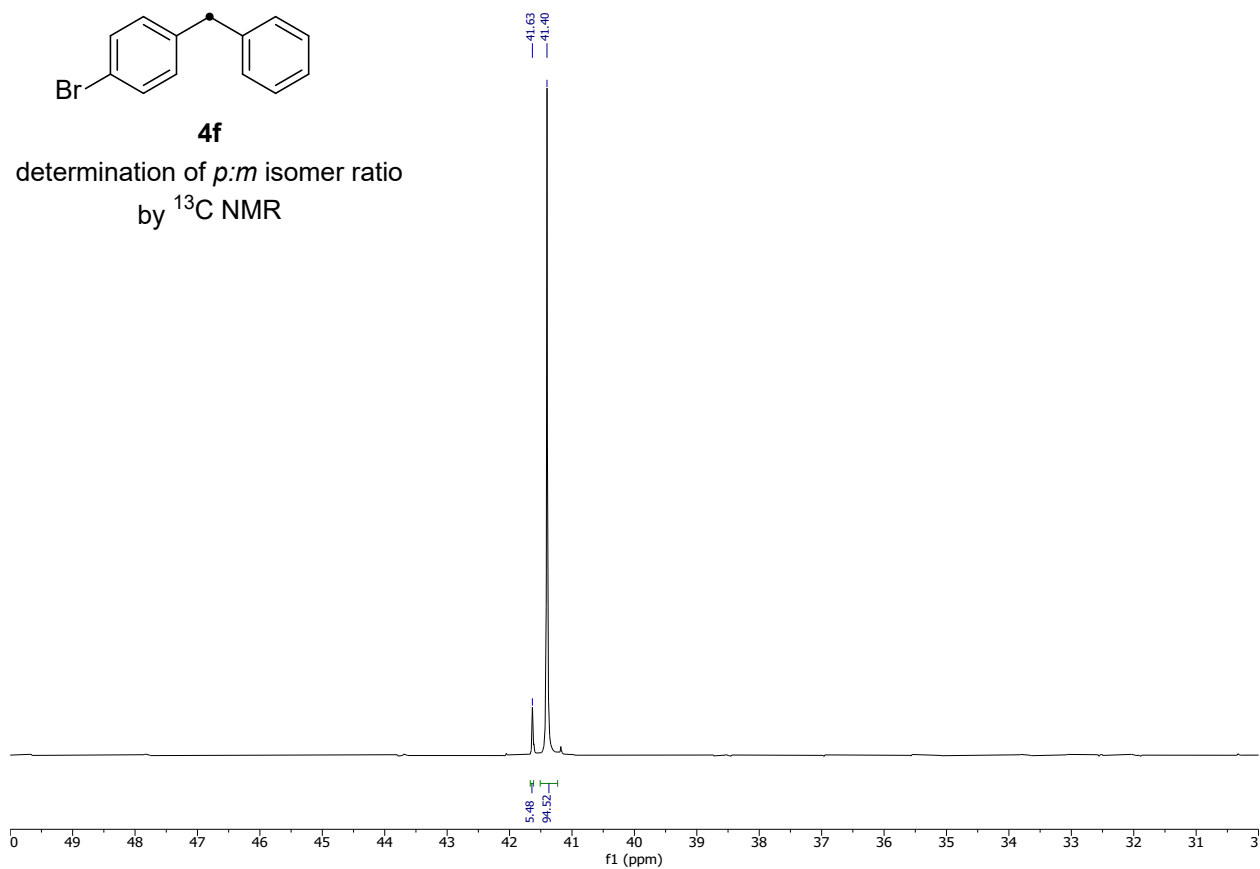

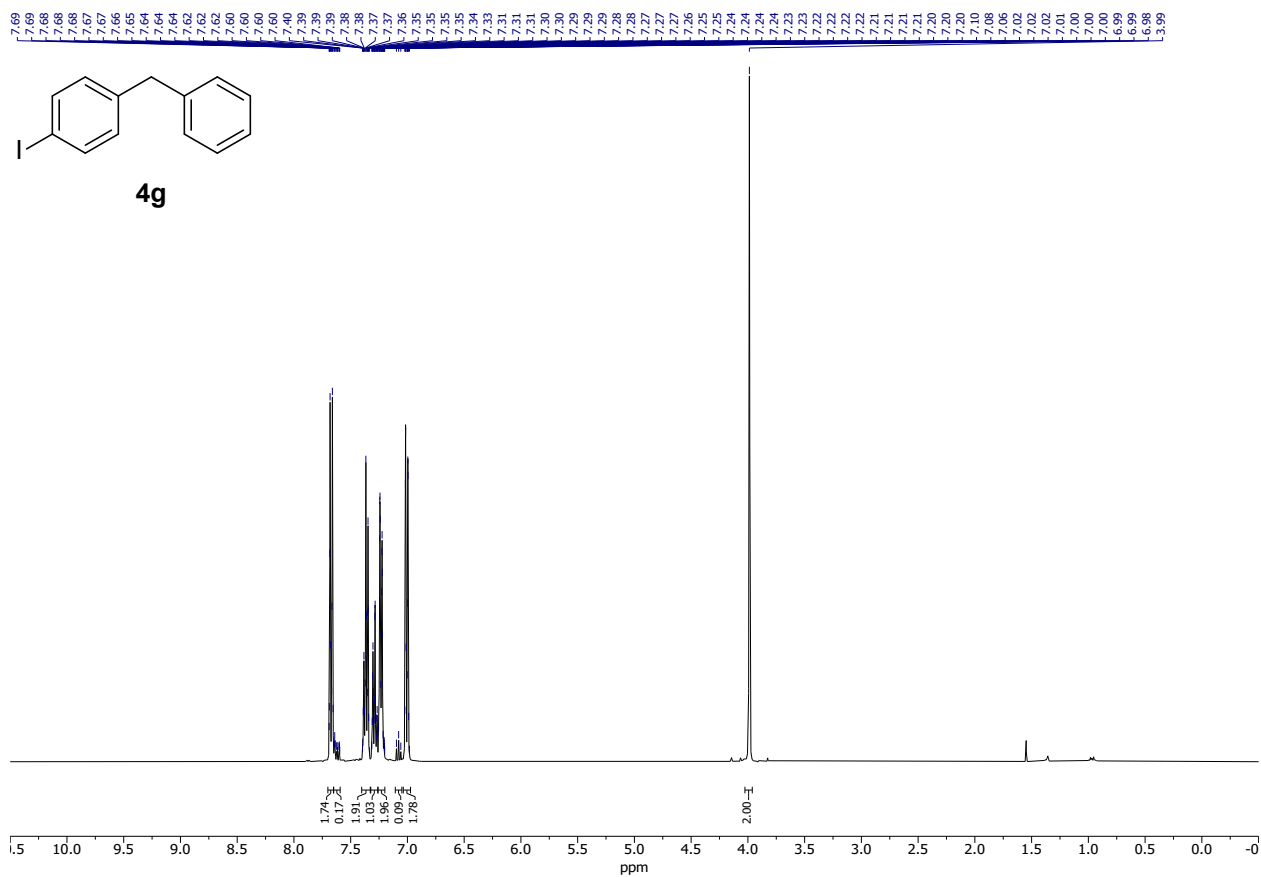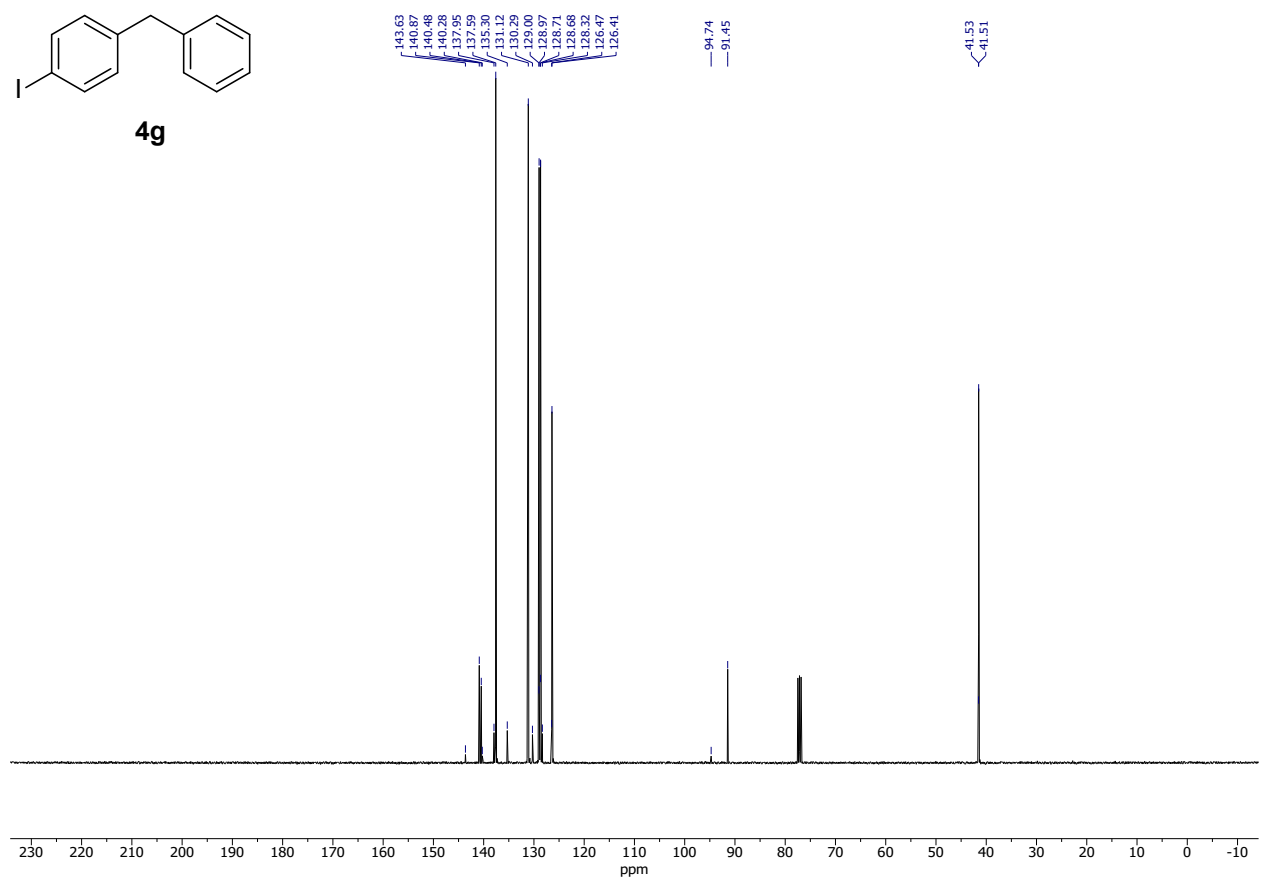

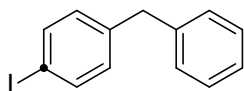

**4g**

determination of *p:m* isomer ratio  
by  $^{13}\text{C}$  NMR

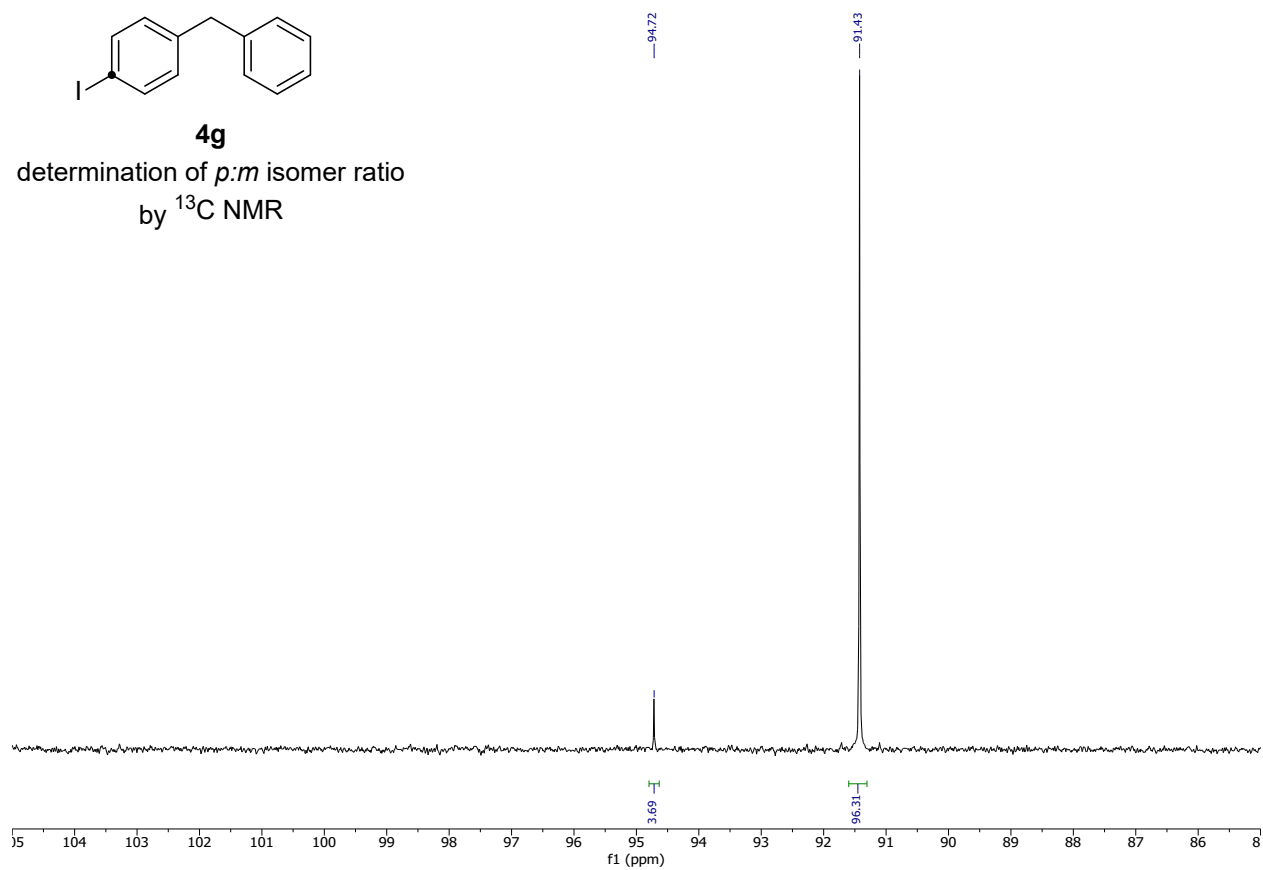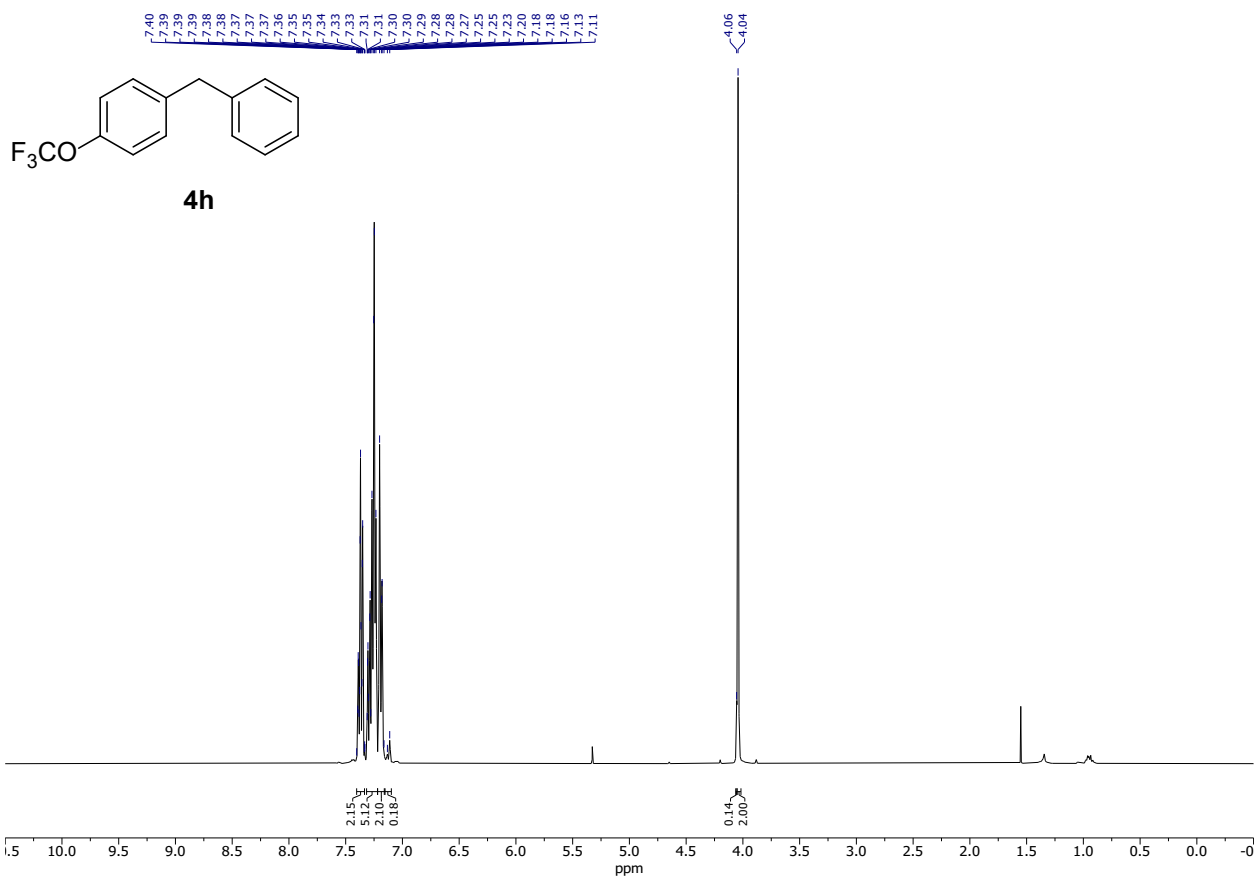

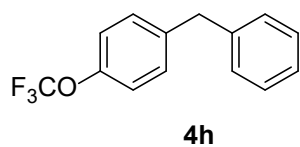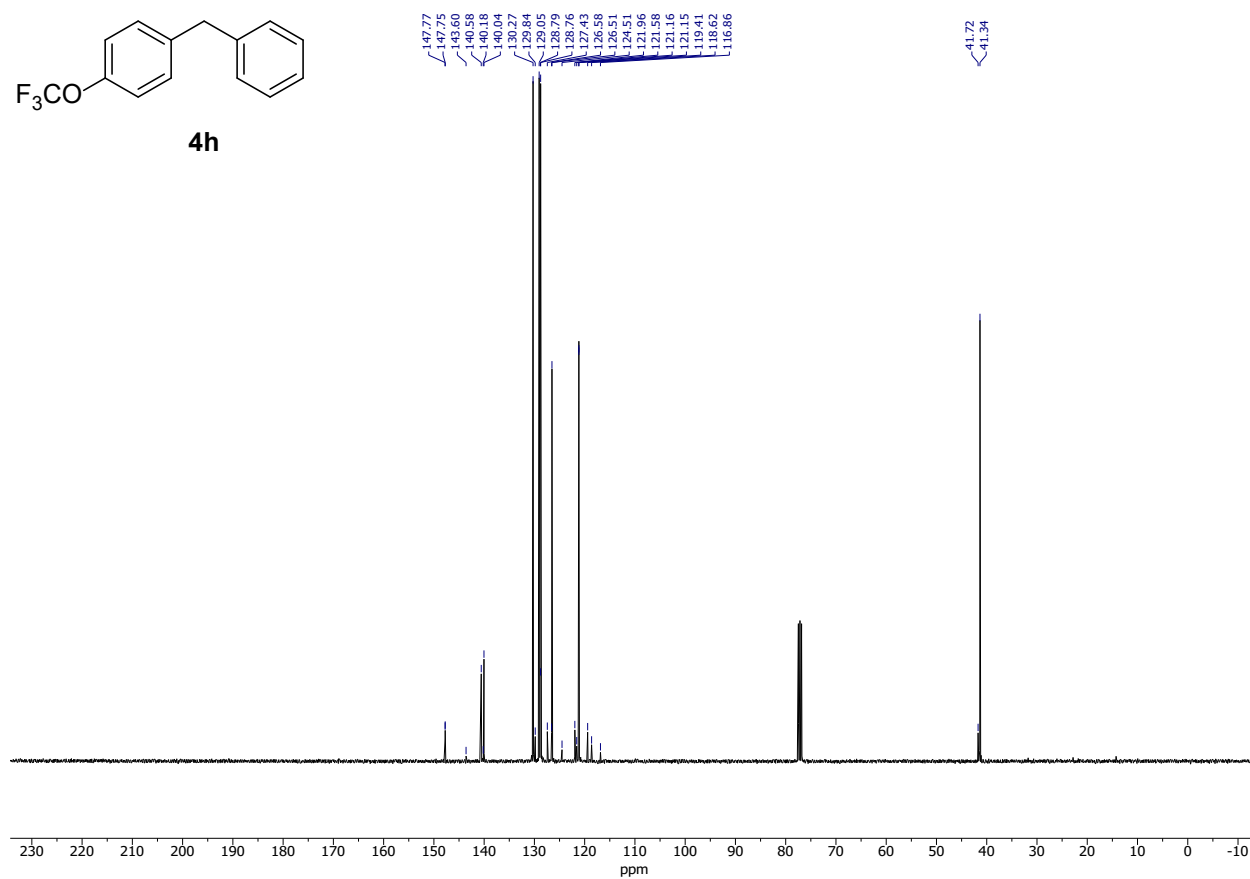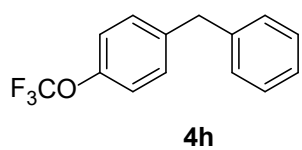

determination of *p:m* isomer ratio  
by  $^{19}\text{F}$  NMR

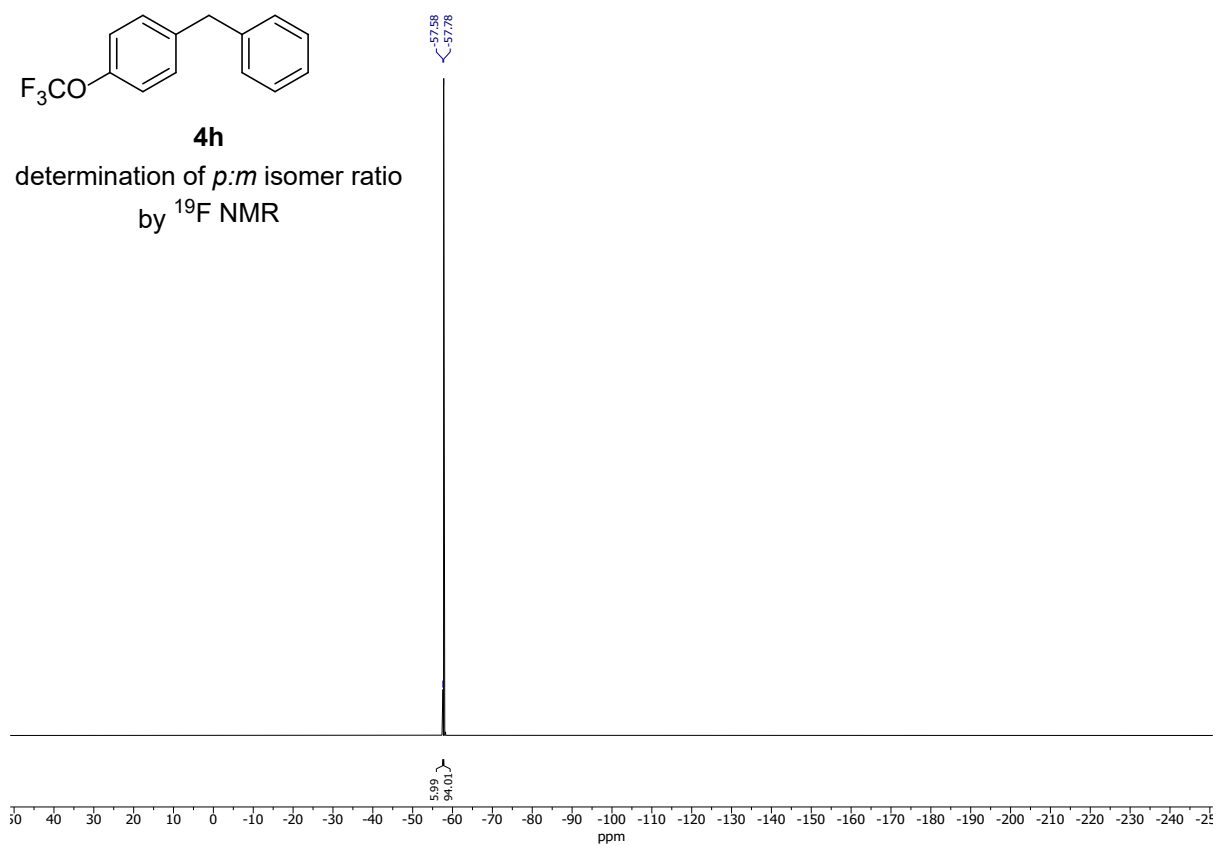



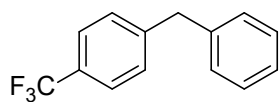

**4i**

determination of *p:m* isomer ratio  
by  $^{19}\text{F}$  NMR

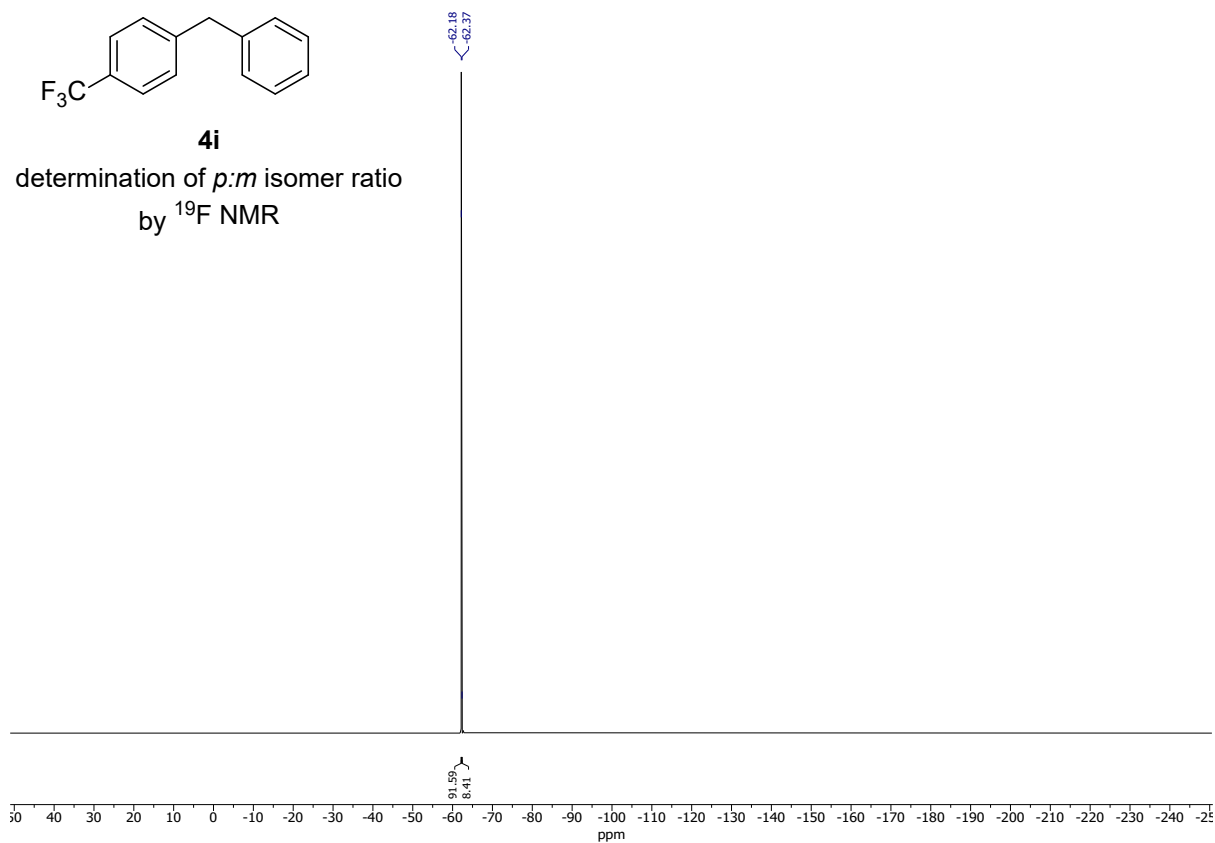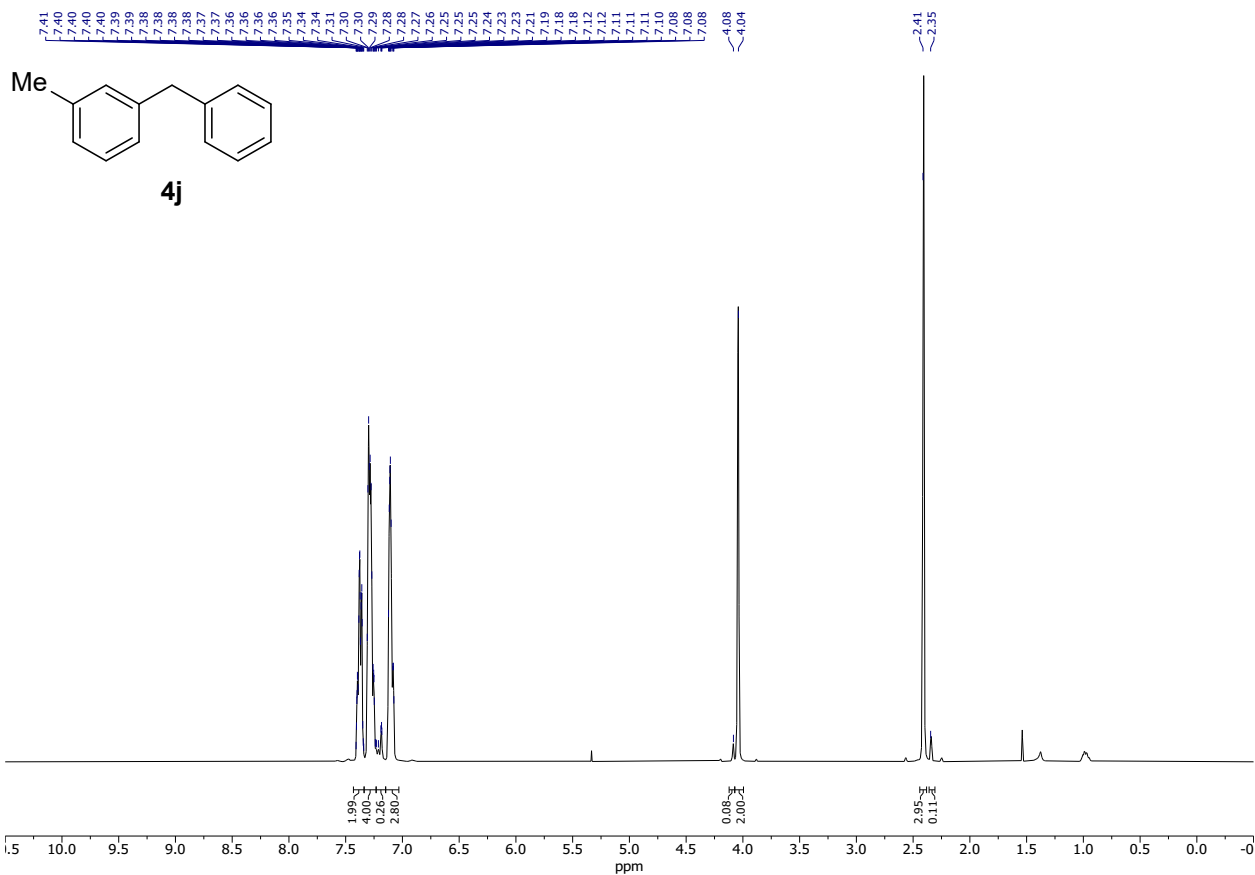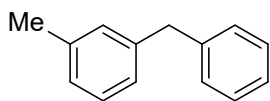

**4j**

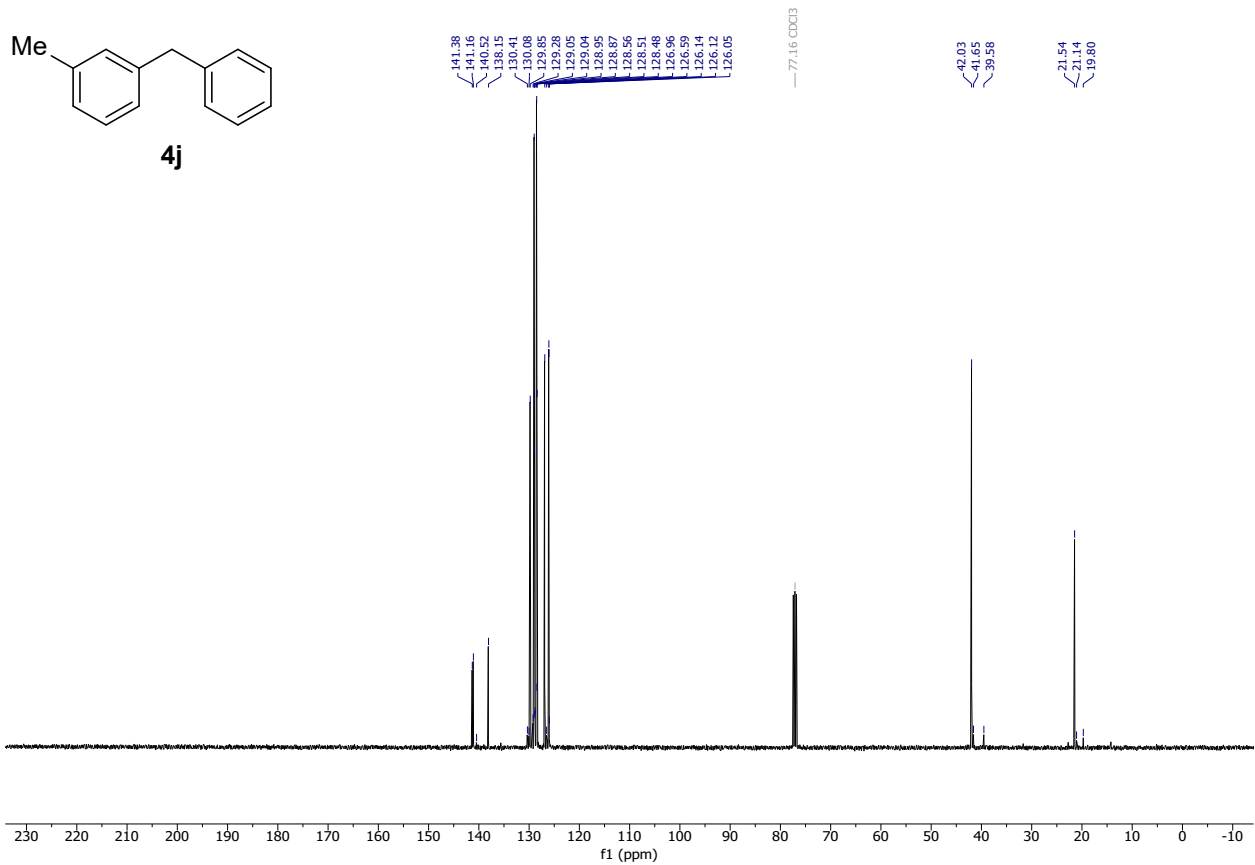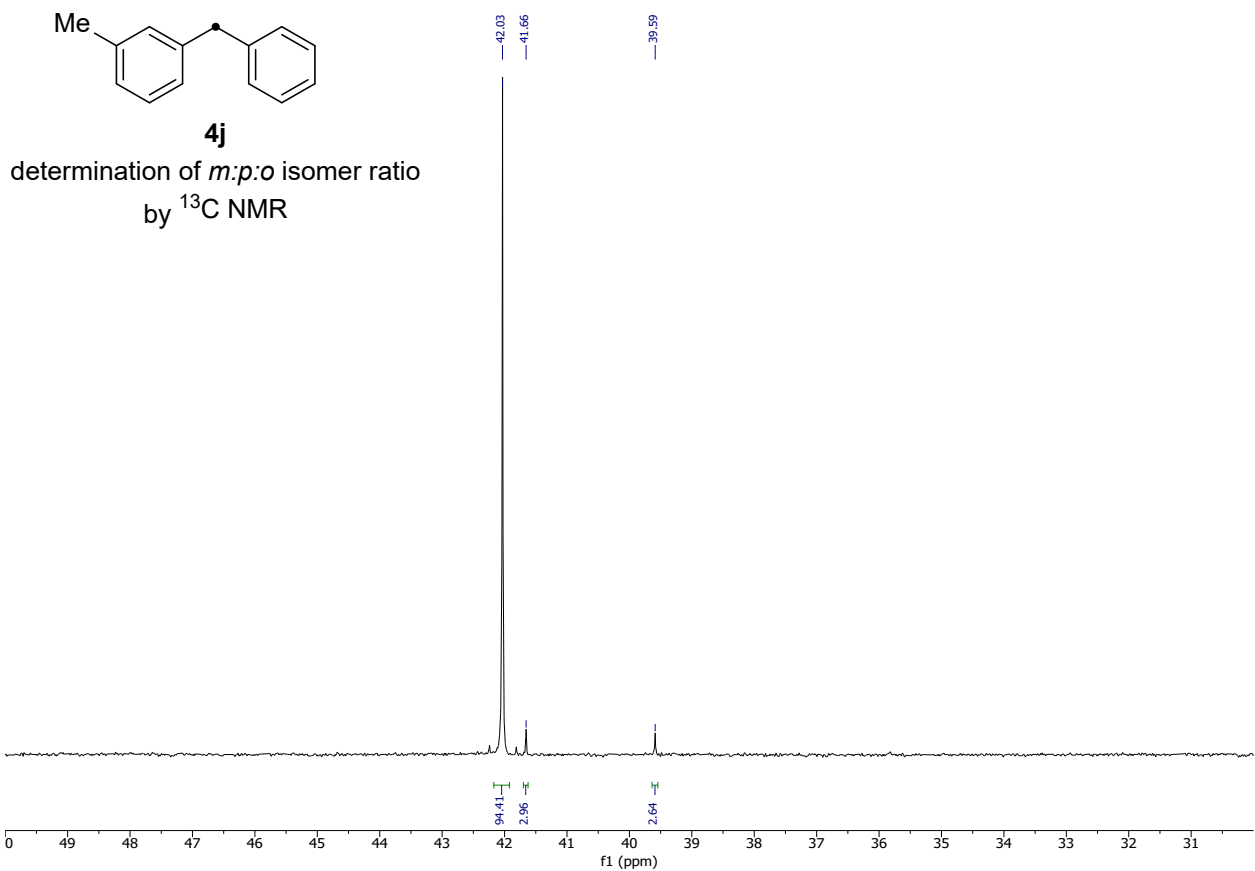

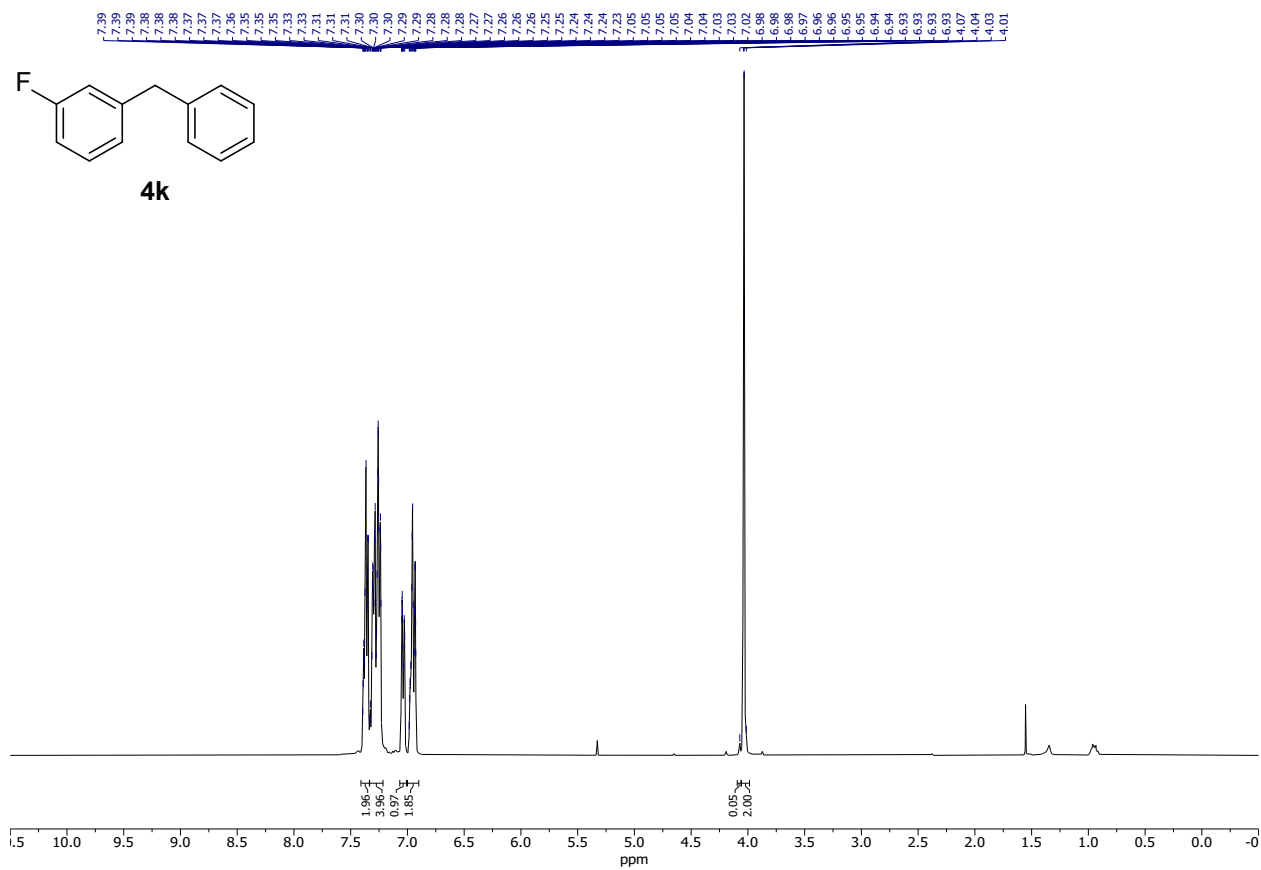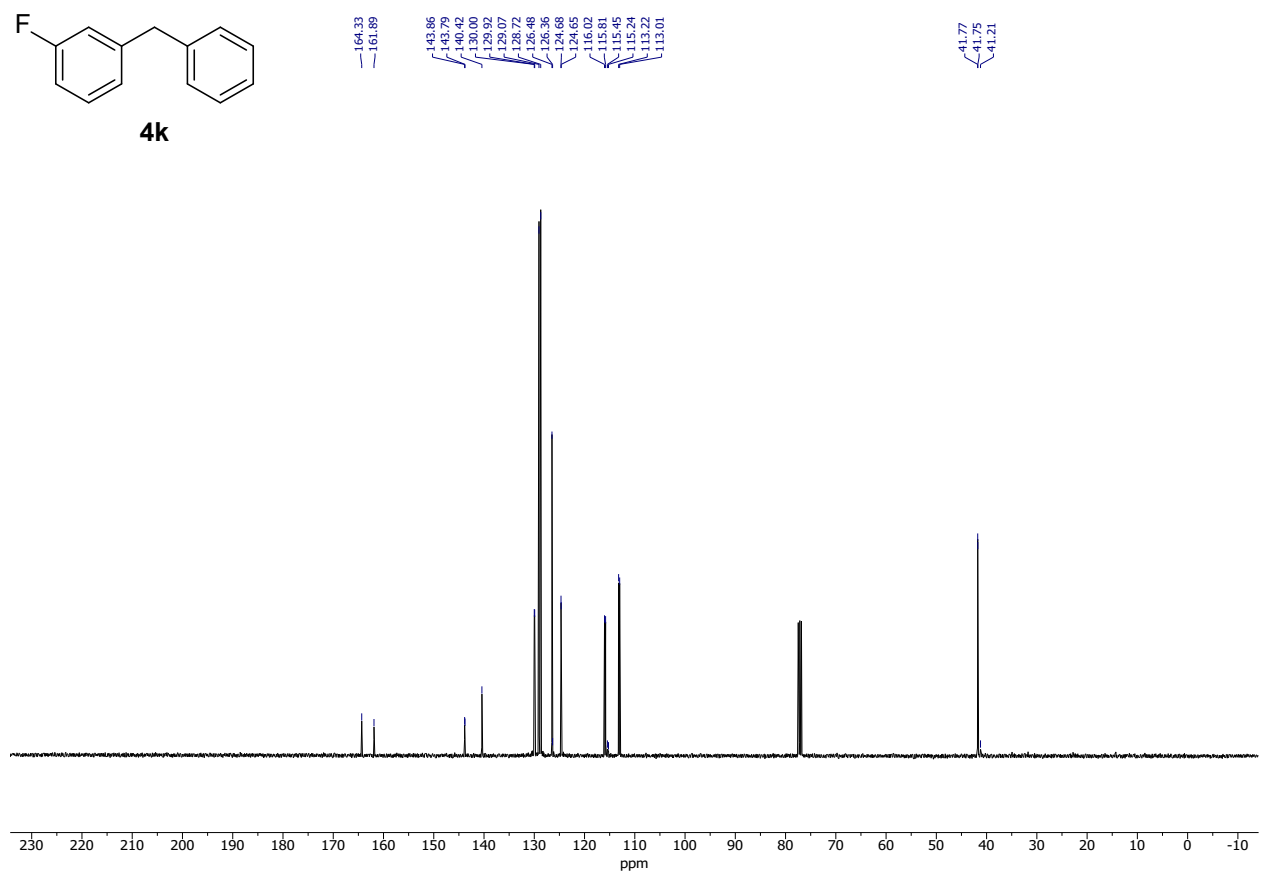



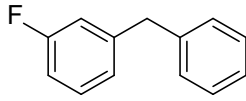

**4k**

determination of *m:p:o* ratio  
by <sup>19</sup>F NMR

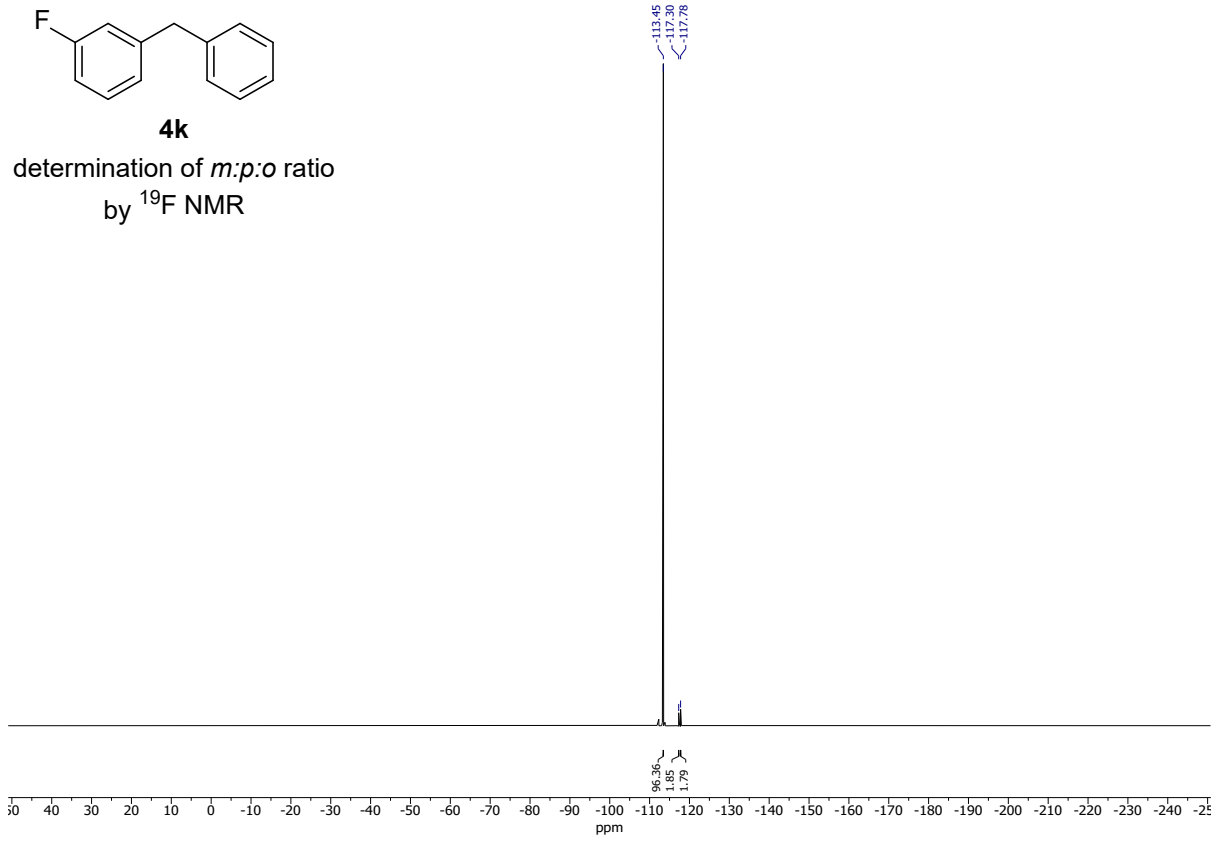

7.48  
7.47  
7.47  
7.46  
7.46  
7.45  
7.45  
7.44  
7.44  
7.43  
7.43  
7.40  
7.39  
7.39  
7.38  
7.38  
7.37  
7.36  
7.36  
7.34  
7.33  
7.32  
7.32  
7.31  
7.31  
7.30  
7.29  
7.28  
7.28  
7.28  
7.27  
7.26  
7.26  
7.25  
7.25  
7.24  
7.24  
7.24  
7.23  
7.23  
7.22  
7.21  
7.21  
7.20  
7.20  
7.19  
7.18  
7.18  
7.17  
7.16  
7.15  
7.15  
7.14  
7.14  
7.14  
7.13  
7.13  
7.12  
7.12  
7.11  
7.11  
7.11  
7.10  
7.10  
7.09  
7.07  
7.06  
7.05  
7.05  
7.03  
7.02

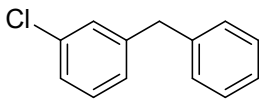

**4l**

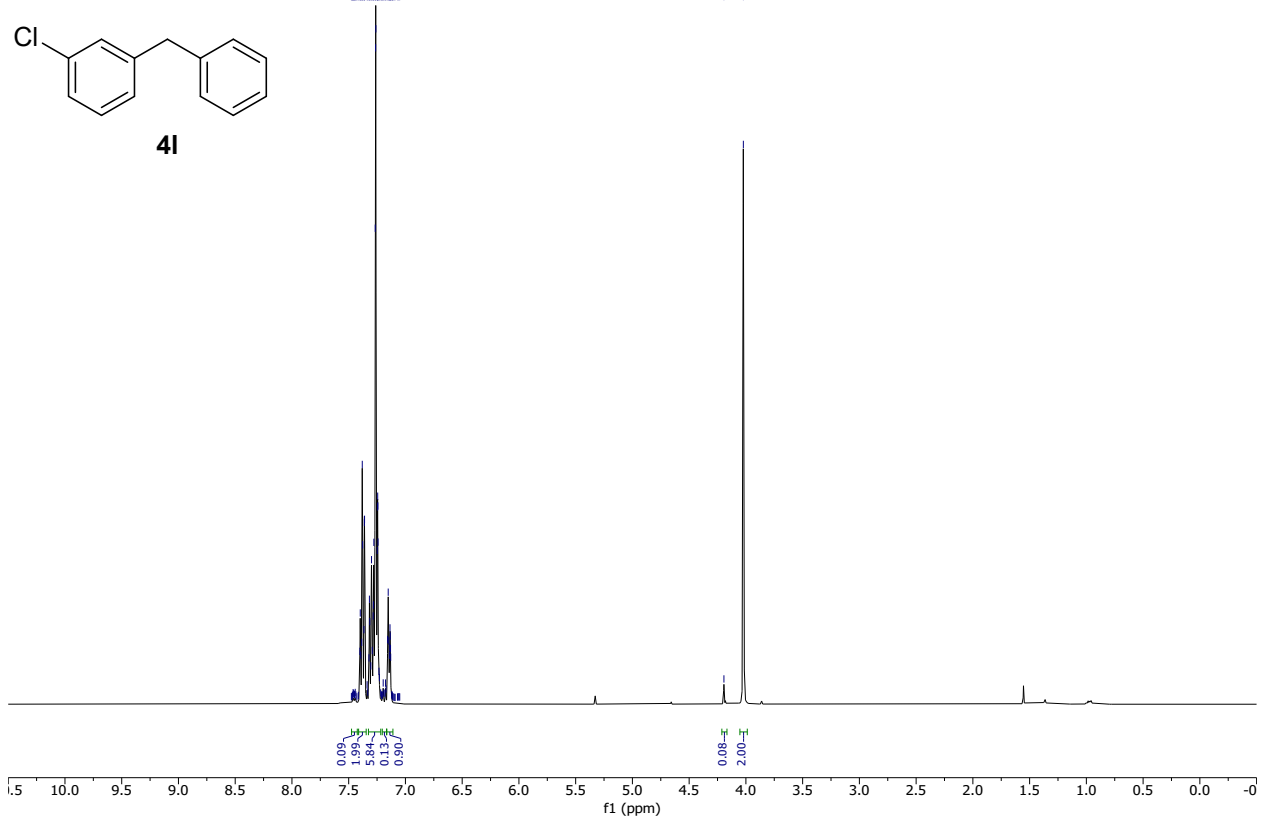

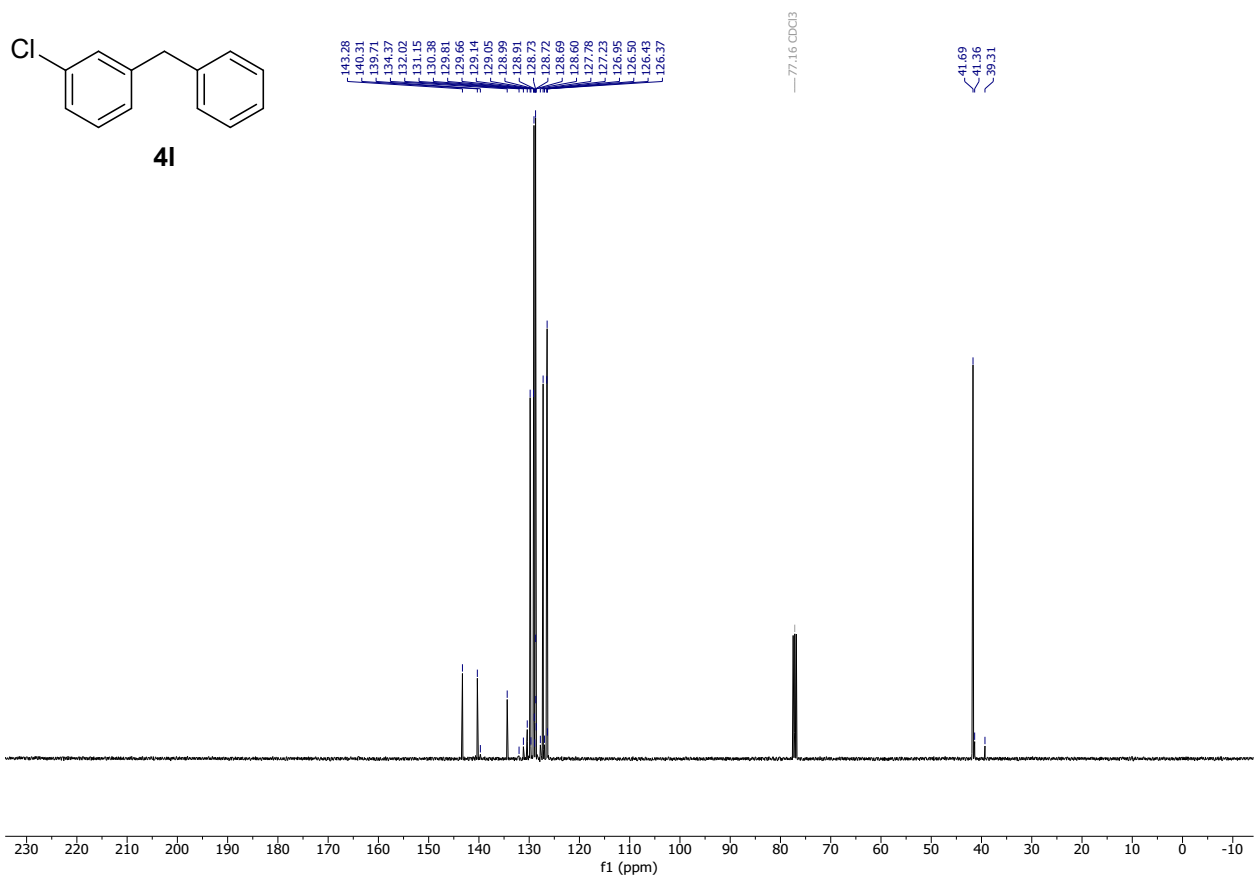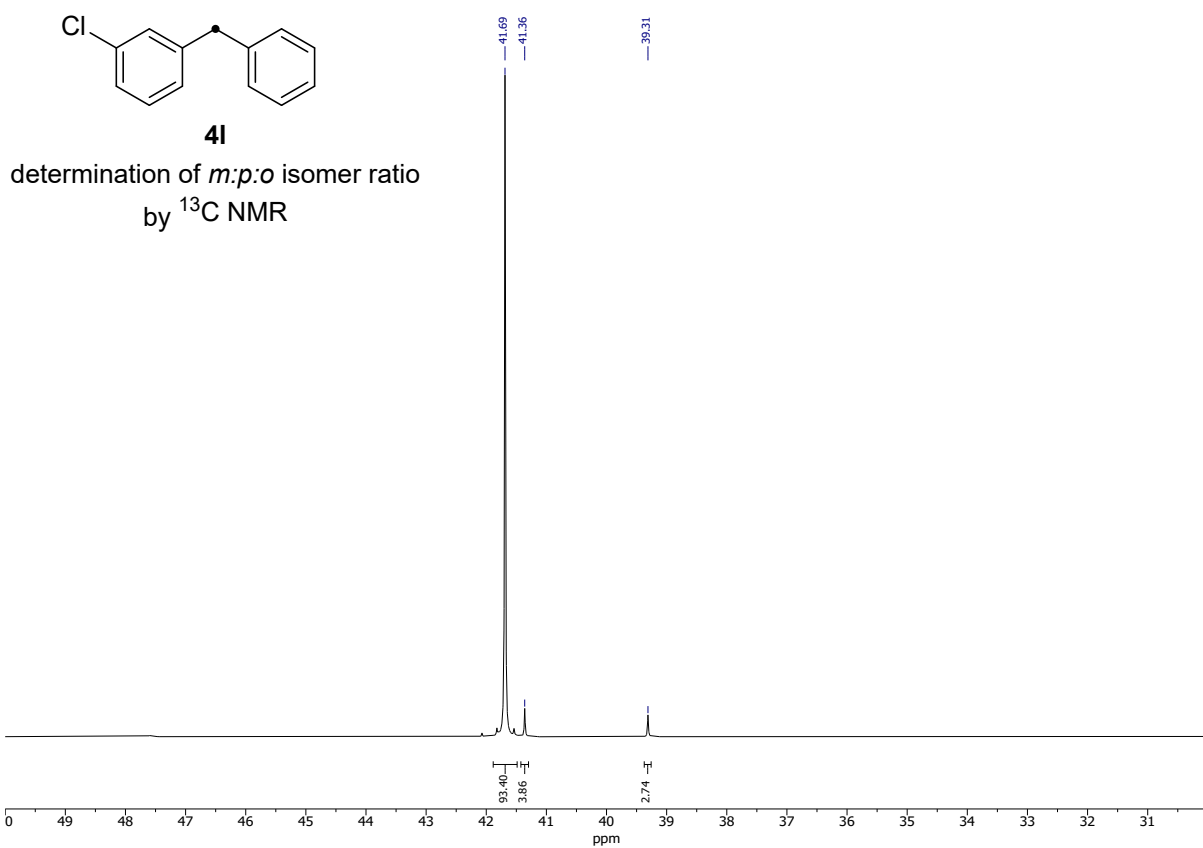

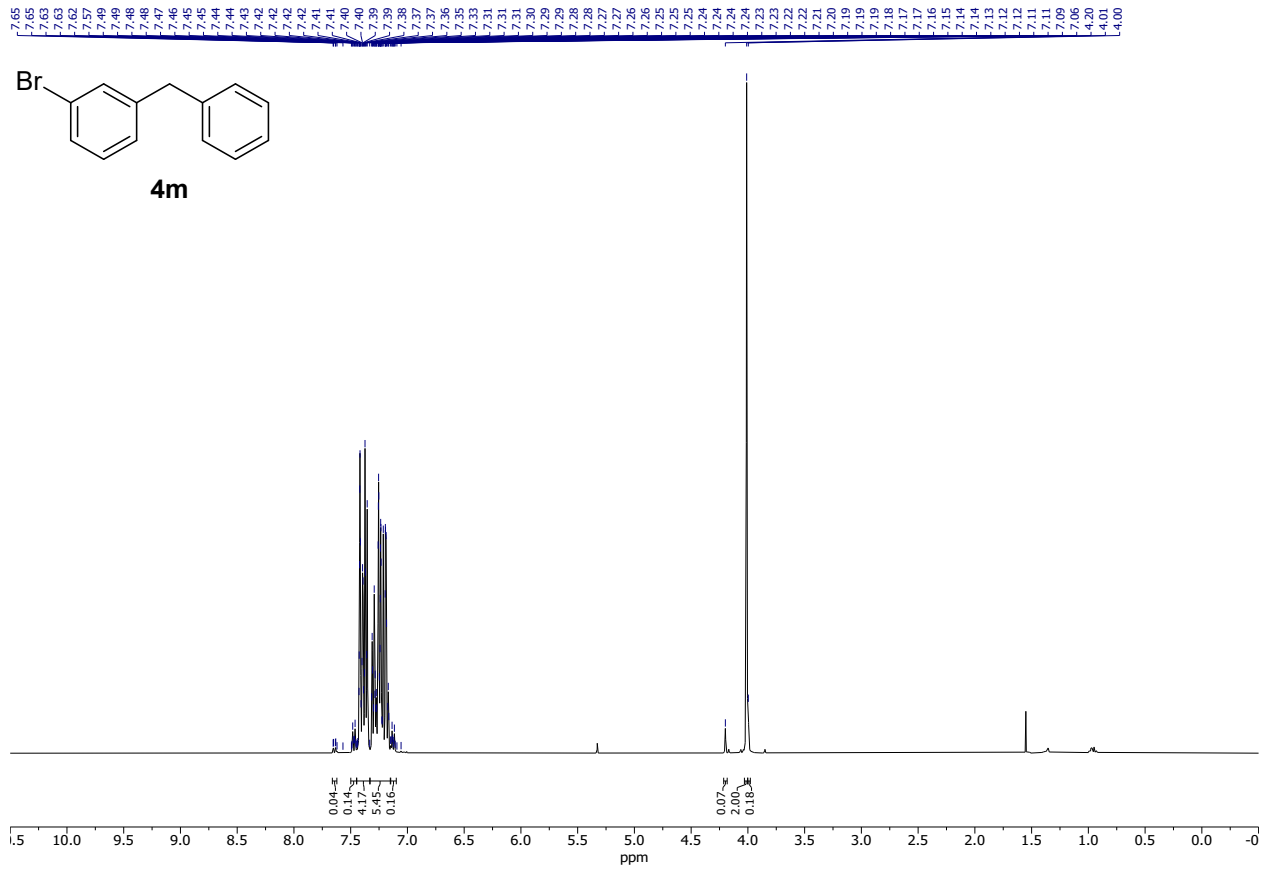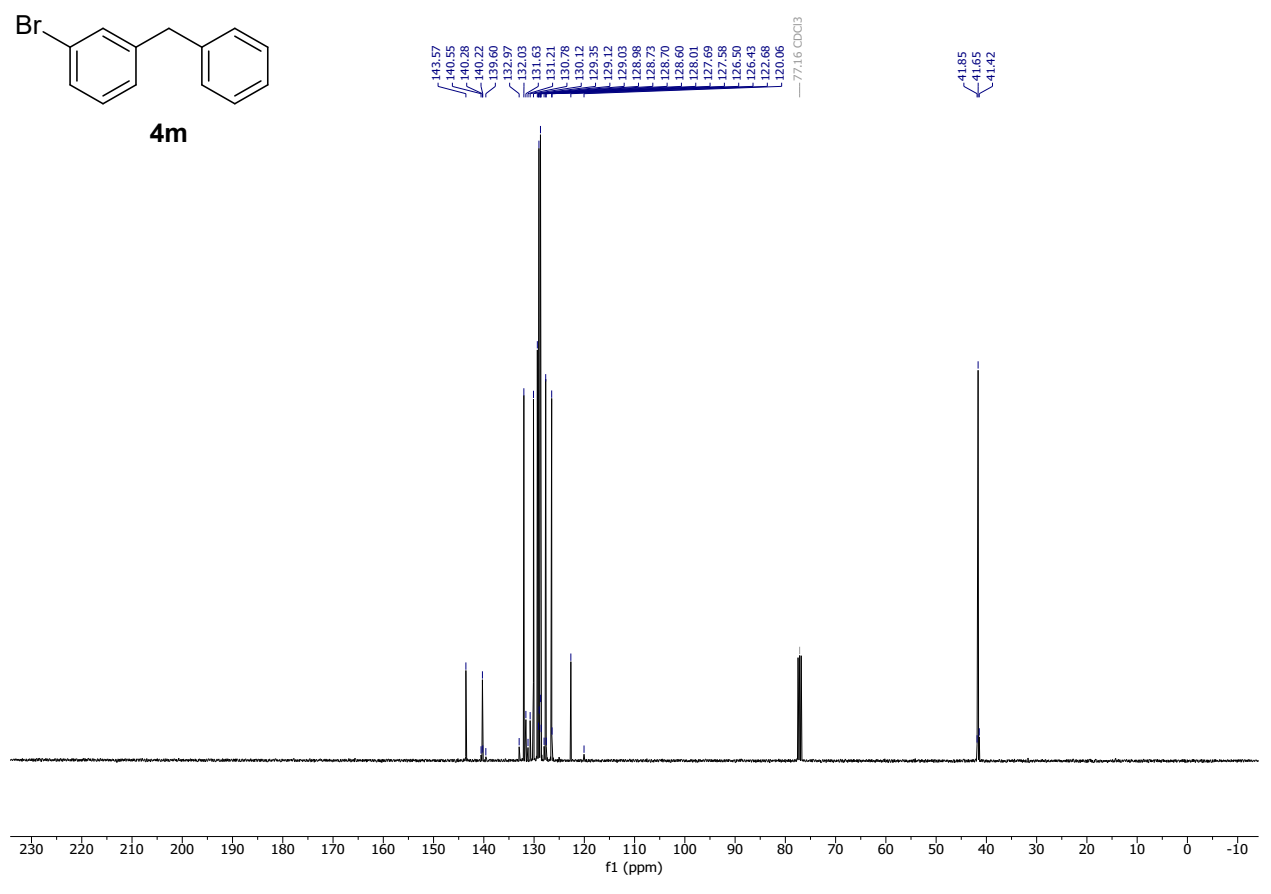

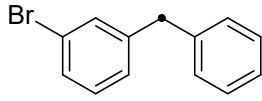

**4m**

determination of *m:p:o* isomer ratio  
by  $^{13}\text{C}$  NMR

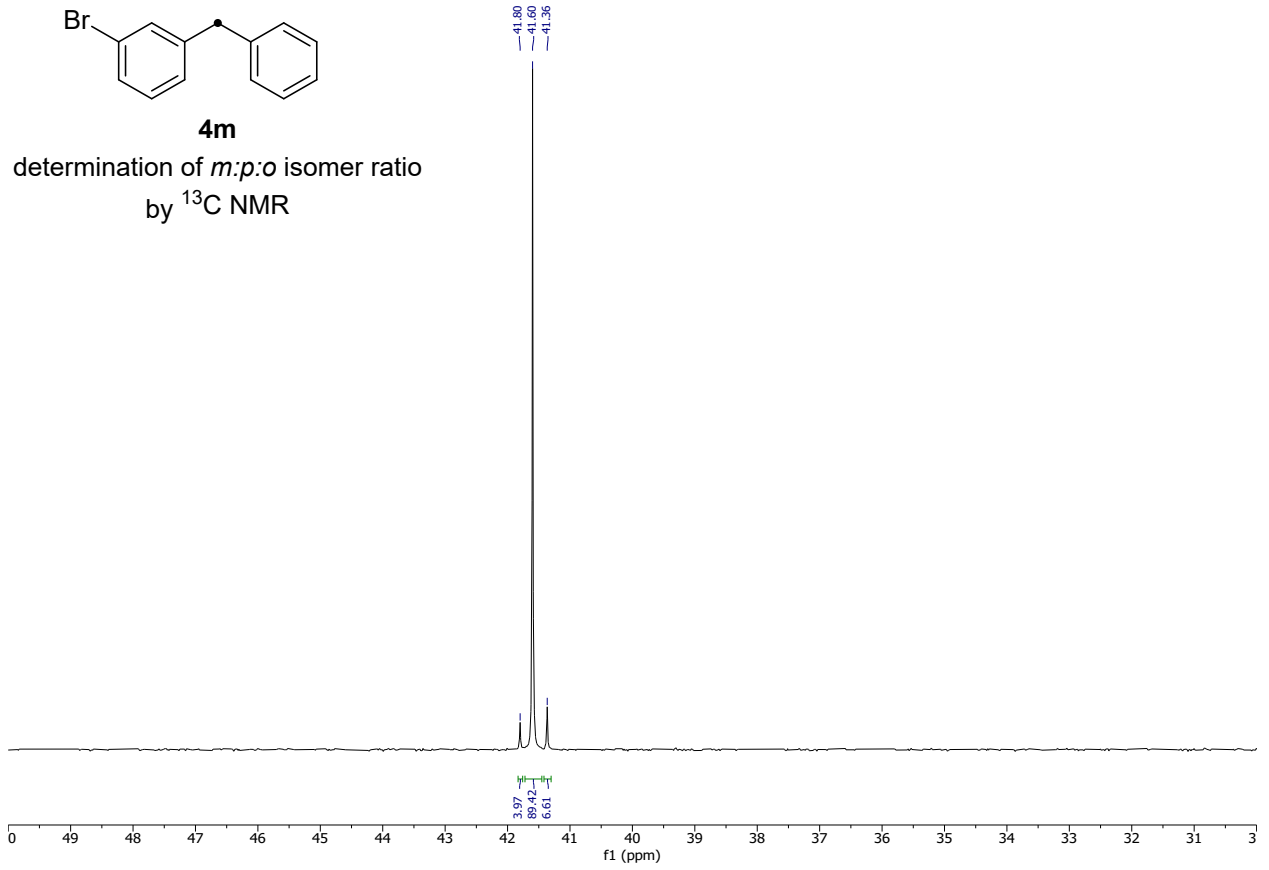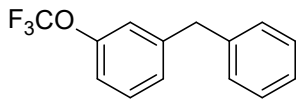

**4n**

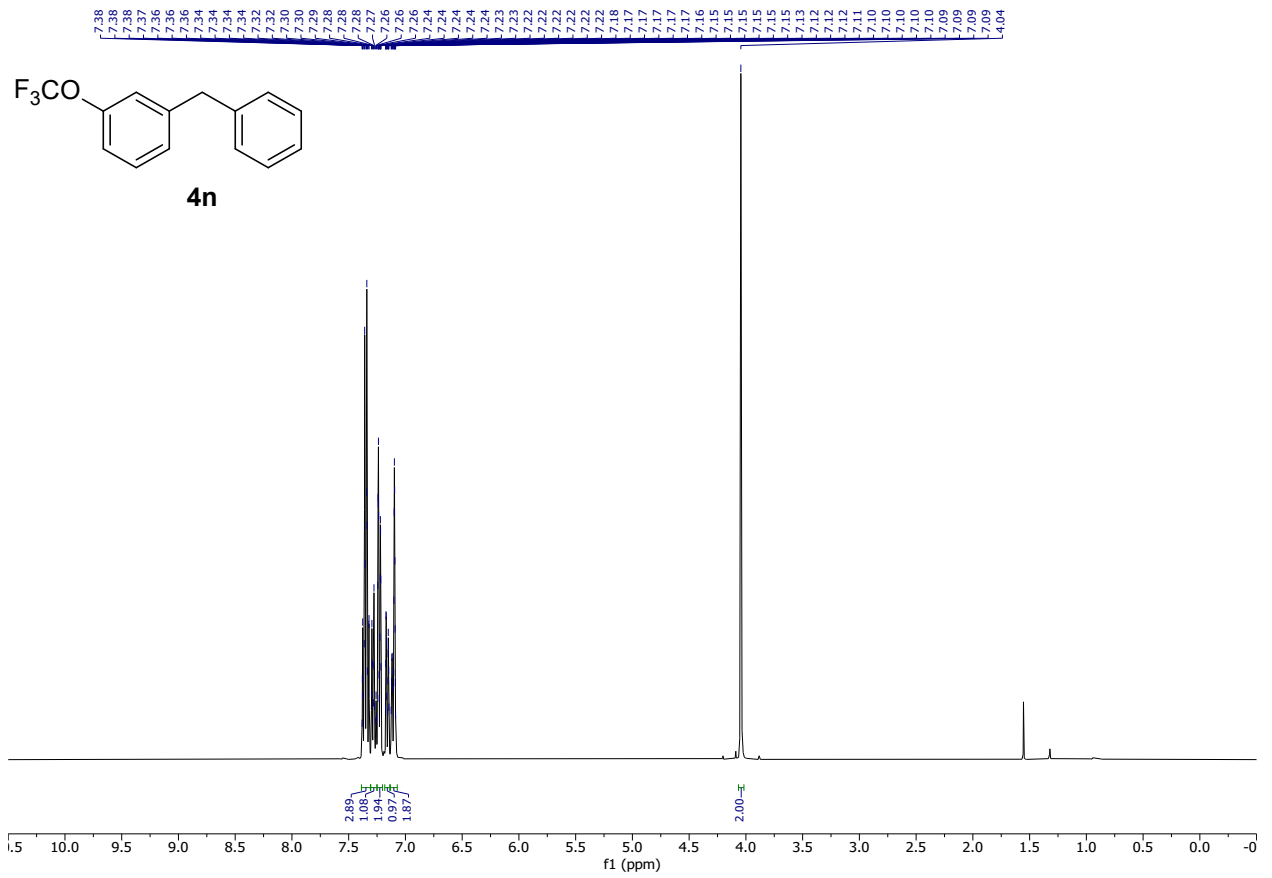

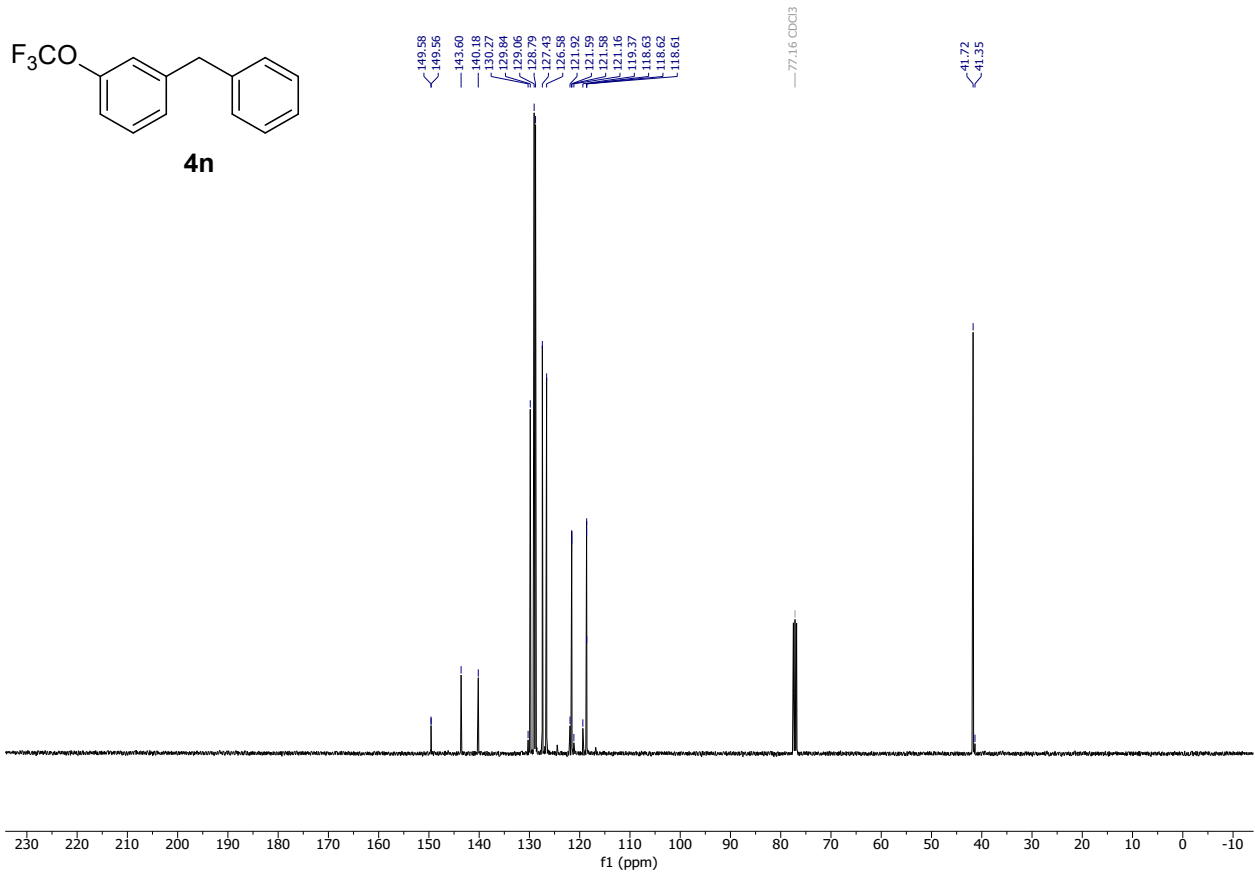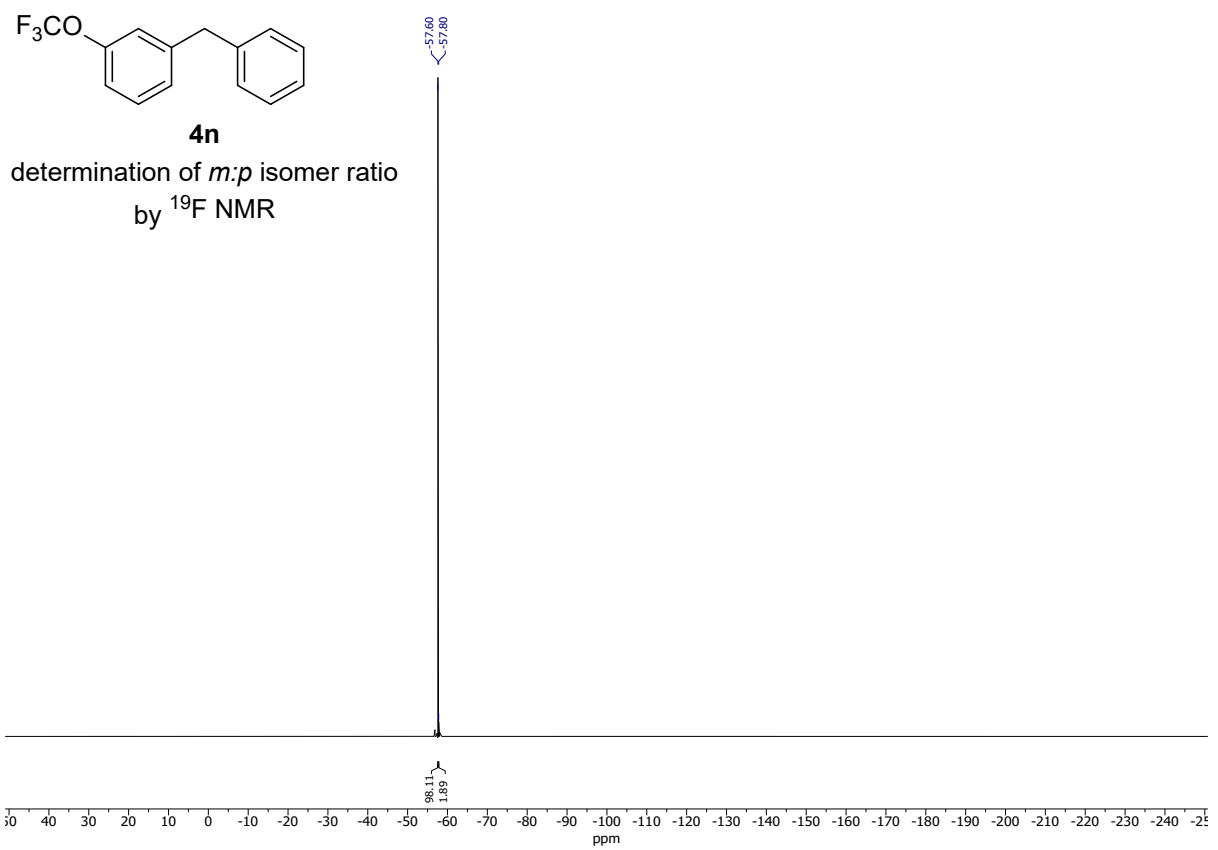

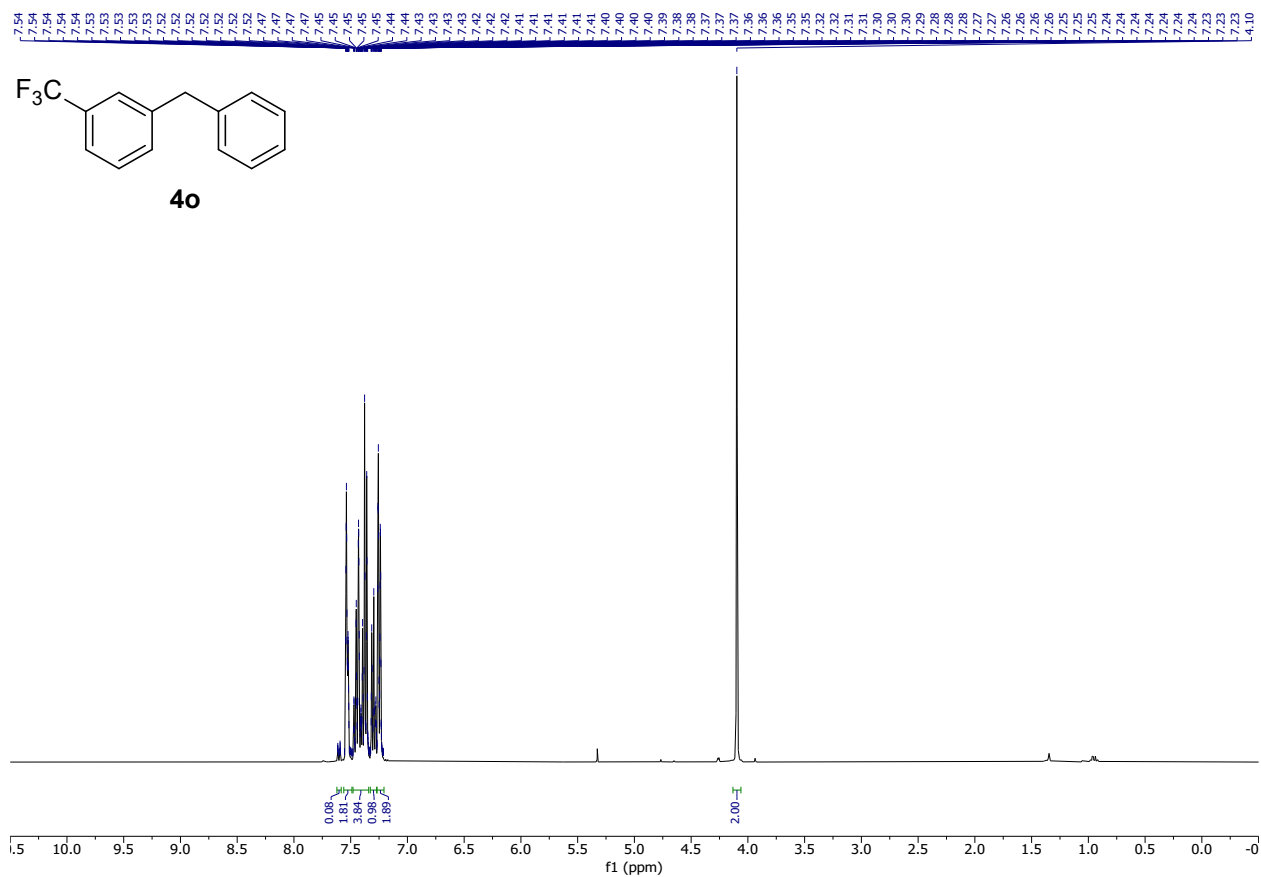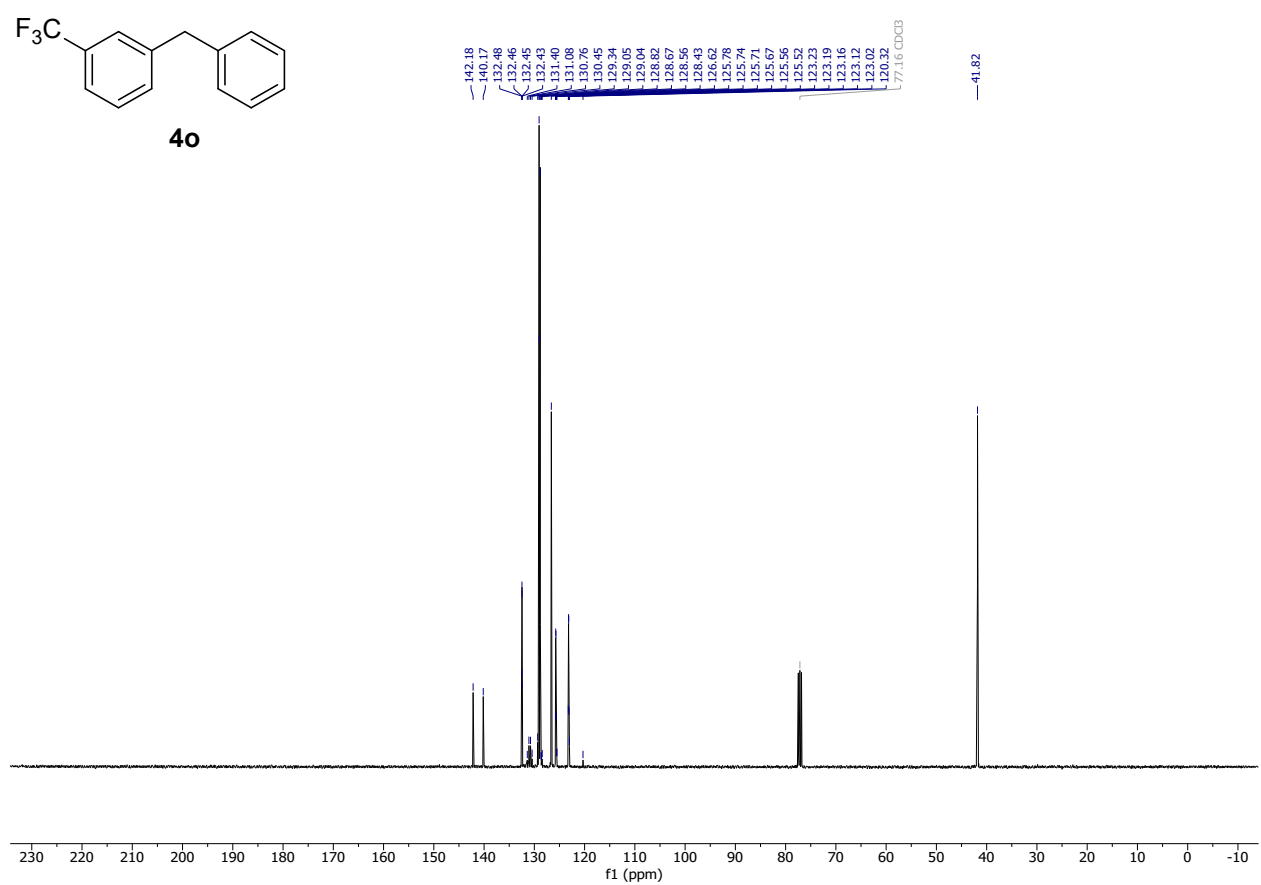

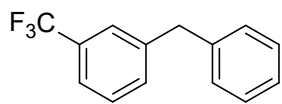

**4o**

determination of *m:p* isomer ratio  
by  $^{19}\text{F}$  NMR

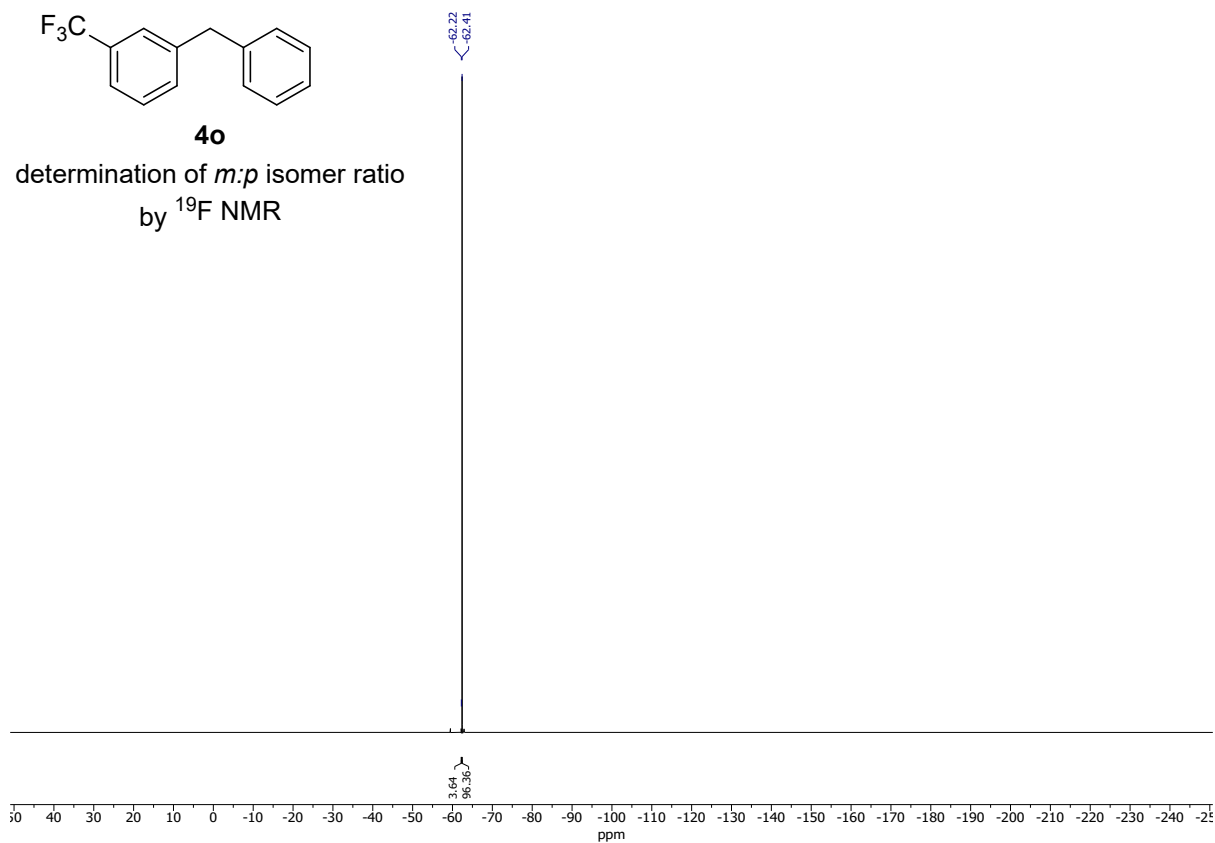

7.37  
7.37  
7.36  
7.36  
7.36  
7.35  
7.35  
7.34  
7.34  
7.33  
7.33  
7.32  
7.32  
7.32  
7.31  
7.31  
7.30  
7.28  
7.28  
7.27  
7.27  
7.27  
7.26  
7.26  
7.26  
7.25  
7.25  
7.24  
7.24  
7.24  
7.23  
7.23  
7.22  
7.22  
7.21  
7.21  
7.20  
7.20  
7.19  
7.19  
7.19  
7.18  
7.18  
7.18  
7.18  
7.18  
7.17  
7.17  
7.17  
7.16  
7.16  
7.16  
7.16  
7.15  
7.15  
7.09  
7.09  
7.09  
7.08  
7.08  
7.08  
7.08  
7.08  
7.07  
7.07  
7.07  
7.07  
7.05  
7.05  
7.05  
7.05  
4.06  
4.01  
4.38  
4.31

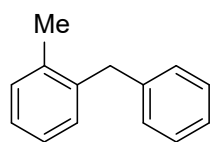

**4p**

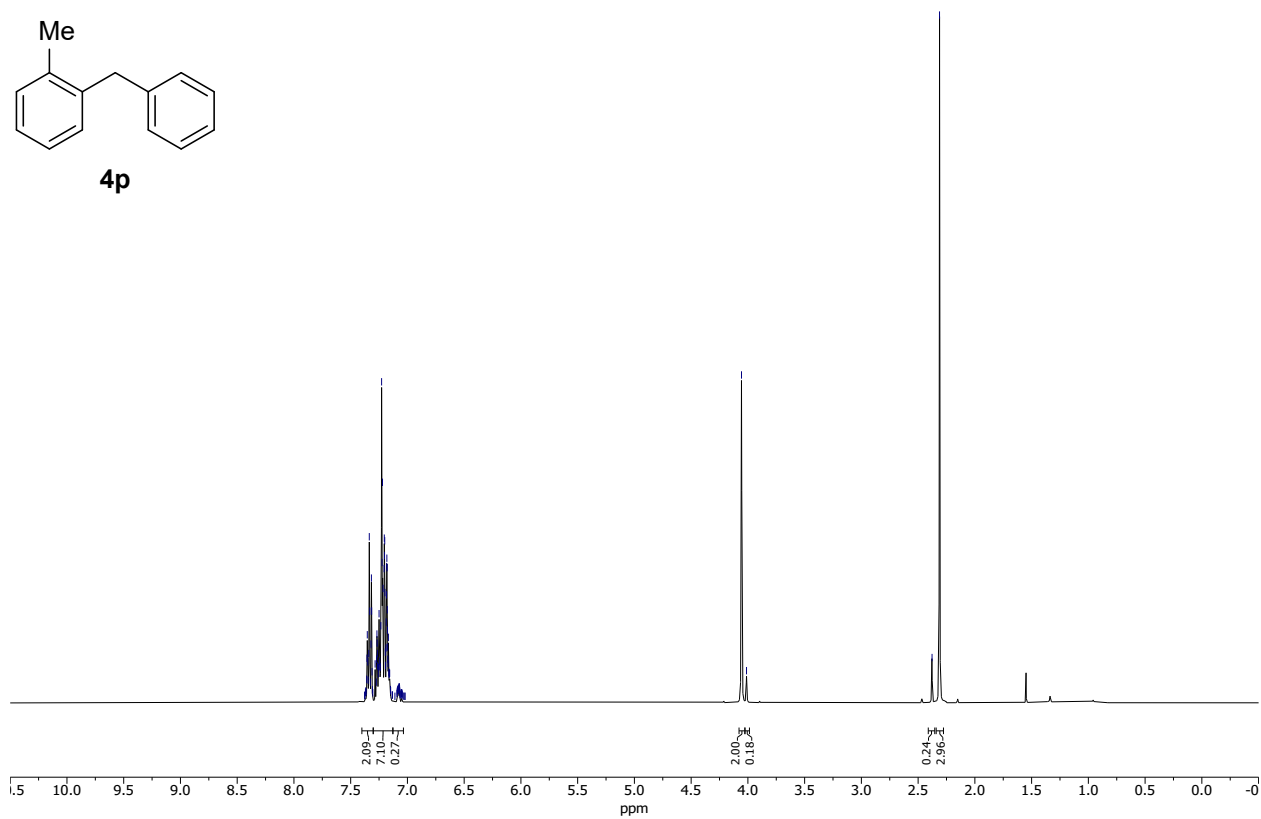

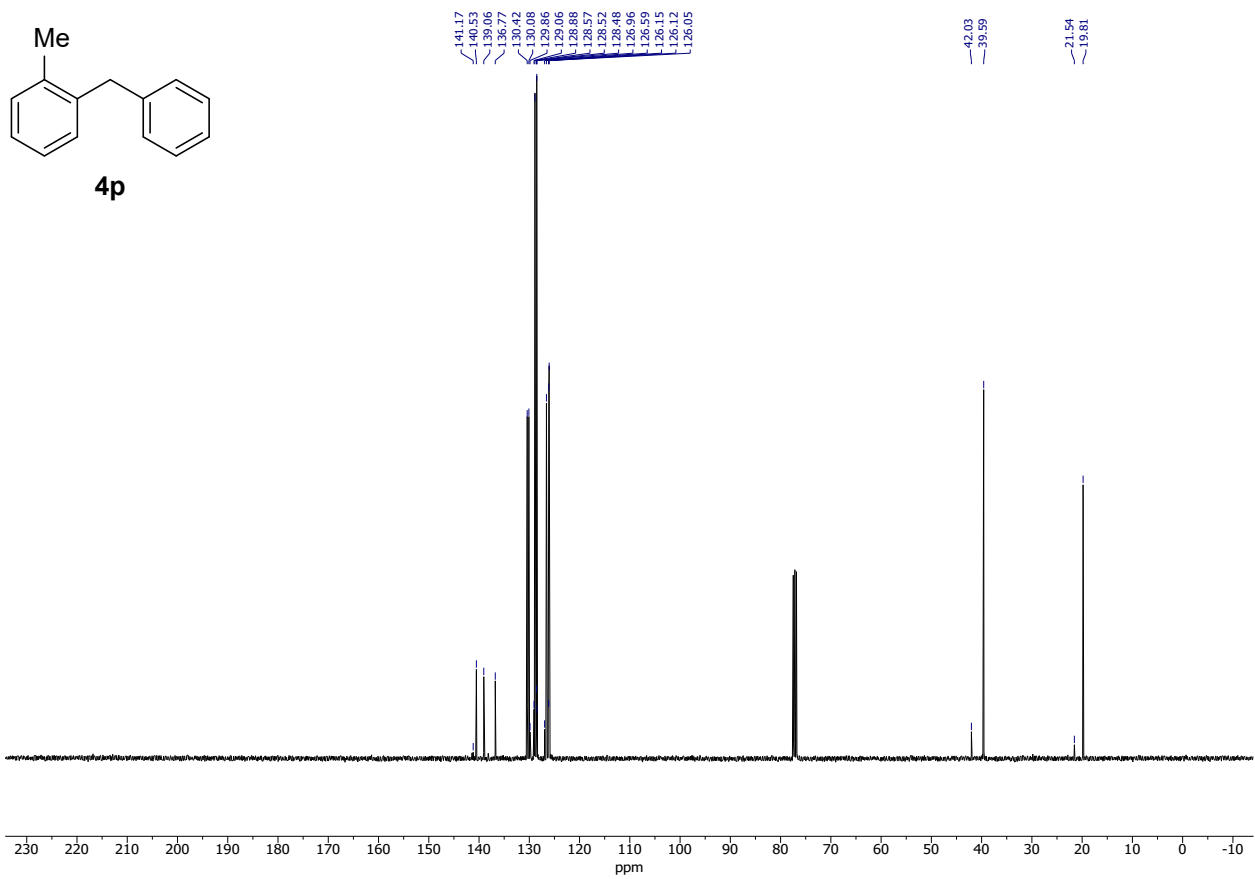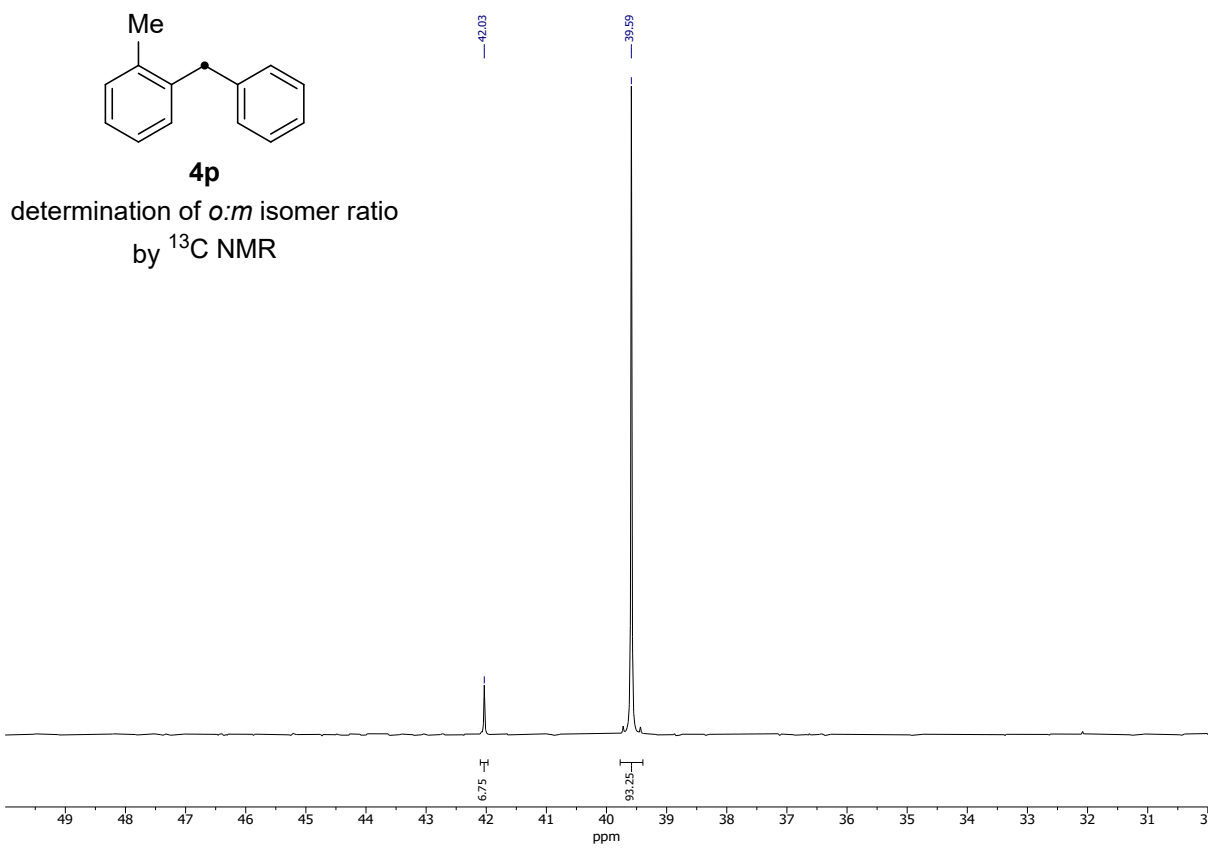



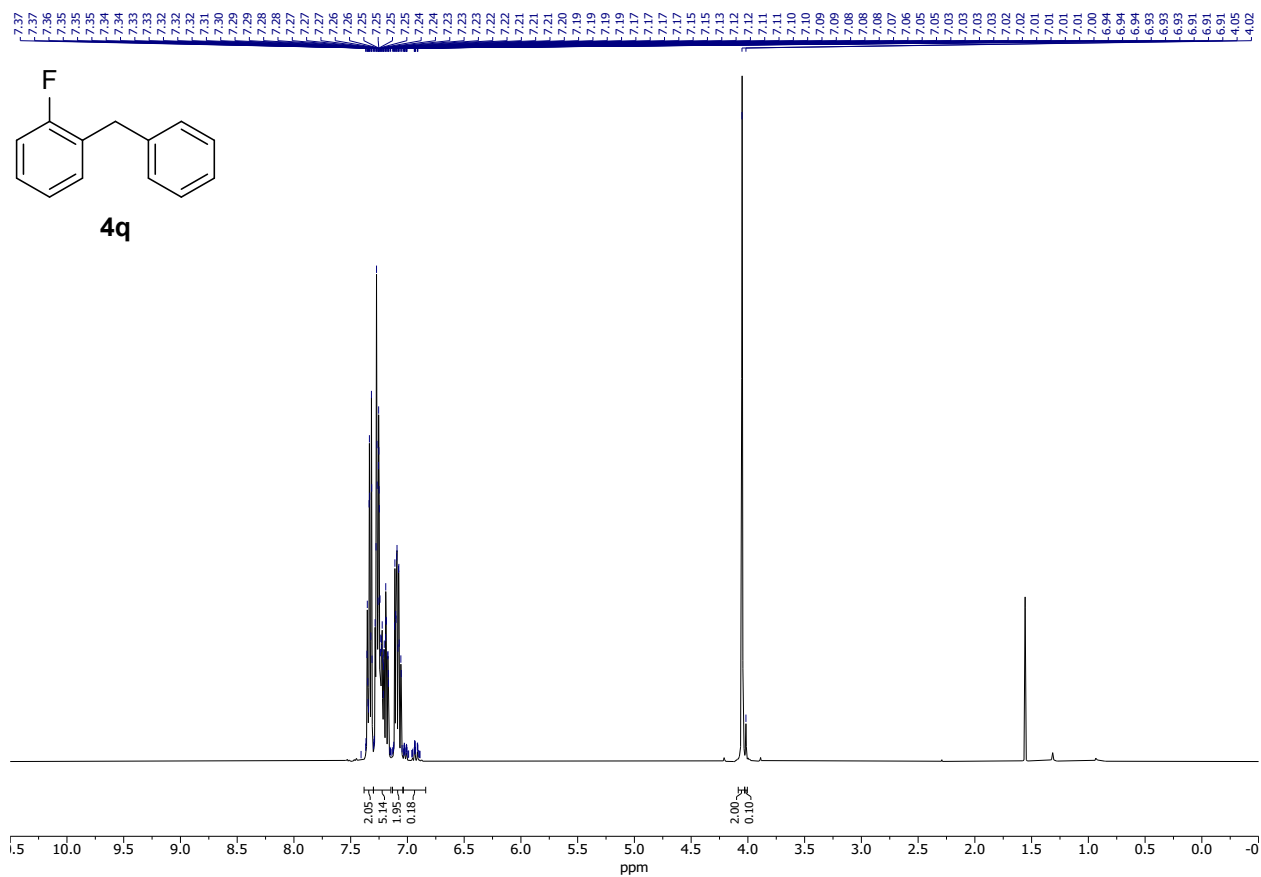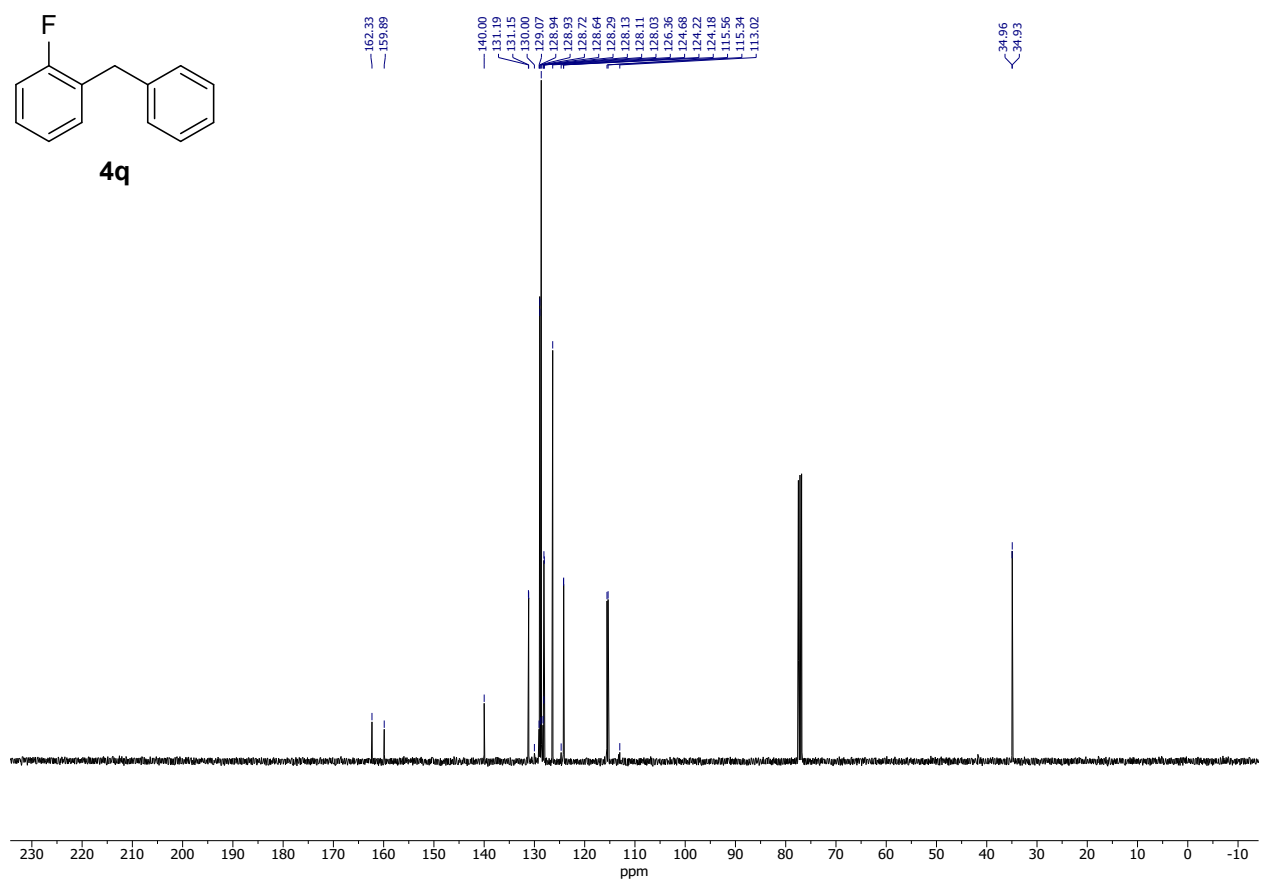

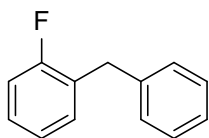

**4q**

determination of *o*:*m* isomer ratio  
by  $^{19}\text{F}$  NMR

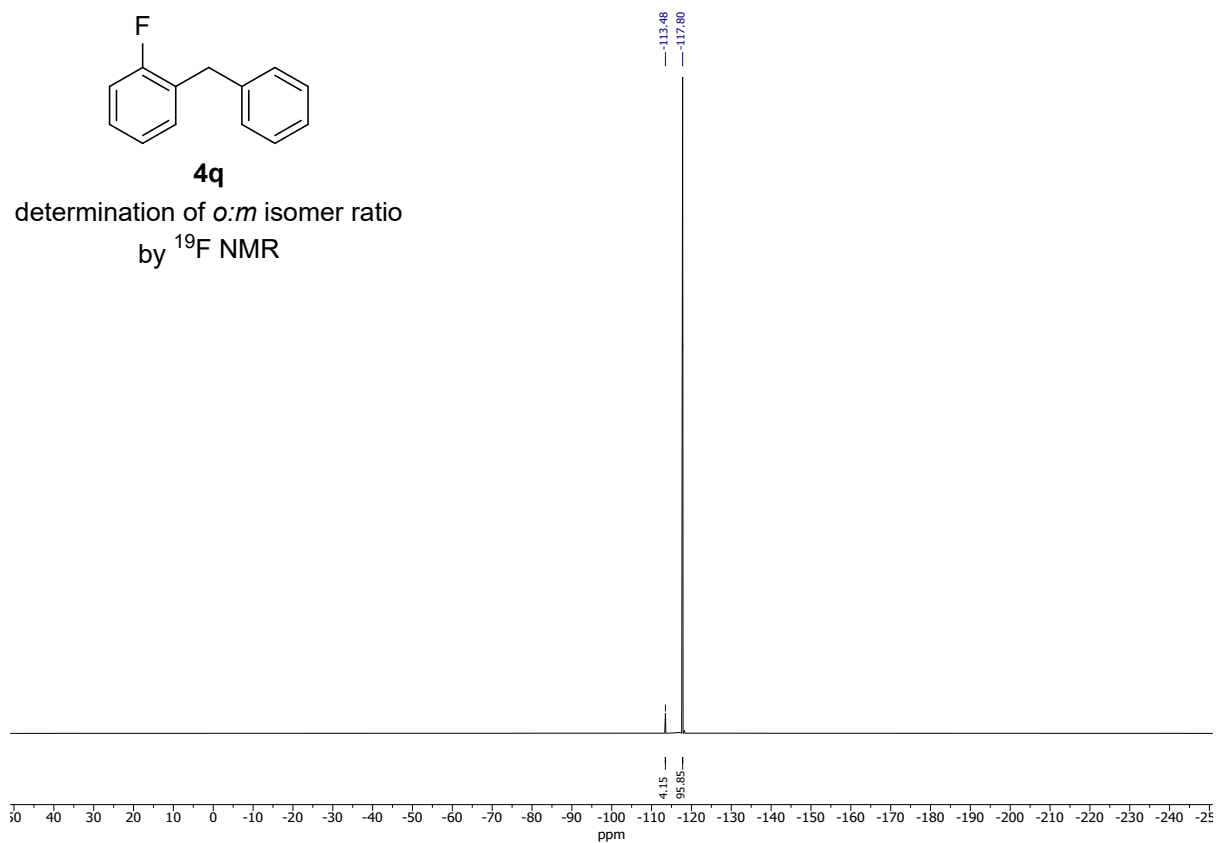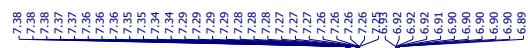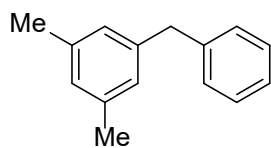

**4r**

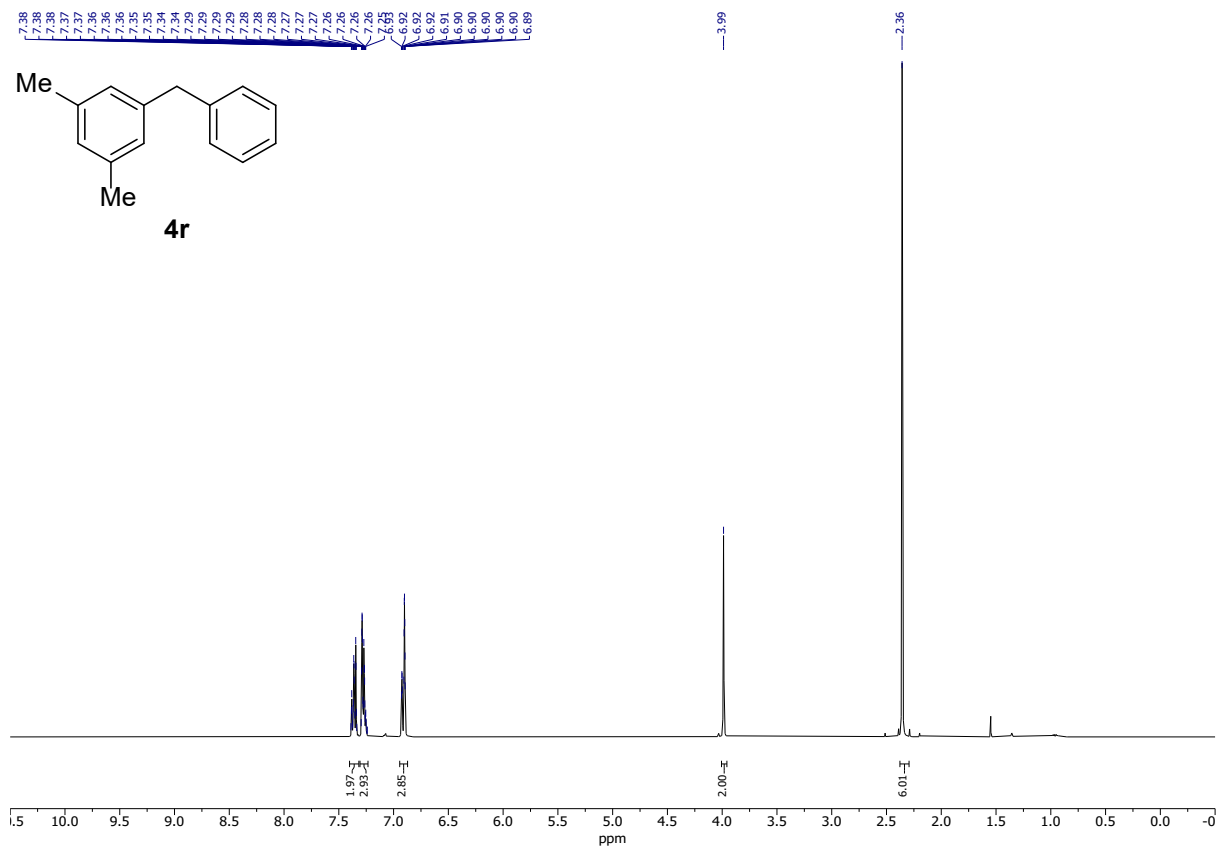

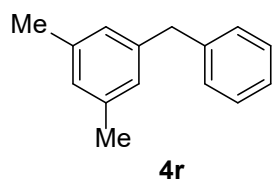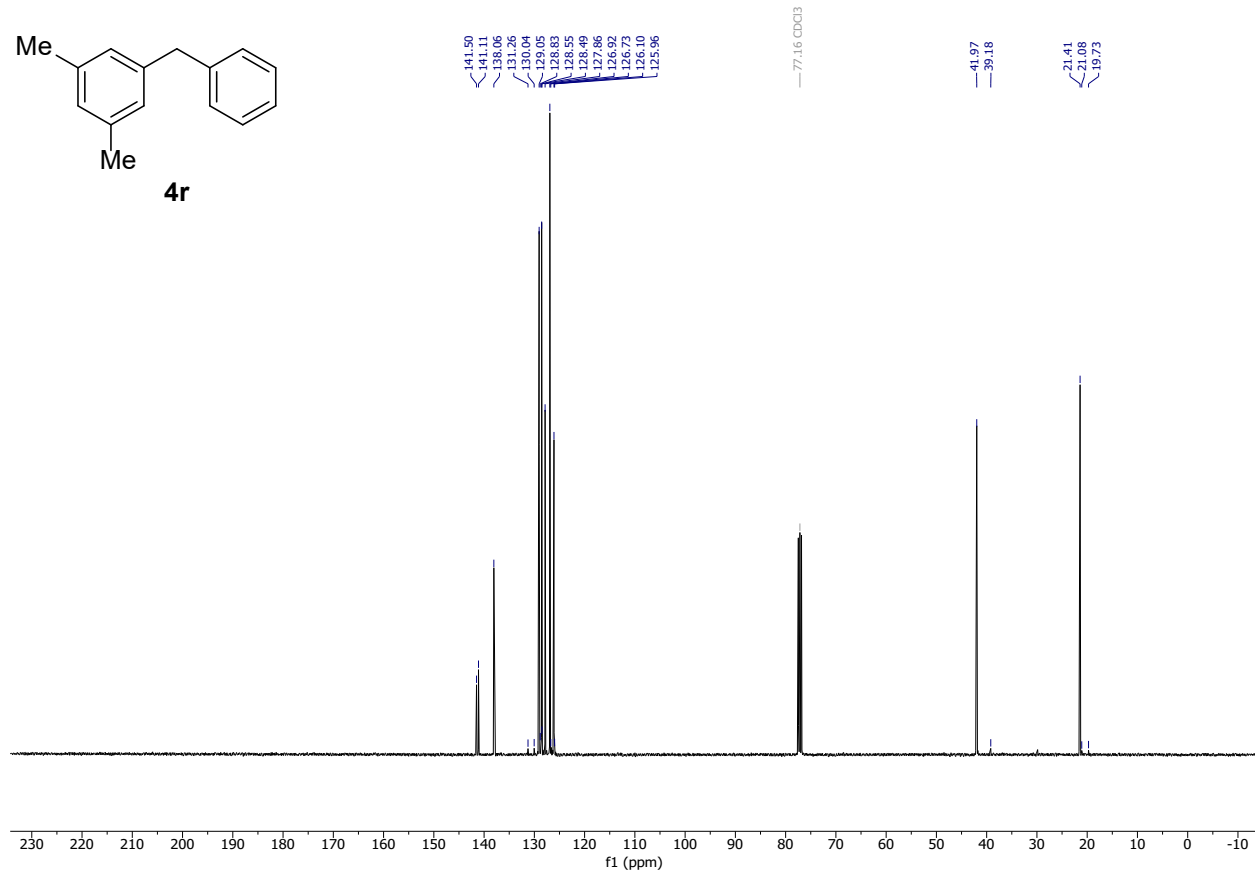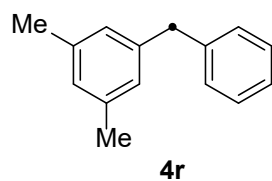

determination of isomer ratio  
by  $^{13}\text{C}$  NMR

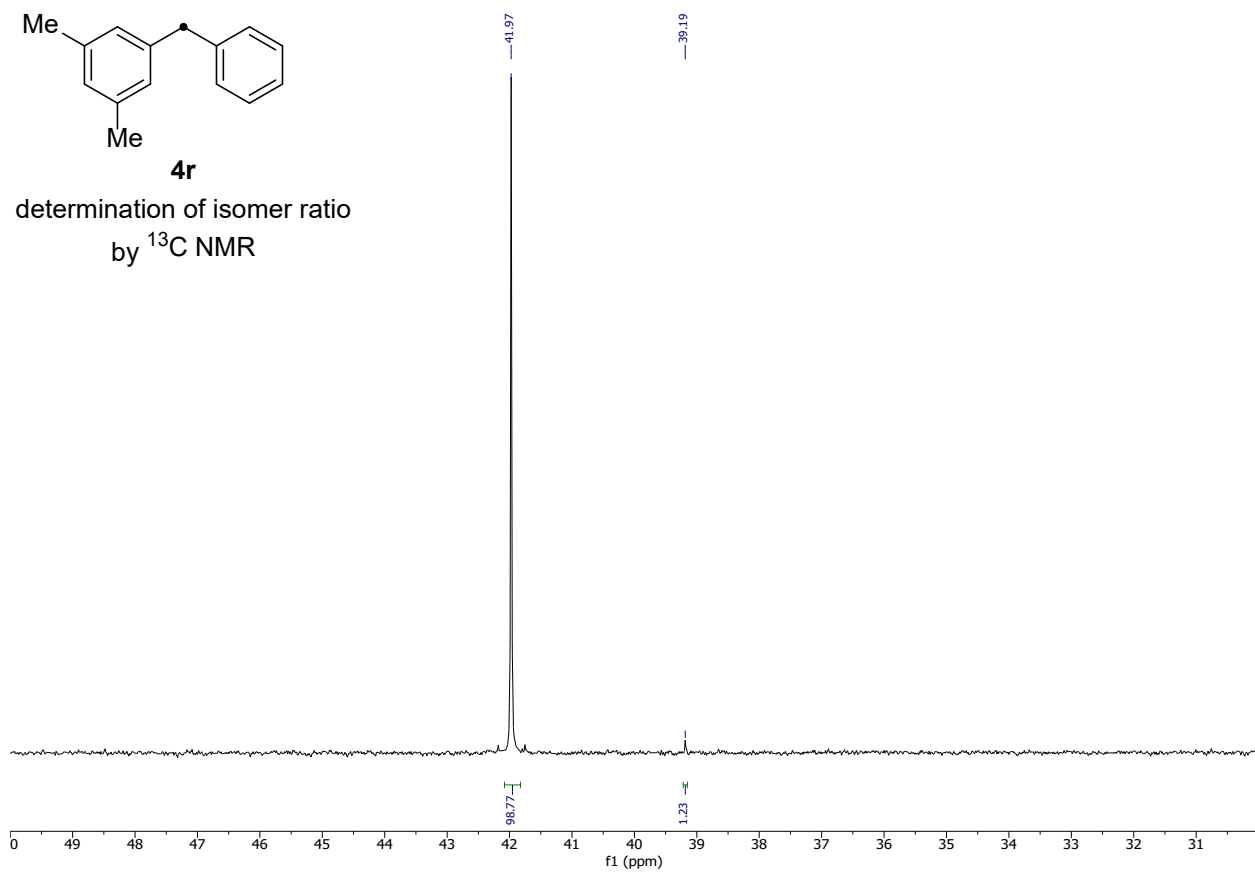

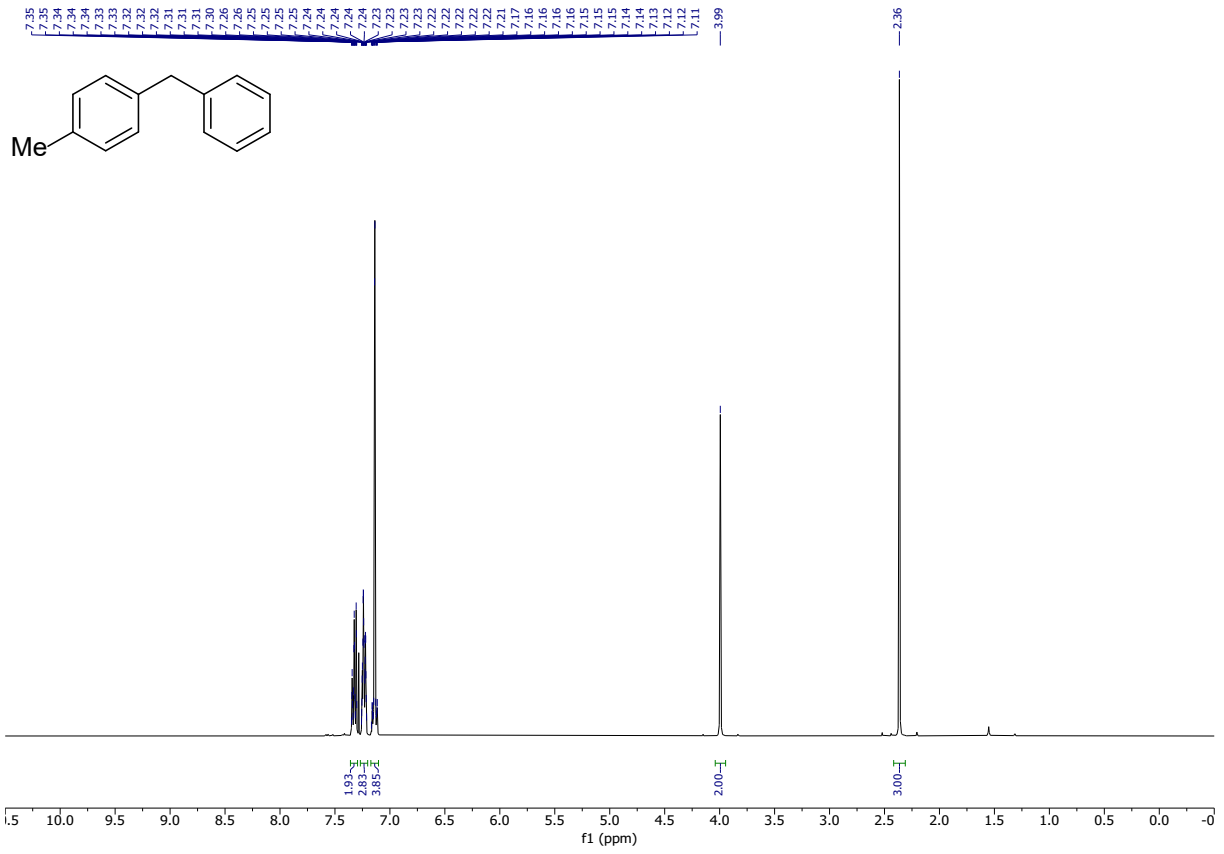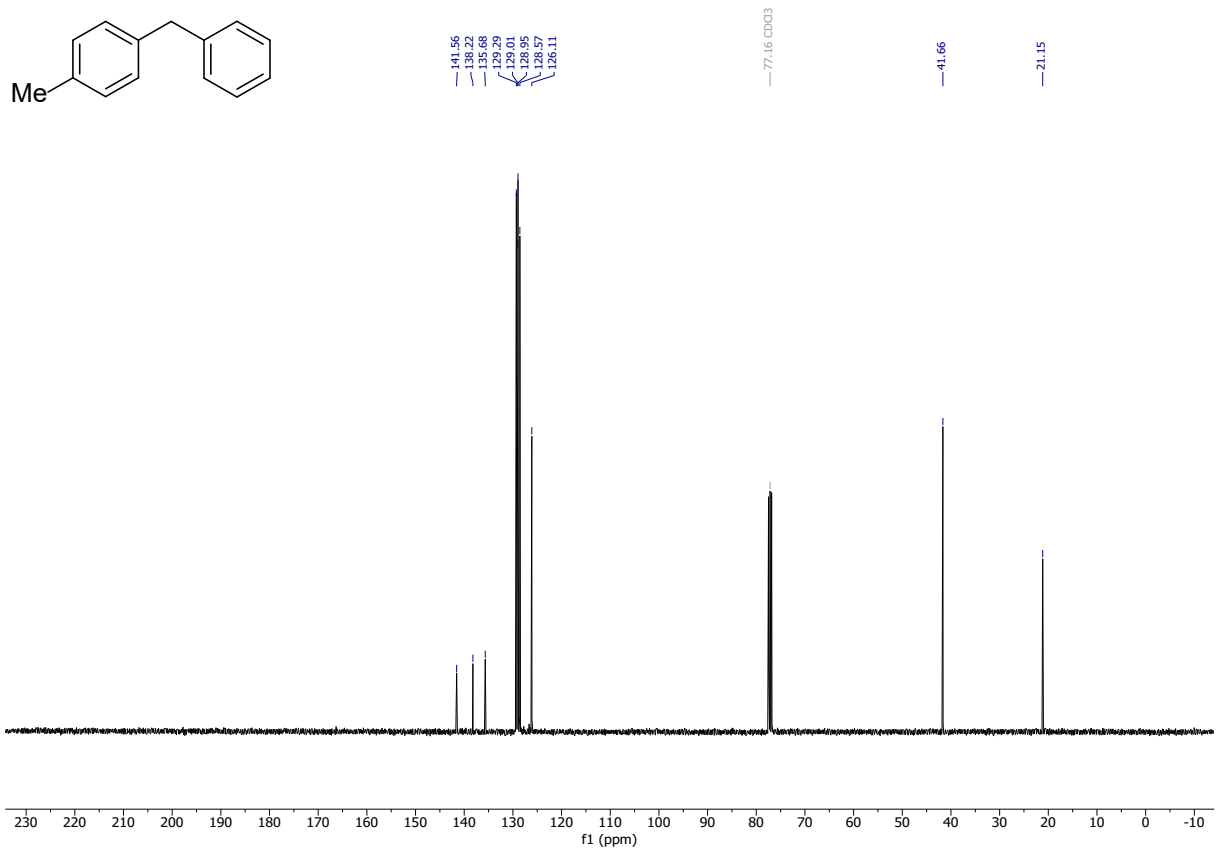



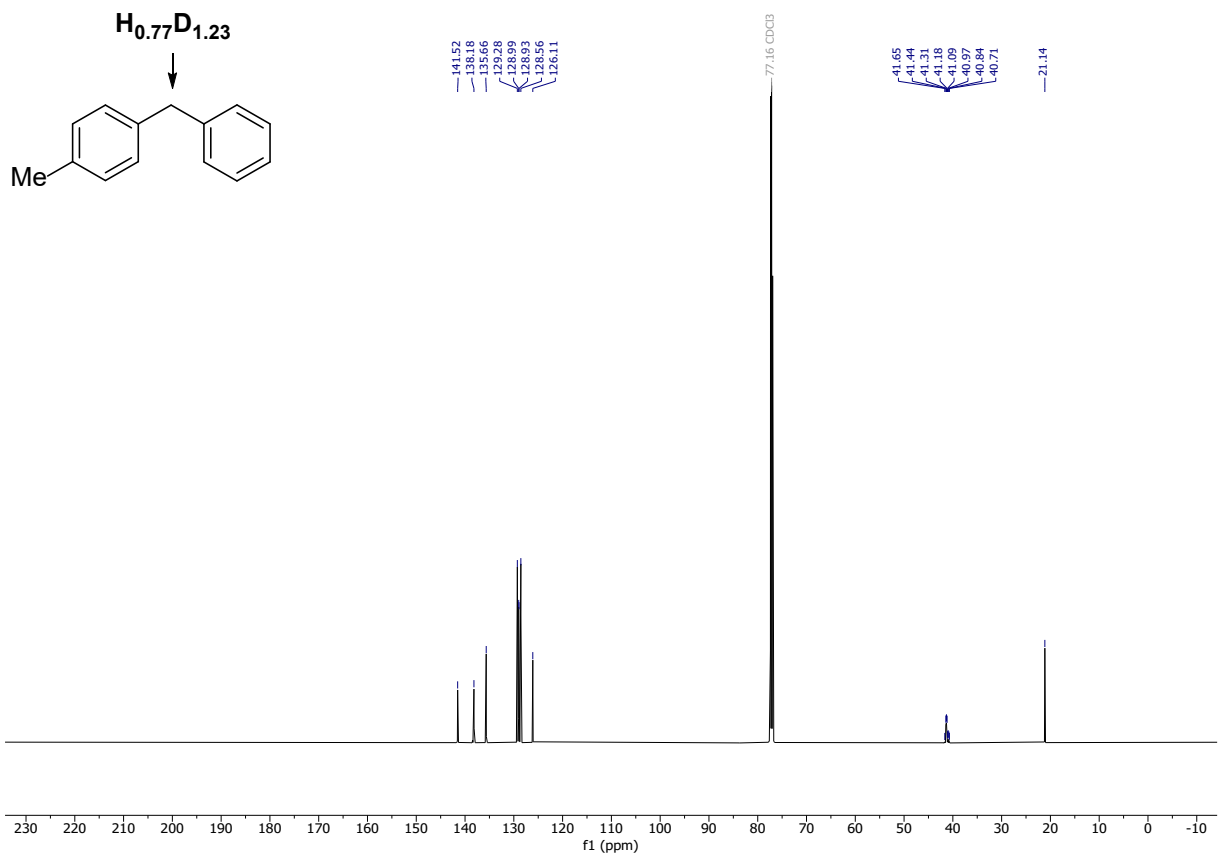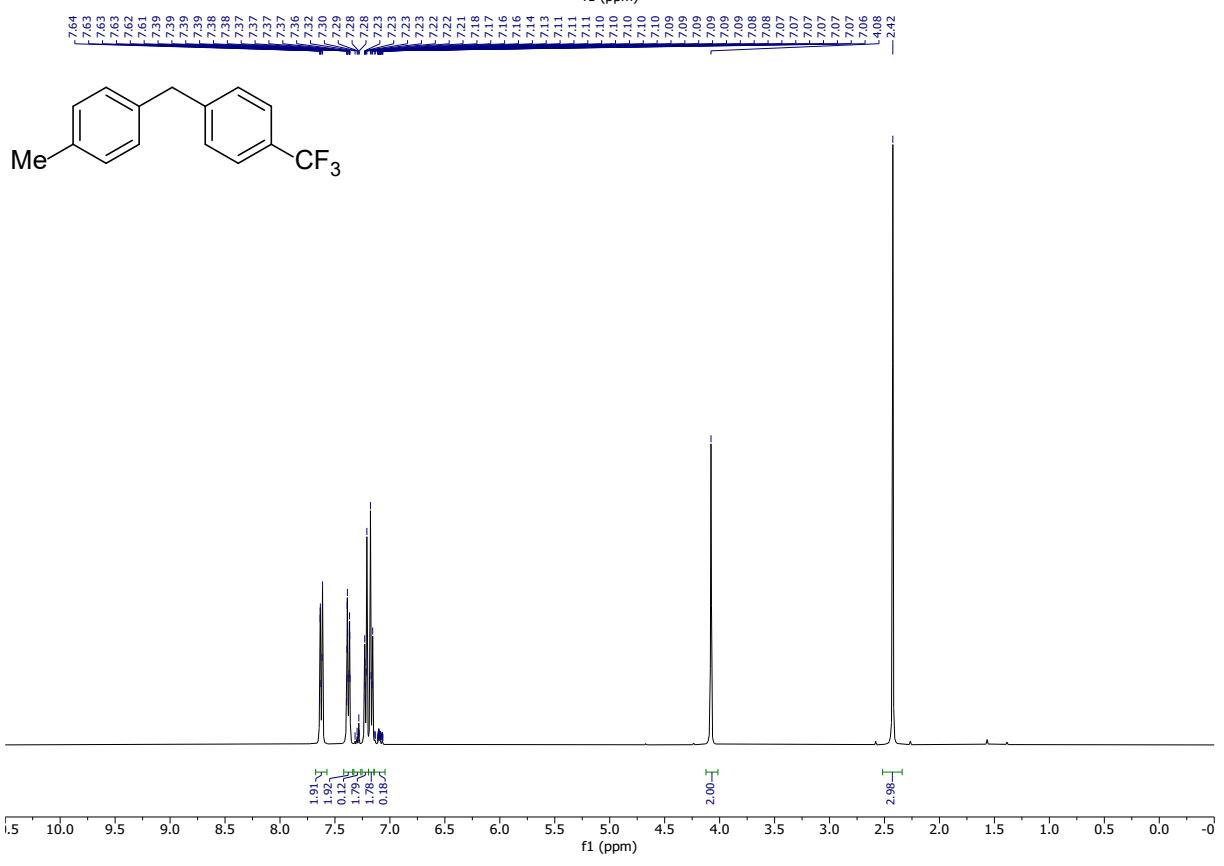

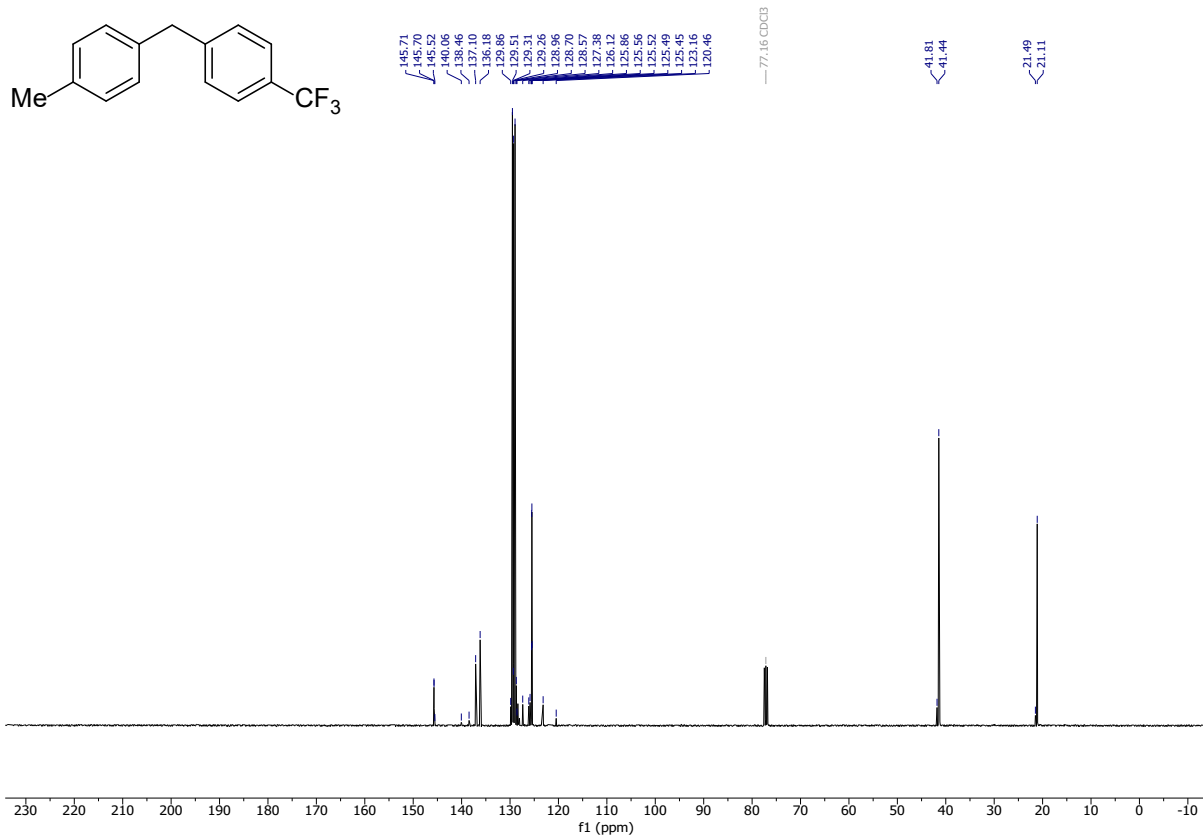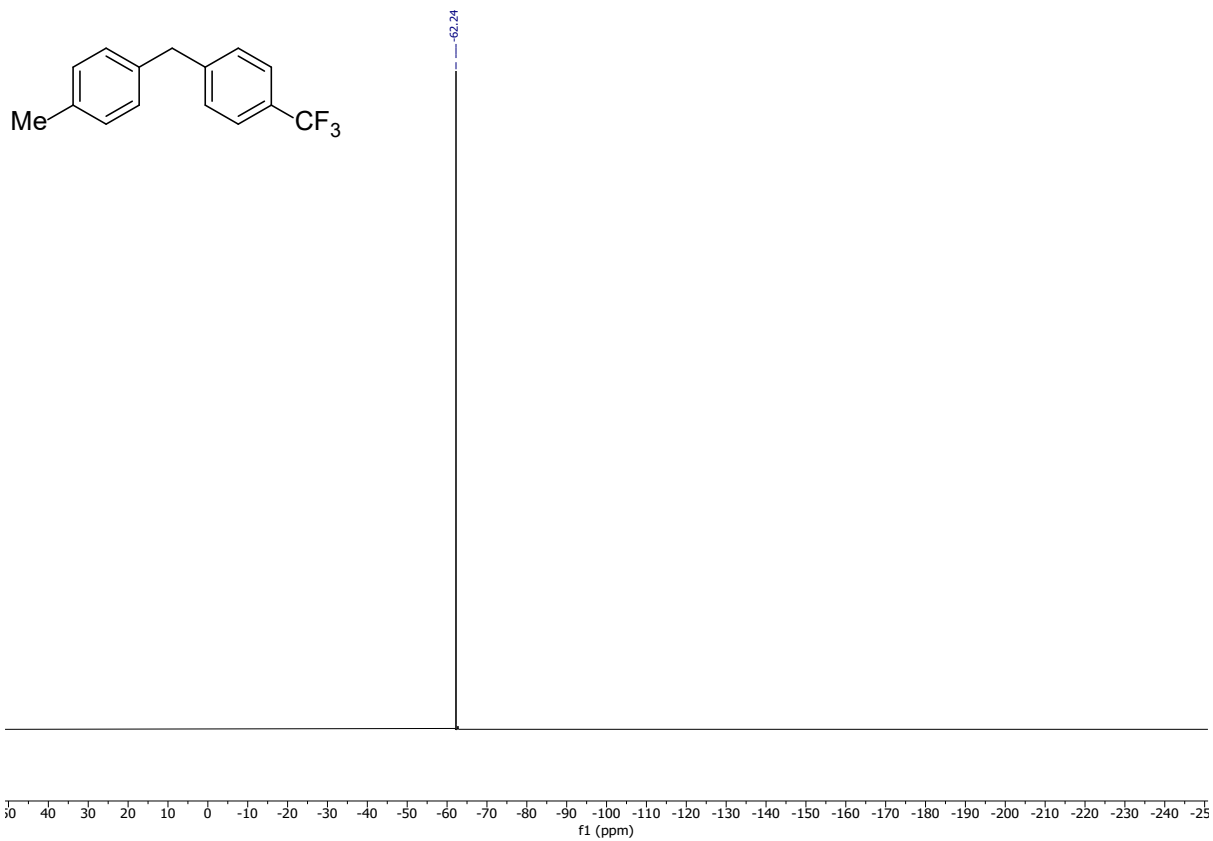

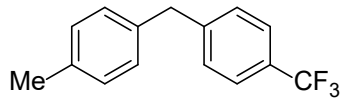

determination of *p:m* isomer ratio

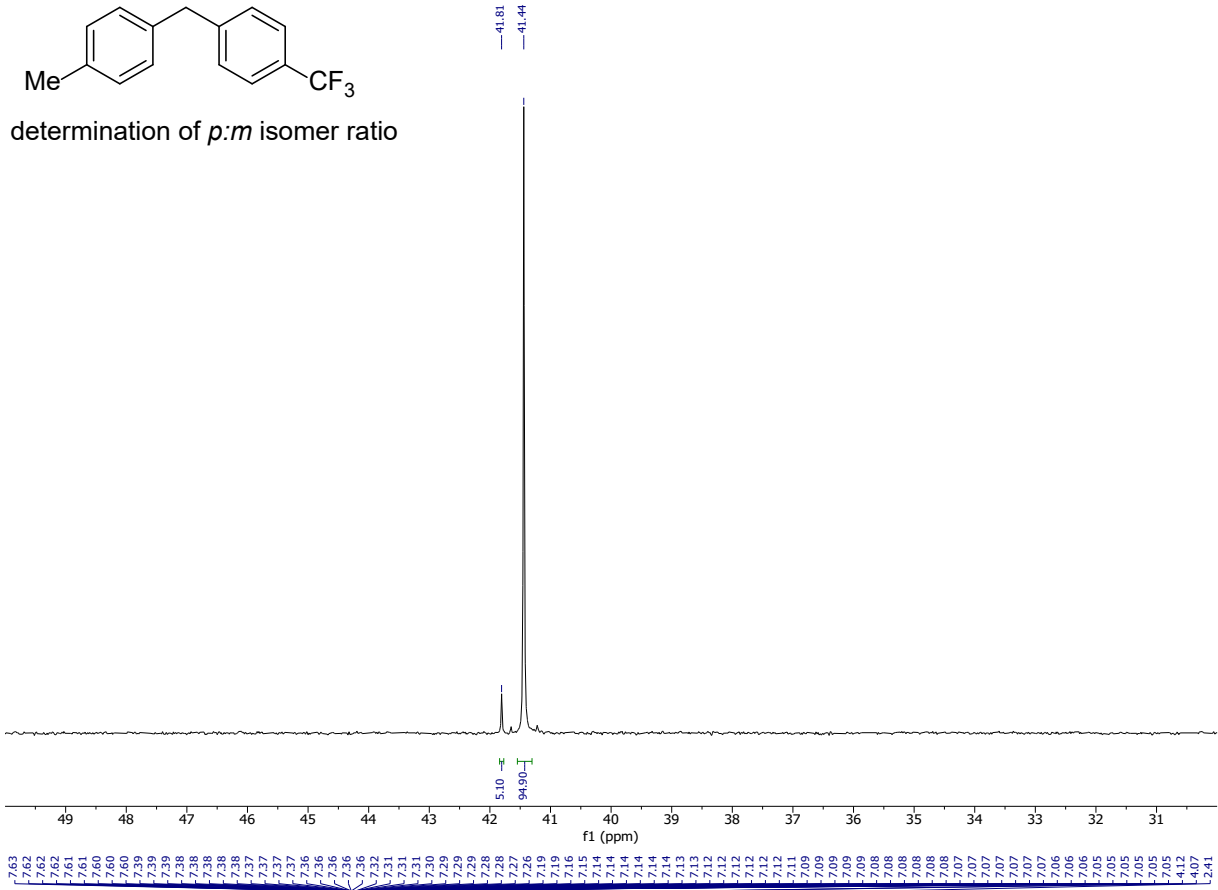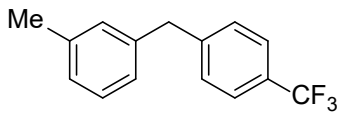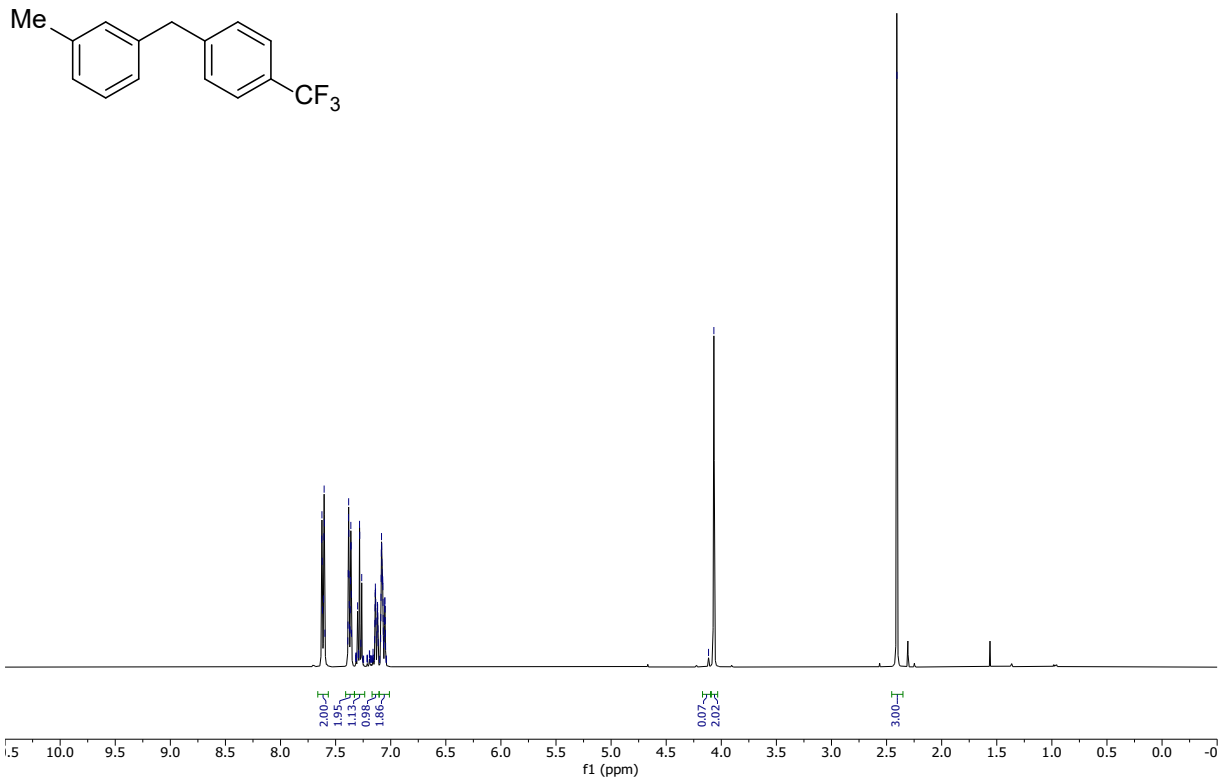



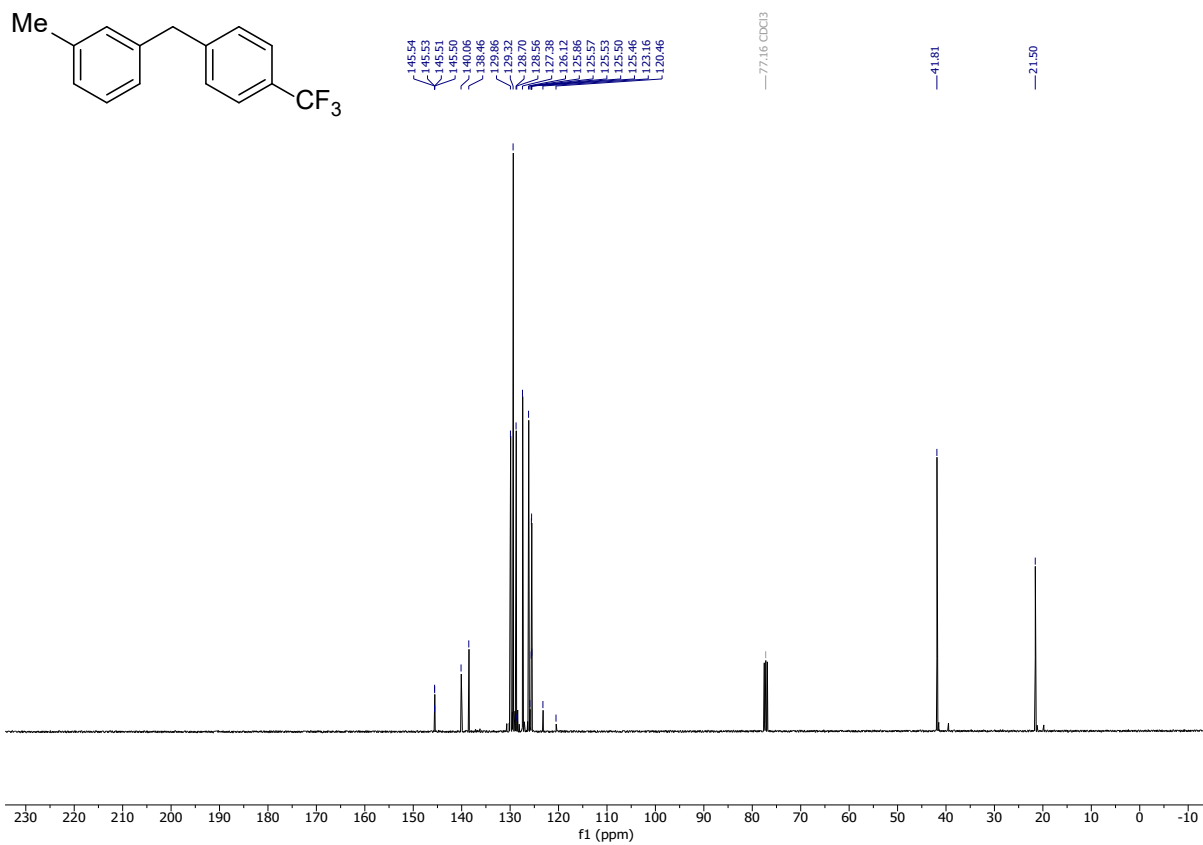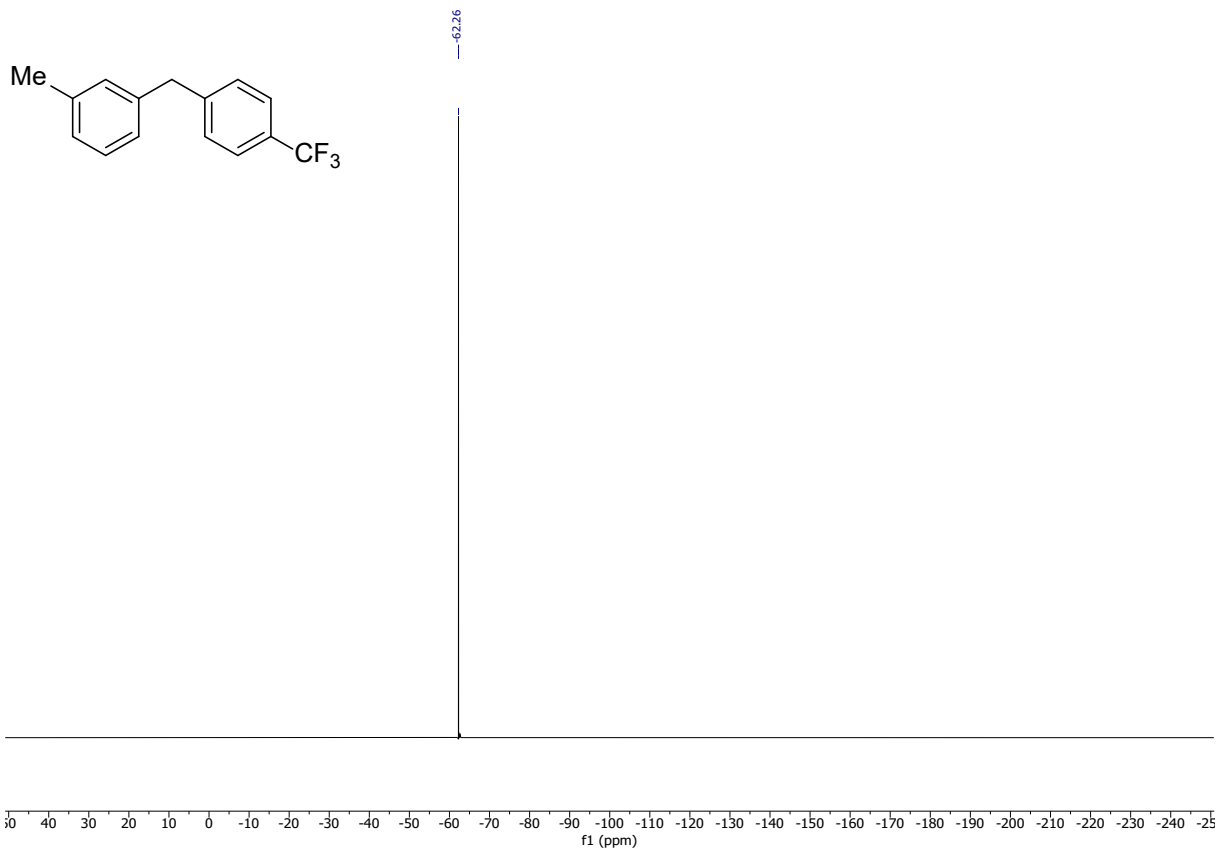

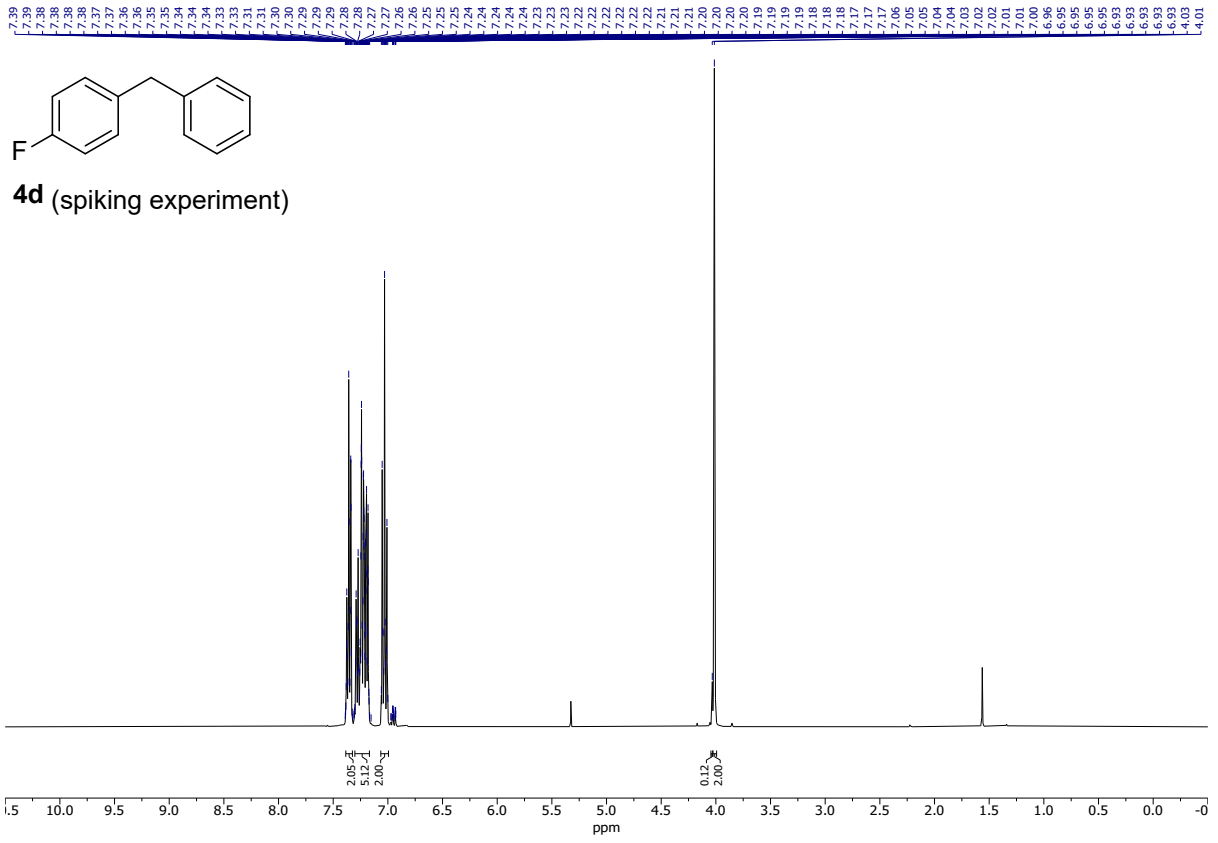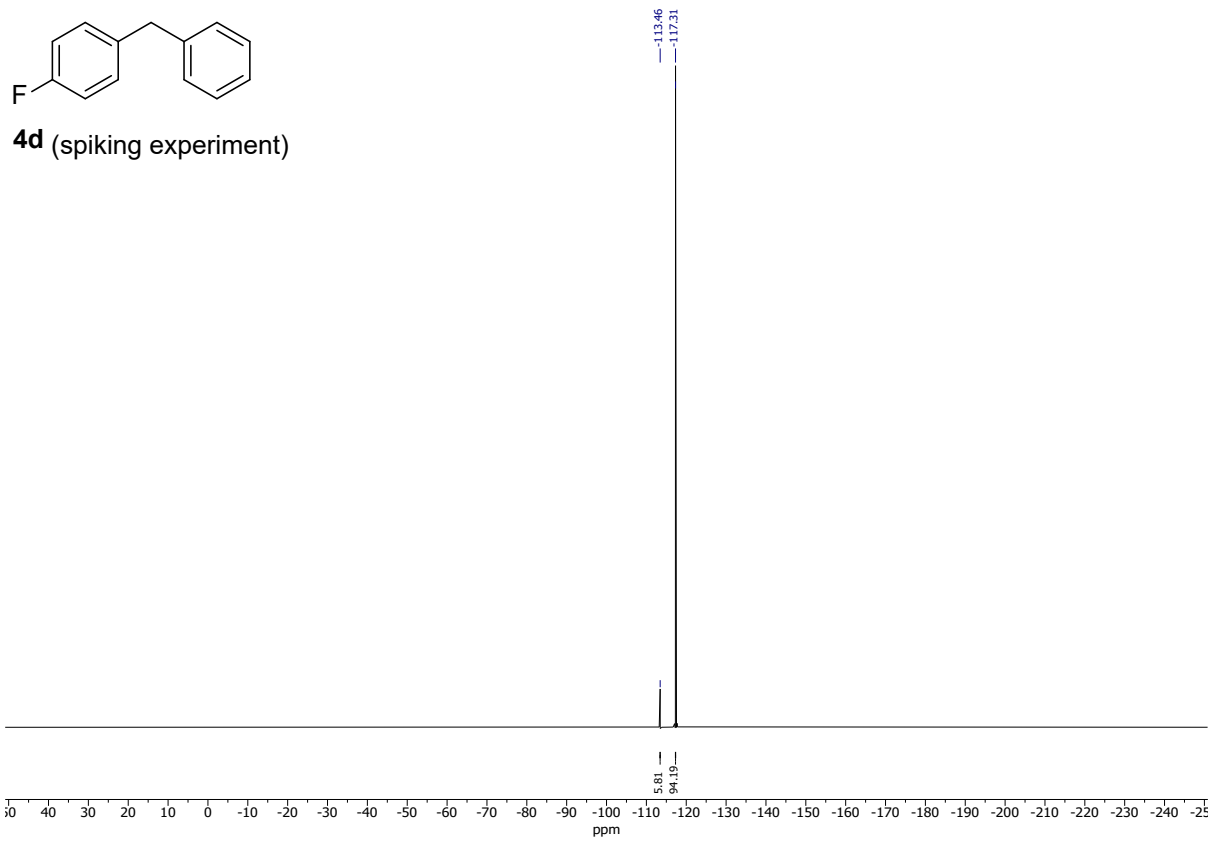



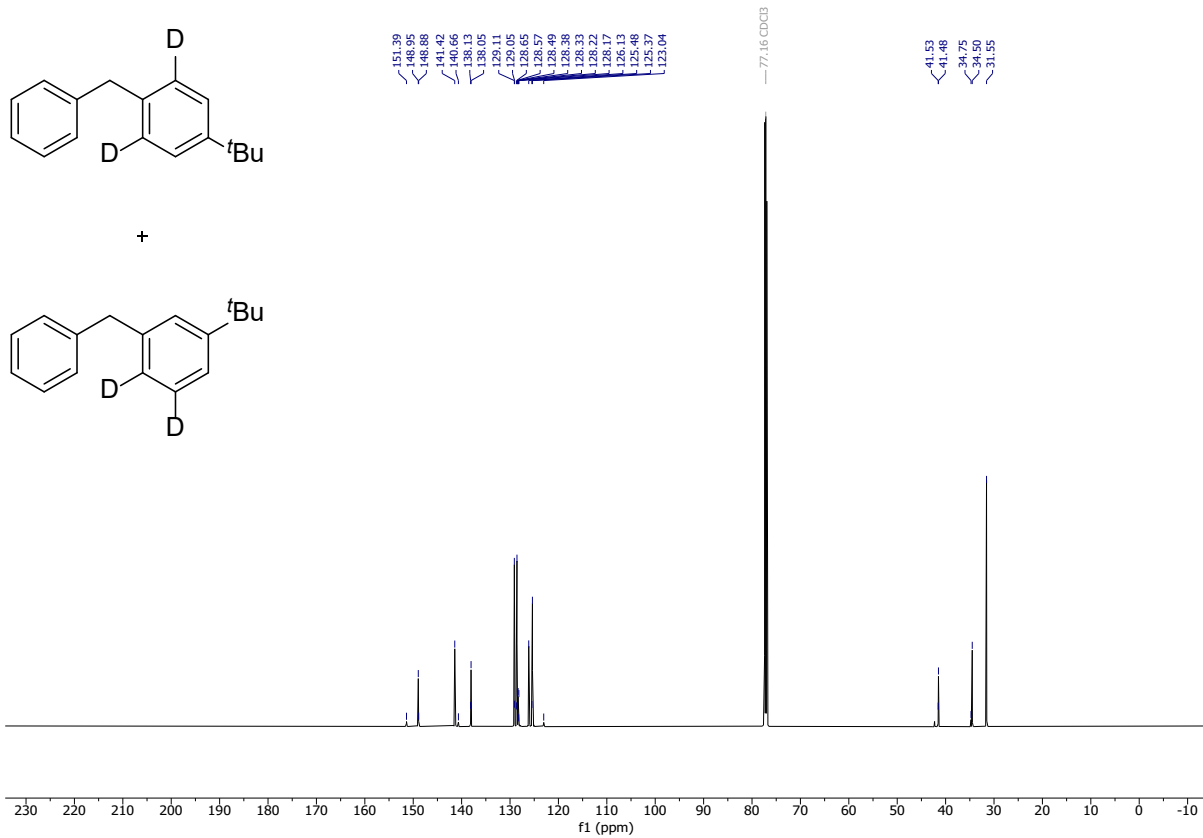

## 9. References

1. X.-C. Wang, W. Gong, L.-Z. Fang, R.-Y. Zhu, S. Li, K. M. Engle and J.-Q. Yu, *Nature*, 2015, **519**, 334-338.
2. S. Kim, J. W. Ginsbach, J. Y. Lee, R. L. Peterson, J. J. Liu, M. A. Siegler, A. A. Sarjeant, E. I. Solomon and K. D. Karlin, *J. Am. Chem. Soc.*, 2015, **137**, 2867-2874.
3. M. Winters, J. B. DuHadaway, K. N. Pham, A. Lewis-Ballester, S. Badir, J. Wai, E. Sheikh, S. R. Yeh, G. C. Prendergast, A. J. Muller and W. P. Malachowski, *Eur. J. Med. Chem.*, 2019, **162**, 455-464.
4. D.-M. Yan, Q.-Q. Zhao, L. Rao, J.-R. Chen and W.-J. Xiao, *Chem. Eur. J.*, 2018, **24**, 16895-16901.
5. T. Mohy El Dine, W. Erb, Y. Berhault, J. Rouden and J. Blanchet, *J. Org. Chem.*, 2015, **80**, 4532-4544.
6. G.-Q. Hu, J.-W. Bai, E.-C. Li, K.-H. Liu, F.-F. Sheng and H.-H. Zhang, *Org. Lett.*, 2021, **23**, 1554-1560.
7. M. A. Tandiyary, Y. Masui and M. Onaka, *Tetrahedron Lett.*, 2014, **55**, 4160-4162.
8. G. Toupalas, G. Thomann, L. Schlemper, M. A. Rivero-Crespo, H. L. Schmitt and B. Morandi, *ACS Catal.*, 2022, **12**, 8147-8154.
9. J. R. Schmink and N. E. Leadbeater, *Org. Lett.*, 2009, **11**, 2575-2578.
10. T. He, H. F. T. Klare and M. Oestreich, *ACS Catal.*, 2021, **11**, 12186-12193.
11. X. Li, Y. Feng, L. Lin and G. Zou, *J. Org. Chem.*, 2012, **77**, 10991-10995.
12. Z. Guan, B. Li, G. Hai, X. Yang, T. Li and B. Tan, *RSC Adv.*, 2014, **4**, 36437-36443.
13. P. Maity, D. M. Shacklady-McAtee, G. P. A. Yap, E. R. Sirianni and M. P. Watson, *J. Am. Chem. Soc.*, 2013, **135**, 280-285.
14. D. R. Willcox, G. S. Nichol and S. P. Thomas, *ACS Catal.*, 2021, **11**, 3190-3197.
15. G. Wu, S. Xu, Y. Deng, C. Wu, X. Zhao, W. Ji, Y. Zhang and J. Wang, *Tetrahedron*, 2016, **72**, 8022-8030.
16. Y.-Y. Sun, J. Yi, X. Lu, Z.-Q. Zhang, B. Xiao and Y. Fu, *Chem. Commun.*, 2014, **50**, 11060-11062.
17. J. Zhu, M. Pérez, C. B. Caputo and D. W. Stephan, *Angew. Chem. Int. Ed.*, 2016, **55**, 1417-1421.
18. H.-S. Jung and S.-H. Kim, *Synlett*, 2015, **26**, 666-670.
19. P. Zhang, J. Xu, Y. Gao, X. Li, G. Tang and Y. Zhao, *Synlett*, 2014, **25**, 2928-2932.
20. J. C. Tellis, D. N. Primer and G. A. Molander, *Science*, 2014, **345**, 433-436.
21. J. Zhu, M. Pérez and D. W. Stephan, *Angew. Chem. Int. Ed.*, 2016, **55**, 8448-8451.
22. Y. Makida, Y. Matsumoto and R. Kuwano, *Synlett*, 2017, **28**, 2573-2576.
23. T. Wang, J. Guo, X. Wang, H. Guo, D. Jia, H. Wang and L. Liu, *RSC Adv.*, 2019, **9**, 5738-5741.
24. N. Henry, C. Enguehard-Gueiffier, I. Thery and A. Gueiffier, *Eur. J. Org. Chem.*, 2008, **2008**, 4824-4827.
25. J. Tang, L. Lv, X.-J. Dai, C.-C. Li, L. Li and C.-J. Li, *Chem. Commun.*, 2018, **54**, 1750-1753.
26. J. Barluenga, M. Tomás-Gamasa, F. Aznar and C. Valdés, *Nat. Chem.*, 2009, **1**, 494-499.
